# Supplementary material for: Mesmerize is a dynamically adaptable user-friendly analysis platform for 2D and 3D calcium imaging data
Source: PubMed Central journal article supplement (PMC8589933; doi:10.1038/s41467-021-26550-y), 2021-11-12
Supplement: 41467_2021_26550_MOESM1_ESM.pdf [file 41467_2021_26550_MOESM1_ESM.pdf]

Supplementary Figure 1: pvc-7 mouse dataset analysis graph

caiman\_motion\_correction.0

```
max_shifts_x: 32
max_shifts_y: 32
iters_rigid: 2
name_rigid: Does not matter
max_dev: 3
strides: 156
overlaps: 78
upsample: 4
name_elas: 000
output_bit_depth: Do not convert
bord_px: 37
```

cnmf.0

```
fr: 31.0
bord_px: 37
Input: Current Work Environment
p: 2
gnb: 1
merge_thresh: 0.25
rf: 70
stride_cnmf: 40
k: 16
gSig: 8
min_SNR: 2.5
rval_thr: 0.8
cnn_thr: 0.8
decay_time: 20
name_cnmf: 000
re fit: True
```

cnmf.1

```
item_name: 000
re fit: True
border_pix: 37
is_3d: False
cnmf_kwargs:
--> 'p': 2, 'nb': 1, 'merge_thresh': 0.7, 'rf': 70, 'stride': 40, 'K': 18, 'gSig': [8, 8], 'ssub': 1, 'tsub': 1, 'method_init': 'greedy_roi', 'border_pix': 37
eval_kwargs:
--> 'min_SNR': 2.5, 'rval_thr': 0.8, 'use_cnn': True, 'min_cnn_thr': 0.8, 'cnn_lowest': 0.1, 'decay_time': 1.0, 'fr': 31.0
```

caiman\_detrend\_df\_f.0

```
quantileMin: 8
frames_window: 1000
flag_auto: True
use_fast: False
use_residuals: True
detrend_only: False
```

spawn\_transmission.0

```
sub_dataframe_name: root
dataframe_ filter_history:
--> 'dataframe_ filter_history': None
```

normalize.0

```
data_column: _RAW_CURVE
units: time
```

tuning\_curves.0

```
data_column: _DFOF
method: max
start_offset: 0
end_offset: 0
dpt_column: _DFOF
include_unlabelled: False
```

## Supplementary Figure 1: pvc-7 mouse dataset analysis graph

A graphical representation of the analysis steps that were performed to create Fig 2e-h. These graphs can be generated in Mesmerize from most plot windows. Briefly, the raw calcium imaging video was motion corrected and signal extraction was performed using CNMF. The parameters for caiman motion correction, i.e. NoRmCorre, and CNMF can be seen in the analysis graph.  $\Delta F/F_0$  was calculated using caiman's `detrend_df_f` function, the parameters for this step can again be seen. The next step, `spawn_transmission` indicates that the data were loaded on a flowchart. The raw curve data were then min-max normalized, as shown in the heatmap of Fig 2e. The  $\Delta F/F_0$  (\_DFOF) data were then used to create tuning curves to determine the stimulus tuning of each cell which is shown in Fig 2f-h.

Supplementary Figure 2: k-means clustering of different *Ciona intestinalis* cell types.

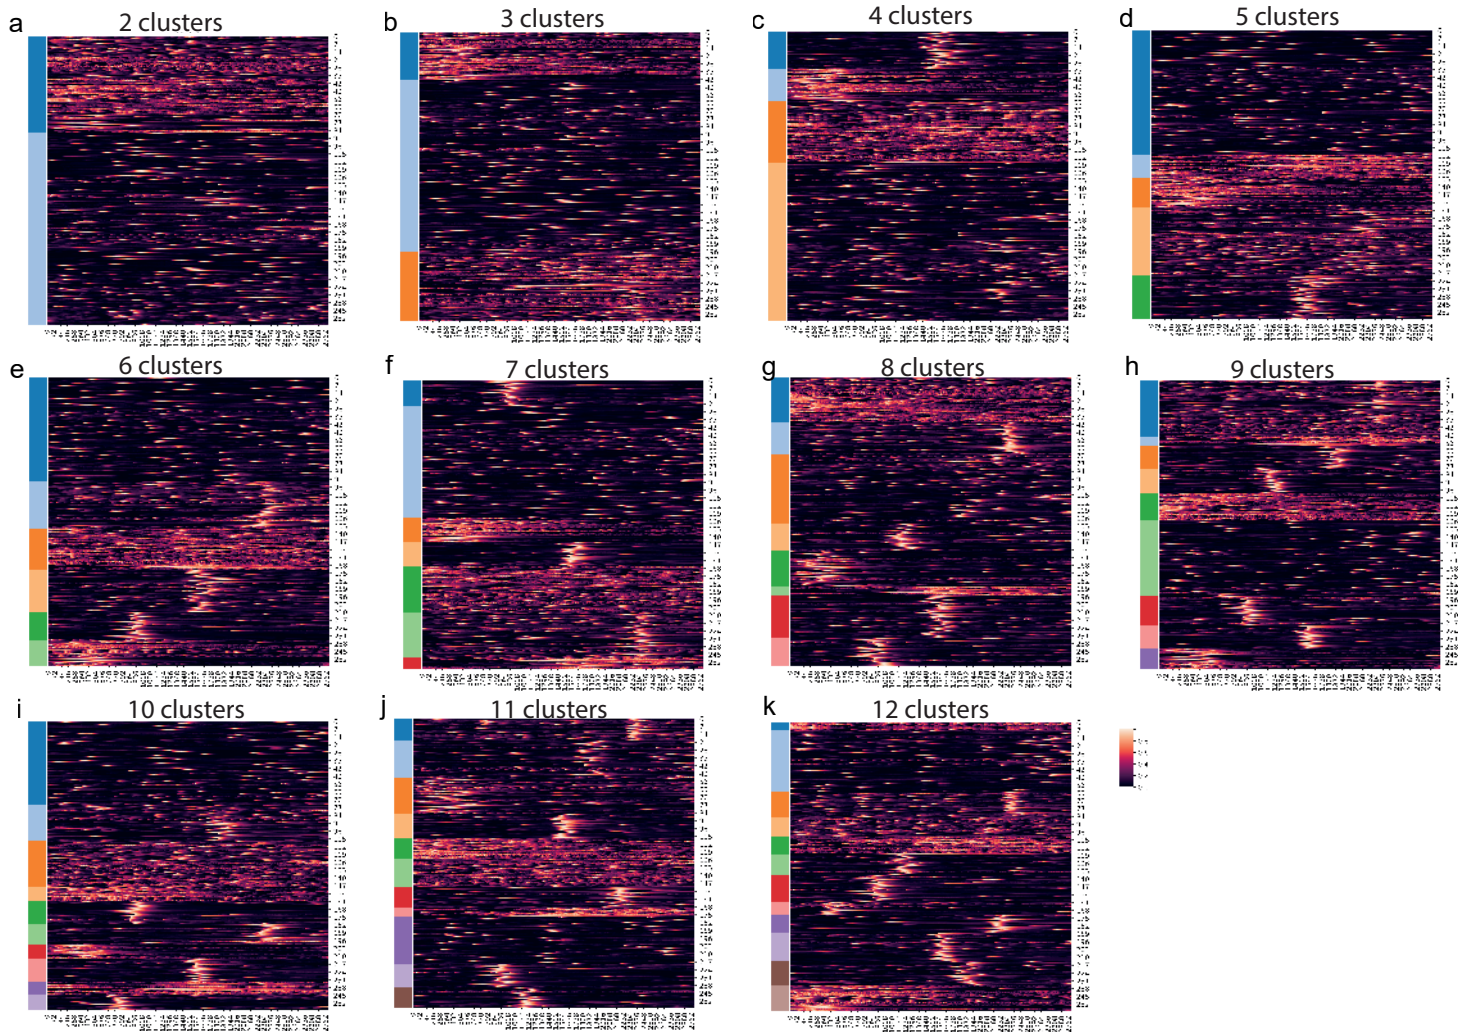

**Supplementary Figure 2: k-means clustering of different *Ciona intestinalis* cell types.**

(a-k) Heatmaps showing k-means clustering results for varying numbers of clusters. (a) 2 clusters (b) 3 clusters (c) 4 clusters (d) 5 clusters (e) 6 clusters (f) 7 clusters (g) 8 clusters (h) 9 clusters (i) 10 clusters (j) 11 clusters (k) 12 clusters, traces are merely temporally aligned. The color bar on the y-axis indicates cluster labels. It is important to note that the calcium imaging data shown in these heatmaps are not temporally aligned, it is a combination of spontaneous activity recordings from multiple animals. This shows that k-means clustering, which uses Euclidean distances, aligns calcium imaging traces. It shows that this approach is not suited for clustering spontaneous calcium activity that are not temporally aligned. Color bar legend indicates scale for min-max normalized traces.

Example 1

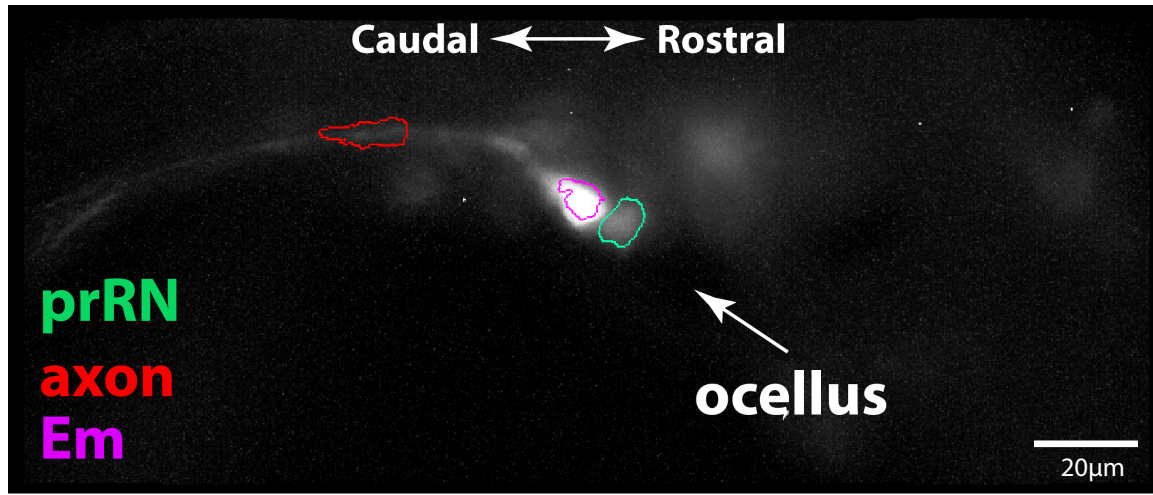

Example 2

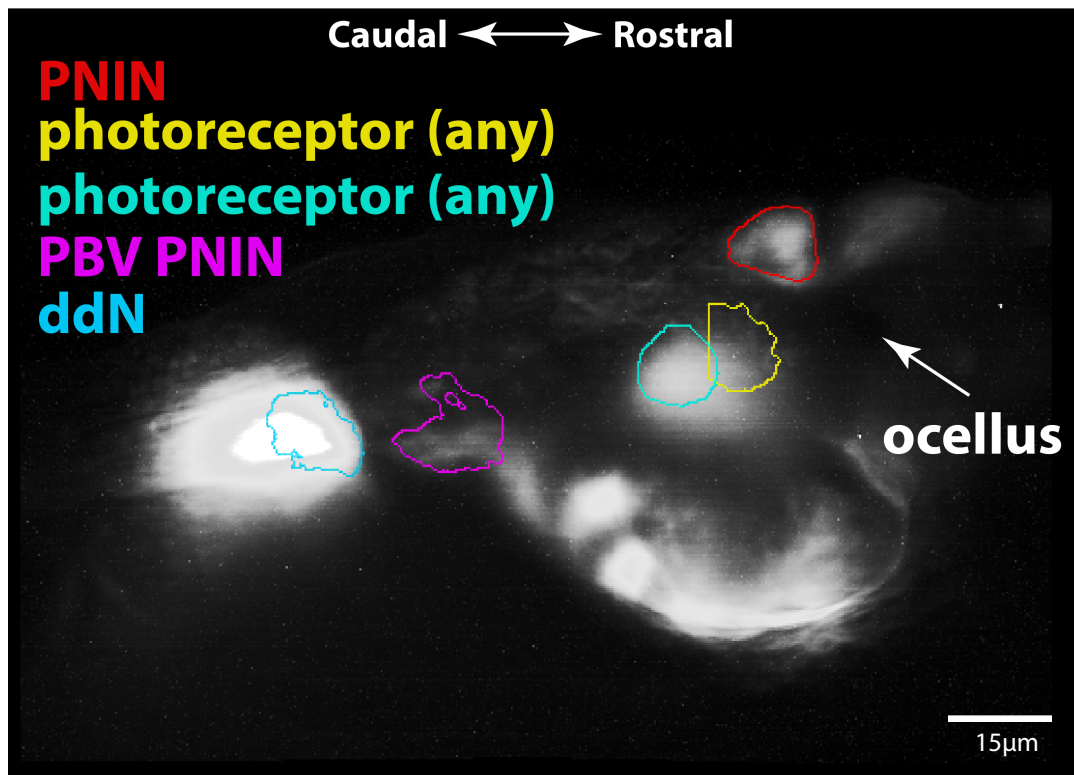

Example 3

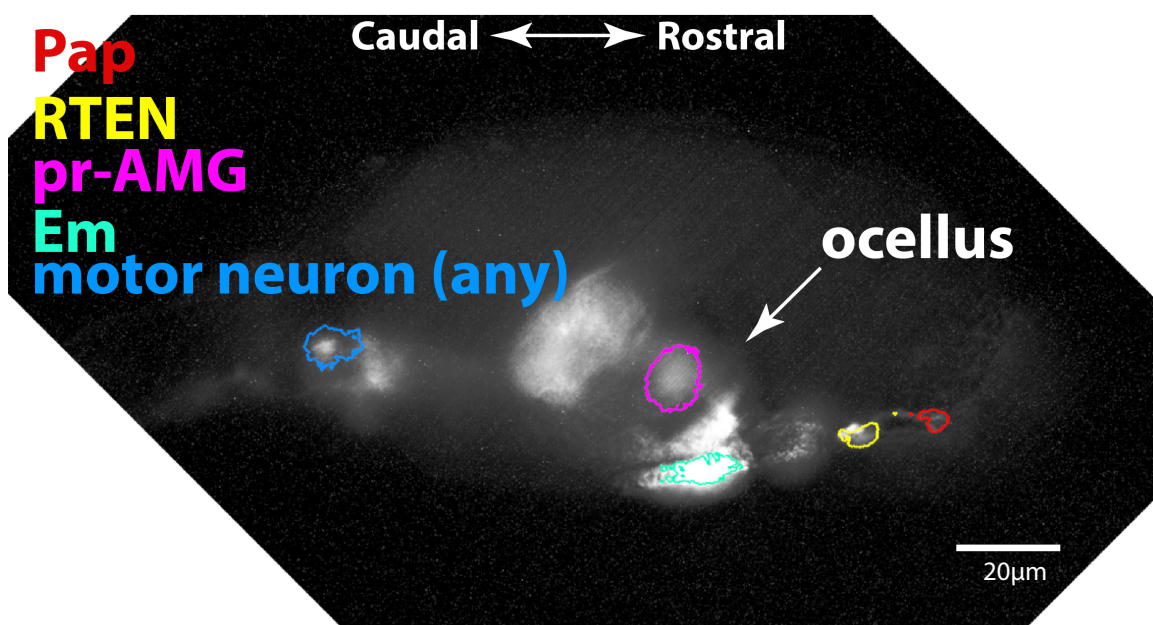

### Supplementary Figure 3: Cell type identification in *C. intestinalis*

We show how cell-type identification was performed using the localization of the cell and its proximity to landmarks such as the ocellus. Example 1: **Em**: Eminens neurons are located near the dorsal surface, large and prominent with thick axons; **prRN**: Photoreceptor relay neurons are located near the ocellus, and ventral to Eminens neurons. Could also possibly be pr-AMG neuron or other photoreceptor neuron; **axon**: axon of the Em neuron (excluded in analysis). Example 2: **PNIN**: Triangular cell body, near ocellus & near dorsal surface; **photoreceptor (any)**: neurons in general proximity to the ocellus; **PBV PNIN**: located near the neck, slightly ventral; **ddN**: located in the neck, rostral to other motor neurons. Example 3: **Pap**: Palp neuron, this is an axon, the palp is out of plane; **RTEN**: Directly downstream of palp neurons; **pr-AMG**: near ocellus, below eminens, could possibly be another type of photoreceptor neuron; **Em**: Eminens neuron, large, close to dorsal surface, near ocellus; **motor neuron (any)**: Located in the neck region.

Supplementary Figure 4: SOSD plot

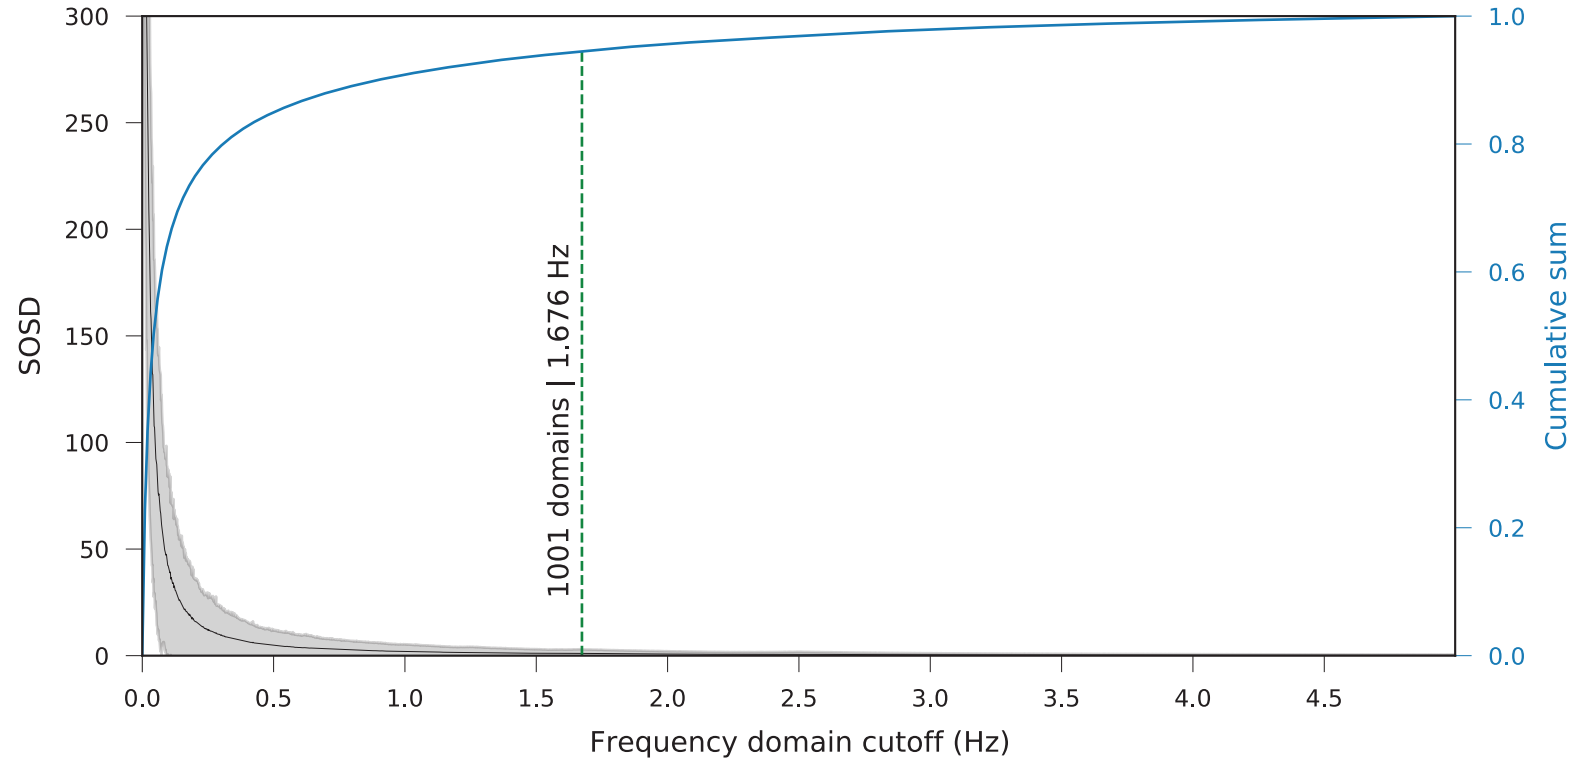

#### **Supplementary Figure 4: SOSD plot**

SOSD plot between the raw curves and interpolated Inverse Fourier Transforms (IFTs) of the DFTs with a step-wise increase in the frequency cut-off.



Supplementary Figure 5: k-Shape clustering analysis graph

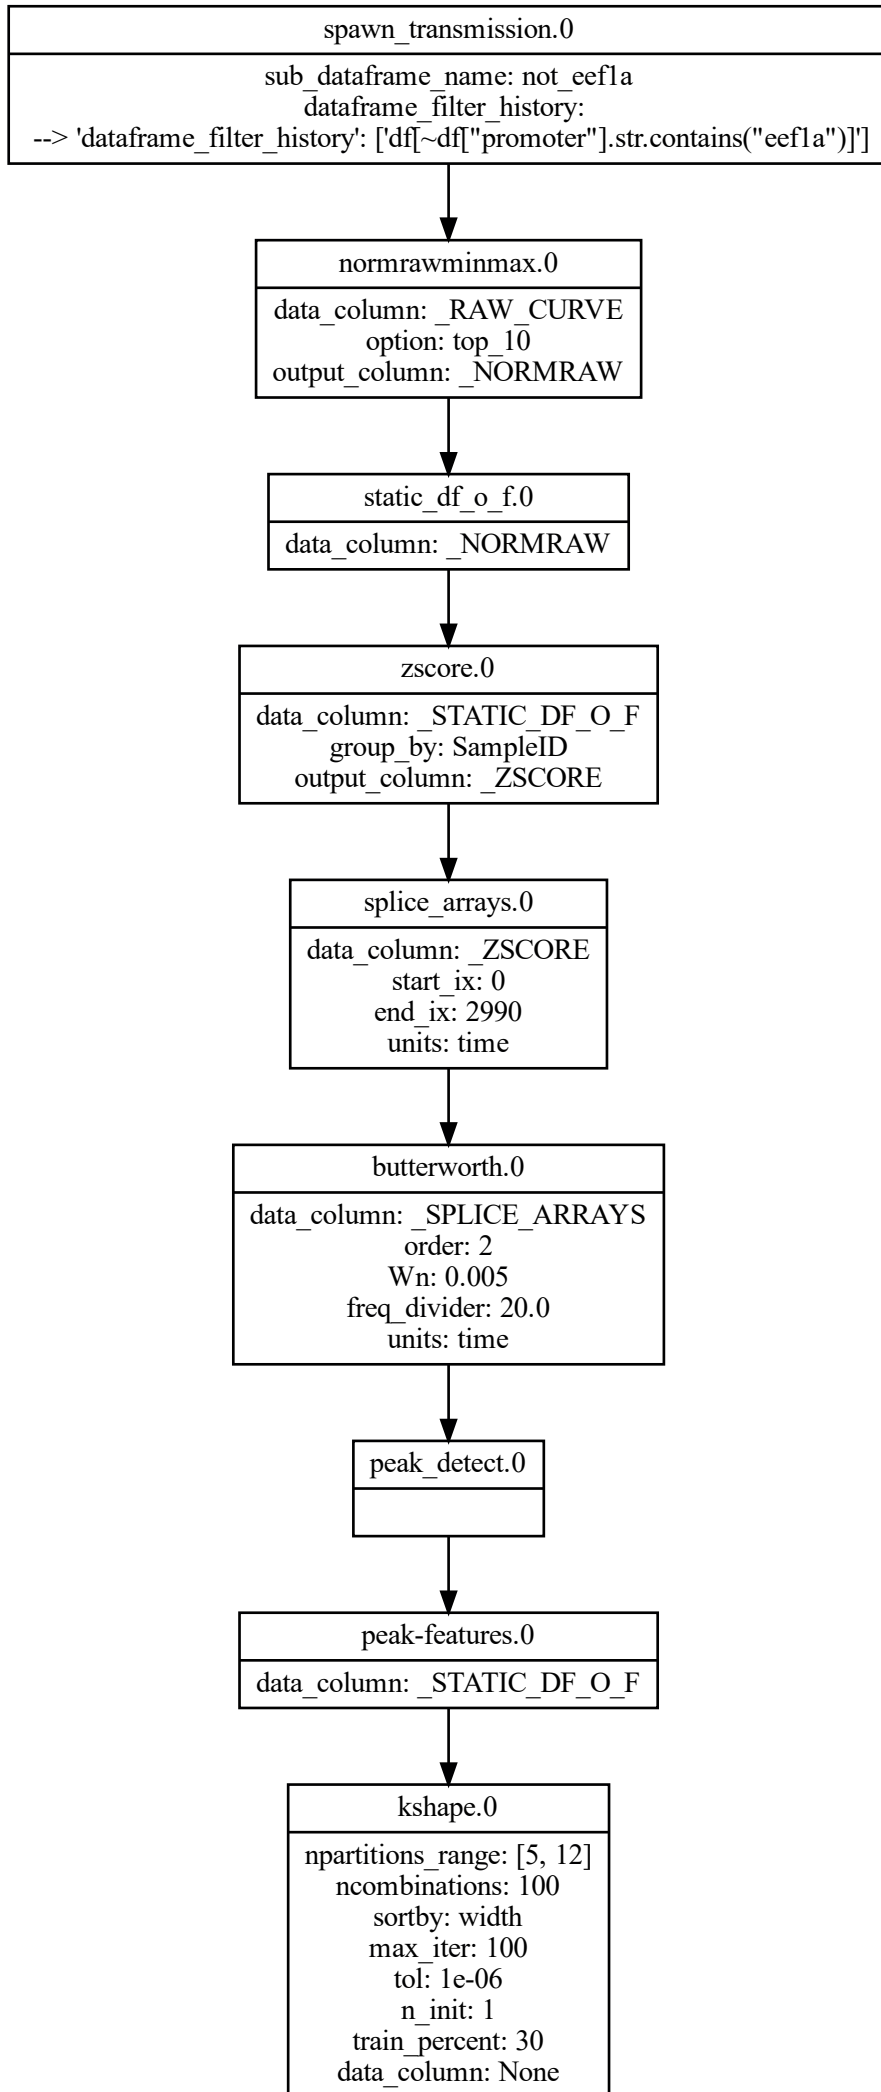

### **Supplementary Figure 5: k-Shape clustering analysis graph.**

A graphical representation of the analysis steps that were performed to create Fig 6a. Briefly, after peak-detection peak features were extracted using the  $\Delta F/F_0$  curve (Static\_DF\_O\_F nodes in Mesmerize). Finally, kShape clustering was performed using the  $\Delta F/F_0$  peak-curves using the parameters shown in the box. The data were divided into partitions, with a range from 5 partitions to 12 partitions. 100 combinations (ncombinations) indicates that 100 different centroid seeds were tried for each partition. The partitions were created by sorting the peak-curves according to peak-width. For the kShape clustering algorithm itself, 100 iterations were performed for each combination of npartitions\_range and ncombinations parameter. The tolerance was set to 1e-6 and training was performed using 30% of the total peak-curve data.

Supplementary Figure 6: Zebrafish dataset analysis graph.

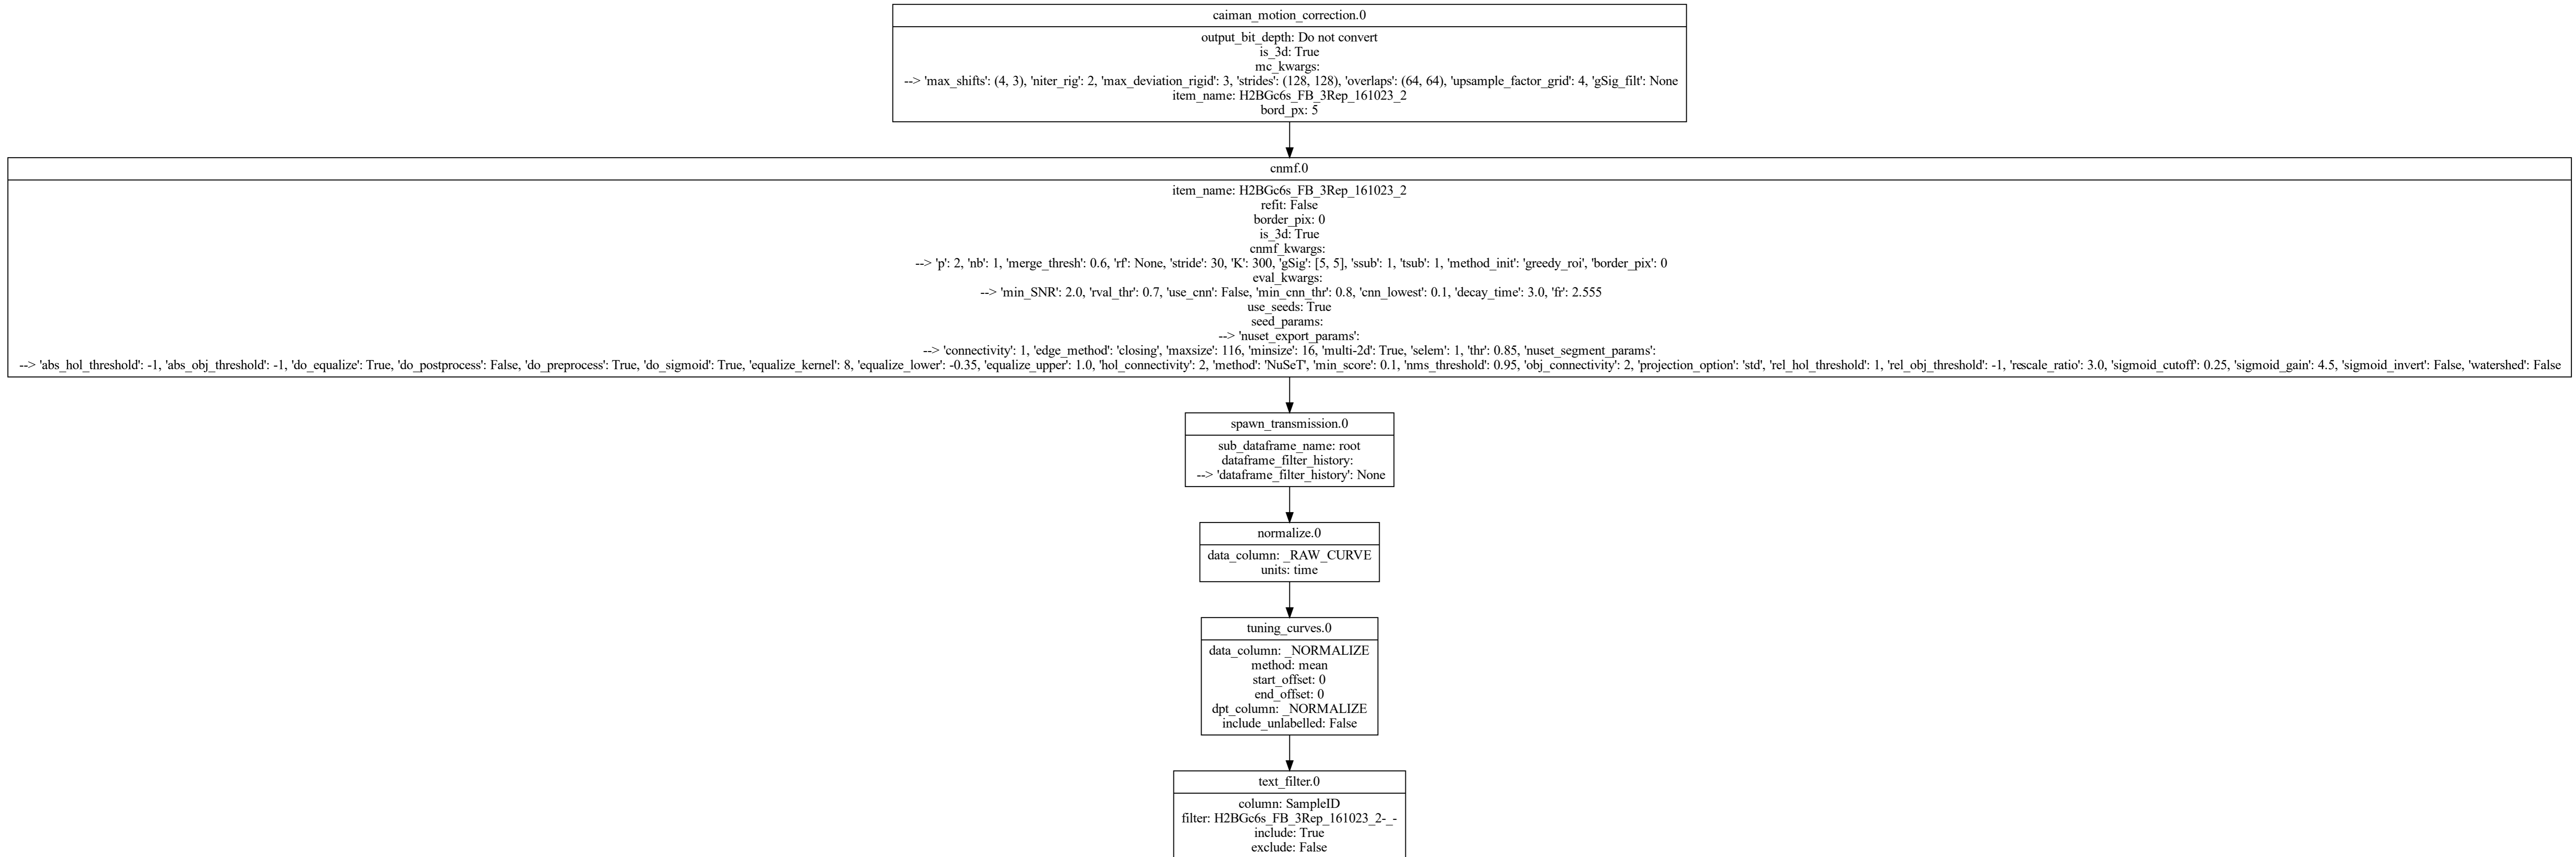

### **Supplementary Figure 6: Zebrafish dataset analysis graph.**

A graphical representation of the analysis steps that were performed to create Fig 3. The steps were like those used for Figure 2, see Supplementary Figure 1.

**Supplementary Table 1: Number of animals and trials per promoter.**

| <b>Promoter</b>                    | <b>Animals</b> | <b>Trials</b> | <b>Labelled cell types</b>                                                                |
|------------------------------------|----------------|---------------|-------------------------------------------------------------------------------------------|
| Proprotein/Prohormone convertase 2 | 7              | 7             | amg, atep, cor_ass_bvin, dcen, eminens, mn, palp, pbv_pnin, pr, pr_amg, rten              |
| Brn3b/POU4                         | 10             | 12            | amg, antenal_relay, atena, atep, ddn, eminens, palp, pr, pr_rn, rten                      |
| CesA                               | 8              | 11            | epidermis                                                                                 |
| CNG Channel 4                      | 2              | 3             | pr                                                                                        |
| DMRT1                              | 8              | 13            | atena, atep, ddn, ependymal, palp, pbv_pnin, pnin, pr, pr_tract_interneuron, rten, vac_in |
| HNK1                               | 5              | 5             | TLCs                                                                                      |
| PDE9                               | 9              | 15            | pr                                                                                        |
| EEF1A1                             | 10             | 15            | Ubiquitous expression                                                                     |

**Supplementary Table 2: Description of abbreviations shown in legend of Fig 4I**

| <b>Abbreviation</b> | <b>Description</b>                                                                         |
|---------------------|--------------------------------------------------------------------------------------------|
| H – EMD – F         | Hierarchical clustering using the EMD between discrete Fourier transforms.                 |
| H – EUC – F         | Hierarchical clustering using the Euclidean distances between discrete Fourier transforms. |
| KMeans – F          | k-means clustering using discrete Fourier transforms as feature vectors.                   |
| KMeans – T          | k-means clustering using calcium traces in the time domain as feature vectors              |

**Supplementary Table 3: Table describing cell types show in legend of Fig 5a**

| <b>Abbreviation</b> | <b>Cell identity</b>                                                  |
|---------------------|-----------------------------------------------------------------------|
| AMG                 | Ascending motor ganglion peripheral interneurons                      |
| antRN               | Antenna 1 relay neurons                                               |
| aATEN               | Anterior apical trunk epidermal neurons                               |
| pATEN               | Posterior apical trunk epidermal neurons                              |
| CESA positive       | CesA positive cell, epidermis cells. Labelled using the CesA promoter |
| cor-ass BVIN        | Coronet associated ciliated brain vesicle interneurons                |
| DCEN                | Dorsal caudal epidermal neurons                                       |
| ddN                 | Descending decussating neurons                                        |
| Em                  | Eminens cell                                                          |
| ependymal           | Ependymal cell                                                        |
| HNK-1 positive      | HNK1 positive cell (TLCs). Labelled using the HNK1 promoter           |
| motor neuron (any)  | Motor Neuron. Exact pair not determined                               |
| Pap                 | Palp cell                                                             |
| PBV PNIN            | Posterior brain vesicle peripheral interneurons                       |
| PNIN                | Peripheral interneurons                                               |
| photoreceptor (any) | Photoreceptor cell. Type not determined                               |
| pr-AMG              | Photoreceptor-ascending motor ganglion neuron relay neurons           |
| prRN                | Photoreceptor relay neurons                                           |
| trIN                | Photoreceptor tract interneuron                                       |
| RTEN                | rostral trunk epidermal neurons                                       |
| vacIN               | Photoreceptor associated vacuolated neurons                           |

**Supplementary Table 4: List of *Ciona intestinalis* promoters used in our study.**

| Gene Unique ID   | Gene Model ID | Name                               | Abbr.   | Length |
|------------------|---------------|------------------------------------|---------|--------|
| Cirobu.g00010959 | KH.L128.92    | Proprotein/Prohormone convertase 2 | pc2     | 2.86kb |
| Cirobu.g00008038 | KH.C7.211     | CesA                               | cesa    | 2.2kb  |
| Cirobu.g00014653 | KH.S544.3     | DMRT1                              | dmrt1   | 1.29kb |
| Cirobu.g00004616 | KH.C2.42      | Brn3b/POU4                         | brn3b   | 3.78kb |
| Cirobu.g00006491 | KH.C4.403     | HNK1 <sup>33</sup>                 | hnk1    | 3.0kb  |
| Cirobu.g00010171 | KH.C9.608     | PDE9                               | pde9    | 4.43kb |
| Cirobu.g00012642 | KH.L42.6      | CNG Channel 4                      | cng_ch4 | 1.48kb |
| Cirobu.g00003963 | KH.C14.52     | EEF1A1                             | eef1a   | 1.96kb |



**Supplementary Table 5: List of primers used to amplify promoters used in our study.**

| Primer name         | Primer sequence                                                                                                 |
|---------------------|-----------------------------------------------------------------------------------------------------------------|
| PC2 GW-FW           | g g g g a c a a c t t t g t a t a g a a a g t t g C A G C A G T C A A A G G G T T T C T T G A A A C A C         |
| PC2 GW-RV           | g g g g a c t g c t t t t t t g t a c a a a c t t g G C T G C T T T A A G A A T T C T T C G T T T T T T C A C   |
| CesA GW-FW          | g g g g a c a a c t t t g t a t a g a a a g t t g C C C G G T G C T T T G A A A A T T G A C A A G               |
| CesA GW-RV          | g g g g a c t g c t t t t t t g t a c a a a c t t g G A A C T C G T A T A T C T T G A T G G T T T G G           |
| DMRT1 GW-FW         | g g g g a c a a c t t t g t a t a g a a a g t t g T C A G A A C G A G G C G C T A C A T G A T C                 |
| DMRT1 GW-RV         | g g g g a c t g c t t t t t t g t a c a a a c t t g C A C T G T T C T A A G C A A G G T A T C A A G G           |
| Brn3b/Pou4<br>GW-FW | g g g g a c a a c t t t g t a t a g a a a g t t g C G A C T G T A A C A A G T T C T A A A C A G A G C           |
| Brn3b/Pou4<br>GW-RV | g g g g a c t g c t t t t t t g t a c a a a c t t g A T A T C G T A T C A A A A A T A T A C A A T A A G T C T G |
| HNK1 GW-FW          | g g g g a c a a c t t t g t a t a g a a a g t t g C A G C A C G G G T T G A G T C A A T G A A A C               |
| HNK1 GW-RV          | g g g g a c t g c t t t t t t g t a c a a a c t t g A C G C A C C A G G A A G T T A A A T A A A A C C           |
| PDE9 GW-FW          | g g g g a c a a c t t t g t a t a g a a a g t t g A T T C A T G G C T G A T A T A C C C G G T T G               |
| PDE9 GW-RV          | g g g g a c t g c t t t t t t g t a c a a a c t t g C T A T G C T G T T G T A G A A T C T G T A T A T A G       |
| CNG4 GW-FW          | g g g g a c a a c t t t g t a t a g a a a g t t g C T C C G T T T C G T G G A A A A C T C A T T T T T C         |
| CNG4 GW-RV          | g g g g a c t g c t t t t t t g t a c a a a c t t g A C T G G A C T C T A G A C A C A G A C A G C               |
| EEF1A1 GW-<br>FW    | g g g g a c a a c t t t g t a t a g a a a g t t g G T G A C G G G A A A A C G A T A G T C G                     |
| EEF1A1 GW-<br>RV    | g g g g a c t g c t t t t t t g t a c a a a c t t g T T T G G A A G G T T G G G G T T A A C C                   |

---

# Mesmerize Documentation

*Release 0.6.1*

**Kushal Kolar**

**May 23, 2021**



## OVERVIEW

|                                |            |
|--------------------------------|------------|
| <b>1 New: Video Tutorials!</b> | <b>3</b>   |
| <b>2 Indices and tables</b>    | <b>235</b> |
| <b>Python Module Index</b>     | <b>237</b> |
| <b>Index</b>                   | <b>239</b> |





# Mesmerize

Analyze | Visualize | Share

bioRxiv: <https://doi.org/10.1101/840488>

GitHub: <https://github.com/kushalkolar/MESmerize>

Questions/Discussion: Gitter room

Contact: [kushalkolar@alumni.ubc.ca](mailto:kushalkolar@alumni.ubc.ca)



## NEW: VIDEO TUTORIALS!

**The Main Overview Tutorial playlist provides a quick overview that takes you from raw imaging data, to downstream analysis and interactive visualizations:**

**Additional tutorials on other aspects of Mesmerize will be placed in this playlist:** [https://www.youtube.com/playlist?list=PLgofWiw2s4RF\\_RkGRUfflcj5k5KUTG3o\\_](https://www.youtube.com/playlist?list=PLgofWiw2s4RF_RkGRUfflcj5k5KUTG3o_)

## 1.1 Overview

Mesmerize is a platform for the annotation and analysis of neuronal calcium imaging data. It encompasses the entire process of calcium imaging analysis from raw data to semi-final publication figures that are interactive, and aids in the creation of FAIR-functionally linked datasets. It is applicable for a broad range of experiments and is intended to be used by users with and without a programming background.

### 1.1.1 Welcome Window

Share your analysis pipelines and figures along with your publication



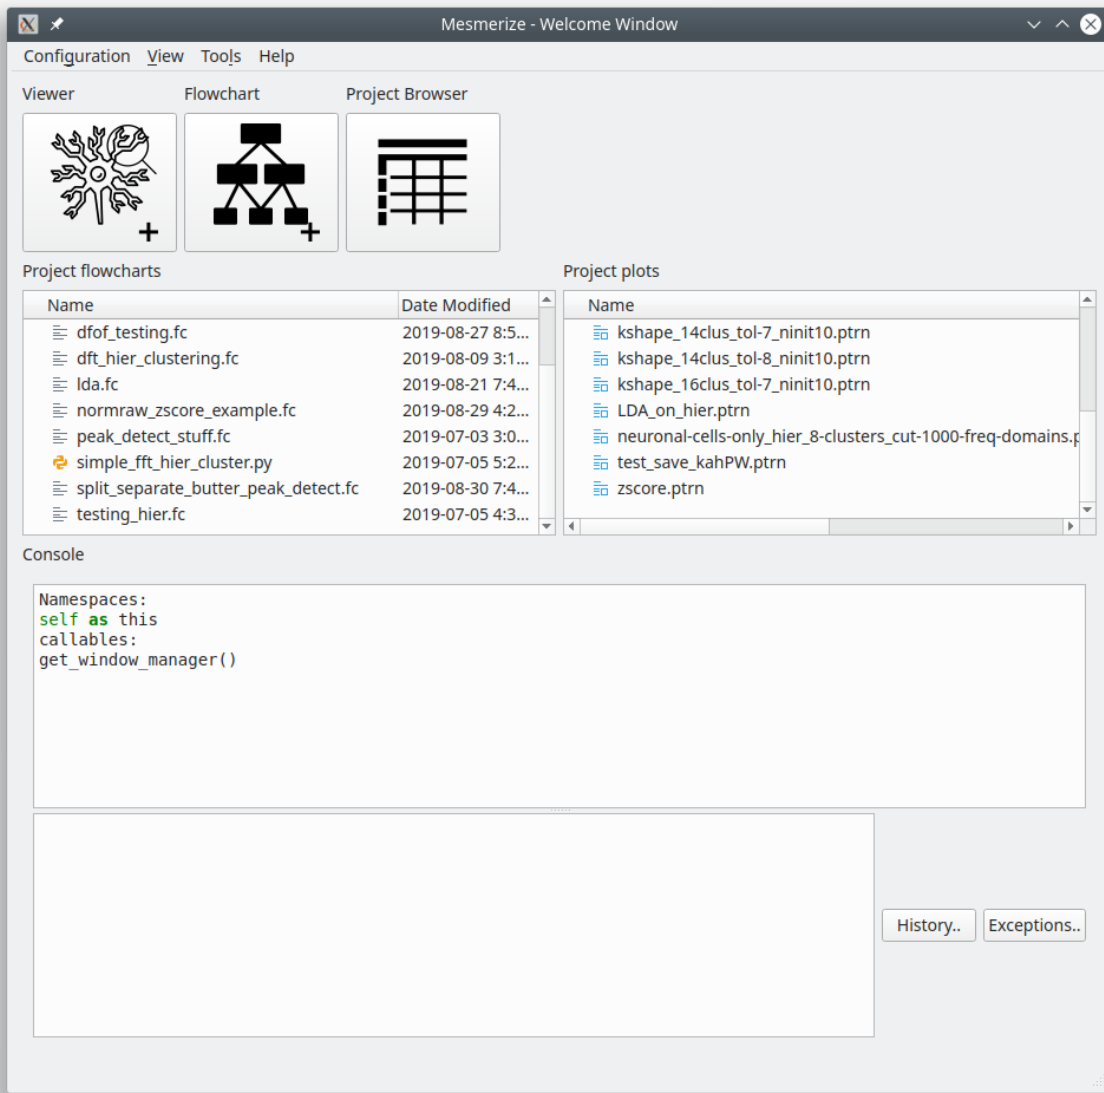

### 1.1.2 The Viewer

Explore image sequences, and use various modules for pre-processing and signal-extraction. Annotate regions of interest with any relevant information. Map stimuli/behavior periods.

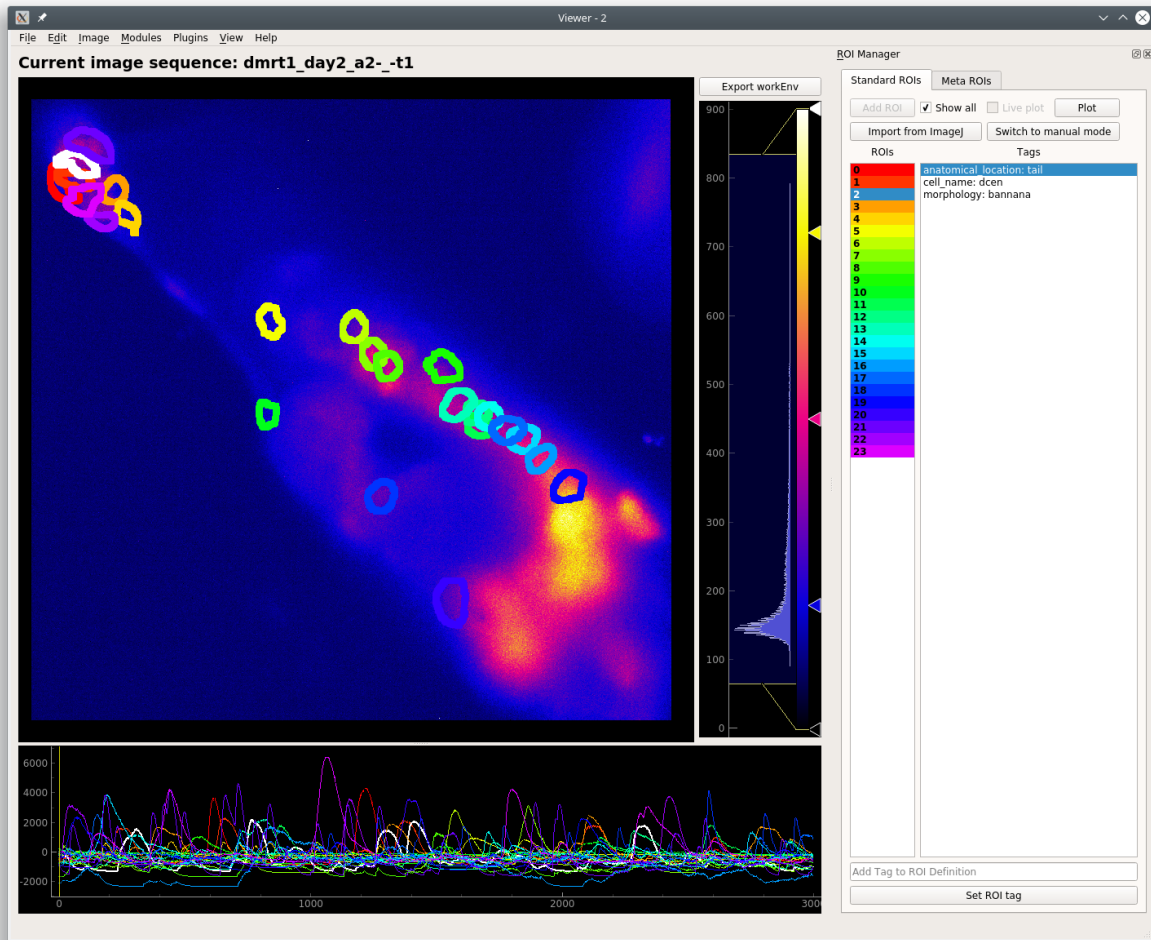

### 1.1.3 CalmAn modules

Mesmerize contains front-end GUI modules for the CalmAn library. This makes it very easy for users without a programming background to use the library.

#### CalMAn Elastic Motion Correction

CalMan Motion Correction  

### Rigid correction

Output bit depth:  ▾

max shifts X (pixels):  ▲▼

max shifts Y (pixels):  ▲▼

iterations for rigid:  ▲▼

If do only rigid correction add here

---

### Elastic correction

max deviation from rigid:  ▲▼

strides (pixels):  ▲▼

overlaps (pixels):  ▲▼

upsample grid:  ▲▼

CNMFE

CNMF-E 🖼️ 🗑️

Input:

### Inspect Correlation and PNR

gaussian width of a 2D gaussian kernel, which approximates a neuron  
3 times less than the average diameters of a neuron (pixels)

gSig:  Must be an even number

**Stop here:**

---

### CNMF-E

Minimum correlation of peak

min\_corr:

Minimum peak to noise ratio

min\_pnr:

Adaptive way to set threshold on the transient size

min\_SNR:

Threshold on space consistency  
If lower more components will be accepted, potentially with worse quality

r\_values\_min:

Average decay time of calcium spikes (seconds)

decay\_time:

Half size of patch

rf:

Overlap of patches (at least 4 times the size of a neuron/cell)

overlap:

Global number of background components

gnb:

Background components per patch

nb\_patch:

Number of neurons/cell per patch

k:

**Perform CNMF-E:**

### 1.1.4 Batch Manager

Computationally intense procedures performed can be organized with the Mesmerize Batch Manager.

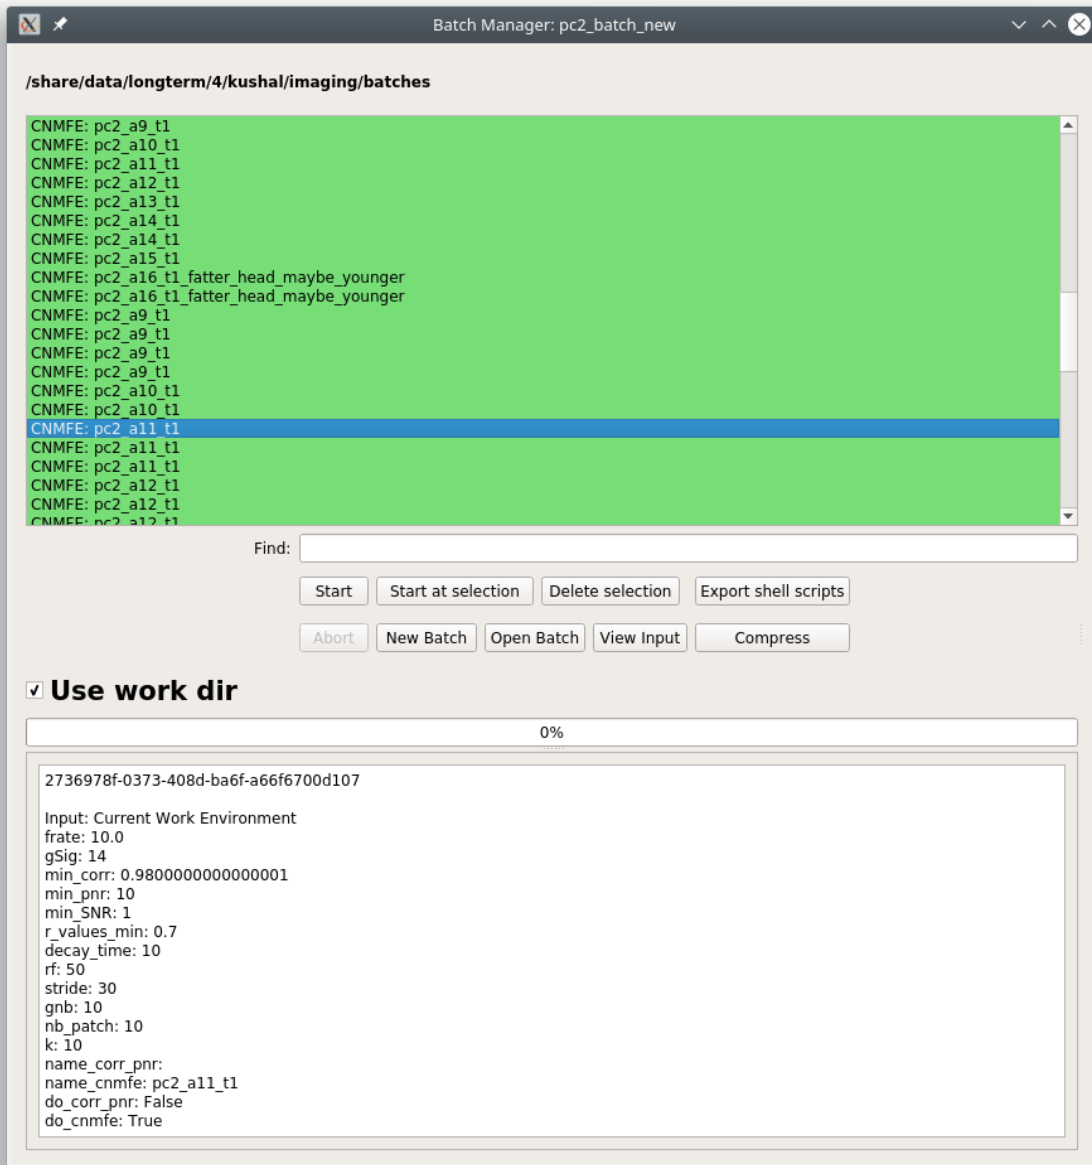

## 1.1.5 Project Organization

Explore project data and create experimental groups.

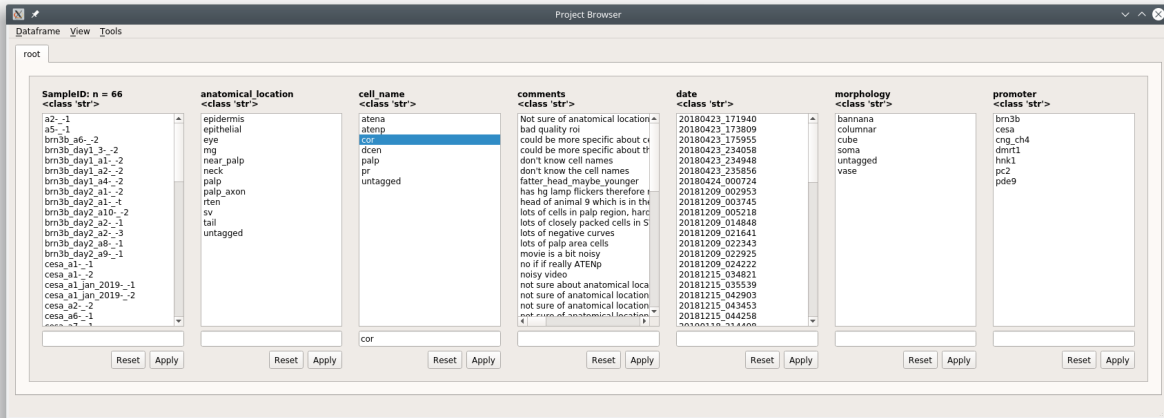

## 1.1.6 Data analysis - pyqtgraph programmable flowcharts.

Build your own analysis pipelines using flowcharts.

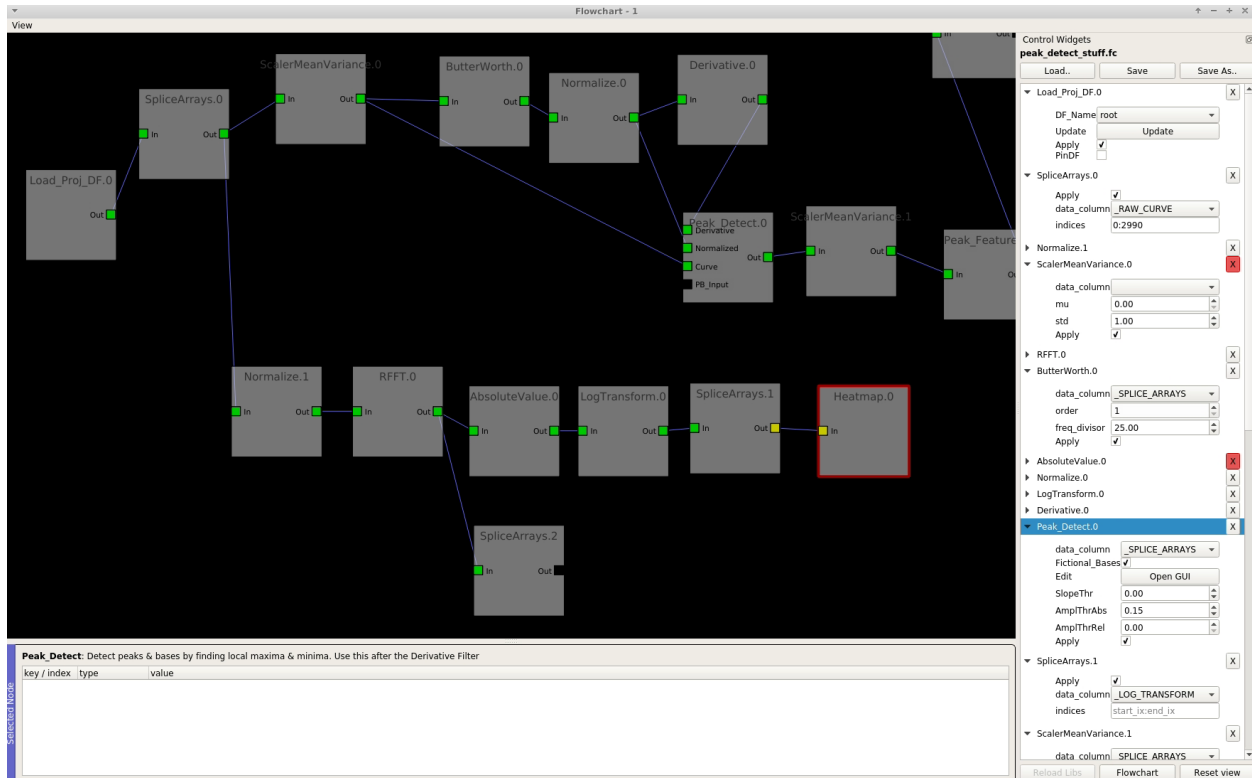

## 1.1.7 Interactive Plots

Create shareable interactive plots where the analysis history of every datapoint is traceable. Explore information associated with a datapoint, such as the spatial localization of its parent ROI and raw data.

### Interactive Heatmaps

### Interactive Cross-correlation analysis

Other types of plots: Beeswarm, Violins, KShape, Proportions, Scatter

## 1.2 Installation

Mesmerize can be installed on Linux, Mac OSX and Windows. On Windows, Mesmerize can be installed in an anaconda environment. For Mac OSX and Linux you may use either virtual environments or conda environments, but we have had much better experience with virtual environments.

### 1.2.1 All platforms

We provide a ready to use VM with Mesmerize and all features pre-installed. You can run this VM on Windows, Mac OSX, or Linux. This is the easiest way to get started with Mesmerize if you don't want to setup anaconda or virtual environments by yourself. Just install VirtualBox and import the `mesmerize-v060-2-vm.ova` file.

- VirtualBox: <https://www.virtualbox.org/wiki/Downloads>
- Download the VM file `mesmerize-v060-2-vm.ova` from zenodo: <https://zenodo.org/record/4738514>

When you start the VM, just double click the mesmerize launcher on the desktop.

- You can setup *Shared Folders* in the settings for the VM to share data between the VM and your host computer.
- You can mount network drives etc. from within the VM.
- Do not delete the `venvs` directory, this will remove the virtual environment for Mesmerize.
- An example batch with a few examples from the caiman sample data is provided at `/home/user/example_batch`.

The details for the user account on the VM are:

```
username: user | password: password |
```

You can use the same password for `sudo`.

By default the VM is set to use 7 threads and 12GB of RAM. You may modify this according to the resources available on your host computer. You generally want to leave 2-4 threads free on your host computer.

If you get the following error when importing the VM you probably don't have enough space on your computer, I recommend importing the VM on a computer that has a few hundred gigabytes of free space:

```
E_INVALIDARG (0x80070057)
```

Video instructions:

To update Mesmerize in the VM:

```
# activate the environment
source ~/venvs/mesmerize/bin/activate
# get the latest version of mesmerize
pip install --upgrade mesmerize
```

**Note:** Virtualization features of your CPU must be enabled in your BIOS. VirtualBox will throw errors if it is not.

## 1.2.2 Linux

### pip (PyPI)

You will need `python==3.6` for tensorflow v1

1. Install python 3.6:

```
# Debian & Ubuntu based
sudo apt-get install python3.6

# Fedora/CentOS
sudo dnf install python36
```

**Note:** If you're using Ubuntu 20.04 you'll need to add a PPA to get python3.6

```
sudo add-apt-repository ppa:deadsnakes/ppa
sudo apt update
sudo apt install python3.6 python3.6-dbg python3.6-dev python3.6-doc python3.6-gdbm
↳python3.6-gdbm-dbg python3.6-tk python3.6-tk-dbg python3.6-venv
```

1. Install build tools and other dependencies:

```
# Debian & Ubuntu based distros
sudo apt-get install build-essential python3.6-dev python3.6-venv qt5-default tcl
↳graphviz git llvm

# Fedora/CentOS
sudo dnf install @development-tools
sudo dnf install python3-devel tcl graphviz
sudo dnf install llvm
```

For other distributions install the equivalent meta package to get build tools.

If you're on Fedora/CentOS you'll also need `redhat-rpm-config`, install using:

```
sudo dnf install redhat-rpm-config
```

1. Create a new virtual environment:

```
python3.6 -m venv <new_venv_path>
```

2. Activate this environment:



```
source <new_venv_path/bin/activate>
```

3. Make sure you have a recent version of pip and setuptools:

```
pip install --upgrade pip setuptools
```

4. Install numpy & cython:

```
pip install numpy cython
```

5. Install tensorflow v1.15 (v2 is not supported for nuset) if you want to use Caiman or Nuset:

```
# CPU bound
pip install tensorflow~=1.15
# GPU
pip install tensorflow-gpu~=1.15
```

6. Install tslearn & bottleneck (optional):

```
pip install tslearn~=0.4.1 bottleneck==1.2.1
```

7. Install mesmerize:

```
pip install mesmerize
```

8. Now you should be able to launch mesmerize from the terminal:

```
mesmerize
```

You will always need to activate the environment for Mesmerize before launching it.

1. If you want Caiman features you'll need to install caiman into the same environment as mesmerize:

```
git clone https://github.com/flatironinstitute/CaImAn
cd CaImAn/
git checkout v1.8.8
source <new_venv_path/bin/activate>
pip install -e .
```

2. You might need to setup Caiman using `caimanmanager.py`. Please see their docs for details: <https://caiman.readthedocs.io/en/master/Installation.html#installation-on-macos-and-linux>
3. In order to use some features that launch subprocesses, such as the batch manager, you will need to check your *System Configuration settings in Mesmerize* to make sure that it activates the environment that mesmerize is installed in. By default the pre-run commands contain `# source /<path_to_env>/activate'`, you will need to uncomment the line (remove the `#`) and set the path to your environment.

---

**Note:** Caiman=>1.8.9 requires tensorflow v2, which is currently not supported by nuset. If you want to use the latest version of caiman, you will need to install tensorflow v2 and use python3.8

---

### 1.2.3 Mac OSX

This requires Anaconda and will install Mesmerize in an Anaconda environment. If you want to install into a python virtual environment use the instructions for the Linux installation from step #3 onward. Tested on macOS Catalina 10.15.1

Download Anaconda for Python 3: <https://www.anaconda.com/distribution/>

First make sure you have xcode:

```
xcode-select --install
```

This might take a while.

#### Create an environment & install Mesmerize

1. Create a new environment using python 3.6:

```
conda create --name mesmerize python=3.6
```

2. Enter the environment:

```
source activate mesmerize
```

3. Install caiman for Caiman features:

```
conda install -c conda-forge caiman
```

4. Install Mesmerize. On Mac installing tslearn before mesmerize creates problems on anaconda for some reason:

```
pip install mesmerize
```

5. Install cython, and downgrade pandas:

```
conda install Cython pandas~=0.25.3
```

6. Install tslearn~=0.4.1:

```
conda install -c conda-forge tslearn=0.4.1
```

7. Install bottleneck (optional):

```
pip install bottleneck==1.2.1
```

8. To launch Mesmerize call it from the terminal:

```
mesmerize
```

You will always need to activate the environment for Mesmerize before launching it.

#### You might get a matplotlib error similar to below:

```
Bad val 'qt5' on line #1
"backend: qt5

in file "/Users/kushal/.matplotlib/matplotlibrc"
Key backend: Unrecognized backend string 'qt5': valid strings are ['GTK3Agg', 'GTK3Cairo',
→ ', 'MacOSX', 'nbAgg', 'Qt4Agg', 'Qt4Cairo', 'Qt5Agg', 'Qt5Cairo', 'TkAgg', 'TkCairo',
→ 'WebAgg', 'WX', 'WXAgg', 'WXCairo', 'agg', 'cairo', 'pdf', 'pgf', 'ps', 'svg',
→ 'template']
```

(continues on next page)

---

To fix this, execute the following which appends the default matplotlib backend-option. Note that this will probably affect matplotlib in all your environments:

```
echo "backend: qt5" >> ~/.matplotlib/matplotlibrc
```

You might need to setup Caiman using `caimanmanager.py`. Please see their docs for details: <https://caiman.readthedocs.io/en/master/Installation.html#installation-on-macos-and-linux>

In order to use some features that launch subprocesses, such as the batch manager, you will need to check your *System Configuration settings in Mesmerize* to make sure that it activates the environment that mesmerize is installed in.

## 1.2.4 Windows

Tested on Windows 10, not sure if it'll work on earlier Windows versions.

Download & install Anaconda for Python 3: <https://www.anaconda.com/distribution/>

**Make sure you select the option to add anaconda to the PATH environment variable during installation.**

You will also need git: <https://gitforwindows.org/>

**Warning:** It is **highly** recommended that you use Mesmerize in a new dedicated environment, even if you already have major dependencies (like caiman) installed in another environment.

### All commands are to be run in the powershell

1. You will need anaconda to be accessible through powershell. You may need to run powershell as administrator for this step to work. Close & open a new non-admin powershell after running this:

```
conda init powershell
```

You will need a relatively recent version of Anaconda in order to run conda commands through the powershell.

1. Create a new anaconda environment:

```
conda create -n mesmerize python=3.6
```

2. Activate the environment:

```
conda activate mesmerize
```

3. Install caiman:

```
conda install -c conda-forge caiman
```

4. Downgrade pandas, install Cython:

```
conda install Cython pandas~=0.25.3
```

5. Install tslearn (optional):

```
conda install -c conda-forge tslearn=0.4.1
```

6. Install bottleneck (optional):

```
pip install bottleneck==1.2.1
```

7. Install graphviz:

```
conda install graphviz
```

8. Install pywin32:

```
pip install pywin32
```

9. Install Mesmerize:

```
pip install mesmerize
```

10. Allow powershell to execute scripts. Run powershell as administrator to execute these commands. This is required for the batch manager and k-Shape GUI which launch external processes. This may affect the security of your system by allowing scripts to be executable. I'm not an expert on Windows so if someone knows a better way to do this let me know! As far as I know, I'm not sure why you would try to execute untrusted scripts so this shouldn't be a concern?:

```
Set-ExecutionPolicy RemoteSigned  
Set-ExecutionPolicy Bypass -scope Process -Force
```

11. Launch Mesmerize:

```
mesmerize
```

You might need to setup Caiman using `caimanmanager.py`. Please see their docs for details: <https://caiman.readthedocs.io/en/master/Installation.html#installation-on-macos-and-linux>

---

**Note:** In order to use some features, such as the batch manager, you will need to check your *System Configuration settings in Mesmerize* to make sure that it activates the conda environment that mesmerize is installed in. By default the pre-run commands contain `# conda activate mesmerize` but you will need to uncomment the line (remove the `#`) or change it if you are using an environment with a different name.

---

## 1.2.5 From GitHub (Development)

First, make sure you have compilers & python3.6 (see the details above for various Linux distros or Mac OSX)

1. Create a virtual environment:

```
# Choose a path to house the virtual environment  
python3.6 -m venv /path/to/venv
```

2. Activate the virtual environment:

```
source /path/to/venv/bin/activate
```

3. Upgrade pip & setuptools & install some build dependencies:

```
pip install --upgrade pip setuptools  
pip install Cython numpy
```

4. Install tensorflow or tensorflow-gpu, you must use version ~1.15:

```
pip install tensorflow~=1.15
```

5. Install tslearn (required) & bottleneck (optional):

```
pip install tslearn~=0.4.1 bottleneck==1.2.1
```

6. If you want Caiman features you'll need to install caiman into the same environment as mesmerize:

```
git clone https://github.com/flatironinstitute/CaImAn
cd CaImAn/
source <new_venv_path/bin/activate>
pip install -e .
```

7. You might need to setup Caiman using caimanmanager.py. Please see their docs for details: <https://caiman.readthedocs.io/en/master/Installation.html#installation-on-macos-and-linux>

8. Fork the main repo on github and clone it, or install from our repo:

```
git clone https://github.com/kushalkolar/MESmerize.git
# or your own fork
# git clone https://github.com/<your_github_username>/MESmerize.git
cd MESmerize
```

9. Switch to new branch:

```
git checkout -b my-new-feature
```

10. Install in editable mode:

```
pip install -e .
```

11. Make your changes to the code & push to your fork:

```
git push origin my-new-feature
```

12. Create a pull request if you want to incorporate it into the main Mesmerize repo.

## 1.3 Getting Help

If you have questions, encounter an issue, or need help:

- **Post an issue on GitHub:** <https://github.com/kushalkolar/MESmerize/issues>

Please provide all the details that the issue template asks for.

- **Contact us on gitter (for smaller questions or for discussion).** [https://gitter.im/mesmerize\\_discussion/community](https://gitter.im/mesmerize_discussion/community)

Please use the GitHub issue tracker for actual issues, error messages/tracebacks etc. Do not post large error messages/tracebacks in the gitter room, it gets very messy it's harder for us to help you.

## 1.4 FAQs

### 1.4.1 ROIs

1. **Can I delete an ROI?**

- See *ROI Manager guide*

2. **I don't want to delete ROIs but I want to mark them for exclusion in further analysis, how can I do this?**

- You can do this by creating an ROI type category. See [<link here> Add New ROI Type Later](#) which uses this as an example. You can also create this ROI Type category when you create a New Project, not necessarily when you already have a project as the example uses.

3. **Can I tag more than one piece of information to each ROI?**

- Yes, add as many ROI Type categories as you want in the Project Configuration.

**See also:**

*Project Configuration*

4. **I already have a Mesmerize project with many Samples in it. Can I add a new ROI Type category?**

- Yes, just add it to your *Project Configuration*

5. **Can some samples in my project have ROIs that originate from CNMF(E) and others that are manually drawn?**

- Yes, but be aware that you may need to separate the CNMF(E) and manual data in downstream analysis if using flowchart nodes that work with data from specific sources.

### 1.4.2 CNMFE

1. **I have ROIs that clearly encompass multiple cells instead of just one**

- Increase `min_coor`
- Might help to reduce `gSig` as well

2. **I have too many bad ROIs around random regions that are clearly noise**

- Increase `min_pnr`

3. **Min\_PNR image is completely blue and void of any signals**

- Increase `gSig`

4. **Vmin slider is stuck in Inspect Correlation & PNR GUI.**

- Close and reopen it. This is a matplotlib issue, not something I can fix.

### 1.4.3 Caiman Motion Correction

#### 1. I have video tearing

- Try increasing *upsample grid*
- It's possible that the movement is too severe to be motion corrected. When the movement is so severe that the information do not exist, it is impossible to motion correct it.

#### 2. My animal is growing

- This is growth, not motion. Unfortunately cannot be corrected for. If you have an idea for a technique I can try it out.

#### 3. The output actually has more motion, it has created false motion.

- **Try these things:**
  - Reduce *Strides & Overlaps* by ~25%
  - Reduce *max shifts X & Y* by ~25%
  - Reduce *max deviation from rigid* by ~25%

### 1.4.4 Project Organization

#### 1. Can I modify a sample?

- Yes. Double click the Sample ID in the Project Browser to open it in a viewer. You can then make any modifications you want and then go to File -> Add to Project and select the “Save Changes (overwrite)” option at the bottom. If you have not changed the image sequence itself you can uncheck “Overwrite image data”.

#### 2. Can I change the SampleID?

- No this is fundamentally impossible.
- A work-around is to open that Sample in the viewer (double click it in the project browser), make any modifications if necessary, then go to File -> Add to Project, enter the the information for this sample and a new Animal ID (and Trial ID if wanted), and then select the option “Add to Project Dataframe” at the bottom and click Proceed. This will now add a new Sample to the project with this Sample ID. You can then delete the previous Sample.

#### 3. Can I add a new Custom Column, ROI Column, or Stimulus Column to my project when I already have samples in my pr

- Yes, just modify your *Project Configuration*. In the Welcome Window go to Configure -> Project Configuration. Add anything that you want, and then click “Save and Apply”. **It's best to immediately restart Mesmerize whenever you change your project configuration.**
- If you are adding a new Custom Column you can enter a “Dataframe replace value”. This will allow you to set a value for all existing Samples in your project for this new column.
- If you do not set a Dataframe replace value it will label all existing as “untagged”

## 1.5 Citation guide

Mesmerize provides interfaces to many great tools that were created by other developers. Please cite the papers for the following Viewer Modules and analysis methods that you use in addition to citing Mesmerize. I would also suggest citing numpy, pandas, scipy, sklearn, and matplotlib.

Mesmerize relies heavily on `pyqtgraph` widgets. Citing `pyqtgraph`.





## 1.5.1 Viewer

| Module                          | Cite                                                                                                                                                                                                                                                                                                                                                                                                                                                                                                                                                                                                                                                                                                                                                                                                                                                                                                                                                                                                                               |
|---------------------------------|------------------------------------------------------------------------------------------------------------------------------------------------------------------------------------------------------------------------------------------------------------------------------------------------------------------------------------------------------------------------------------------------------------------------------------------------------------------------------------------------------------------------------------------------------------------------------------------------------------------------------------------------------------------------------------------------------------------------------------------------------------------------------------------------------------------------------------------------------------------------------------------------------------------------------------------------------------------------------------------------------------------------------------|
| <i>CNMF</i>                     | <p>Giovannucci A., Friedrich J., Gunn P., Kalfon J., Brown, B., Koay S.A., Taxidis J., Najafi F., Gauthier J.L., Zhou P., Baljit, K.S., Tank D.W., Chklovskii D.B., Pnevmatikakis E.A. (2019). CaImAn: An open source tool for scalable Calcium Imaging data Analysis. eLife 8, e38173. <a href="https://elifesciences.org/articles/38173">https://elifesciences.org/articles/38173</a></p> <p>Pnevmatikakis, E.A., Soudry, D., Gao, Y., Machado, T., Merel, J., ... &amp; Paninski, L. (2016). Simultaneous denoising, deconvolution, and demixing of calcium imaging data. Neuron 89(2):285-299. <a href="http://dx.doi.org/10.1016/j.neuron.2015.11.037">http://dx.doi.org/10.1016/j.neuron.2015.11.037</a></p> <p>Pnevmatikakis, E.A., Gao, Y., Soudry, D., Pfau, D., Lacefield, C., ... &amp; Paninski, L. (2014). A structured matrix factorization framework for large scale calcium imaging data analysis. arXiv preprint arXiv:1409.2903. <a href="http://arxiv.org/abs/1409.2903">http://arxiv.org/abs/1409.2903</a></p> |
| <i>CNMF-E</i>                   | <p>In addition to the above CNMF papers:</p> <p>Zhou, P., Resendez, S. L., Rodriguez-Romaguera, J., Jimenez, J. C., Neufeld, S. Q., Giovannucci, A., ... Paninski, L. (2018). Efficient and accurate extraction of in vivo calcium signals from microendoscopic video data. ELife, 7. doi: <a href="https://doi.org/10.7554/eLife.28728.001">https://doi.org/10.7554/eLife.28728.001</a></p>                                                                                                                                                                                                                                                                                                                                                                                                                                                                                                                                                                                                                                       |
| <i>Caiman Motion Correction</i> | <p>Giovannucci A., Friedrich J., Gunn P., Kalfon J., Brown, B., Koay S.A., Taxidis J., Najafi F., Gauthier J.L., Zhou P., Baljit, K.S., Tank D.W., Chklovskii D.B., Pnevmatikakis E.A. (2019). CaImAn: An open source tool for scalable Calcium Imaging data Analysis. eLife 8, e38173. <a href="https://elifesciences.org/articles/38173">https://elifesciences.org/articles/38173</a></p> <p>Pnevmatikakis, E.A., and Giovannucci A. (2017). NoRMCorre: An online algorithm for piecewise rigid motion correction of calcium imaging data. Journal of Neuroscience Methods, 291:83-92. <a href="https://doi.org/10.1016/j.jneumeth.2017.07.031">https://doi.org/10.1016/j.jneumeth.2017.07.031</a></p>                                                                                                                                                                                                                                                                                                                           |
| Nuset Segmentation              | <p>Yang L, Ghosh RP, Franklin JM, Chen S, You C, Narayan RR, et al. (2020) NuSeT: A deep learning tool for reliably separating and analyzing crowded cells. PLoS Comput Biol 16(9): e1008193. <a href="https://doi.org/10.1371/journal.pcbi.1008193">https://doi.org/10.1371/journal.pcbi.1008193</a></p>                                                                                                                                                                                                                                                                                                                                                                                                                                                                                                                                                                                                                                                                                                                          |

## 1.5.2 Nodes/Analysis

| Node/Method               | Cite                                                                                                                                                                                                                                                                                                                                                                                                                                                                                                                                                                                                   |
|---------------------------|--------------------------------------------------------------------------------------------------------------------------------------------------------------------------------------------------------------------------------------------------------------------------------------------------------------------------------------------------------------------------------------------------------------------------------------------------------------------------------------------------------------------------------------------------------------------------------------------------------|
| <i>k-Shape clustering</i> | <p>Paparrizos, J., &amp; Gravano, L. (2016). k-Shape. ACM SIGMOD Record, 45(1), 69–76. doi: <a href="http://dx.doi.org/10.1145/2723372.2737793">http://dx.doi.org/10.1145/2723372.2737793</a></p> <p>Romain Tavenard, Johann Faouzi, Gilles Vandewiele and Felix Divo, Guillaume Androz, Chester Holtz, Marie Payne, Roman Yurchak, Marc Ruwurm, Kushal Kolar, &amp; Eli Woods. (2017). Tslern, A Machine Learning Toolkit for Time Series Data. Journal of Machine Learning Research, (118):16, 2020. <a href="http://jmlr.org/papers/v21/20-091.html">http://jmlr.org/papers/v21/20-091.html</a></p> |
| <i>Cross-correlation</i>  | <p>Romain Tavenard, Johann Faouzi, Gilles Vandewiele and Felix Divo, Guillaume Androz, Chester Holtz, Marie Payne, Roman Yurchak, Marc Ruwurm, Kushal Kolar, &amp; Eli Woods. (2017). Tslern, A Machine Learning Toolkit for Time Series Data. Journal of Machine Learning Research, (118):16, 2020. <a href="http://jmlr.org/papers/v21/20-091.html">http://jmlr.org/papers/v21/20-091.html</a></p>                                                                                                                                                                                                   |
| <i>TVDiff Node</i>        | <p>Rick Chartrand, “Numerical Differentiation of Noisy, Nonsmooth Data,” ISRN Applied Mathematics, vol. 2011, Article ID 164564, 11 pages, 2011. <a href="https://doi.org/10.5402/2011/164564">https://doi.org/10.5402/2011/164564</a>.</p>                                                                                                                                                                                                                                                                                                                                                            |

### 1.5.3 Scientific Libraries

| Library    |                                                                                                                                                                                                                                                 |
|------------|-------------------------------------------------------------------------------------------------------------------------------------------------------------------------------------------------------------------------------------------------|
| numpy      | Van Der Walt, S., Colbert, S. C. & Varoquaux, G. The NumPy array: A structure for efficient numerical computation. Comput. Sci. Eng. (2011)<br>doi:10.1109/MCSE.2011.37                                                                         |
| pandas     | McKinney, W. Data Structures for Statistical Computing in Python. Proc. 9th Python Sci. Conf. (2010)                                                                                                                                            |
| scipy      | Virtanen, P., Gommers, R., Oliphant, T.E. et al. SciPy 1.0: fundamental algorithms for scientific computing in Python. Nat Methods (2020).<br><a href="https://doi.org/10.1038/s41592-019-0686-2">https://doi.org/10.1038/s41592-019-0686-2</a> |
| sklearn    | Pedregosa, F. et al. Scikit-learn: Machine learning in Python. J. Mach. Learn. Res. (2011)                                                                                                                                                      |
| matplotlib | Hunter, J. D. Matplotlib: A 2D graphics environment. Comput. Sci. Eng. (2007)                                                                                                                                                                   |
| pyqtgraph  | <a href="http://www.pyqtgraph.org/">http://www.pyqtgraph.org/</a>                                                                                                                                                                               |

## 1.6 Create a New Project

### 1.6.1 Video Tutorial

This tutorial shows how to create a New Project, open images in the Viewer, use the Stimulus Mapping module and perform Caiman motion correction

## 1.6.2 Biological Questions

Before you create a new Mesmerize Project you must thoroughly think about the biological questions that you are interested in. Here are some thoughts to help you:

- The effects of different types of temporary stimulation? Such as poking or odors?
  - Are you interested in neuronal activity during specific behavioral periods?
  - Differences in calcium dynamics between different anatomical regions?
  - Chemogenetic experiments using transgenes to express DDREADs.
  - Non-temporary effects of drugs (for example, if the animal is bathed in drug for longer recordings).
    - For example, if you are inducing seizures with PTZ, where you are interested in the differences between a control recording of 5 minutes and subsequent 5 minute recordings where the animal is bathed in PTZ (or whatever duration you determine is biologically meaningful). You could also be interested in a recovery stage to see what happens to the calcium dynamics when you “perfuse-back” the liquid medium (such as seawater, steinberg’s solution etc.) without the drug.
  - Differences in calcium dynamics between different stages during development
  - Differences in calcium dynamics between different cell types using GCaMP driven by specific promoters.
- 

## 1.6.3 New Project

To create a new project click **New Project** in the *Welcome Window*. You will then be prompted to choose a location and a name for the project. This will create a directory with the chosen name in the location you previously selected.

## 1.6.4 Project Configuration

After setting a project name you must configure it. This is where your biological questions of interest are important. You can change your project configuration later, but it is most time efficient if you enter all your categories of interest now.

The screenshot shows the 'Columns' configuration window. It has a title bar with standard window controls. The main area is divided into several sections:

- Include in Project Browser View:** A list box containing 'SampleID', 'date', and 'comments'.
- Exclude in Project Browser View:** A list box containing 'CurvePath', 'ImgInfoPath', 'ImgPath', 'MaxProjPath', 'ROI\_State', 'uuid\_curve', and 'misc'.
- ROI Type Columns:** An empty list box.
- Stimulus Type Columns:** An empty list box.
- Custom Columns:** An empty list box.
- Add new custom column:** A section with a text input for 'Column name', a 'Choose data type:' label, four radio button options: 'standard text (str)', 'whole numbers (np.int64)', 'decimal numbers (np.float64)', and 'boolean (True/False values)', and a text input for 'Dataframe replacement value'.

Buttons for 'Add', 'Close', and 'Save and apply' are located at the bottom of the dialog.

**Warning:** Restart Mesmerize whenever you change the project configuration.

**Note:** If you have Samples in your project and you change the project configuration at a later date to add new columns, all existing rows in your project DataFrame are labelled as “untagged” for the new columns.

**See also:**

*Add To Project Guide* to understand how the project configuration relates to the addition of data samples to your project

## Categorical Data Columns

Mesmerize allows you to create three main different types of categorical data columns (for the project `DataFrame`), and an unlimited number of each type. These categorical data columns allow you to group your data during analysis, and therefore perform comparisons between experimental groups. In essence, these categorical data columns form scaffold with which you can create your experimental groups during analysis.

---

**Note:** You can change the project configuration at any point in the future by adding new columns or changing the visible/hidden columns.

---

---

**Note:** It is generally advisable to keep the names of your categorical data columns short with lowercase letters. When sharing your project you can provide a mapping for all your keys. This helps maintain consistency throughout your project and makes the data more readable.

---

## ROI Type Columns

Create ROI-bound *categories* with which you want to group your data. Enter the desired name for the category and click **Add**. Here are some examples:

- If you are interested in calcium dynamics between different anatomical regions, you create a column named `anatomical_region`.
- You want to define defined notochord cell identities on a anterior-posterior axis, defined as “cell\_1”, “cell\_2”, ... “cell\_n”. You can create an ROI Type Column named `notochord_cell_id`.

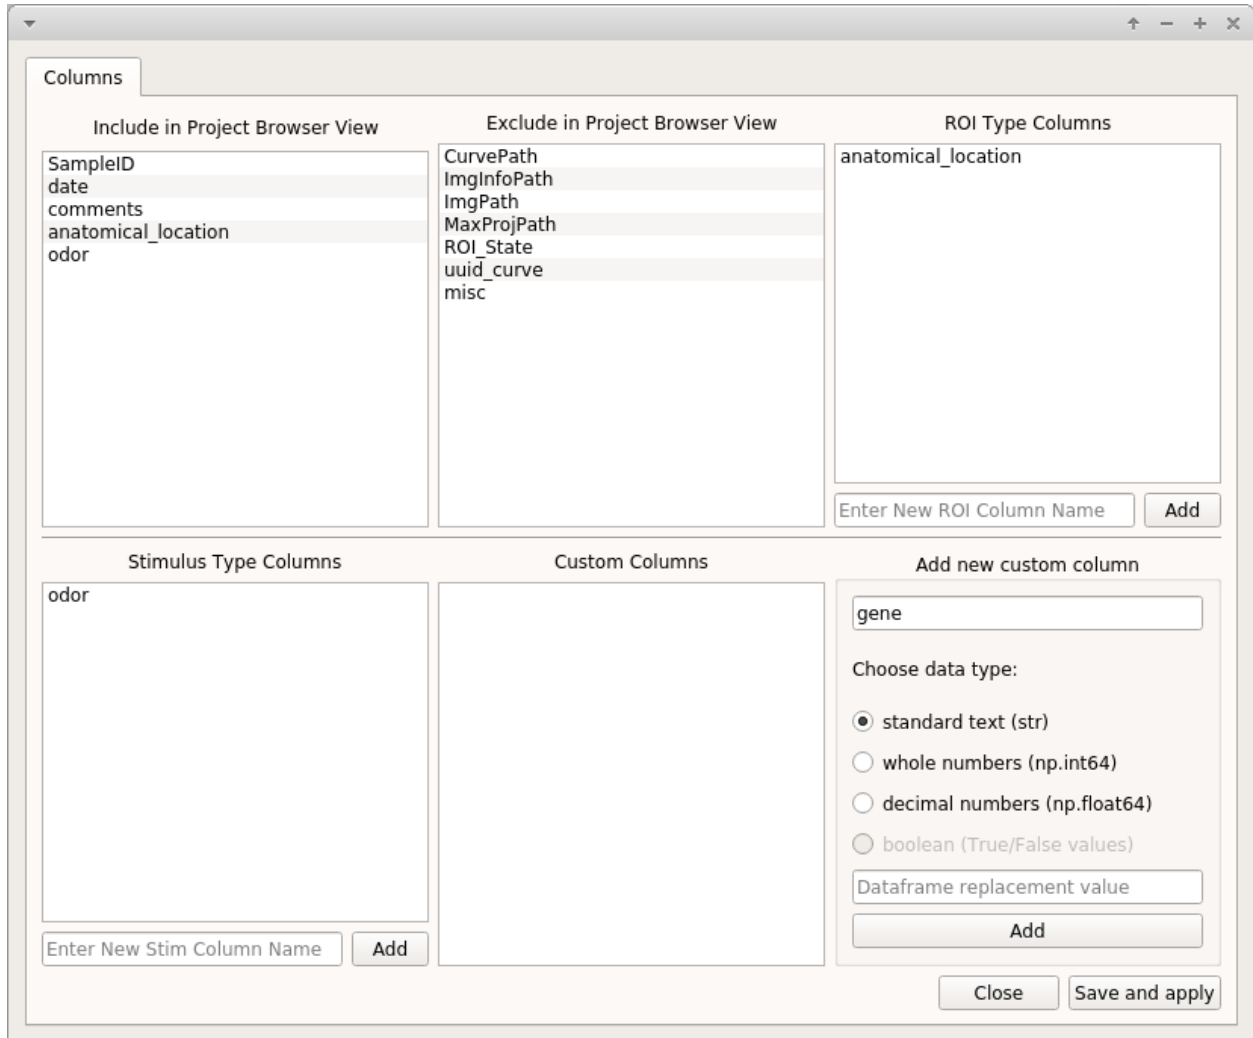**See also:**

[ROI Manager](#) to understand how labels can be tagged onto ROIs using these categories that you have defined in the ROI Type Columns.

**Stimulus Type Columns**

If you're interested in mapping temporal information to your traces, such as stimuli or behavioral periods, add a "Stimulus Type column" for each type. This is only for temporary stimulation or behavioral periods that do not span the entire length of the video.

**See also:**

[<link here> Stimulus Mapping guide, to understand how stimuli can be labelled.](#)



## Custom Columns

Here you can create categories to tag any other piece of useful information to each Sample. i.e. to the entire video recording. For example:

- You are studying seizures, you perform a 5 minute recording in the medium, and then subsequent 5 minute recordings in PTZ. You can create a category called “drug\_state”. When you add samples to your project you can tag drug states named “control”, “ptz\_1”, “ptz\_2”, “ptz\_recovery\_1” etc.
- This is also what you would use for chemogenetics experiments if you are recording for example without CNO for 5 minutes, and then with CNO for another 5 minutes.

Three different data types can be tagged to a category, **standard text**, **whole numbers**, and **decimal numbers**.

**Warning:** Data types cannot be changed later. If you are familiar with pandas you can manually change it, and the corresponding value in the project config file.

If you want to tag numerical information, such as the animal’s development stage, it can be useful to set the data type to **whole numbers**. This allows you to sort your data numerically. For example you may want to compare dynamics of all curves between stage 48 and 72.

The screenshot shows a configuration window for custom columns. It is organized into several panels:

- Include in Project Browser View:** A list of columns to be included, containing SampleID, date, comments, anatomical\_location, odor, and gene.
- Exclude in Project Browser View:** A list of columns to be excluded, containing CurvePath, ImgInfoPath, ImgPath, MaxProjPath, ROI\_State, uuid\_curve, and misc.
- ROI Type Columns:** A list of ROI type columns, containing anatomical\_location.
- Stimulus Type Columns:** A list of stimulus type columns, containing odor.
- Custom Columns:** A list of custom columns, containing gene.
- Add new custom column:** A section for adding a new custom column. It features a text input field with the value "developmental\_stage". Below it, there are radio buttons for choosing a data type: "standard text (str)", "whole numbers (np.int64)", "decimal numbers (np.float64)", and "boolean (True/False values)". The "whole numbers (np.int64)" option is selected. There is also a "Dataframe replacement value" input field and an "Add" button.

At the bottom of the window, there are buttons for "Close" and "Save and apply".

If you are interested in dynamics between different cell types for which you are using specific GCaMP promoters, you can create a custom column called `promoter` or `cell_type` and select **standard text** as the data type.

The screenshot shows the 'Columns' dialog box with the following sections and content:

- Include in Project Browser View:** SampleID, date, comments, anatomical\_location, odor
- Exclude in Project Browser View:** CurvePath, ImgInfoPath, ImgPath, MaxProjPath, ROI\_State, uuid\_curve, misc
- ROI Type Columns:** anatomical\_location
- Stimulus Type Columns:** odor
- Custom Columns:** (Empty)
- Add new custom column:**
  - Text input: gene
  - Choose data type:
    - standard text (str)
    - whole numbers (np.int64)
    - decimal numbers (np.float64)
    - boolean (True/False values)
  - Dataframe replacement value: (Empty)
  - Add button

Buttons at the bottom: Close, Save and apply. Buttons for 'Add' are also present under 'Include in Project Browser View', 'Exclude in Project Browser View', and 'Stimulus Type Columns'.

When you add samples to your project from the viewer, you will be prompted to enter information that is directly based on the Custom Columns that you create here.

**See also:**

*Add to Project guide*

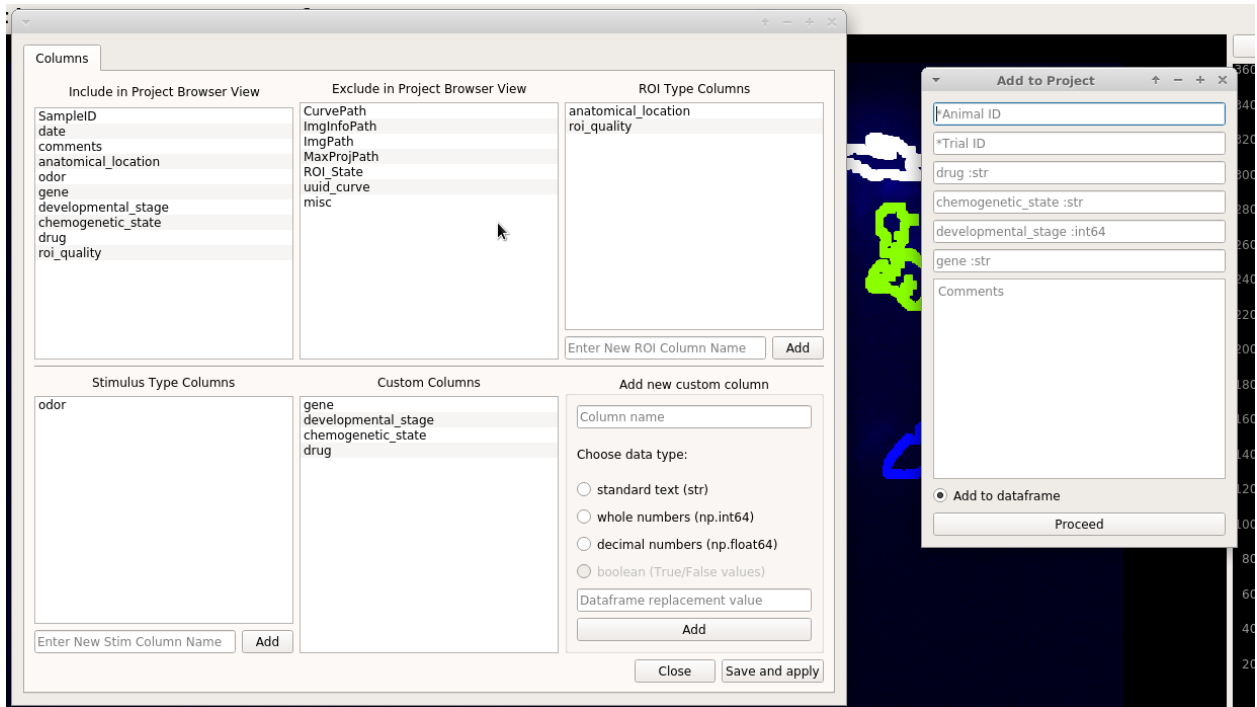

### Visible / Hidden in Project Browser

You can drag and drop items (column names) between these two lists to set which ones are visible in the Project Browser. This is just to avoid clutter.

**See also:**

*Project Browser*

## 1.7 Project Browser

### Browse, edit and sort the project DataFrame

You can open the Project Browser from the *Welcome Window* after you have opened a project.

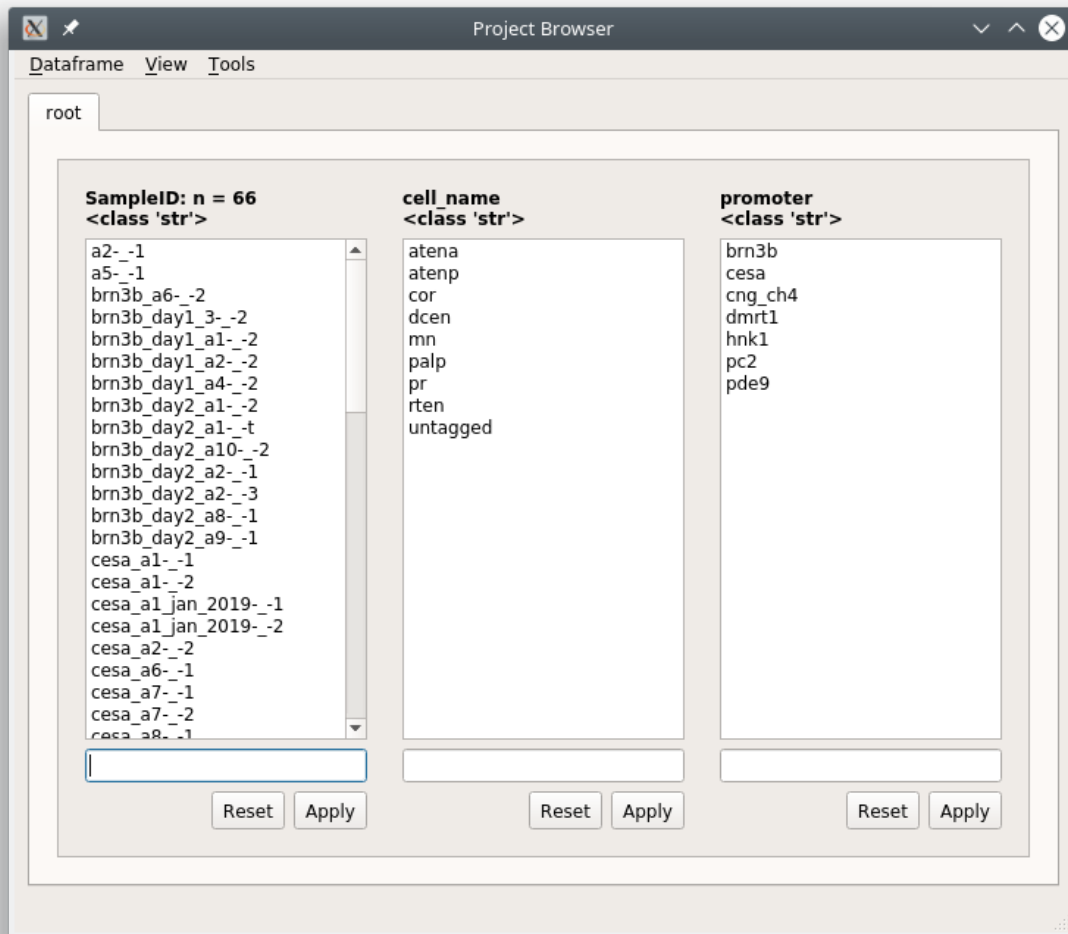

The columns that are visible in the Project Browser Window correspond to the *Project Configuration*. For each column you will see a list which is a set of unique elements from that column in the project DataFrame.

Functions

### 1.7.1 Open Sample

Double-click on a Sample in the *SampleID* column to open it in the *Viewer*.

In the viewer you can make changes and then save it by going to File -> Add to Project. You will see a “Save changes (overwrite)” option which will overwrite the data for this project Sample with the current data in the viewer work environment. If you have not changed the image sequence data you can uncheck the “Overwrite image data” checkbox, useful if your image sequences are large.

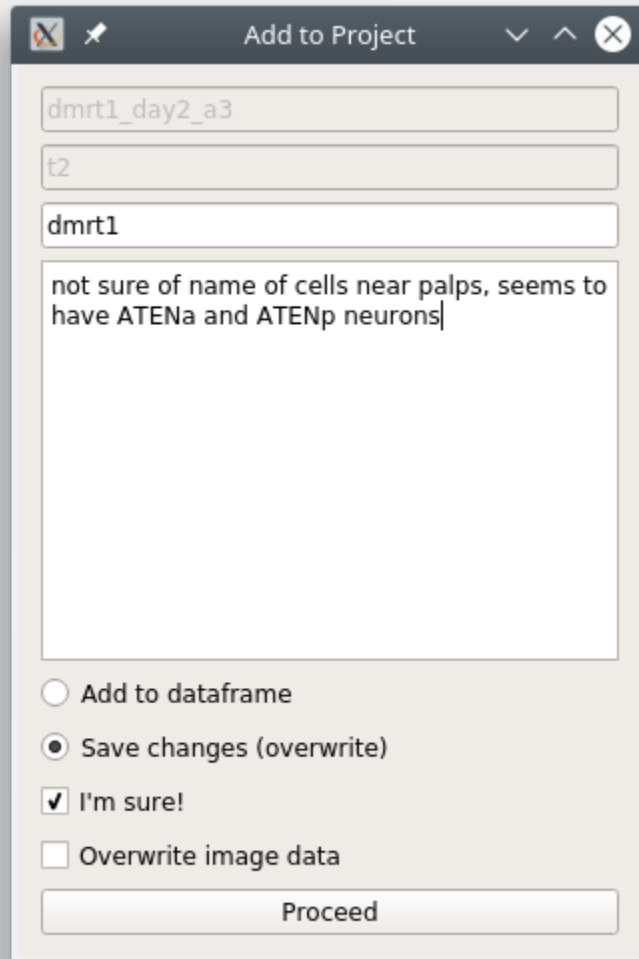

---

**Note:** You can make any changes that you want to the Sample. This may include things such as changing or adding new tags to ROIs, changing stimulus maps, tagging a new custom column etc.

---

**Warning:** You can never change the AnimalID or TrialID (i.e. SampleID) since these are partially used as unique identifiers. A workaround is described in the [FAQ for Project Organization](#).

## 1.7.2 Filter

You can sort your Project DataFrame into different groups (such as experimental groups) using text and numerical filters. Type a filter into the text entries that are below the list of elements for a column. You can also click on one or many elements in a column to set those elements as the filters.

If you filter out of the root tab, it will always create a new tab with a name of your choice. If you filter out of any other tab it will apply the filter in-place unless you right click on the “Apply” button and choose “Apply in new tab”

### Text filters

#### Partial match

To filter out a group based on partial text matches just enter the text into the filter text entry below the column(s) of interest and click “Apply”

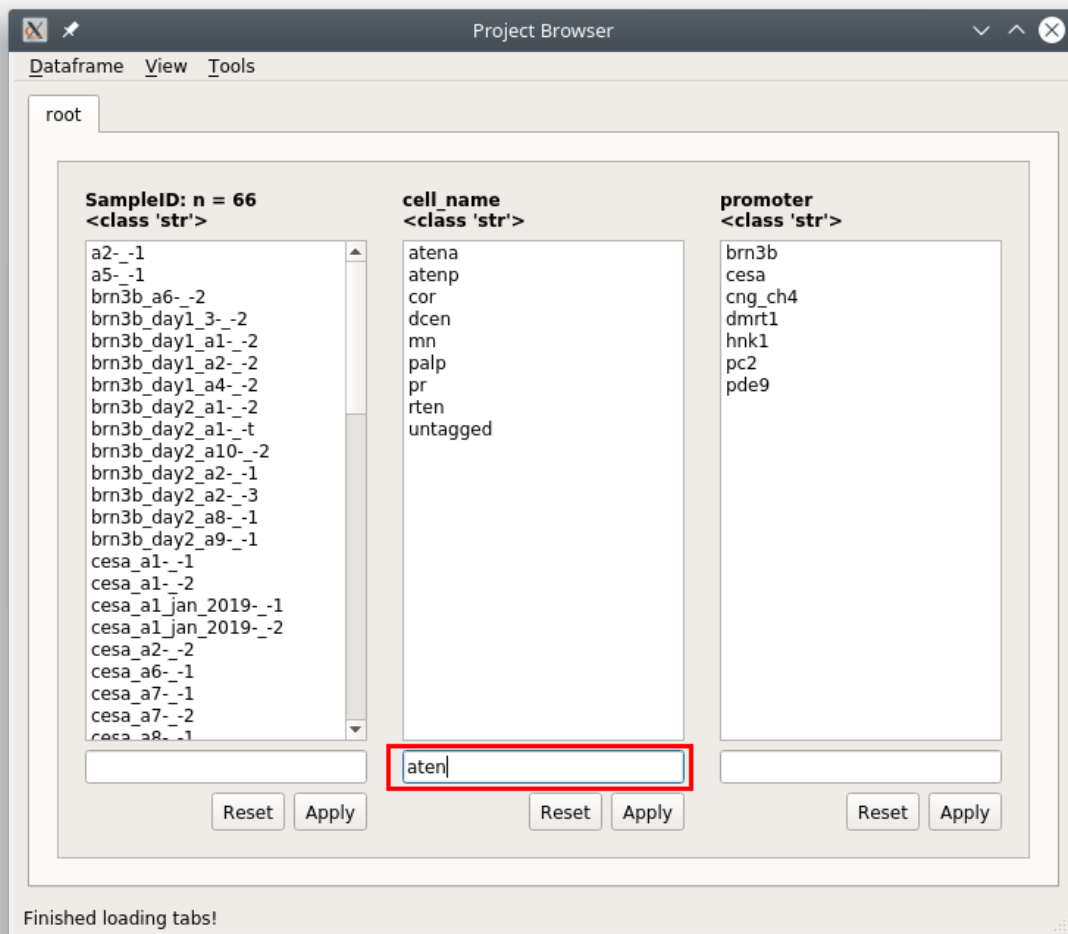

Since this is filtering out of the root tab, you will be prompted to give a name for a new tab that will be created based on the filter you have entered.

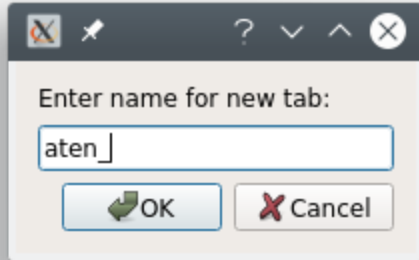

The result is a DataFrame containing all rows where the cell\_name contains 'aten'

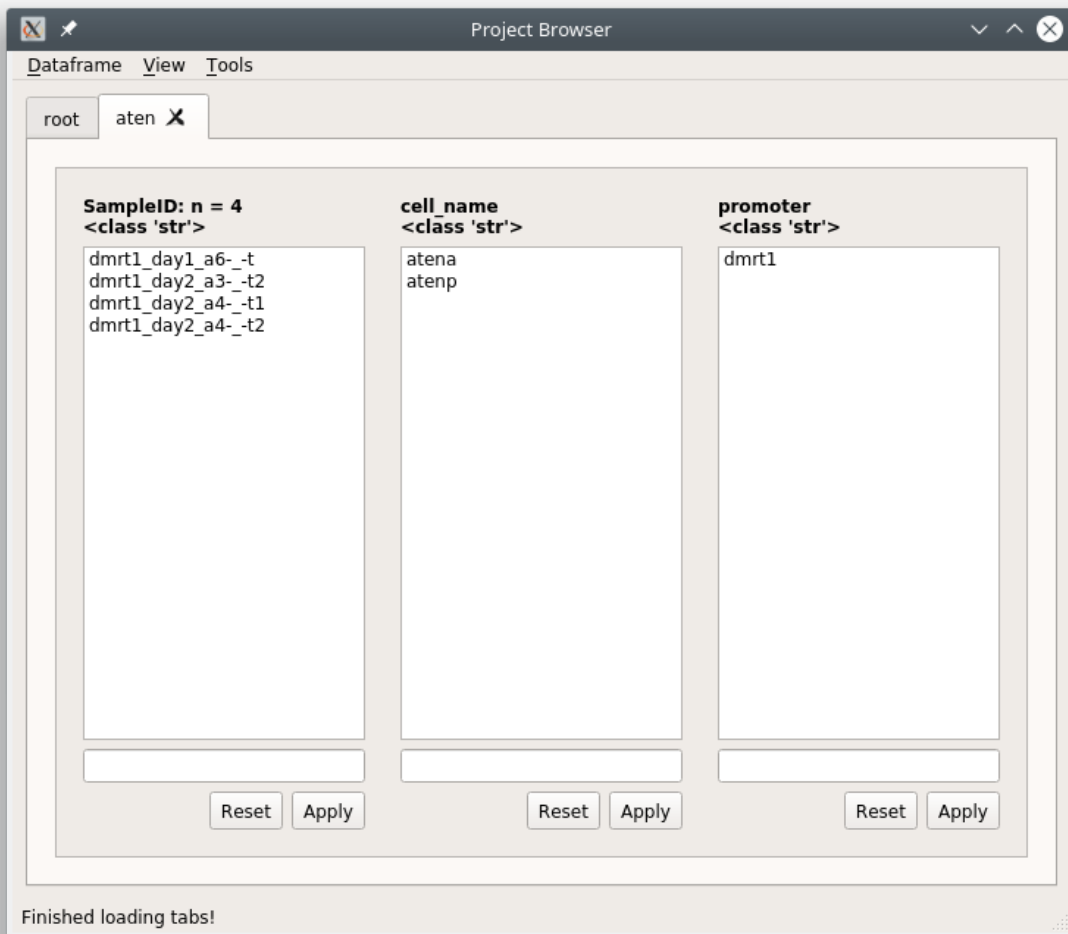

If you go to View -> Current dataframe you can see the whole dataframe.

| Index | CurvePath     | ImgInfoPath   | ImgPath       | ImgUUID       | ROI_State       | SampleID      | anatomical_locati | cell_name | comments      | date          | misc | morphology | promoter | stimulus_name | uuid_curve    |
|-------|---------------|---------------|---------------|---------------|-----------------|---------------|-------------------|-----------|---------------|---------------|------|------------|----------|---------------|---------------|
| 2     | curves/dnr... | images/dnr... | images/dnr... | 1b2b1436-0... | {'roi_xs': :... | dnrt1_day2... | sv                | atena     | not sure o... | 20190427_0... | ()   | untagged   | dnrt1    | ['untagged... | a58b74ab-d... |
| 3     | curves/dnr... | images/dnr... | images/dnr... | 1b2b1436-0... | {'roi_xs': :... | dnrt1_day2... | sv                | atena     | not sure o... | 20190427_0... | ()   | untagged   | dnrt1    | ['untagged... | fd2a224f-2... |
| 4     | curves/dnr... | images/dnr... | images/dnr... | 1b2b1436-0... | {'roi_xs': :... | dnrt1_day2... | sv                | atena     | not sure o... | 20190427_0... | ()   | untagged   | dnrt1    | ['untagged... | 8e861cf8-7... |
| 5     | curves/dnr... | images/dnr... | images/dnr... | 1b2b1436-0... | {'roi_xs': :... | dnrt1_day2... | sv                | atena     | not sure o... | 20190427_0... | ()   | untagged   | dnrt1    | ['untagged... | 7b389637-6... |
| 6     | curves/dnr... | images/dnr... | images/dnr... | 1b2b1436-0... | {'roi_xs': :... | dnrt1_day2... | sv                | atena     | not sure o... | 20190427_0... | ()   | untagged   | dnrt1    | ['untagged... | a6c90334-5... |
| 7     | curves/dnr... | images/dnr... | images/dnr... | 1b2b1436-0... | {'roi_xs': :... | dnrt1_day2... | sv                | atemp     | not sure o... | 20190427_0... | ()   | untagged   | dnrt1    | ['untagged... | da3153dd-7... |
| 8     | curves/dnr... | images/dnr... | images/dnr... | 1b2b1436-0... | {'roi_xs': :... | dnrt1_day2... | sv                | atemp     | not sure o... | 20190427_0... | ()   | untagged   | dnrt1    | ['untagged... | c7016d72-9... |
| 9     | curves/dnr... | images/dnr... | images/dnr... | 1b2b1436-0... | {'roi_xs': :... | dnrt1_day2... | sv                | atemp     | not sure o... | 20190427_0... | ()   | untagged   | dnrt1    | ['untagged... | 479e6db2-5... |
| 10    | curves/dnr... | images/dnr... | images/dnr... | 1b2b1436-0... | {'roi_xs': :... | dnrt1_day2... | sv                | atemp     | not sure o... | 20190427_0... | ()   | untagged   | dnrt1    | ['untagged... | 9dca9b52-6... |
| 165   | curves/dnr... | images/dnr... | images/dnr... | f0cbb84e-9... | {'roi_xs': :... | dnrt1_day2... | mg                | atemp     | not sure o... | 20190427_0... | ()   | untagged   | dnrt1    | ['untagged... | 415a955d-1... |
| 266   | curves/dnr... | images/dnr... | images/dnr... | 73d208f4-1... | {'roi_xs': :... | dnrt1_day2... | mg                | atemp     | no if r...    | 20190427_0... | ()   | untagged   | dnrt1    | ['untagged... | 5ef77df8-c... |
| 205   | curves/dnr... | images/dnr... | images/dnr... | b5f6e926-b... | {'roi_xs': :... | dnrt1_day1... | sv                | atena     | not sure o... | 20190425_1... | ()   | untagged   | dnrt1    | ['untagged... | 4c0f0725-e... |

To see how the filter translates to pandas commands go to View -> Current tab filter history

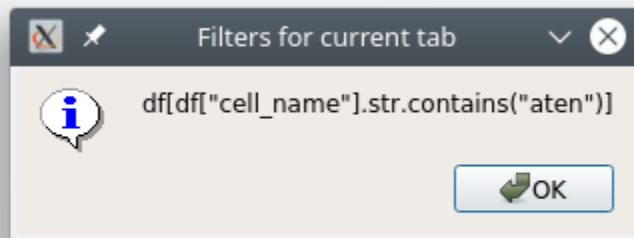

## Multiple filters

You can combine filters together by using the | separator. The | acts as an “or” operator.



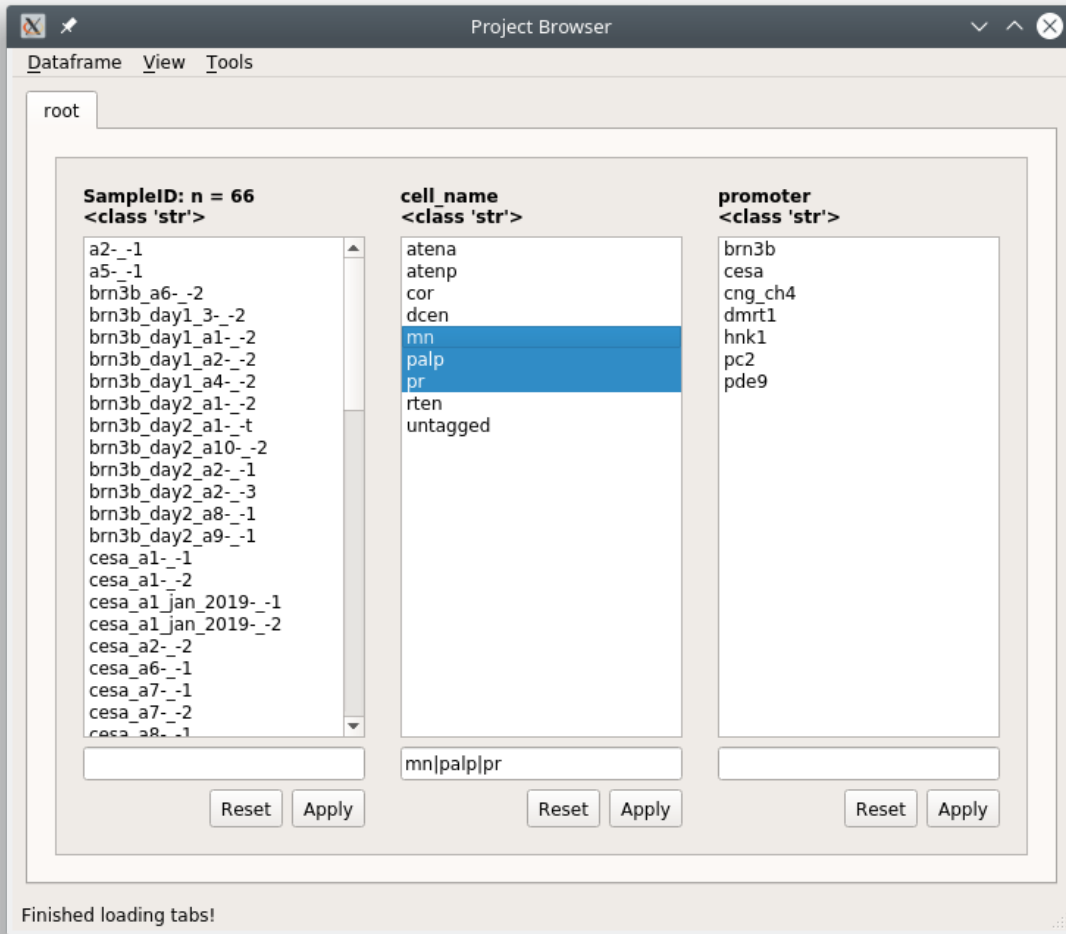

The result is all rows where mn, palp, or pr are in the cell\_name column.

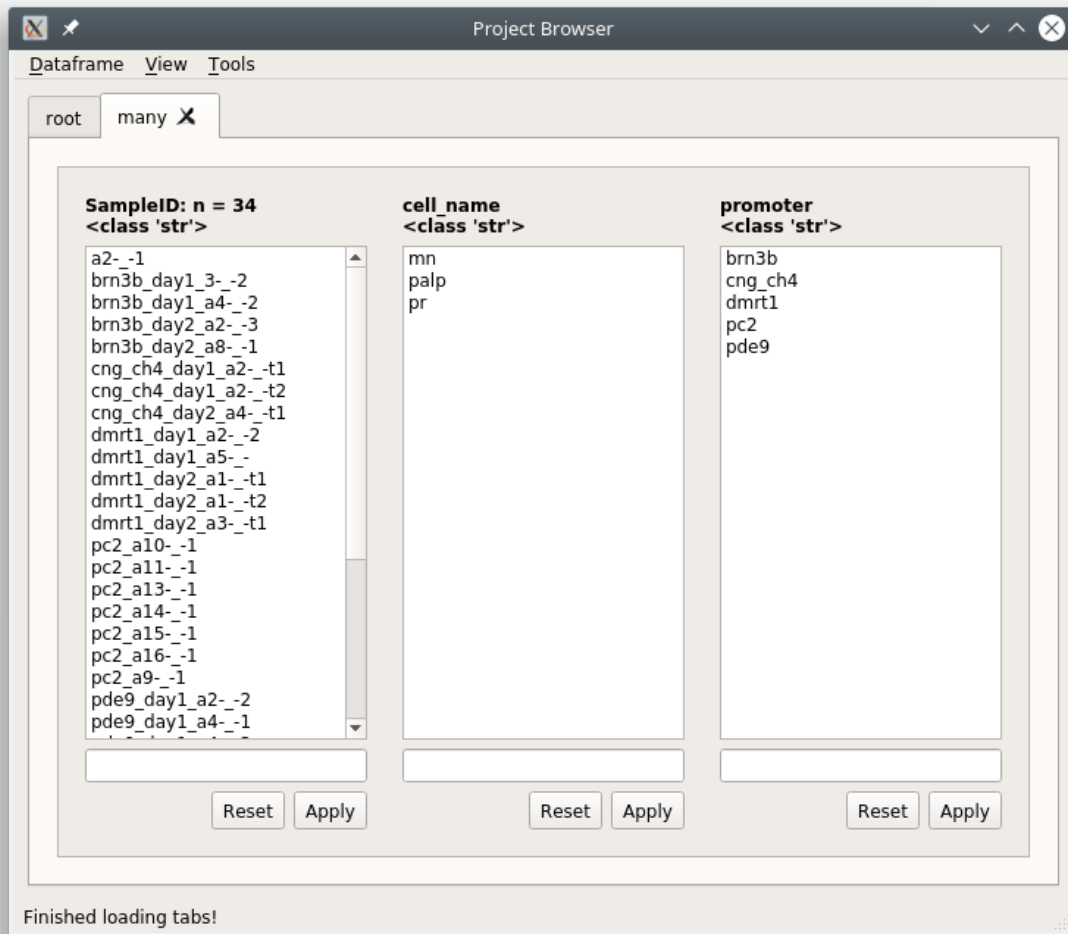

**Note:** This can be combined with *Modifiers*

### Filter multiple columns

You can filter multiple columns simultaneously if you are not in the root tab. You can create a new tab that is essentially the same as the root by just keeping the filter entries blank and clicking “Apply”.

Filter out all rows where the cell\_name column contains ‘pr’ and promoter column contains ‘pc2’ or ‘cng\_ch4’.

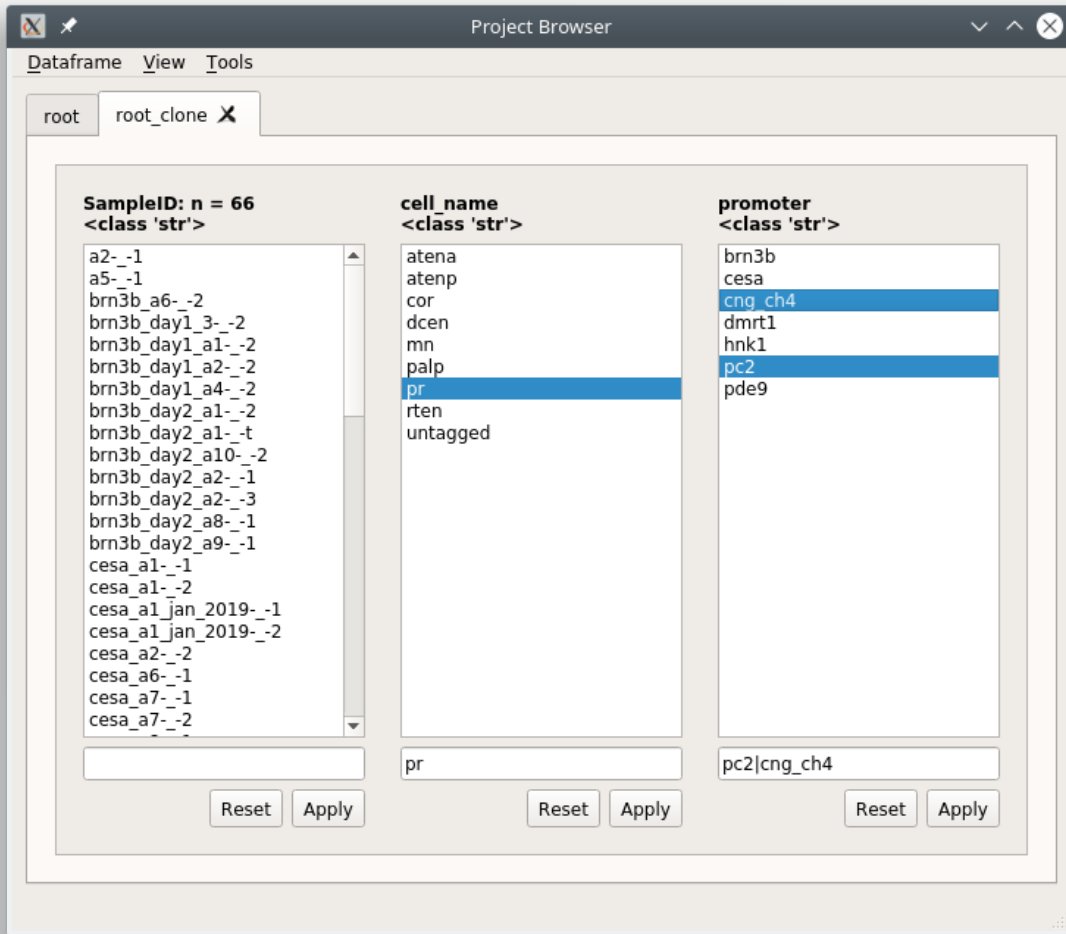

Right click on the “Apply” button and choose “Apply all” or “Apply all in new tab”

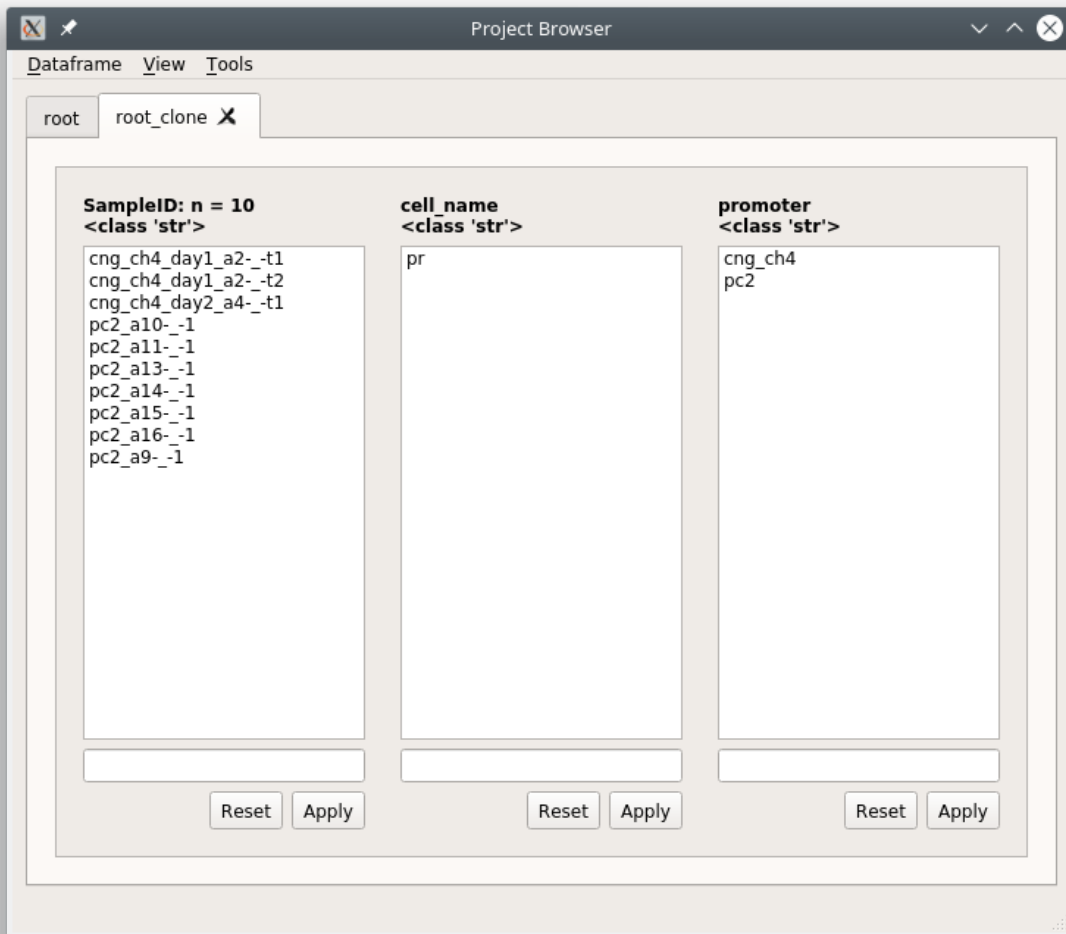

If you view the pandas filter history (View -> Current tab filter history) you can see that the filters for each column are simply applied sequentially.

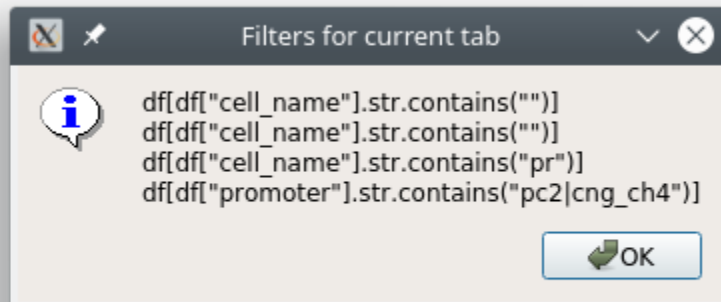

The dataframe

| Index | CurvePath     | ImgInfoPath   | ImgPath       | ImgUUID       | ROI_State     | SampleID      | anatomical_locati | cell_name | comments      | date          | misc | morphology | promoter | stimulus_name | uuid_curve    |
|-------|---------------|---------------|---------------|---------------|---------------|---------------|-------------------|-----------|---------------|---------------|------|------------|----------|---------------|---------------|
| 248   | curves/cng... | images/cng... | images/cng... | ef990b14-7... | {'rot_xs':... | cng_ch4_da... | sv                | pr        | noisy video   | 20190425_1... | {}   | untagged   | cng_ch4  | ['untagged... | 402d9bab-9... |
| 249   | curves/cng... | images/cng... | images/cng... | 7c8970ba-f... | {'rot_xs':... | cng_ch4_da... | sv                | pr        | noisy video   | 20190425_1... | {}   | vase       | cng_ch4  | ['untagged... | 6c37de9f-3... |
| 250   | curves/cng... | images/cng... | images/cng... | 6d36e2b0-0... | {'rot_xs':... | cng_ch4_da... | sv                | pr        | renoved no... | 20190427_0... | {}   | untagged   | cng_ch4  | ['untagged... | 4bb77719-5... |
| 254   | curves/pc2... | images/pc2... | images/pc2... | 5dd74a70-5... | {'rot_xs':... | pc2_a11_-1    | sv                | pr        | Not sure o... | 20180423_1... | {}   | untagged   | pc2      | ['untagged... | b8d3221e-2... |
| 255   | curves/pc2... | images/pc2... | images/pc2... | 5dd74a70-5... | {'rot_xs':... | pc2_a11_-1    | sv                | pr        | Not sure o... | 20180423_1... | {}   | untagged   | pc2      | ['untagged... | 6564f3ca-8... |
| 257   | curves/pc2... | images/pc2... | images/pc2... | 9033911b-f... | {'rot_xs':... | pc2_a9_-1     | sv                | pr        | lots of ne... | 20180423_1... | {}   | untagged   | pc2      | ['untagged... | 19db48bc-9... |
| 259   | curves/pc2... | images/pc2... | images/pc2... | 9033911b-f... | {'rot_xs':... | pc2_a9_-1     | sv                | pr        | lots of ne... | 20180423_1... | {}   | untagged   | pc2      | ['untagged... | 52ce28b6-1... |
| 262   | curves/pc2... | images/pc2... | images/pc2... | 36a0f621-b... | {'rot_xs':... | pc2_a15_-1    | sv                | pr        | unsure of ... | 20180423_2... | {}   | untagged   | pc2      | ['untagged... | 3ab4f3ed-4... |
| 266   | curves/pc2... | images/pc2... | images/pc2... | 674d2504-3... | {'rot_xs':... | pc2_a16_-1    | sv                | pr        | fatter_he...  | 20180424_0... | {}   | untagged   | pc2      | ['untagged... | 8d4d3222-7... |
| 267   | curves/pc2... | images/pc2... | images/pc2... | 674d2504-3... | {'rot_xs':... | pc2_a16_-1    | sv                | pr        | fatter_he...  | 20180424_0... | {}   | untagged   | pc2      | ['untagged... | d8bfe2d0-d... |
| 275   | curves/pc2... | images/pc2... | images/pc2... | 7eab3b7c-8... | {'rot_xs':... | pc2_a10_-1    | sv                | pr        | untagged      | 20180423_1... | {}   | untagged   | pc2      | ['untagged... | 5afe911-9...  |
| 277   | curves/pc2... | images/pc2... | images/pc2... | 7eab3b7c-8... | {'rot_xs':... | pc2_a10_-1    | sv                | pr        | untagged      | 20180423_1... | {}   | untagged   | pc2      | ['untagged... | e402e3d4-8... |
| 281   | curves/pc2... | images/pc2... | images/pc2... | f545735e-6... | {'rot_xs':... | pc2_a14_-1    | sv                | pr        | unsure of ... | 20180423_2... | {}   | untagged   | pc2      | ['untagged... | 6d8445e-2...  |
| 282   | curves/pc2... | images/pc2... | images/pc2... | f545735e-6... | {'rot_xs':... | pc2_a14_-1    | sv                | pr        | unsure of ... | 20180423_2... | {}   | untagged   | pc2      | ['untagged... | 6257c4a7-9... |
| 283   | curves/pc2... | images/pc2... | images/pc2... | f545735e-6... | {'rot_xs':... | pc2_a14_-1    | sv                | pr        | unsure of ... | 20180423_2... | {}   | untagged   | pc2      | ['untagged... | 46d49443-5... |
| 289   | curves/pc2... | images/pc2... | images/pc2... | 2a15b4fc-5... | {'rot_xs':... | pc2_a13_-1    | sv                | pr        | not sure a... | 20180423_2... | {}   | untagged   | pc2      | ['untagged... | 49cad9b0-7... |
| 290   | curves/pc2... | images/pc2... | images/pc2... | 2a15b4fc-5... | {'rot_xs':... | pc2_a13_-1    | sv                | pr        | not sure a... | 20180423_2... | {}   | vase       | pc2      | ['untagged... | a588a2d1-b... |

## Modifiers

You can perform other types of matches, such as exact matches, negations, and exact negations. Enter the filter and then right click on the text entry to see available modifiers and choose the desired modifier.

...

"Not" modifier \$NOT:

"String" modifier \$STR:

"String equals" modifier (exact match of text) \$STR=:

"String not equals" modifier \$STR!=:

| Modifier | Description                                                               |
|----------|---------------------------------------------------------------------------|
| \$NOT:   | Results in the negation of partial matches                                |
| \$STR:   | Treats the filter as a str, same as Partial Match (see above sub-section) |
| \$STR=:  | Exact text match                                                          |
| \$STR!=: | Negation of exact text match                                              |

## Numerical filters

By default the filters in all entires are treated as text. If your column contains numerical data you have additional options for modifiers. The first four modifiers are the *same as explained above*. The rest are self explanatory.

...

"Not" modifier \$NOT:

"String" modifier \$STR:

"String equals" modifier (exact match of text) \$STR=:

"String not equals" modifier \$STR!=:

Greater than

Less than

Less than or equal to

Greater than or equal to

### 1.7.3 Editor

You can view and edit the Project DataFrame directly in a GUI using the DataFrame editor.

DataFrame editor

| Index | CurvePath      | ImgInfoPath    | ImgPath        | MaxProjPath    | ROI_State      | SampleID | comments | date            | promoter | uuid_curve     |
|-------|----------------|----------------|----------------|----------------|----------------|----------|----------|-----------------|----------|----------------|
| 0     | /curves/a2-... | /images/a2-... | /images/a2-... | /share/data... | {'roi_xs': ... | a2_-t1   | untagged | 20181215_024112 | hnk1     | 7bc546b2-24... |
| 1     | /curves/a2-... | /images/a2-... | /images/a2-... | /share/data... | {'roi_xs': ... | a2_-t1   | untagged | 20181215_024112 | hnk1     | 7bc546b2-24... |
| 2     | /curves/a2-... | /images/a2-... | /images/a2-... | /share/data... | {'roi_xs': ... | a2_-t1   | untagged | 20181215_024112 | hnk1     | 7bc546b2-24... |
| 3     | /curves/a2-... | /images/a2-... | /images/a2-... | /share/data... | {'roi_xs': ... | a2_-t1   | untagged | 20181215_024112 | hnk1     | 7bc546b2-24... |
| 4     | /curves/a2-... | /images/a2-... | /images/a2-... | /share/data... | {'roi_xs': ... | a2_-t1   | untagged | 20181215_024112 | hnk1     | 7bc546b2-24... |
| 5     | /curves/a2-... | /images/a2-... | /images/a2-... | /share/data... | {'roi_xs': ... | a2_-t1   | untagged | 20181215_024112 | hnk1     | 7bc546b2-24... |
| 6     | /curves/a2-... | /images/a2-... | /images/a2-... | /share/data... | {'roi_xs': ... | a2_-t1   | untagged | 20181215_024112 | hnk1     | 7bc546b2-24... |
| 7     | /curves/a2-... | /images/a2-... | /images/a2-... | /share/data... | {'roi_xs': ... | a2_-t1   | untagged | 20181215_024112 | hnk1     | 7bc546b2-24... |
| 8     | /curves/a2-... | /images/a2-... | /images/a2-... | /share/data... | {'roi_xs': ... | a2_-t1   | untagged | 20181215_024112 | hnk1     | 7bc546b2-24... |
| 9     | /curves/a2-... | /images/a2-... | /images/a2-... | /share/data... | {'roi_xs': ... | a2_-t1   | untagged | 20181215_024112 | hnk1     | 7bc546b2-24... |
| 10    | /curves/a2-... | /images/a2-... | /images/a2-... | /share/data... | {'roi_xs': ... | a2_-t1   | untagged | 20181215_024112 | hnk1     | 7bc546b2-24... |
| 11    | /curves/a2-... | /images/a2-... | /images/a2-... | /share/data... | {'roi_xs': ... | a2_-t1   | untagged | 20181215_024112 | hnk1     | 7bc546b2-24... |
| 12    | /curves/a2-... | /images/a2-... | /images/a2-... | /share/data... | {'roi_xs': ... | a2_-t1   | untagged | 20181215_024112 | hnk1     | 7bc546b2-24... |
| 13    | /curves/a2-... | /images/a2-... | /images/a2-... | /share/data... | {'roi_xs': ... | a2_-t1   | untagged | 20181215_024112 | hnk1     | 7bc546b2-24... |
| 14    | /curves/a3-... | /images/a3-... | /images/a3-... | /share/data... | {'roi_xs': ... | a3_-t1   | untagged | 20181215_025854 | hnk1     | 20daa65b-d1... |
| 15    | /curves/a3-... | /images/a3-... | /images/a3-... | /share/data... | {'roi_xs': ... | a3_-t1   | untagged | 20181215_025854 | hnk1     | 20daa65b-d1... |
| 16    | /curves/a3-... | /images/a3-... | /images/a3-... | /share/data... | {'roi_xs': ... | a3_-t1   | untagged | 20181215_025854 | hnk1     | 20daa65b-d1... |
| 17    | /curves/a3-... | /images/a3-... | /images/a3-... | /share/data... | {'roi_xs': ... | a3_-t1   | untagged | 20181215_025854 | hnk1     | 20daa65b-d1... |
| 18    | /curves/a3-... | /images/a3-... | /images/a3-... | /share/data... | {'roi_xs': ... | a3_-t1   | untagged | 20181215_025854 | hnk1     | 20daa65b-d1... |
| 19    | /curves/a3-... | /images/a3-... | /images/a3-... | /share/data... | {'roi_xs': ... | a3_-t1   | untagged | 20181215_025854 | hnk1     | 20daa65b-d1... |
| 20    | /curves/a3-... | /images/a3-... | /images/a3-... | /share/data... | {'roi_xs': ... | a3_-t1   | untagged | 20181215_025854 | hnk1     | 20daa65b-d1... |
| 21    | /curves/a3-... | /images/a3-... | /images/a3-... | /share/data... | {'roi_xs': ... | a3_-t1   | untagged | 20181215_025854 | hnk1     | 20daa65b-d1... |
| 22    | /curves/a3-... | /images/a3-... | /images/a3-... | /share/data... | {'roi_xs': ... | a3_-t1   | untagged | 20181215_025854 | hnk1     | 20daa65b-d1... |
| 23    | /curves/a3-... | /images/a3-... | /images/a3-... | /share/data... | {'roi_xs': ... | a3_-t1   | untagged | 20181215_025854 | hnk1     | 20daa65b-d1... |
| 24    | /curves/a3-... | /images/a3-... | /images/a3-... | /share/data... | {'roi_xs': ... | a3_-t1   | untagged | 20181215_025854 | hnk1     | 20daa65b-d1... |
| 25    | /curves/a3-... | /images/a3-... | /images/a3-... | /share/data... | {'roi_xs': ... | a3_-t1   | untagged | 20181215_025854 | hnk1     | 20daa65b-d1... |
| 26    | /curves/a3-... | /images/a3-... | /images/a3-... | /share/data... | {'roi_xs': ... | a3_-t2   | untagged | 20181215_030417 | hnk1     | a57ccdc2-0c... |
| 27    | /curves/a3-... | /images/a3-... | /images/a3-... | /share/data... | {'roi_xs': ... | a3_-t2   | untagged | 20181215_030417 | hnk1     | a57ccdc2-0c... |
| 28    | /curves/a3-... | /images/a3-... | /images/a3-... | /share/data... | {'roi_xs': ... | a3_-t2   | untagged | 20181215_030417 | hnk1     | a57ccdc2-0c... |
| 29    | /curves/a3-... | /images/a3-... | /images/a3-... | /share/data... | {'roi_xs': ... | a3_-t2   | untagged | 20181215_030417 | hnk1     | a57ccdc2-0c... |
| 30    | /curves/a3-... | /images/a3-... | /images/a3-... | /share/data... | {'roi_xs': ... | a3_-t2   | untagged | 20181215_030417 | hnk1     | a57ccdc2-0c... |
| 31    | /curves/a3-... | /images/a3-... | /images/a3-... | /share/data... | {'roi_xs': ... | a3_-t2   | untagged | 20181215_030417 | hnk1     | a57ccdc2-0c... |
| 32    | /curves/a3-... | /images/a3-... | /images/a3-... | /share/data... | {'roi_xs': ... | a3_-t2   | untagged | 20181215_030417 | hnk1     | a57ccdc2-0c... |
| 33    | /curves/a3-... | /images/a3-... | /images/a3-... | /share/data... | {'roi_xs': ... | a3_-t2   | untagged | 20181215_030417 | hnk1     | a57ccdc2-0c... |
| 34    | /curves/a3-... | /images/a3-... | /images/a3-... | /share/data... | {'roi_xs': ... | a3_-t2   | untagged | 20181215_030417 | hnk1     | a57ccdc2-0c... |
| 35    | /curves/a4-... | /images/a4-... | /images/a4-... | /share/data... | {'roi_xs': ... | a4_-t1   | untagged | 20181215_031107 | hnk1     | f646df26-db... |
| 36    | /curves/a4-... | /images/a4-... | /images/a4-... | /share/data... | {'roi_xs': ... | a4_-t1   | untagged | 20181215_031107 | hnk1     | f646df26-db... |
| 37    | /curves/a4-... | /images/a4-... | /images/a4-... | /share/data... | {'roi_xs': ... | a4_-t1   | untagged | 20181215_031107 | hnk1     | f646df26-db... |
| 38    | /curves/a4-... | /images/a4-... | /images/a4-... | /share/data... | {'roi_xs': ... | a4_-t1   | untagged | 20181215_031107 | hnk1     | f646df26-db... |
| 39    | /curves/a4-... | /images/a4-... | /images/a4-... | /share/data... | {'roi_xs': ... | a4_-t1   | untagged | 20181215_031107 | hnk1     | f646df26-db... |
| 40    | /curves/a4-... | /images/a4-... | /images/a4-... | /share/data... | {'roi_xs': ... | a4_-t1   | untagged | 20181215_031107 | hnk1     | f646df26-db... |
| 41    | /curves/a5-... | /images/a5-... | /images/a5-... | /share/data... | {'roi_xs': ... | a5_-t1   | untagged | 20181215_034156 | hnk1     | 202015b7-28... |

Format    Resize     Background color     Column min/max    Save and Close    Close

**Warning:** Make sure you know what you are doing when you directly modify the Project DataFrame. Changes cannot be undone but you can restore a backup from the project's *dataframe directory*. For example, do not modify data under the following columns: CurvePath, ImgInfoPath, ImgPath, ROI\_State, any uuid column.

See also:

Uses the [Spyder object editor](#)

## 1.7.4 Console

If you are familiar with pandas you can interact with the project DataFrame directly. If you are unfamiliar with pandas it's very easy to learn.

### See also:

[Pandas documentation](#)

### Useful Callables

| Callable                          | Purpose                                                             |
|-----------------------------------|---------------------------------------------------------------------|
| <code>get_dataframe()</code>      | returns dataframe of the current project browser tab                |
| <code>get_root_dataframe()</code> | always returns dataframe of the root tab (entire project DataFrame) |
| <code>set_root_dataframe()</code> | pass a pandas.DataFrame instance to set it as the project DataFrame |

### Usage

General usage to modify the project DataFrame would be something like this:

```
# Get a copy the project DataFrame to modify
df = get_root_dataframe().copy()

# Do stuff to df
...

# Set the project DataFrame with the modified one
set_root_dataframe(df)
```

### Example

Let's say you have been inconsistent in naming "ATENA" ROI Tags in the "cell\_name" column. You can rename all occurrences of 'atena' to 'ATENA'

```
# Get a copy of the project DataFrame
>>> df = get_root_dataframe().copy()

# View all occurrences of 'atena'
>>> df.cell_name[df.cell_name == 'atena']
2      atena
3      atena
4      atena
5      atena
6      atena
205    atena
Name: cell_name, dtype: object

# Rename all occurrences of 'atena' to 'ATENA'
>>> df.cell_name[df.cell_name == 'atena'] = 'ATENA'

# Check that there are more occurrences of 'atena'
>>> df.cell_name[df.cell_name == 'atena']
```

(continues on next page)



(continued from previous page)

```
Series([], Name: cell_name, dtype: object)

# Check that we have renamed the 'atena' occurrences to 'ATENA'
# Indices 2-6 and 205 were named 'atena'
>>> df.cell_name
0      untagged
1      untagged
2         ATENA
3         ATENA
4         ATENA
5         ATENA
6         ATENA
7         atenp
...
Name: cell_name, Length: 311, dtype: object

# Check index 205
>>> df.cell_name.iloc[205]
'ATENA'

# Finally set the changed DataFrame as the root (project) DataFrame
>>> set_root_dataframe(df)
```

## 1.8 Viewer overview

Based on the `pyqtgraph ImageView` widget.

**The Viewer allows you to do the following things:**

- Examine your calcium movies
- Use modules to perform things like motion correction, CNMF(E), ROI labeling, and stimulus mapping. See their respective guides for details.
- You can also make modifications to an existing Sample in your project by opening it in the Viewer. See `Modify Sample` and `Overwrite` guide.

## 1.8.1 Video Tutorial

This tutorial shows how to create a New Project, open images in the Viewer, use the Stimulus Mapping module and perform Caiman motion correction

## 1.8.2 Layout

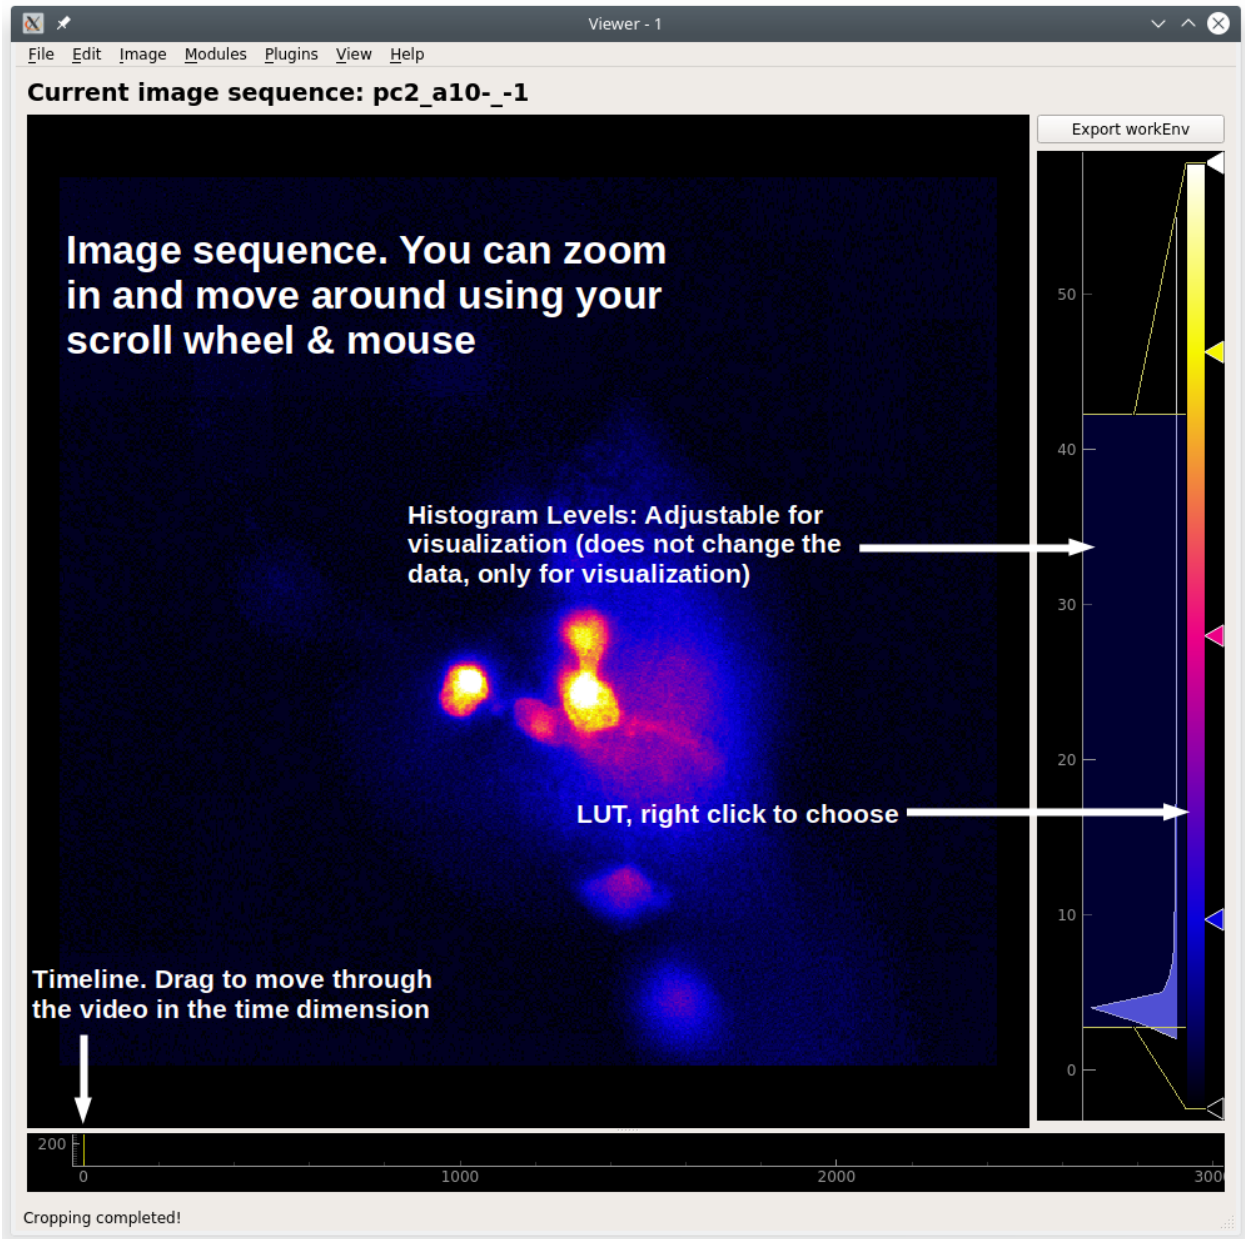

To access Viewer modules choose the module you want to run from the Modules menu at the top. All modules, except the Batch Manager, are small floating windows which you can dock into the Viewer by dragging them to an edge of the viewer.

### 3D data

When viewing 3D data a slider on the left allows you to move through the z axis.

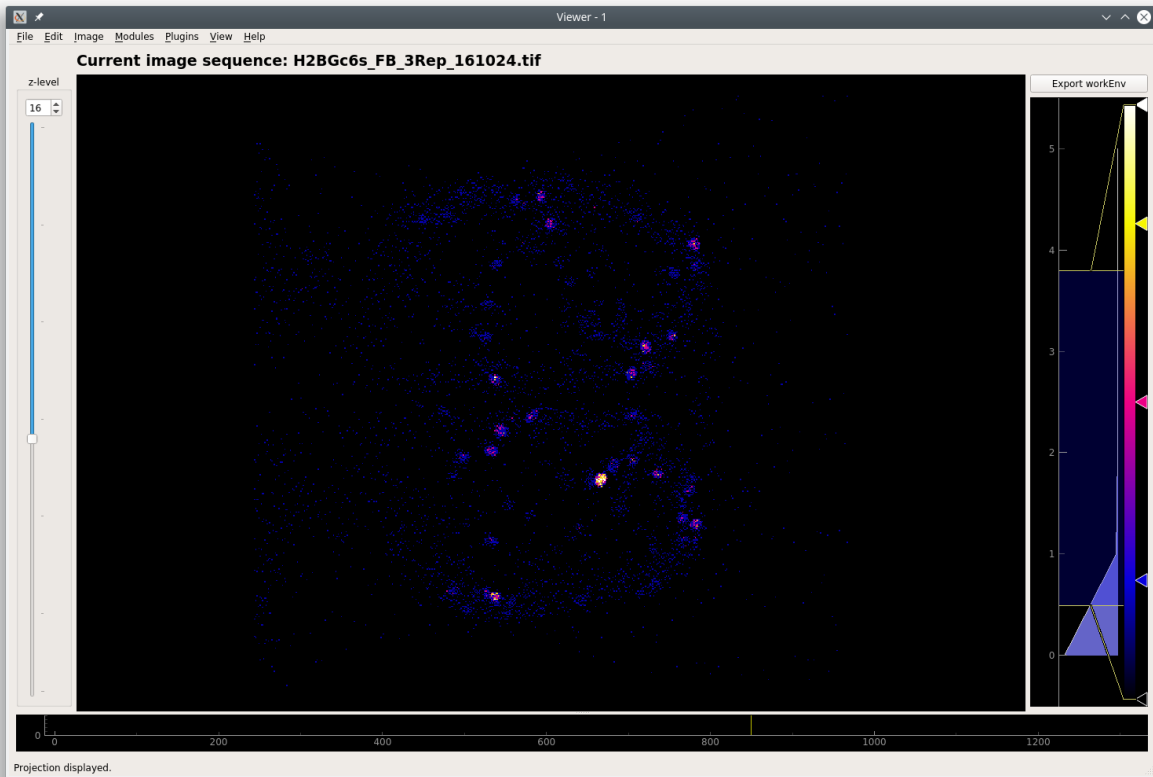

The image stack shown above is from Martin Haesemeyer’s dataset from the following paper:

Haesemeyer M, Robson DN, Li JM, Schier AF, Engert F. A Brain-wide Circuit Model of Heat-Evoked Swimming Behavior in Larval Zebrafish. *Neuron*. 2018;98(4):817-831.e6. doi:10.1016/j.neuron.2018.04.013

### 1.8.3 Work Environment

Everything in the viewer is stored in a Work Environment object. The main data attributes of the viewer work environment are outlined below.

**See also:**

*ViewerWorkEnv API*

| Attribute     | Description                                                                                                     |
|---------------|-----------------------------------------------------------------------------------------------------------------|
| imgdata       | <i>ImgData object</i> containing the Image Sequence and meta data from the imaging source                       |
| roi_manager   | The back-end <i>ROI Manager</i> that is currently in use                                                        |
| sample_id     | SampleID, if opened from a project Sample                                                                       |
| stim_maps     | Stimulus maps, if any are defined                                                                               |
| history_trace | History log, currently used for logging <i>caiman motion correction</i> , <i>CNMF</i> and <i>CNMFE</i> history. |
| UUID          | If opened from a project Sample, it refers to the <i>ImgUUID</i>                                                |

You can view everything in the current work environment by going to View -> Work Environment Editor. You cannot edit through this GUI at this time.

## 1.8.4 Menubar

### File

#### Add to Project

Add the current *work environment* as a Sample to the project.

#### Open Work Environment

Deprecated

#### Save Work Environment

Deprecated

#### Clear Work Environment

Clear the current *work environment*. Useful for freeing up RAM.

### Edit

Deprecated

### Image

#### Reset Scale

Reset the scale of the image VBox

#### Resize

Resize the image sequence using interpolation.

### Crop

Crop the image sequence.

#### Usage

1. When you click this option a square crop region will appear in the top left corner of the image sequence.
2. You can change its shape using the handle in the bottom right corner.
3. To crop to the selection, in the menubar go to Image -> Crop. To cancel cropping right click in the crop region and click "Remove ROI".

### Measure

Measure the distance (in pixels) between two points in the image sequence.

#### Usage

1. After clicking this option in the menubar, click on a point in the image sequence. You will not see anything yet.
2. Click on a second point in the image sequence, a line will appear connecting the first and second point that you clicked.
3. You can use the handles at the endpoints of the line to change the line.
4. The displacement in the x, y, and along the line will be displayed in the status bar (bottom left corner of the Viewer Window) when you hover over a measuring line.
5. You can create as many measuring lines as you want.
6. To remove a measuring line, right click on a handle and click "Remove ROI"

### Change dtype

Not implemented yet. You can change the dtype through the console.

### Projections

View Mean, Max, and Standard Deviation projections of the current image sequence in the work environment. If the data are 3D, the projection is of the current plane.

### Modules

Default Viewer Modules. These are explained in more details in the Viewer Modules chapters.

## Plugins

Custom viewer modules.

## View

### Work Environment Editor

Explore the data in your work environment using a GUI.

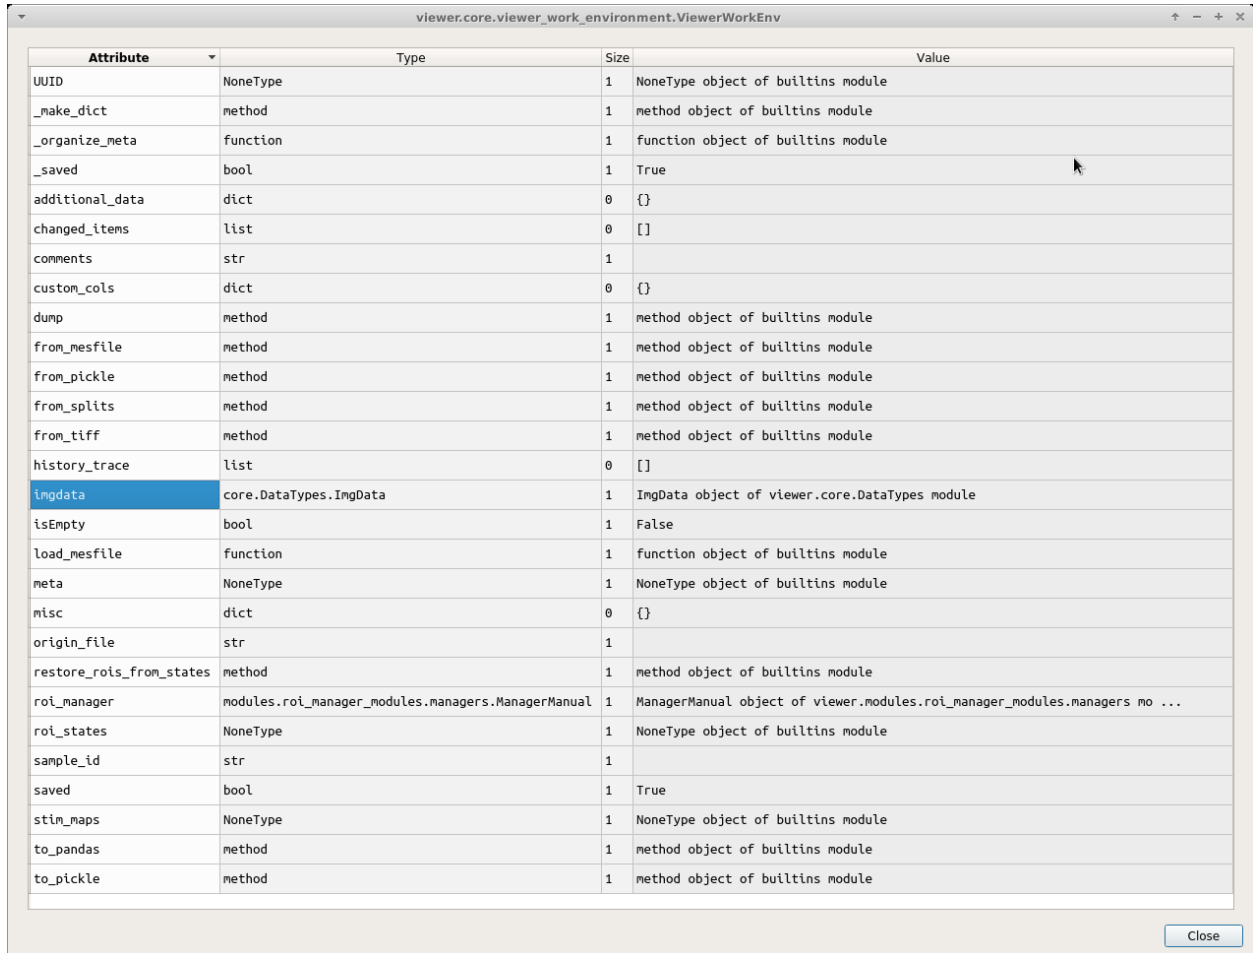

The screenshot shows a window titled "viewer.core.viewer\_work\_environment.ViewerWorkEnv" with a table of attributes. The table has four columns: Attribute, Type, Size, and Value. The "imgdata" row is highlighted in blue.

| Attribute                | Type                                               | Size | Value                                                                      |
|--------------------------|----------------------------------------------------|------|----------------------------------------------------------------------------|
| UUID                     | NoneType                                           | 1    | NoneType object of builtins module                                         |
| _make_dict               | method                                             | 1    | method object of builtins module                                           |
| _organize_meta           | function                                           | 1    | function object of builtins module                                         |
| _saved                   | bool                                               | 1    | True                                                                       |
| additional_data          | dict                                               | 0    | {}                                                                         |
| changed_items            | list                                               | 0    | []                                                                         |
| comments                 | str                                                | 1    |                                                                            |
| custom_cols              | dict                                               | 0    | {}                                                                         |
| dump                     | method                                             | 1    | method object of builtins module                                           |
| from_mesfile             | method                                             | 1    | method object of builtins module                                           |
| from_pickle              | method                                             | 1    | method object of builtins module                                           |
| from_splits              | method                                             | 1    | method object of builtins module                                           |
| from_tiff                | method                                             | 1    | method object of builtins module                                           |
| history_trace            | list                                               | 0    | []                                                                         |
| imgdata                  | core.DataTypes.ImgData                             | 1    | ImgData object of viewer.core.DataTypes module                             |
| isEmpty                  | bool                                               | 1    | False                                                                      |
| load_mesfile             | function                                           | 1    | function object of builtins module                                         |
| meta                     | NoneType                                           | 1    | NoneType object of builtins module                                         |
| misc                     | dict                                               | 0    | {}                                                                         |
| origin_file              | str                                                | 1    |                                                                            |
| restore_rois_from_states | method                                             | 1    | method object of builtins module                                           |
| roi_manager              | modules.roi_manager_modules.managers.ManagerManual | 1    | ManagerManual object of viewer.modules.roi_manager_modules.managers no ... |
| roi_states               | NoneType                                           | 1    | NoneType object of builtins module                                         |
| sample_id                | str                                                | 1    |                                                                            |
| saved                    | bool                                               | 1    | True                                                                       |
| stn_maps                 | NoneType                                           | 1    | NoneType object of builtins module                                         |
| to_pandas                | method                                             | 1    | method object of builtins module                                           |
| to_pickle                | method                                             | 1    | method object of builtins module                                           |

**Note:** This is read only, you cannot edit via this GUI.

For example if you want to see your meta data, double click on “imgdata” and then you can see that “imgdata” has two things, the image sequence (i.e. your video) and the meta data.

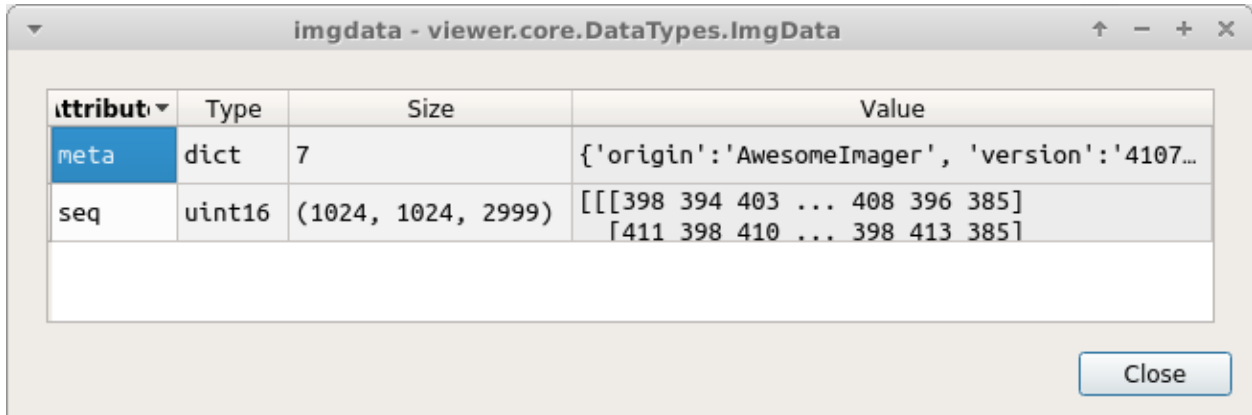

If you double click on “meta” above you can see your meta data.

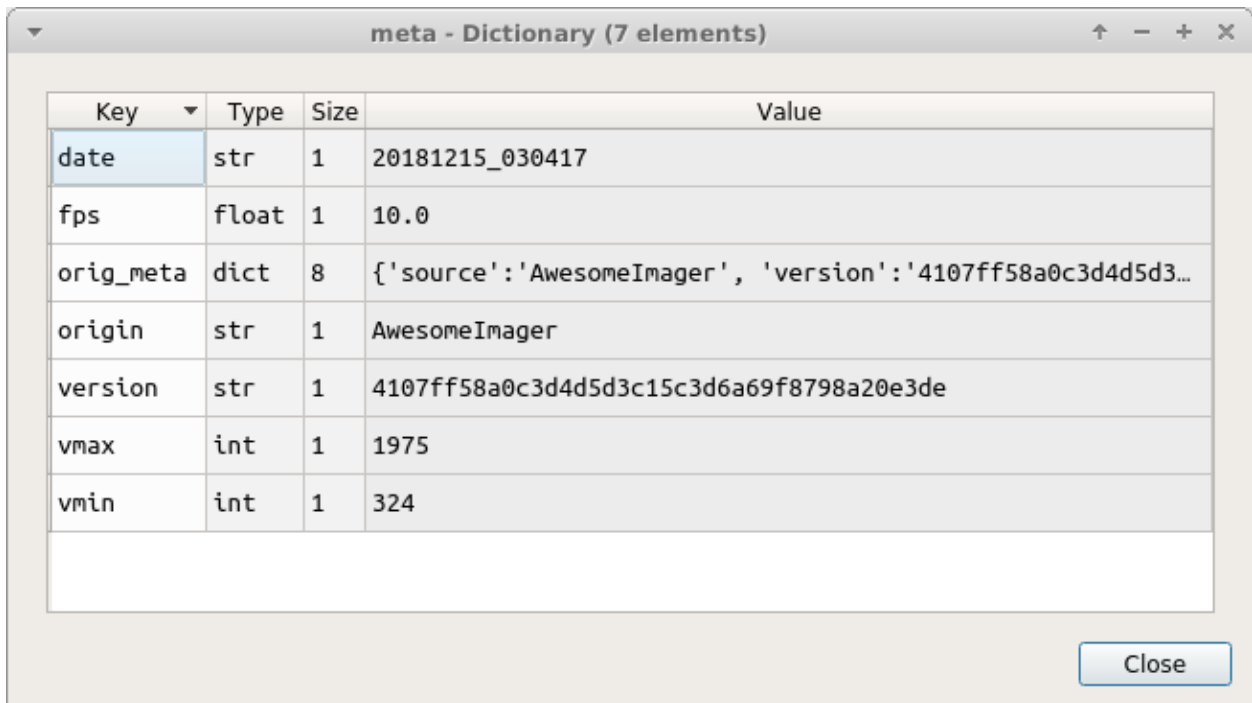

You can view your meta data more quickly using the console.

Open the console by going to View -> Console. You can then call `get_meta()` to print the meta data dict.

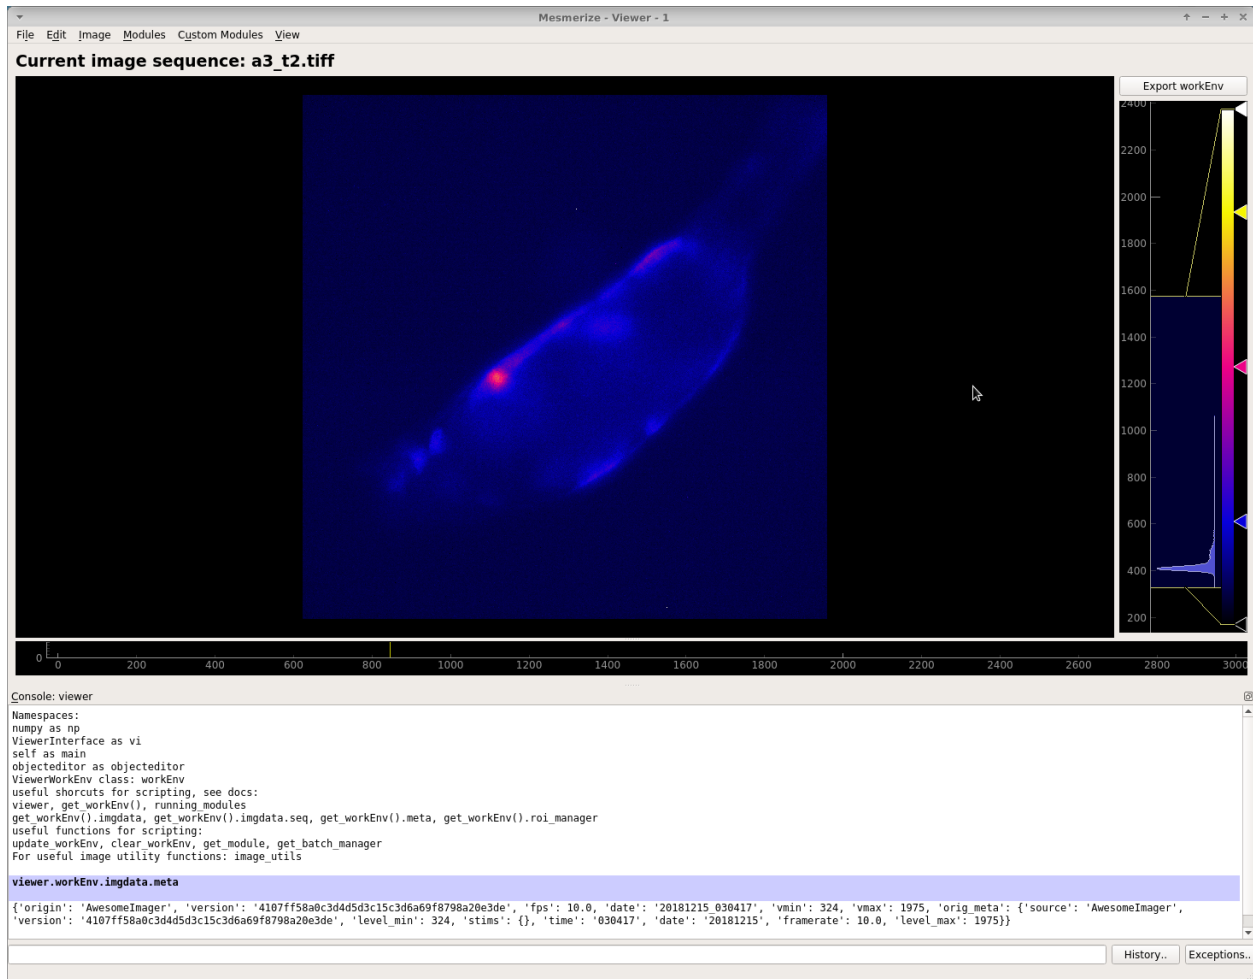

## Console

View/hide the viewer console

## Help

## Open docs

Open these docs



## 1.8.5 Console

You can interact directly with the *work environment* using the console.

**See also:**

*Viewer Core API, Overview on consoles*

### Namespace

| Reference           | Description                                                                                                                               |
|---------------------|-------------------------------------------------------------------------------------------------------------------------------------------|
| vi                  | Instance of <i>ViewerUtils</i> . Use this to interact with the viewer.                                                                    |
| all_modules         | List all available modules (includes default and any available plugins/custom modules)                                                    |
| Viewer-WorkEnv      | Use for creating new instances of <i>ViewerWorkEnv</i>                                                                                    |
| ImgData             | Use for creating new instances of <i>ImgData</i>                                                                                          |
| get_workEnv()       | Get the current viewer <i>work environment</i> (instance of <i>ViewerWorkEnv</i> )                                                        |
| get_image()         | Get the current image sequence (returns current <i>ViewerWorkEnv.imgdata.seq</i> ). If the data are 3D it returns the current plane only. |
| get_meta()          | Get the current meta data                                                                                                                 |
| get_module(<name>)  | Pass the name of a module as a string. Returns that module if it is available.                                                            |
| get_batch_manager() | Get the batch manager.                                                                                                                    |
| update_workEnv()    | Update the viewer GUI with the viewer work environment (vi.viewer.workEnv)                                                                |
| clear_workEnv()     | Clear the current work environment, cleanup the GUI and free the RAM                                                                      |

### Video Tutorial

### Examples

These examples can be run in the *Viewer Console*.

### Working with meta data

```
# view meta data
>>> get_meta()

{'origin': 'AwesomeImager', 'version': '4107ff58a0c3d4d5d3c15c3d6a69f8798a20e3de', 'fps': 10.0, 'date': '20190426_152034', 'vmin': 323, 'vmax': 1529, 'orig_meta': {'source': 'AwesomeImager', 'version': '4107ff58a0c3d4d5d3c15c3d6a69f8798a20e3de', 'level_min': 323, 'stims': {}, 'time': '152034', 'date': '20190426', 'framerate': 10.0, 'level_max': 1529}}

# manually set meta data entries
>>> get_meta()['fps'] = 30.0
```

## Open image

Use the *Viewer Core API* to open any arbitrary image

This example loads an image stored using `numpy.save()`, but this is applicable to images stored in any format that can eventually be represented as a numpy array in python. For example, you could also load image files stored in HDF5 format and load the numpy array that represents your image sequence.

```
1 import numpy as np
2
3 # clear the viewer work environment
4 clear_workEnv()
5
6 a = np.load('/path_to_image.npy')
7
8 # check what the axes order is
9 a.shape
10
11 # (1000, 512, 512) # for example
12 # looks like this is in [t, x, y]
13 # this can be transposed so we get [x, y, t]
14 # ImgData takes either [x, y, t] or [x, y, t, z] axes order
15
16 # Define a meta data dict
17 meta = \
18     {
19         "origin":      "Tutorial example",
20         "fps":         10.0,
21         "date":        "20200629_171823",
22         "scanner_pos": [0, 1, 2, 3, 4, 5, 6]
23     }
24
25 # Create ImgData instance
26 imgdata = ImgData(a.T, meta) # use a.T to get [x, y, t]
27
28 # Create a work environment instance
29 work_env = ViewerWorkEnv(imgdata)
30
31 # Set the current Viewer Work Environment from this new instance
32 vi.viewer.workEnv = work_env
33
34 # Update the viewer with the new work environment
35 # this MUST be run whenever you replace the viewer work environment (the previous line)
36 update_workEnv()
```

## Image data

Image sequences are simply numpy arrays. For example extract the image sequence between frame 1000 and 2000.

**See also:**

[Numpy array indexing](#)

```
1 # Get the current image sequence
2 seq = get_image()
3
4 # Trim the image sequence
5 trim = seq[:, :, 1000:2000]
6
7 # Set the viewer work environment image sequence to the trim one
8 vi.viewer.workEnv.imgdata.seq = trim
9
10 # Update the GUI with the new work environment
11 update_workEnv()
```

## View analysis log

View the analysis log, such as batch manager processing history.

```
>>> get_workEnv().history_trace

[{'caiman_motion_correction': {'max_shifts_x': 32, 'max_shifts_y': 32, 'iters_rigid': 1,
→ 'name_rigid': 'Does not matter', 'max_dev': 20, 'strides': 196, 'overlaps': 98,
→ 'upsample': 4, 'name_elas': 'a1_t2', 'output_bit_depth': 'Do not convert', 'bord_px': 5},
→ {'cnmfe': {'Input': 'Current Work Environment', 'frate': 10.0, 'gSig': 10, 'bord_
→ px': 5, 'min_corr': 0.9600000000000001, 'min_pnr': 10, 'min_SNR': 1, 'r_values_min': 0.
→ 7, 'decay_time': 2, 'rf': 80, 'stride': 40, 'gnb': 8, 'nb_patch': 8, 'k': 8, 'name_
→ corr_pnr': 'a8_t1', 'name_cnmfe': 'a1_t2', 'do_corr_pnr': False, 'do_cnmfe': True}}, {
→ 'cnmfe': {'Input': 'Current Work Environment', 'frate': 10.0, 'gSig': 10, 'bord_px': 5,
→ 'min_corr': 0.9600000000000001, 'min_pnr': 14, 'min_SNR': 1, 'r_values_min': 0.7,
→ 'decay_time': 4, 'rf': 80, 'stride': 40, 'gnb': 8, 'nb_patch': 8, 'k': 8, 'name_corr_
→ pnr': '', 'name_cnmfe': 'a1_t2', 'do_corr_pnr': False, 'do_cnmfe': True}}]
```

## Running scripts

You can use the *Script Editor* to run scripts in the Viewer console for automating tasks such as batch creation. It basically allows you to use the *viewer console* more conveniently with a text editor. The execution environment of the viewer console and script editor are identical.

Some example are provided for caiman modules and *stimulus mapping*.

## 1.9 Add a Sample to the Project

When you are happy with the ROIs in the viewer for the current CNMF(E) derived or manually created ROIs, you can add this as a *Sample* to your project.

Each sample in your project contains the following:

- The imaging data from which ROIs were extracted (the video)
- All the ROIs with their spatial location, temporal dynamics, and any tags that you have entered in the ROI Manager.
- Stimulus mappings, if your project is configured for this.
- Meta data (that were associated with the imaging video), the date, video framerate.
- Any further information that you have chosen to add based on your Project Configuration

---

**Note:** If your ROIs were obtained through CNMF/CNMF(E) the following attributes from the final `cnm` object are stored: `cnm.A`, `cnm.b`, `cnm.C`, `cnm.f`, `cnm.YrA`

---

### 1.9.1 How to

To add the current *viewer work environment* (see above) as a sample to your project, go to File -> Add To Project. You will be presented with a window similar to this:

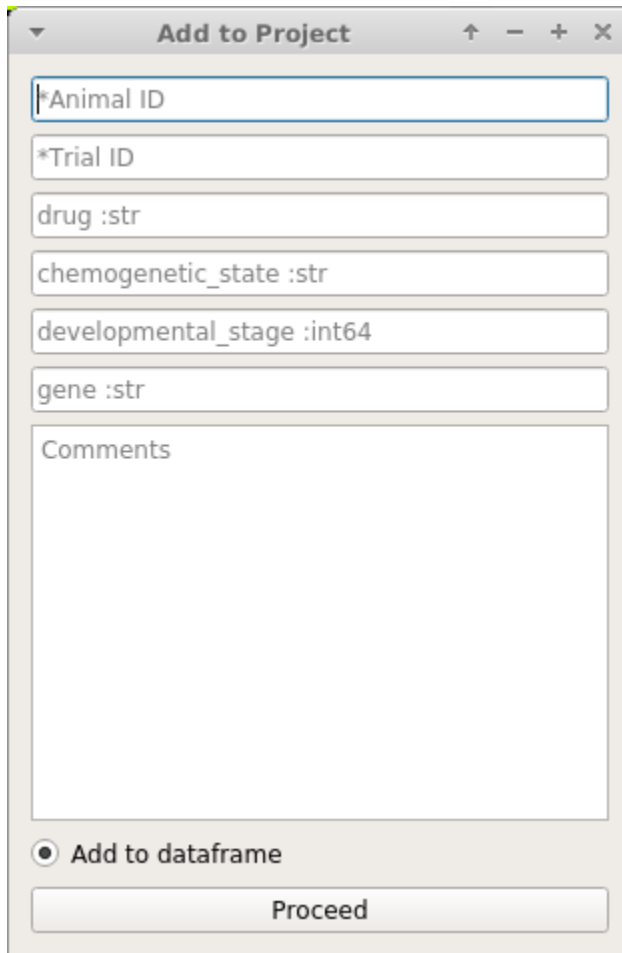

The screenshot shows a dialog box titled "Add to Project". It contains several input fields for project configuration: "\*Animal ID", "\*Trial ID", "drug :str", "chemogenetic\_state :str", "developmental\_stage :int64", and "gene :str". Below these is a large text area labeled "Comments". At the bottom, there is a radio button labeled "Add to dataframe" which is selected, and a "Proceed" button.

The entries that you are prompted with directly correspond to the custom columns in your Project Configuration.

**See also:**

*Project Configuration*

Every Sample in a project has a unique **SampleID** which is the combination of **AnimalID** + **TrialID**.

**Warning:** You can never change the **AnimalID** or **TrialID** (i.e. **SampleID**) since these are partially used as **unique identifiers**. A workaround is described in the [FAQ for Project Organization](#).

**Warning:** **AnimalID** and **TrialID** are separated by the `--` character combination when stored as a **SampleID**. Therefore do not use that character combination within your **AnimalID** or **TrialID**.

## 1.9.2 Video Tutorial

## 1.10 Tiff file module

To open a tiff file go to Modules -> Load Images -> Tiff files.

**Note:** You can also use this module through the console and scripts. See [Tiff module API](#).

To open tiff files first click the “Select file” button and choose your file. You can also drag and drop a tiff file (drag and drop doesn’t work properly on Windows).

The screenshot shows a software interface titled "Tiff file I/O". It is divided into two main panels. The left panel, titled "Tiff File", contains a "Select tiff file" button, a section for "Image Load Method" with three radio button options: "asarray", "asarray - multi series", and "imread", and a section for "Image Axes order" with three radio button options: "2D: [t, x, y]", "3D: [t, z, x, y]", and "Custom, ex: xyzt". The right panel, titled "Meta data file", has a checked checkbox for "Load meta data", a "Select meta data file" button, and a "Meta data format" section with a text area containing the text "Awesomemager" and "json\_minimal". At the bottom of the entire dialog is a large button labeled "Load into Work Environment".

Next, you must select an appropriate Image Load Method (see next section). You can also import meta data associated with your recording.

**Certain meta data, such as the sampling rate of the data, are necessary for some downstream analysis procedures.**

There are a few ways to import your meta data into the Viewer Work Environment:

- Simple JSON files, see *json\_minimal* under the table in the *Meta data* section
- Define your own *Custom functions* to open meta in other file formats
- Manually create a meta data dictionary using the *Console*

### 1.10.1 Load Method

The options for “Load Method” correspond to the `tiff` library method that is used for loading the images.

If you are not sure which method you should use, try all of them and see which one loads your data appropriately. If none of them work, [create an issue on GitHub](#).

- **asarray:** Should work for most tiff files, fast method
- **asarray - multi series:** Also fast. Use this if it is a multi-page tiff. For example if the tiff file was created by a program that appends each frame to a file as they are being acquired by the camera.
- **imread:** Usually slower, should work for most tiff files.

### 1.10.2 Axes order

Choose the default axes order or manually enter the axes order if your tiff file uses a different order.

### 1.10.3 Meta data

Check the “Load meta data” checkbox if you want to load meta data. Alternatively, you can uncheck this box and create a meta data dictionary manually using the console (see the *Console* section)

You can select a meta data format from the list. This list of formats correspond to the functions available in the module: `mesmerize.viewer.core.organize_meta`. When you select a meta data format, it will automatically try to find a file with the extension specified by the selected format if it has the same name as the selected tiff file.

If you have questions on meta data formats feel free to drop a message in the [Gitter room](#)

**Default list of formats that are recognized:**

| Name          | extension | Description                                                                                                                                                                                                                                                                                                   |
|---------------|-----------|---------------------------------------------------------------------------------------------------------------------------------------------------------------------------------------------------------------------------------------------------------------------------------------------------------------|
| json_minimal  | .json     | Recognizes a json file that contains at least the minimal set of necessary keys: <code>origin</code> , <code>fps</code> and <code>date</code> .<br><br>All other keys in the JSON file are placed in a sub-dictionary with the key <code>orig_meta</code><br><br>See <i>Minimal dict</i> below for more info. |
| AwesomeImager | .json     | Used for 1p imaging in the <a href="#">Chatzigeorgiou group</a> at the <a href="#">Sars Center</a>                                                                                                                                                                                                            |

## Custom functions

You may define your own function to organize your meta data. It MUST return a dict which has at least the following keys: `origin`, `fps` and `date`.

- `origin` is a `str` describing the software or microscope the recording comes from. This is for your own record.
- `fps` is the sampling rate of the recording as a `float` or `int`
- `date` is the date & time represented by a `str` in the following format: "YYYYMMDD\_HHMMSS"

In addition to these 3 keys, you may include any additional keys as you wish.

If you think your meta data organizing function will be useful for others I'll be happy to review a pull request and it can be included by default in Mesmerize. We're happy help you create a meta data function, just contact us on [Gitter](#) or [create an issue on GitHub](#).

## Minimal dict

Example of a minimal meta data dict.

```
{
  "origin": "microscope or software origin", # must be a str
  "fps":    10.0,                          # must be a int or float
  "date":   "20201123_172345"              # must be a str formatted as "YYYYMMDD_
↪HHMMSS"
}
```

## Function outline

Basic outline of a function that you can add to `mesmerize.viewer.core.organize_meta` for organizing your meta data:

1. The function can only take the `path` to the meta data file as the argument.
2. The expected file extension for the meta data must be specified. The files of a single format are allowed to have multiple different file extension but you must only specify the most common one.
3. The function would generally open the meta data file specified by the `path`, using any python libraries or other code of your choice, and finally return a dictionary that contains the minimal complement of keys, i.e. `origin`, `fps` and `date` with values of the appropriate types (see previous section).

```
def my_meta_organizer(path: str) -> dict:
    """.ext""" # define the file ext in the docstring

    raw_meta = function_to_load_my_file(path)

    # do stuff to organize the raw_meta

    meta = ... # stuff to organize raw meta
    return meta
    # return the organized meta data dict
    # that mesmerize can use
```



## 1.10.4 Console/Script usage

You can also load tiff files through the *Viewer Console* or *Script Editor*.

This example can be run line-by-line through the *Viewer Console*, or from the *Script Editor*.

```
1 image_path = # path to tiff file
2 meta_path = # path to json meta data file
3
4 clear_workEnv() # Prevents a confirmation dialog from appearing
5
6 # Get the tiff module
7 tio = get_module('tiff_io', hide=True)
8
9 # Load the tiff file
10 tio.load(image_path, method='imread', axes_order='txy', meta_path=meta_path, meta_format=
    ↳ 'json_minimal')
```

**Alternatively, you may manually create a meta data dictionary after loading a tiff file:**

```
1 image_path = # path to tiff file
2
3 clear_workEnv() # Prevents a confirmation dialog from appearing
4
5 # Get the tiff module
6 tio = get_module('tiff_io', hide=True)
7
8 # Load the tiff file
9 tio.load(image_path, method='imread', axes_order='txy')
10
11 meta_dict = \
12     {
13         "origin": "my_microscope_software", # must a str
14         "fps": 17.25, # must be a int or float
15         "date" "20201123_172345" # must be a str formatted as "YYYYMMDD_
    ↳ "HHMMSS"/
16     }
17
18 get_workEnv().imgdata.meta = meta_dict
```

**See also:**

*Tiff module API, Viewer Core API, Overview on consoles*

## 1.11 Batch Manager

**Batch process computationally intensive tasks.**

**See also:**

*Batch Manager API*

### 1.11.1 Video Tutorial

This tutorial shows how to create a New Project, open images in the Viewer, use the Stimulus Mapping module and perform Caiman motion correction

This is currently used for *Caiman Motion Correction*, *CNMF*, *CNMF 3D* and *CNMF-E*.

The Batch Manager can be accessed in the viewer through Modules -> Batch Manager. If you don't have a batch open you will be prompted with a dialog to open a batch or to select a location for a new batch.

**Warning:** The full path to the batch directory must not contain spaces or special characters, only a-z, A-Z, 0-9 and underscores.

The Batch Manager processes the batch items in external processes, allowing you to add batch items when that batch is being processed.

### 1.11.2 Layout

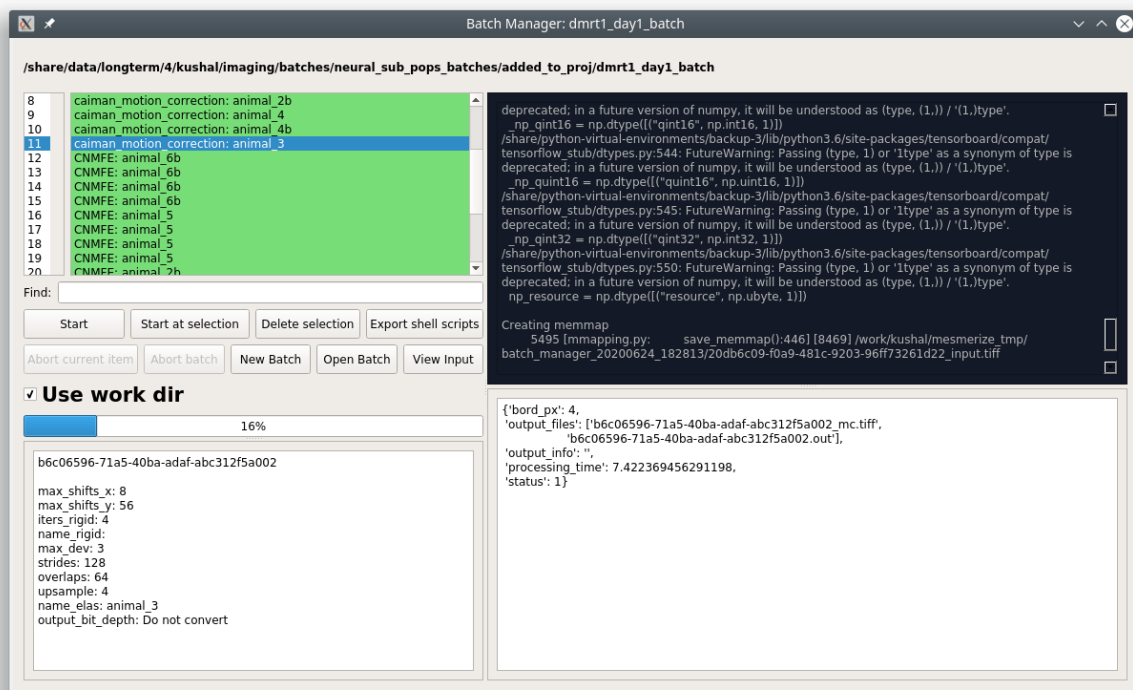

Window title: Name of batch directory

**Top:** Parent directory of batch directory

**Top left:** list of batch items and some controls.

| Colors | Description                                                                                  |
|--------|----------------------------------------------------------------------------------------------|
| Green  | Finished without exceptions                                                                  |
| Red    | Did not finish, click on the item to see the exceptions in the bottom right information area |
| Yellow | Currently being processed                                                                    |
| Orange | Item aborted by user                                                                         |
| Blue   | Output data for this item are being moved from the work dir to the batch dir.                |

| Button               | Description                                                                                       |
|----------------------|---------------------------------------------------------------------------------------------------|
| Start                | Process the batch from the first item.                                                            |
| Start at selection   | Process the batch starting from the item that is currently selected in the list.                  |
| Delete selection     | Delete the item that is currently being selected along with the associated data in the batch dir. |
| Export shell scripts | Export bash scripts so that the batch items can be run on a computing cluster                     |
| Abort current item   | Abort the current batch item and move on to the next item                                         |
| Abort batch          | Abort the current item and stop processing the batch                                              |
| New batch            | Create a new batch                                                                                |
| Open batch           | Open a batch                                                                                      |
| View Input           | Open the input work environment, in the viewer, for the currently selected item                   |

**Use work dir:** Check this box to use the work dir that has been set in the *System Configuration*. This feature is only available on Linux & Mac OSX.

**Top right:** Standard out from the external processes that are processing the batch items.

**Bottom left:** Parameters for the selected batch item. The first line is the UUID of the batch item.

**Bottom right:** Output information area for the currently selected item.

### 1.11.3 Scheduling

You can schedule a batch to run at a later time using the following bash script. Doesn't work for a snap installation yet.

mesmerize-scheduler

**Usage:**

```
Usage: mesmerize-scheduler -b <batch> -i <start item> -t <start time>
```

```
-b      full batch path in quotes, no spaces
-i      uuid of the batch item to start from, no quotes
-t      time at which to start the batch, no quotes
```

```
examples of how to specify time:
      23:00 7:30Feb30
      use 24hr time and no spaces
```

Full usage example:

```
mesmerize-scheduler -b "/share/data/temp/kushal/pc2_batch" -i a80d1923-e490-4eb3-
↪ba4f-7e651d4cf938 -t 2:00
```

## 1.12 Stimulus Mapping

*API Reference*

### 1.12.1 Video Tutorial

This tutorial shows how to create a New Project, open images in the Viewer, use the Stimulus Mapping module and perform Caiman motion correction

**Map temporal information such as stimulus or behavioral periods.**

Stimulus Mapping Module

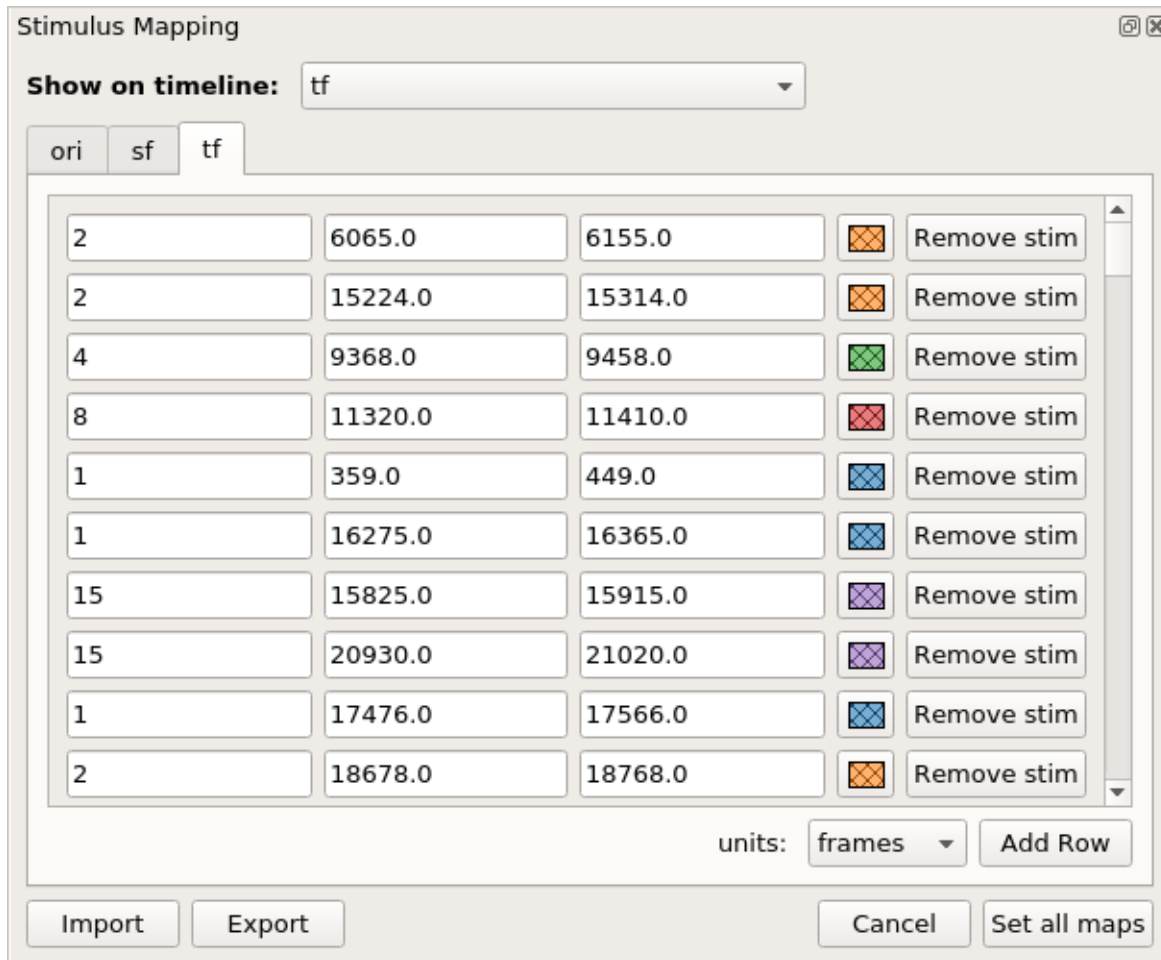

Stimulus periods illustrated on the viewer timeline

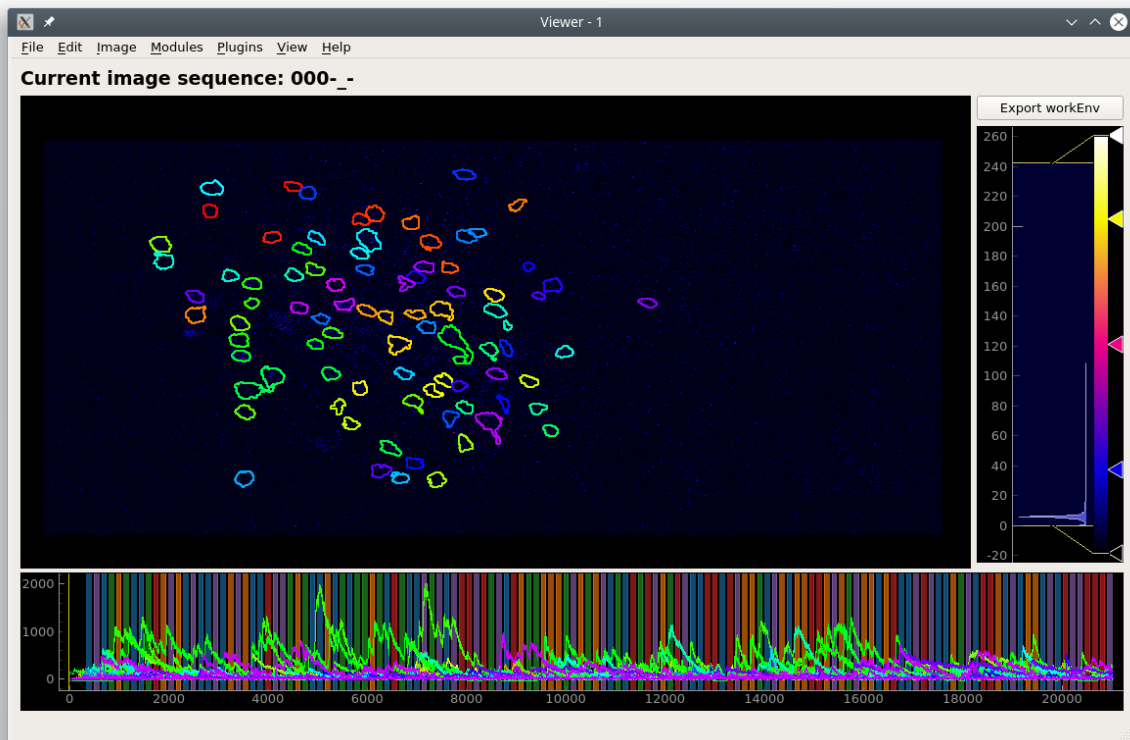

The tabs that are available in the stimulus mapping module corresponds to the stimulus types in your *Project Configuration*.

You can add stimulus periods either manually or through a script.

### 1.12.2 Manual Annotation

1. To add a stimulus manually click the “Add Row” button. This will add an empty row to the current tab page.
2. Enter a name for the stimulus, start time, end time, and pick a color for illustrating the stimulus periods on the Viewer timeline.
3. To remove a stimulus click the “Remove stim” button. Stimulus periods do not have to be added in chronological order.
4. Click “Set all maps” to set the mappings for all stimulus types. You can then choose to illustrate a stimulus on the viewer timeline by selecting it from “Show on timeline”

Import and Export are not implemented yet.

**Warning:** At the moment, only “frames” are properly supported for the time units.

**Note:** It is generally advisable to keep your stimulus names short with lowercase letters. When sharing your project you can provide a mapping for all your keys. This helps maintain consistency throughout your project and makes the data more readable.

### 1.12.3 Script

#### See also:

*API Reference*

You can also use the *Stimulus Mapping module's API* to set the stimulus mappings from a pandas DataFrame.

This example creates a pandas DataFrame from a csv file to set the stimulus mappings. It uses the csv file from the pvc-7 dataset available on CRCNS: <http://dx.doi.org/10.6080/K0C8276G>

You can also download the csv here: `stimulus_pvc7.csv`

This example is meant to be run through the *Viewer Script Editor*

```

1 import pandas as pd
2 from mesmerize.plotting.utils import get_colormap
3
4 # Load dataframe from CSV
5 df = pd.read_csv('path_to_csv_file')
6
7 # Sort according to time
8 df.sort_values(by='start').reset_index(drop=True, inplace=True)
9
10 # Trim off the stimulus periods that are not in the current image sequence
11 trim = get_image().shape[2]
12 df = df[df['start'] <= trim]
13
14 # get one dataframe for each of the stimulus types
15 ori_df = df.drop(columns=['sf', 'tf', 'contrast']) # contains ori stims
16 sf_df = df.drop(columns=['ori', 'tf', 'contrast']) # contains sf stims
17 tf_df = df.drop(columns=['sf', 'ori', 'contrast']) # contains tf stims
18
19 # Rename the stimulus column of interest to "name"
20 ori_df.rename(columns={'ori': 'name'}, inplace=True)
21 sf_df.rename(columns={'sf': 'name'}, inplace=True)
22 tf_df.rename(columns={'tf': 'name'}, inplace=True)
23
24
25 # Get the stimulus mapping module
26 smm = get_module('stimulus_mapping')
27
28 # set the stimulus map in Mesmerize for each of the 3 stimulus types
29 for stim_type, _df in zip(['ori', 'sf', 'tf'], [ori_df, sf_df, tf_df]):
30     # data in the name column must be `str` type for stimulus mapping module
31     _df['name'] = _df['name'].apply(str)
32
33     # Get the names of the stimulus periods
34     stimuli = _df['name'].unique()
35     stimuli.sort()
36
37     # Create colormap with the stimulus names
38     stimuli_cmap = get_colormap(stimuli, 'tab10', output='pyqt', alpha=0.6)
39
40     # Create a column with colors that correspond to the stimulus names
41     # This is for illustrating the stimulus periods in the viewer plot

```

(continues on next page)

(continued from previous page)

```

42  _df['color'] = _df['name'].map(stimuli_cmap)
43
44  # Set the data in the Stimulus Mapping module
45  smm.maps[stim_type].set_data(_df)

```

## 1.13 ROI Manager

### API Reference

#### Manage and annotate ROIs

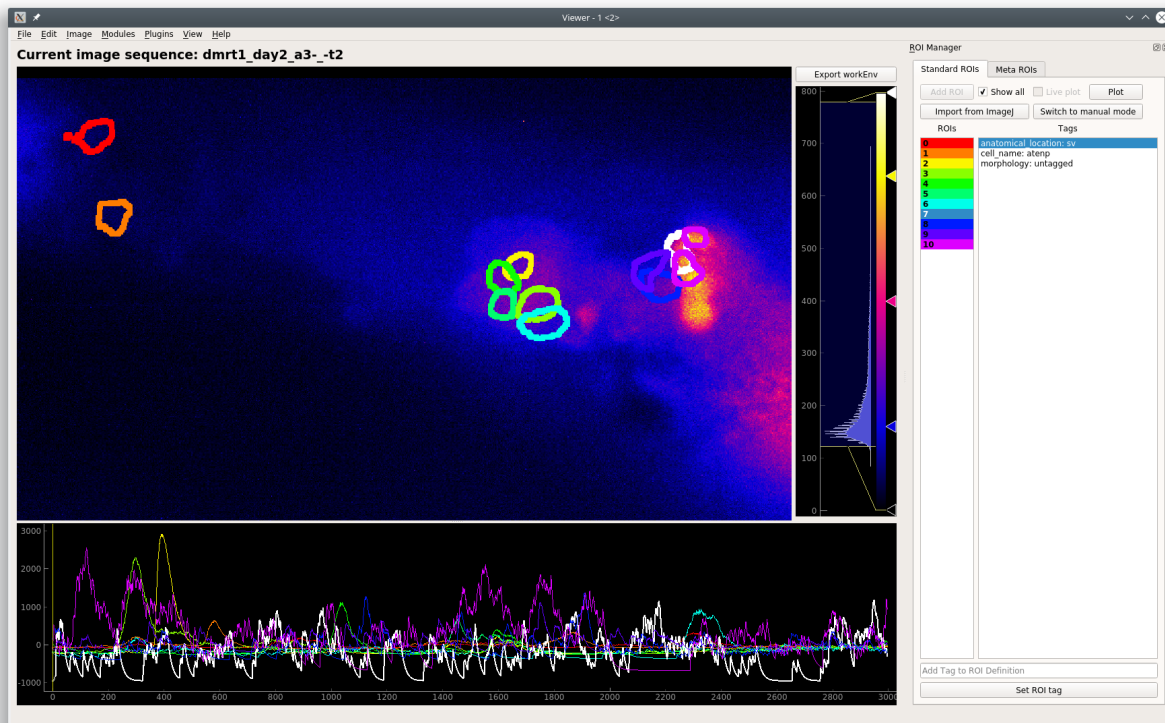

The ROI Manager has a manual mode, to draw ROIs manually, and a CNMF(E) mode where ROIs can be imported from CNMF(E) outputs.

#### See also:

*CNMF*, *CNMF 3D*, and *CNMF E*.

**Note:** You cannot combine manual and CNMF(E) ROIs in the same sample.

The ImageJ ROI import uses the read-roi package by Hadrien Mary <https://pypi.org/project/read-roi/>

### 1.13.1 Video Tutorial

### 1.13.2 Layout

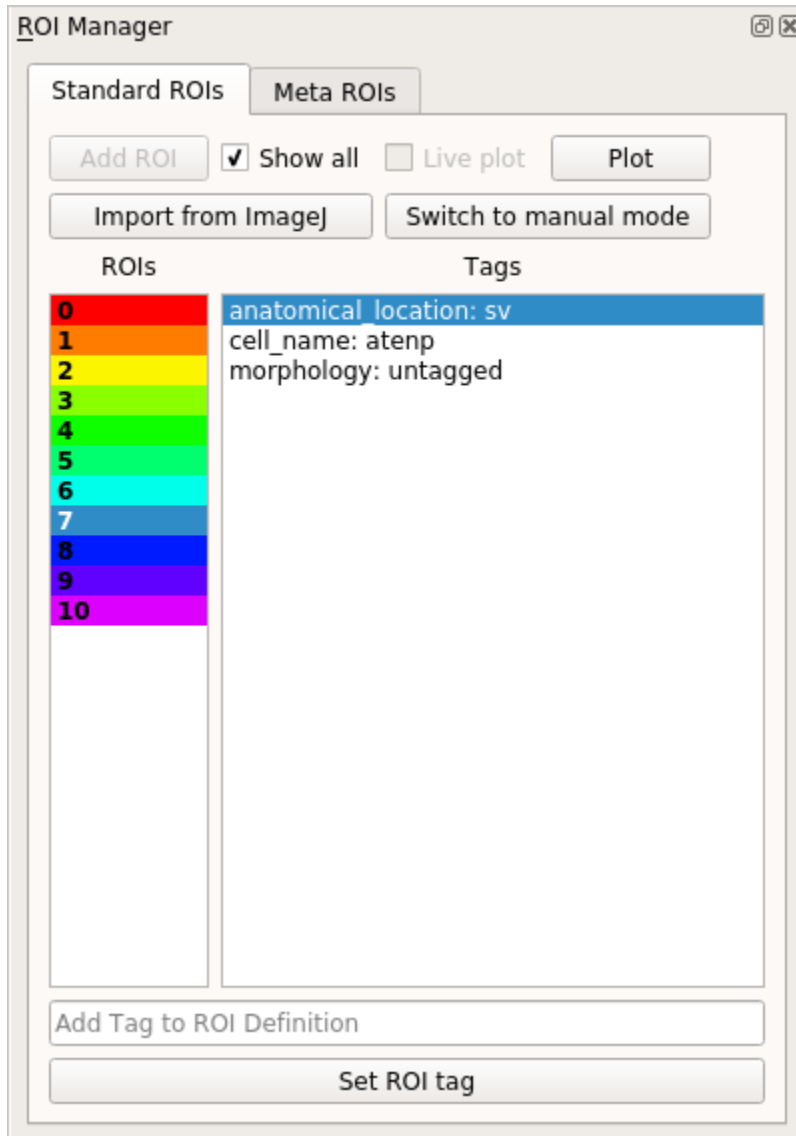

#### Controls



| UI                    | Description                                                                                                                                                        |
|-----------------------|--------------------------------------------------------------------------------------------------------------------------------------------------------------------|
| Add ROI button        | Add Polygon ROI (Manual mode)<br><br>Right click this button to add an elliptical ROI                                                                              |
| Show all              | Show all ROIs in the viewer                                                                                                                                        |
| Live plot             | Live update of the curve plot with changes (Manual mode)                                                                                                           |
| Plot                  | Plot the curves (Manual mode)                                                                                                                                      |
| Import from ImageJ    | Import ROIs from an ImageJ ROIs zip file (Manual mode)                                                                                                             |
| Switch to manual ...  | Switch to Manual mode. Clears CNMF(E) ROIs.                                                                                                                        |
| ROIs list             | Color-coded list of ROIs.<br><br>Left click to highlight the ROI in the viewer<br><br>Right click to show the context menu allowing you to delete the selected ROI |
| Tags list             | List of tags for the selected ROI<br><br>Correspond to the <i>ROI Type Columns of the Project Configuration</i>                                                    |
| Add Tag to ROI Def... | Set the tag for the current selection in the Tags list                                                                                                             |
| Set ROI Tag           | Click to set the tag, or just press return in the text entry above                                                                                                 |

**Note:** It is generally advisable to keep your ROI tags short with lowercase letters. When sharing your project you can provide a mapping for all your keys. This helps maintain consistency throughout your project and makes the data more readable.

**Note:** When using 3D data, the ROIs are colored randomly along the list (not linearly as shown in the image). If you want to set the colors linearly call this in the Viewer Console: `get_workEnv().roi_manager.roi_list.reindex_colormap(random_shuffle=False)`

**Warning:** Importing several *thousands* of ROIs can take 15-30 minutes. You will be able to track the progress of the import in the Viewer Window's status bar.

### Keyboard shortcuts.

These only work when the ROI manager is docked within the Viewer and while you are typing in the *Add Tag to ROI Definition* text entry.

| Key         | Description                            |
|-------------|----------------------------------------|
| Page Up     | Select previous ROI                    |
| Page Down   | Select next ROI                        |
| Right Arrow | Play the video at high speed           |
| Left Arrow  | Play the video backwards at high speed |
| Home        | Go to the beginning of the video       |
| End         | Go to the end of the video             |

### 1.13.3 Manual ROI Mode

When you click the “Add ROI” button to add a Manual Polygon ROI, a new rectangular ROI will be added in the top left corner of the image. You can add new vertices to this polygon by clicking on any of its edges. You can drag the vertices to change the shape of the polygon, and you can drag the entire ROI as well by clicking and dragging within the ROI region. Similarly you can reshape elliptical ROIs.

Hovering over the ROI selects it in the ROI list.

### 1.13.4 Console

These examples can be run through the viewer console or *Script editor* to interact with the ROIs.

**See also:**

*Back-end ROI Manager APIs, ROIList API, ROI Type APIs*

Get the back-end ROI Manager, see *ROI Manager APIs*

```
>>> get_workEnv().roi_manager
<mesmerize.viewer.modules.roi_manager_modules.managers.ManagerCNMFROI object at 0x7f01b8780668>` `
```

Get the ROI List, see *ROIList API*

```
>>> get_workEnv().roi_manager.roi_list
[<mesmerize.viewer.modules.roi_manager_modules.roi_types.CNMFROI object at 0x7f01bc78b278>, <mesmerize.viewer.modules.roi_manager_modules.roi_types.CNMFROI object at 0x7f01bc817630>, <mesmerize.viewer.modules.roi_manager_modules.roi_types.CNMFROI object at 0x7f01bc817668>, <mesmerize.viewer.modules.roi_manager_modules.roi_types.CNMFROI object at 0x7f01bc7c5438>, <mesmerize.viewer.modules.roi_manager_modules.roi_types.CNMFROI object at 0x7f01bc7c5208>]
```

Work with an ROI object, see *ROI Type APIs*

```
# Get the curve data of an ROI
>>> get_workEnv().roi_manager.roi_list[3].curve_data
(array([ 0, 1, 2, ..., 2995, 2996, 2997]), array([-207.00168389, -161.78229208,
-157.62522988, ..., -1017.73174502,
-1030.27047731, -1042.26989668]))

# Get the tags of an ROI
```

(continues on next page)

(continued from previous page)

```
>>> get_workEnv().roi_manager.roi_list[2].get_all_tags()
{'anatomical_location': 'tail', 'cell_name': 'dcen', 'morphology': 'untagged'}
# Get a single tag
>>> get_workEnv().roi_manager.roi_list[2].get_tag('cell_name')
'dcen'
```

## 1.14 Caiman Motion Correction

Perform motion correction using the NoRMCorre implementation in the CaImAn library.

**I highly recommend going through the following before using this module**

- **NoRMCorre paper** Pnevmatikakis, E. A., & Giovannucci, A. (2017). NoRMCorre: An online algorithm for piecewise rigid motion correction of calcium imaging data. *Journal of Neuroscience Methods*, 291, 83–94.
- **The CaImAn demo notebook, the implementation in Mesmerize is basically from the demo** [https://github.com/flatironinstitute/CaImAn/blob/master/demos/notebooks/demo\\_motion\\_correction.ipynb](https://github.com/flatironinstitute/CaImAn/blob/master/demos/notebooks/demo_motion_correction.ipynb)

CaImAn Motion Correction
⊞ ✕

Use motion correction kwargs

### Rigid correction

Output bit depth: Do not conv ▾

gSig\_filt: 0 ▲ ▾

max shifts X (pixels): 0 ▲ ▾

max shifts Y (pixels): 0 ▲ ▾

iterations for rigid: 1 ▲ ▾

If do only rigid correction add here

### Elastic correction

max deviation from rigid: 3 ▲ ▾

strides (pixels): 0 ▲ ▾

overlaps (pixels): 0 ▲ ▾

upsample grid: 4 ▲ ▾

#### Parameters

Output bit depth: The motion corrected image sequences are of float32 type. You can optionally convert the output to

8 or 16 bit uint types to save disk space. **This doesn't always work from my experience, values might get clipped.**

For all other parameters please see the demo notebook mentioned above.

You can also enter parameters as keyword arguments (kwargs) in the text box if you select “Use motion correction kwargs”. This is useful if you want to enter parameters that cannot be entered in the GUI for example. **Use single quotes if you want to enter string kwargs, do not use double quotes.**

### 1.14.1 Usage

This module adds a “caiman motion correction” *item* to the batch. Set the desired parameters (see demo notebook) and then enter a name to add it as an *item* to the batch. After the batch item is processed, double-click the batch item to open the motion corrected image sequence in the viewer. You can then use this motion corrected image sequence for further analysis.

**See also:**

This modules uses the *Batch Manager*.

---

**Note:** The parameters used for motion correction are stored in the work environment of the viewer and this log is carried over and saved in the *Project Sample* as well. To see the parameters that were used for motion correction in the viewer, execute `get_workEnv().history_trace` in the viewer console and look for the `caiman_motion_correction` entry.

---

**Warning:** If you're using Windows, large *memmap* files will linger in your batch dir or work dir, you can clean them out periodically.

### 1.14.2 Script Usage

A script can be used to add caiman motion correction batch items. This is much faster than using the GUI.

**See also:**

*Script Editor*

**Add items**

This example shows how to add all tiff files (of image sequences) from a directory as batch items with 3 different variants of parameters.

**See also:**

This example uses the *Caiman Motion Correction Module API*, *ViewerWorkEnv API*, and *Batch Manager API*

```
1 # Import glob so we can get all tiff files in a dir
2 from glob import glob
3 # Import os to get filenames from paths
4 import os
5
6 # Motion correction params.
7
8 mc_kwargs = \
```

(continues on next page)

(continued from previous page)

```

9 {
10     "max_shifts":          (6, 6),
11     "niter_rig":          2,
12     "max_deviation_rigid": 3,
13     "strides":            (196, 196),
14     "overlaps":           (98, 98),
15     "upsample_factor_grid": 4,
16     "gSig_filt":          (10, 10) # Set to `None` for 2p data
17 }
18
19 params = \
20 {
21     'mc_kwargs':          mc_kwargs, # the kwargs we set above
22     'item_name':          "will set later per file",
23     'output_bit_depth':  "Do not convert" # can also set to `8` or `16` if you want the
↳ output in `8` or `16` bit
24 }
25
26 # Path to the dir containing images
27 files = glob("/full_path_to_raw_images/*.tiff")
28 # Sort in alphabetical order (should also work for numbers)
29 files.sort()
30
31 # Open each file, crop, and add to batch with 3 diff mot cor params
32 for i, path in enumerate(files):
33     print("Working on file " + str(i + 1) + " / " + str(len(files)))
34
35     # get json file path for the meta data
36     meta_path = path[:-5] + ".json"
37
38     # Create a new work environment with this image sequence
39     work_env = ViewerWorkEnv.from_tiff(path, "asarray-multi", meta_path)
40
41     # set it as the current work environment
42     vi.viewer.workEnv = work_env
43     vi.update_workEnv()
44
45     # Get caiman motion correction module, hide=False to not show GUI
46     mc_module = get_module("caiman_motion_correction", hide=True)
47
48     # Set name for this video file
49     name = os.path.basename(path)[-5]
50     params["item_name"] = name
51
52     # First variant of params
53     params["mc_kwargs"]["strides"] = (196, 196)
54     params["mc_kwargs"]["overlaps"] = (98, 98)
55
56     # Add one variant of params for this video to the batch
57     mc_module.add_to_batch(params)
58
59     # Try another variant of params

```

(continues on next page)

(continued from previous page)

```

60  params["mc_kwargs"]["strides"] = (256, 256)
61  params["mc_kwargs"]["overlaps"] = (128, 128)
62
63  # Set these params and add to batch
64  mc_module.add_to_batch(params)
65
66  # Try one more variant of params
67  params["mc_kwargs"]["strides"] = (296, 296)
68  params["mc_kwargs"]["overlaps"] = (148, 148)
69
70  # Set these params and add to batch
71  mc_module.add_to_batch(params)
72
73  # If you want to process the batch after adding the items uncomment the following lines
74  #bm = get_batch_manager()
75  #bm.process_batch(clear_viewers=True)

```

## Crop and add items

This example shows how to crop videos prior to adding them as batch items. This is useful if you want to crop-out large unchanging regions of your movides. It uses either simple thresholding or spectral saliency on a standard deviation projection to determine the bounding box for cropping.

### See also:

This example uses the *Caiman Motion Correction Module API*, *ViewerWorkEnv API*, and *Batch Manager API*

```

1  # Import glob so we can get all tiff files in a dir
2  from glob import glob
3  # Import os to get filenames from paths
4  import os
5
6  # Just get a shortcut reference to the auto_crop function
7  auto_crop = image_utils.auto_crop
8
9  # Parameters for cropping, these should work for everything
10 # These worked well for various different constructs
11 # If you get non-specific cropping (too much black) try "method" as "spectral_saliency"
12 ↪ (See below)
13 crop_params = \
14 {
15     "projection":      "max+std",
16     "method":         "threshold",
17     "denoise_params": (32, 32),
18 }
19
20 # Spectral saliency is another method
21 # You can try and play around with the parameters
22 # If the cropping is insufficient, you can set "projection" to just "max" or "std"
23 # If you get too much junk blackness around the animal try increasing denoise_params
24 # or reduce padding. Default padding is 30 (when nothing is specified like above)
25 crop_params_salient = \

```

(continues on next page)

(continued from previous page)

```

25 {
26     "projection":      "max+std",
27     "method":         "spectral_saliency",
28     "denoise_params": (16, 16),
29     "padding":        40
30 }
31
32 # Motion correction params.
33 mc_kwargs = \
34 {
35     "max_shifts":      (6, 6),
36     "niter_rig":      2,
37     "max_deviation_rigid": 3,
38     "strides":        (196, 196),
39     "overlaps":       (98, 98),
40     "upsample_factor_grid": 4,
41     "gSig_filt":      (10, 10) # Set to `None` for 2p data
42 }
43
44 params = \
45 {
46     'mc_kwargs':      mc_kwargs, # the kwargs we set above
47     'item_name':      "will set later per file",
48     'output_bit_depth': "Do not convert" # can also set to `8` or `16` if you want the_
↳ output in `8` or `16` bit
49 }
50
51 # Path to the dir containing images
52 files = glob("/full_path_to_raw_images/*.tiff")
53 # Sort in alphabetical order (should also work for numbers)
54 files.sort()
55
56 # Open each file, crop, and add to batch with 3 diff mot cor params
57 for i, path in enumerate(files):
58     print("Working on file " + str(i + 1) + " / " + str(len(files)))
59
60     # get json file path for the meta data
61     meta_path = path[:-5] + ".json"
62
63     # Create a new work environment with this image sequence
64     work_env = ViewerWorkEnv.from_tiff(path, "asarray-multi", meta_path)
65
66     # autocrope the image sequence in the work environment
67     raw_seq = work_env.imgdata.seq
68     # Auto crop the image sequence
69     print("Cropping file: " + str(i + 1))
70
71     cropped = auto_crop.crop(raw_seq, crop_params)
72     # Set work env img seq to the cropped one and update
73     work_env.imgdata.seq = cropped
74
75     # update the work environment

```

(continues on next page)



(continued from previous page)

```

76 vi.viewer.workEnv = work_env
77 vi.update_workEnv()
78
79 # Get caiman motion correction module, hide=False to not show GUI
80 mc_module = get_module("caiman_motion_correction", hide=True)
81
82 # Set name for this video file
83 name = os.path.basename(path)[-5]
84 params["item_name"] = name
85
86 # First variant of params
87 params["mc_kwargs"]["strides"] = (196, 196)
88 params["mc_kwargs"]["overlaps"] = (98, 98)
89
90 # Add one variant of params for this video to the batch
91 mc_module.add_to_batch(params)
92
93 # Try another variant of params
94 params["mc_kwargs"]["strides"] = (256, 256)
95 params["mc_kwargs"]["overlaps"] = (128, 128)
96
97 # Set these params and add to batch
98 mc_module.add_to_batch(params)
99
100 # Try one more variant of params
101 params["mc_kwargs"]["strides"] = (296, 296)
102 params["mc_kwargs"]["overlaps"] = (148, 148)
103
104 # Set these params and add to batch
105 mc_module.add_to_batch(params)
106
107 # If you want to process the batch after adding the items uncomment the following lines
108 #bm = get_batch_manager()
109 #bm.process_batch(clear_viewers=True)

```

## 1.15 CNMF

Perform CNMF using the implementation provided by the CaImAn library. This module basically provides a GUI for parameter entry.

### I highly recommend going through the following before using this module

- **CNMFE builds upon CNMF** Pnevmatikakis, E. A., Gao, Y., Soudry, D., Pfau, D., Lacefield, C., Poskanzer, K., ... Paninski, L. (2014). A structured matrix factorization framework for large scale calcium imaging data analysis, 1–16.  
Pnevmatikakis, E. A., Soudry, D., Gao, Y., Machado, T. A., Merel, J., Pfau, D., ... Paninski, L. (2016). Simultaneous Denoising, Deconvolution, and Demixing of Calcium Imaging Data. *Neuron*, 89(2), 285.
- **CaImAn demo notebook, the implementation in Mesmerize is basically from the demo. The second half of the notebook d**  
[https://github.com/flatironinstitute/CaImAn/blob/master/demos/notebooks/demo\\_pipeline.ipynb](https://github.com/flatironinstitute/CaImAn/blob/master/demos/notebooks/demo_pipeline.ipynb)

**CNMF**
🖼️ 🗖️

Order of the autoregressive system

p:

Global number of background components

gnb:

Merging threshold, max correlation allowed

merge\_thresh:

Half size of patch in pixels

rf:

amount of overlap between the patches in pixels

stride\_cnmf:

Number of neurons/cell per patch

k:

Expected half size of neurons (x, y)

gSig:

ssub:  | tsub:

method\_init

Ain:

Use CNMF kwargs

Signal to noise ratio for accepting a component

min\_SNR:

Space correlation threshold for accepting a component

rval\_thr:

Threshold for CNN based classifier

cnn\_thr:

cnn\_lowest

Average decay time of calcium spikes (seconds)

decay\_time:

Use evaluation params

perform second iteration of cnmf by re-fitting the components

refit

### Parameters

Please see the CaImAn demo notebook mentioned above to understand the parameters. The Caiman docs also provide descriptions of the parameters: <https://caiman.readthedocs.io/>

You can also enter parameters for CNMF and component evaluation as keyword arguments (kwargs) in the the respective text boxes if you select “Use CNMF kwargs” or “Use evaluation params”. This is useful if you want to enter parameters that cannot be entered in the GUI for example. **Use single quotes if you want to enter string kwargs, do not use double quotes.**

### 1.15.1 Usage

This module adds a “CNMF” *item* to the batch. Set the desired parameters (see Caiman docs & demos) and then enter a name to add it as an *item* to the batch. After the batch item is processed, **double-click the batch item** to import the CNMF output into a Viewer. You can then annotate and curate ROIs, and add the data as a *Sample* to your project.

**See also:**

This modules uses the *Batch Manager*.

**Warning:** It’s recommended to open a new Viewer when you want to import 3D CNMF data. Full garbage collection of 3D data in the Viewer Work environment is a WIP for when you want to clear & import 3D data into the same viewer. However when you close the Viewer entirely it is garbage collected entirely.

---

**Note:** The parameters used for CNMF are stored in the work environment of the viewer and this log is carried over and saved in *Project Samples* as well. To see the parameters that were used for CNMF in the viewer, execute `get_workEnv().history_trace` in the viewer console and look for the ‘cnmf’ entry.

---

**Warning:** Importing several *thousands* of ROIs into the Viewer can take 15-30 minutes. You will be able to track the progress of the import in the Viewer Window’s status bar.

**Warning:** If you’re using Windows, large *memmap* files will linger in your batch dir or work dir, you can clean them out periodically.

### 1.15.2 Script usage

A script can be used to add CNMF batch items. This is much faster than using the GUI. This example sets the work environment from the output of a batch item. See the *Caiman Motion Correction script usage examples* for how to load images if you want to add CNMF items from images that are not in a batch.

**See also:**

*Script Editor*

```
1 def reset_params():
2     # CNMF Params that we will use for each item
3     cnmf_kwargs = \
4     {
5         'p': 2,
6         'gnb': 1,
7         'merge_thresh': 0.25,
8         'rf': 70,
9         'stride': 40,
10        'k': 16,
11        'gSig': (8, 8),
12        'gSiz': (33, 33)
13    }
14
```

(continues on next page)

(continued from previous page)

```

15  # component evaluation params
16  eval_kwargs = \
17  {
18      'min_SNR': 2.5,
19      'rval_thr': 0.8,
20      'min_cnn_thr': 0.8,
21      'cnn_lowest': 0.1,
22      'decay_time': 2.0,
23  }
24
25  # the dict that will be passed to the mesmerize caiman module
26  params = \
27  {
28      "cnmf_kwargs": cnmf_kwargs,
29      "eval_kwargs": eval_kwargs,
30      "refit":      True, # if you want to perform a refit
31      "item_name":  "will set later per file",
32  }
33
34  return params
35
36  # Get the batch manager
37  bm = get_batch_manager()
38  cnmf_mod = get_module('cnmf', hide=True)
39
40  # Start index if we want to start processing the new items after they have been added
41  start_ix = bm.df.index.size + 1
42
43  # This example uses motion corrected output items from the batch manager
44  # You can also open image files directly from disk, see the motion correction
45  # script examples to see how to open images from disk.
46  for ix, r in bm.df.iterrows():
47      # Use output of items 6 - 12
48      # for example if items 6 - 12 were motion correction items
49      if ix < 6:
50          continue
51      if ix > 12: # You need to set a break point, else the batch grows infinitely
52          break
53
54      # get the first variant of params
55      params = reset_params()
56
57      # Get the name of the mot cor item
58      name = r['name']
59
60      # Set the name for the new cnmf item
61      params['item_name'] = name
62
63      # Load the mot cor output
64      bm.load_item_output(module='caiman_motion_correction', viewers=viewer, UUID=r['uuid
65      ↵'])

```

(continues on next page)

(continued from previous page)

```

66  # Set the sampling rate of the data
67  params['eval_kwargs']['fr'] = vi.viewer.workEnv.imgdata.meta['fps']
68
69  # Get the border_pix value from the motion correction output
70  # skip this if loading files that don't have NaNs on the image borders
71  history_trace = vi.viewer.workEnv.history_trace
72  border_pix = next(d for ix, d in enumerate(history_trace) if 'caiman_motion_
↪ correction' in d)['caiman_motion_correction']['bord_px']
73
74  # Set the border_pix values
75  params['border_pix'] = border_pix
76  params['cnmf_kwargs']['border_pix'] = border_pix
77
78  # Add to batch
79  cnmf_mod.add_to_batch(params)
80
81  # change some of the params and add this variant to batch
82  params['cnmf_kwargs']['gSig'] = (10, 10)
83  params['cnmf_kwargs']['gSiz'] = (41, 41)
84
85  # Add to batch with this params variant
86  cnmf_mod.add_to_batch(params)
87
88  # another parameter variant
89  params['eval_kwargs']['rval_thr'] = 0.7
90  params['eval_kwargs']['min_cnn_thr'] = 0.65
91
92  # Add to batch with this params variant
93  cnmf_mod.add_to_batch(params)
94
95  # Cleanup the work environment
96  vi._clear_workEnv()
97
98  # Uncomment the last two lines to start the batch as well
99  #bm.process_batch(start_ix, clear_viewers=True)

```

## 1.16 CNMF 3D

Perform 3D CNMF using the implementation provided by the CaImAn library. This module basically provides a GUI for parameter entry.

**I highly recommend going through the following before using this module**

- **CNMF builds upon CNMF** Pnevmatikakis, E. A., Gao, Y., Soudry, D., Pfau, D., Lacefield, C., Poskanzer, K., ... Paninski, L. (2014). A structured matrix factorization framework for large scale calcium imaging data analysis, 1–16.  
Pnevmatikakis, E. A., Soudry, D., Gao, Y., Machado, T. A., Merel, J., Pfau, D., ... Paninski, L. (2016). Simultaneous Denoising, Deconvolution, and Demixing of Calcium Imaging Data. *Neuron*, 89(2), 285.
- **CaImAn demo notebook, the implementation in Mesmerize is basically from the demo.** [https://github.com/flatironinstitute/CaImAn/blob/master/demos/notebooks/demo\\_caiman\\_cnmf\\_3D.ipynb](https://github.com/flatironinstitute/CaImAn/blob/master/demos/notebooks/demo_caiman_cnmf_3D.ipynb)

**CNMF 3D**

p: 2

rval threshold: 0.70

Use patches

rf: 25

stride: 15

min SNR: 2.50

decay time: 2.00

k: 5

gSig, (x, y z): 3 3 3

merge threshold: 0.80

Use CNMF kwargs

Use evaluation params

refit

Keep memmap of this batch item

Use memmap from previous batch item

Enter UUID

Enter name

Add to batch

### Parameters

Please see the CaImAn demo notebook mentioned above to understand the parameters. The Caiman docs also provide descriptions of the parameters: <https://caiman.readthedocs.io/>

You can also enter parameters for CNMF and component evaluation as keyword arguments (kwargs) in the the respective text boxes if you select “Use CNMF kwargs” or “Use evaluation params”. This is useful if you want to enter parameters that cannot be entered in the GUI for example. **Use single quotes if you want to enter string kwargs, do not use double quotes.**

**Note:** The parameters used for 3D CNMF are stored in the work environment of the viewer and this log is carried over and saved in *Project Samples* as well. To see the parameters that were used for 3D CNMF in the viewer, execute

`get_workEnv().history_trace` in the viewer console and look for the 'cnmf\_3d' entry.

---

**Warning:** Importing several *thousands* of ROIs into the Viewer can take 15-30 minutes. You will be able to track the progress of the import in the Viewer Window's status bar.

### 1.16.1 Usage

This module adds a "CNMF\_3D" *item* to the batch. Set the desired parameters (see Caiman docs & demos) and then enter a name to add it as an *item* to the batch. After the batch item is processed, **double-click the batch item** to import the CNMF output into a Viewer. You can then annotate and curate ROIs, and add the data as a *Sample* to your project.

**See also:**

This modules uses the *Batch Manager*.

**Warning:** It's recommended to open a new Viewer when you want to import 3D CNMF data. Full garbage collection of 3D data in the Viewer Work environment is a WIP for when you want to clear & import 3D data into the same viewer. However when you close the Viewer entirely it is garbage collected entirely.

### 1.16.2 Script Usage

A script can be used to add CNMF batch items. This is much faster than using the GUI. This example sets the work environment from the output of a batch item.

**See also:**

*Script Editor*

This example loads 3D sequences from disk & adds them to a batch with 3 parameter variants.

```
1 # just so we can reset the params for each new image file
2 def reset_params():
3     # CNMF Params that we will use for each item
4     cnmf_kwargs = \
5     {
6         'p': 2,
7         'merge_thresh': 0.8,
8         'k': 50,
9         'gSig': (10, 10, 1),
10        'gSiz': (41, 41, 4)
11    }
12
13    # component evaluation params
14    eval_kwargs = \
15    {
16        'min_SNR': 3.0,
17        'rval_thr': 0.75,
18        'decay_time': 1.0,
19    }
20
```

(continues on next page)

(continued from previous page)

```

21  # the dict that will be passed to the mesmerize caiman module
22  params = \
23  {
24      "cnmf_kwargs":  cnmf_kwargs,
25      "eval_kwargs":  eval_kwargs,
26      "refit":        True, # if you want to perform a refit
27      "item_name":    "will set later per file",
28      "use_patches":  False,
29      "use_memmap":   False, # re-use the memmap from a previous batch item, reduces_
↪ computation time
30      "memmap_uuid":  None, # UUID (as a str) of the batch item to use the memmap_
↪ from
31      "keep_memmmmap": False # keep the memmap of this batch item
32
33  }
34
35  return params
36
37  # get the 3d cnmf module
38  cnmf_mod = get_module('cnmf_3d', hide=True)
39
40  # Path to the dir containing images
41  files = glob("/full_path_to_raw_images/*.tiff")
42  # Sort in alphabetical order (should also work for numbers)
43  files.sort()
44
45  # Open each file, crop, and add to batch with 3 diff mot cor params
46  for i, path in enumerate(files):
47      print("Working on file " + str(i + 1) + " / " + str(len(files)))
48
49      # get json file path for the meta data
50      meta_path = path[:-5] + ".json"
51
52      # Create a new work environment with this image sequence
53      vi.viewer.workEnv = ViewerWorkEnv.from_tiff(path=path, # tiff file path
54                                                  method='imread', # use imread
55                                                  meta_path=meta_path, # json metadata_
↪ file path
56                                                  axes_order=None) # default axes order
57                                                  # see Mesmerize_
↪ Tiff file module docs for more info on axes order
58
59      # update the work environment
60      vi.update_workEnv()
61
62      # get the first variant of params
63      params = reset_params()
64
65      # Set name for this video file
66      name = os.path.basename(path)[-5]
67      params["item_name"] = name
68

```

(continues on next page)



(continued from previous page)

```
69 # add batch item with one variant of params
70 u = cnmf_mod.add_to_batch(params)
71
72 # add the same image but change some params
73 params["cnmf_kwargs"]["gSig"] = (12, 12, 1)
74 params["eval_kwargs"]["min_SNR"] = 2.5
75
76 # use the same memmap as the previous batch item
77 # since it's the same image
78 params["use_memmap"] = True
79 params["memmap_uuid"] = str(u)
80
81 # add this param variant to the batch
82 cnmf_mod.add_to_batch(params)
83
84 # one more variant of params
85 params["eval_kwargs"]["min_SNR"] = 2.0
86
87 # add this param variant to the batch
88 cnmf_mod.add_to_batch(params)
```

## 1.17 CNMFE

Perform CNMFE using the implementation provided by the CaImAn library.

**I highly recommend going through the following before using this module**

- **The paper on CNMF-E** Zhou, P., Resendez, S. L., Rodriguez-Romaguera, J., Jimenez, J. C., Neufeld, S. Q., Stuber, G. D., ... Paninski, L. (2016). Efficient and accurate extraction of in vivo calcium signals from microendoscopic video data. *ELife*, 1–37.
- **CNMFE builds upon CNMF** Pnevmatikakis, E. A., Gao, Y., Soudry, D., Pfau, D., Lacefield, C., Poskanzer, K., ... Paninski, L. (2014). A structured matrix factorization framework for large scale calcium imaging data analysis, 1–16.  
  
Pnevmatikakis, E. A., Soudry, D., Gao, Y., Machado, T. A., Merel, J., Pfau, D., ... Paninski, L. (2016). Simultaneous Denoising, Deconvolution, and Demixing of Calcium Imaging Data. *Neuron*, 89(2), 285.
- **CaImAn CNMF-E demo notebook, the implementation in Mesmerize is basically from the demo**  
[https://github.com/flatironinstitute/CaImAn/blob/master/demos/notebooks/demo\\_pipeline\\_cnmfE.ipynb](https://github.com/flatironinstitute/CaImAn/blob/master/demos/notebooks/demo_pipeline_cnmfE.ipynb)

CNMF-E
⊞ ⊠

### Inspect Correlation and PNR

gaussian width of a 2D gaussian kernel, which approximates a neuron 3 times less than the average diameters of a neuron (pixels)

gSig:

Stop here:

### CNMF-E

Ain:

p:

Minimum correlation of peak

min\_corr:

Minimum peak to noise ratio

min\_pnr:

Adaptive way to set threshold on the transient size

Half size of patch

rf:

Overlap of patches (at least 4 times the size of a neuron/cell)

overlap:

Global number of background components

gnb:

Background components per patch

nb\_patch:

Number of neurons/cell per patch

k:

ssub:  | tsub:

low\_rank\_background

ring\_size\_factor:

deconvolution:

merge\_thresh:

Use CNMF\_kwargs

### Evaluation params

min\_SNR:

Threshold on space consistency  
If lower more components will be accepted, potentially with worse quality

r\_values\_min:

Average decay time of calcium spikes (seconds)

decay\_time:

Use evaluation params

## Parameters

**Ain:** Seed spatial components from another CNMFE item by entering its UUID here.

Please see the CaImAn demo notebook mentioned above to understand the rest of the parameters. The Caiman docs also provide descriptions of the parameters: <https://caiman.readthedocs.io/>

You can also enter parameters for CNMF and component evaluation as keyword arguments (kwargs) in the the respective text boxes if you select “Use CNMF kwargs” or “Use evaluation params”. This is useful if you want to enter parameters that cannot be entered in the GUI for example. **Use single quotes if you want to enter string kwargs, do not use double quotes.**

### 1.17.1 Usage

This module creates two types of batch items, one where you can inspect the Correlation & PNR images and another that performs CNMFE and extracts components. Here is an outline of typical usage:

- Enter a *gSig* parameter value and a name for “Inspect Correlation and PNR”, the text entry for “Stop here”. Click “Add to batch”. Run the batch item.
- Double-click the batch item, you will be presented with a GUI to help optimize *min\_corr* and *min\_pnr*. For the correlation image use the *vmin* slider to optimize the separation of cells and set the *min\_corr* parameter to this value. Likewise, optimize the value for the PNR until the PNR image mostly contains regions that show real signal and no or few regions that are likely to be just noise and set this *vmin* value as the *min\_pnr* parameter. You may need to try slightly different variations to optimize the parameters.

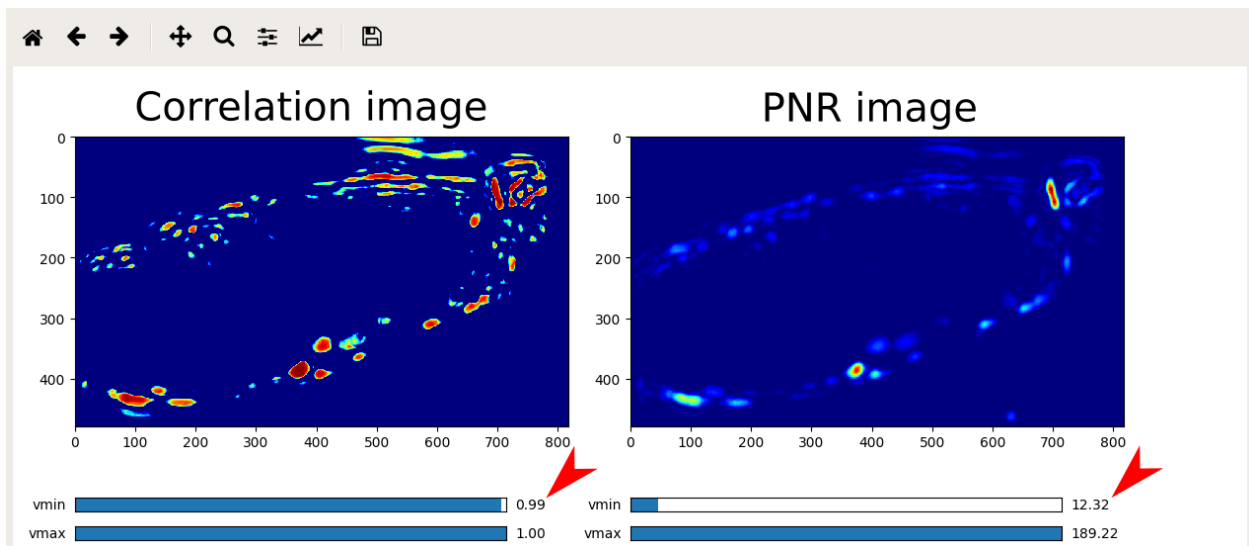

- Enter the rest of the parameters and give a name under “Perform CNMF-E”, click “Add to batch” and run the item.
- Double-click the batch item and you will be presented with 3 options. The first option will display the correlation-pnr images and the second option is currently non-functional (matplotlib Qt issue). The last option will import the components extracted by CNMFE into an open Viewer. The components are managed by the ROI Manager.

**See also:**

*ROI Manager*

**See also:**

This modules uses the *Batch Manager*.

**Note:** The parameters used for CNMFE are stored in the work environment of the viewer and this log is carried over and saved in *Project Samples* as well. To see the parameters that were used for CNMFE in the viewer, execute `get_workEnv().history_trace` in the viewer console and look for the ‘cnmfe’ entry.

**Warning:** If you’re using Windows, large *memmap* files will linger in your batch dir or work dir, you can clean them out periodically.

## 1.17.2 Script Usage

A script can be used to add CNMFE batch items. This is much faster than using the GUI.

**See also:**

*Script Editor.*

### Add Corr PNR items

Add Corr PNR batch items from a batch that contains motion corrected items. This example add 2 variants of parameters (just gSig) for each motion corrected item.

**See also:**

This example uses the *Caiman CNMFE module API* and *Batch Manager API*

**See also:**

*Caiman Motion Correction script usage examples* for how to load images if you want to add Corr PNR items from images that are not in a batch.

```

1  # Get the batch manager
2  bm = get_batch_manager()
3
4  # Get the CNMFE module
5  cnmfe_mod = get_module('cnmfe', hide=True)
6
7  # Start index to start processing the new items after they have been added
8  start_ix = bm.df.index.size + 1
9
10 for ix, r in bm.df.iterrows():
11     if ix == start_ix:
12         break
13
14     # Load the output of the motion corrected batch item
15     # The output will load into the viewer that this script
16     # is running in.
17     bm.load_item_output(module='caiman_motion_correction', viewers=viewer, UUID=r[
↪ 'uuid'])
18
19     # Get the currently set params
20     # You just need the dict with all the correct keys
21     # You will just modify the "gSig" and "item_name" keys
22     params = cnmfe_mod.get_params(item_type='corr_pnr', group_params=True)
23
24     # Get the name of the mot cor item
25     name = r['name']
26     params['item_name'] = name
27
28     params['border_pix'] = border_pix
29
30     # Set the gSig and name params
31     params['corr_pnr_kwargs']['gSig'] = 8
32
33     # Add to batch

```

(continues on next page)

(continued from previous page)

```
34     cnmfe_mod.add_to_batch_corr_pnr(params)
35
36     # Another variant of params
37     params['corr_pnr_kwargs']['gSig'] = 10
38
39     # Add to batch with this variant of params
40     cnmfe_mod.add_to_batch_corr_pnr(params)
41
42     # Cleanup the work environment
43     vi._clear_workEnv()
44
45     # Start the batch from the start_ix
46     bm.process_batch(start_ix, clear_viewers=True)
```

## CNMFE

### 1.18 Caiman HDF5 Importer

You can import HDF5 files containing CNMF results that were produced externally by Caiman. The ROIs produced by CNMF, 3D-CNMF or CNMFE will be imported into the current *work environment* and placed onto the image that is currently open.

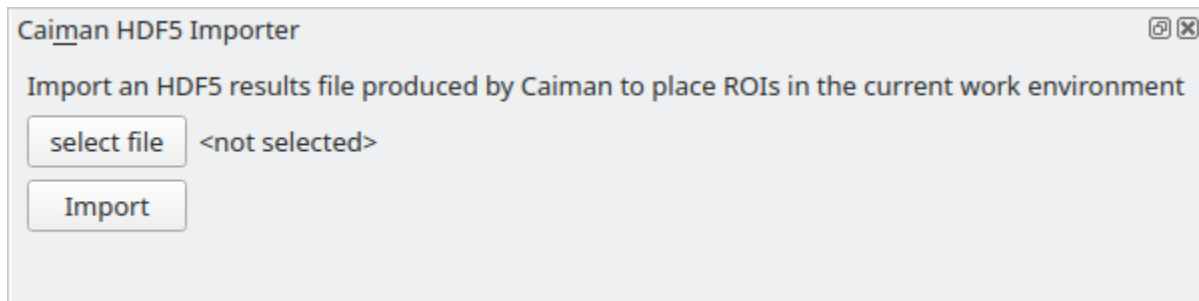

You can also use this module through the *viewer console*, or in the *Script Editor* instead of clicking buttons.

#### Example

```
1 # get the module, hide the GUI
2 caiman_importer = get_module('caiman_importer', hide=True)
3
4 # import the file
5 caiman_importer.import_file('/path/to/file.hdf5')
```

## 1.19 Suite2p Importer

You can load Suite2p output files to import ROIs into the current *work environment*. This places the Suite2p-derived ROIs onto the image that is currently open.

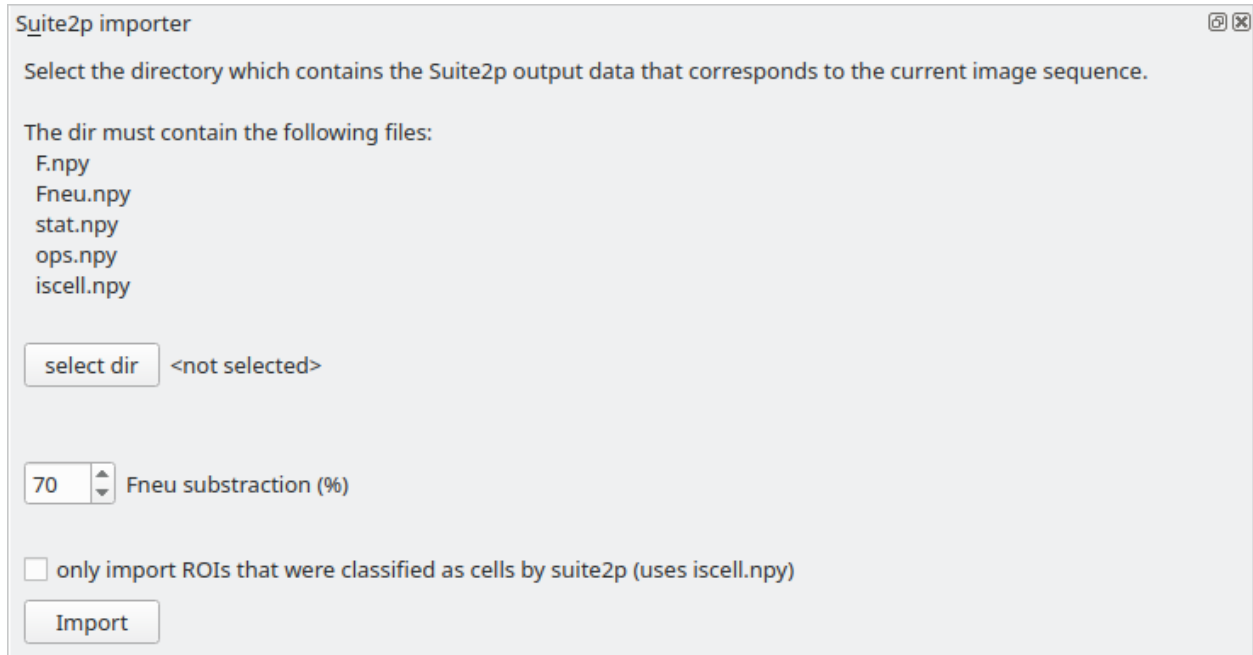

### 1.19.1 Video Tutorial

### 1.19.2 Script Usage

You can also use this module through the *viewer console*, or in the *Script Editor* instead of clicking buttons.

#### Example

```

1 # get the module, hide the GUI
2 s2p_importer = get_module('suite2p_importer', hide=True)
3
4 # set the path to the dir containing the suite2p output files
5 s2p_importer.data.set_dir('/path/to/dir')
6
7 # set the amount of neuropil contamination to subtract
8 s2p_importer.data.Fneu_sub = 0.7
9
10 # import the suite2p data into the current work environment
11 s2p_importer.import_rois()
12
13 # clear the data from the importer before importing another directory
14 # this doesn't do anything to the viewer work environment, just clears the importer data
15 s2p_importer.data.clear()

```

## 1.20 Nuset Segmentation

Deep learning based segmentation, useful for nuclear localized indicators. ROIs segmented through this module can be imported into the Viewer Work Environment.

---

**Note:** If you use this tool, please cite the Nuset paper in addition to citing Mesmerize: Yang L, Ghosh RP, Franklin JM, Chen S, You C, Narayan RR, et al. (2020) NuSeT: A deep learning tool for reliably separating and analyzing crowded cells. PLoS Comput Biol 16(9): e1008193. <https://doi.org/10.1371>

---

### 1.20.1 Parameters

#### Projection

Choose a projection which maximizes the visibility of your regions of interest

#### Pre-process

| Parameter       | Description                                                                                                    |
|-----------------|----------------------------------------------------------------------------------------------------------------|
| do_preprocess   | perform pre-processing                                                                                         |
| do_sigmoid      | perform <a href="#">sigmoid correction</a>                                                                     |
| sigmoid_cutoff  | cutoff, lower values will increase the exposure                                                                |
| sigmoid_gain    | gain, high values can be thought of as increasing contrast                                                     |
| sigmoid_invert  | invert the image if necessary. Regions of interesting should be bright, background should be dark              |
| do_equalize     | perform <a href="#">adaptive histogram equalization</a>                                                        |
| equalize_lower  | Set a lower limit, this helps remove background & increase contrast                                            |
| equalize_upper  | Upper limit for the histogram                                                                                  |
| equalize_kernel | kernel size, increase if the pre-processed image is grainy. Start with a value ~1/16-1/8 the size of the image |

#### NuSeT

| Parameter     | Description                                                                                                                  |
|---------------|------------------------------------------------------------------------------------------------------------------------------|
| watershed     | <a href="#">watershed the image</a> , useful if your cells are tightly packed. Uncheck if cells are large and/or sparse.     |
| min_score     | Decreasing this value will cause more regions to be found, i.e. cells tend to split more                                     |
| nms_threshold | Increasing this value will cause more regions to be found, i.e. cells tend to split more                                     |
| rescale_ratio | Use smaller values less than 1.0 if you have large bright cells, If you have smaller or dim cells use values higher than 1.0 |

---

**Note:** min\_score & nms\_threshold work in opposing ways

---

---

**Note:** Segmentation will utilize all threads available on your system (regardless of the value set in your System Configuration). However it only takes a few seconds or a few minutes if segmenting a large 3D stack.

---

---

**Note:** high **rescale\_ratio** values will increase the time required for segmentation. Values around 3.0 take about ~1 minute for 512x512 sized images on ~16 core CPUs.

---

## Post-process

### 1.20.2 Export

If you export using a Convex Hull masks containing only a few pixels, which may be noise, will be removed.

---

**Note:** Segmentation will utilize all threads available on your system (regardless of the value set in your System Configuration). However it only takes a few seconds if exporting a 2D image, and make take ~10 minutes if exporting a large 3D stack.

---

## 1.21 Script Editor

A simple text editor for writing scripts that can be run in the *viewer console*

The scripts are simply ran in the *viewer console* and all output will also be visible in the *viewer console*.



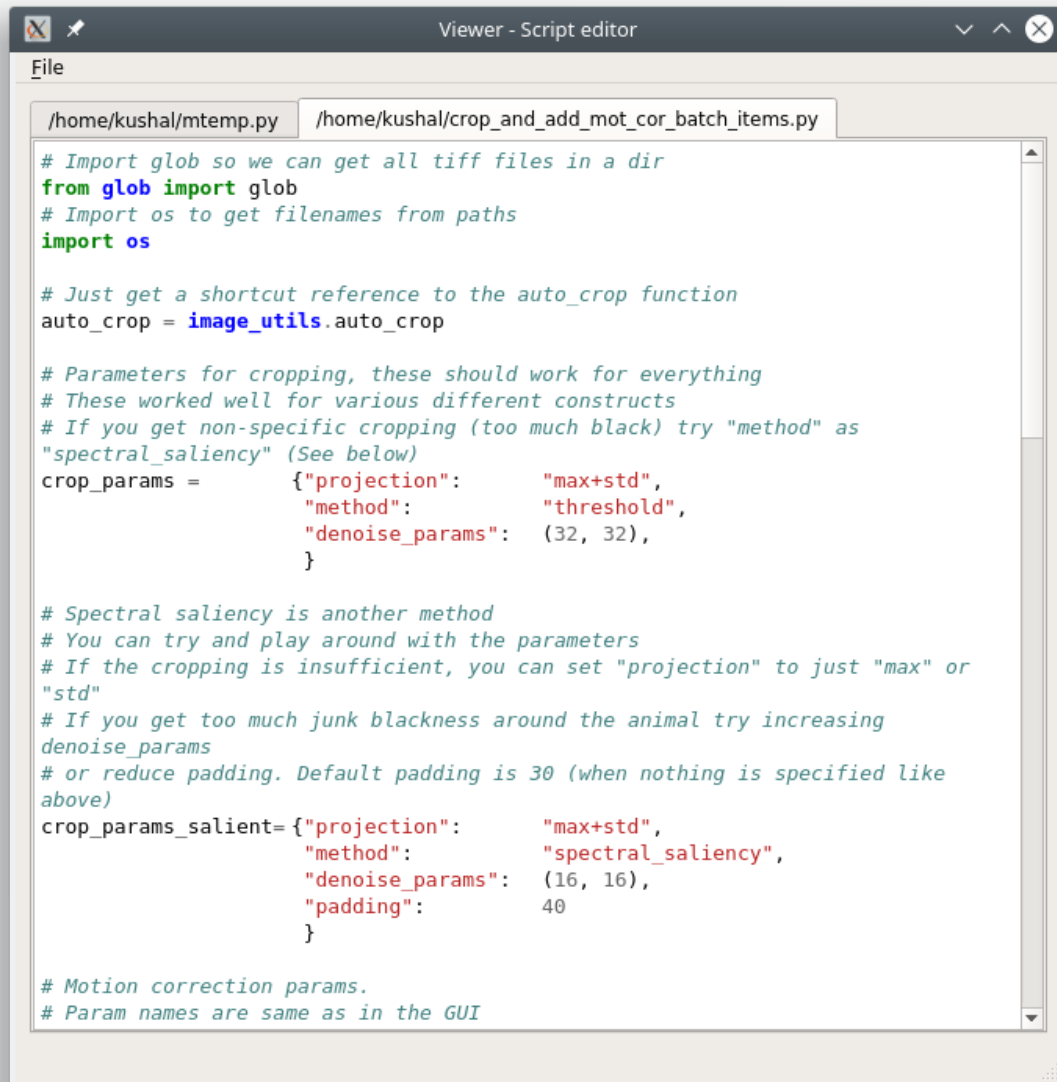

```
Viewer - Script editor
File
/home/kushal/mtemp.py /home/kushal/crop_and_add_mot_cor_batch_items.py

# Import glob so we can get all tiff files in a dir
from glob import glob
# Import os to get filenames from paths
import os

# Just get a shortcut reference to the auto_crop function
auto_crop = image_utils.auto_crop

# Parameters for cropping, these should work for everything
# These worked well for various different constructs
# If you get non-specific cropping (too much black) try "method" as
"spectral_saliency" (See below)
crop_params = {"projection": "max+std",
               "method": "threshold",
               "denoise_params": (32, 32),
               }

# Spectral saliency is another method
# You can try and play around with the parameters
# If the cropping is insufficient, you can set "projection" to just "max" or
"std"
# If you get too much junk blackness around the animal try increasing
denoise_params
# or reduce padding. Default padding is 30 (when nothing is specified like
above)
crop_params_salient={"projection": "max+std",
                    "method": "spectral_saliency",
                    "denoise_params": (16, 16),
                    "padding": 40
                    }

# Motion correction params.
# Param names are same as in the GUI
```

**See also:**

*Viewer Core API*

**Warning:** There is no auto-save function

## 1.22 Femtonics Importers

You can import `.mes` and `.mesc` files containing data recorded by a Femtonics microscope. Access these modules in Viewer through Modules -> Load images -> Femtonics

### 1.22.1 mesc files

You can explore the contents of a `.mesc` file using the module's GUI shown on the left in the image below. To load a recording just double click on a selection under *Channel*. If the recording is an image sequence it will be imported into the Viewer. If the recording is a Curve a plot will open in a new window to display the curve.

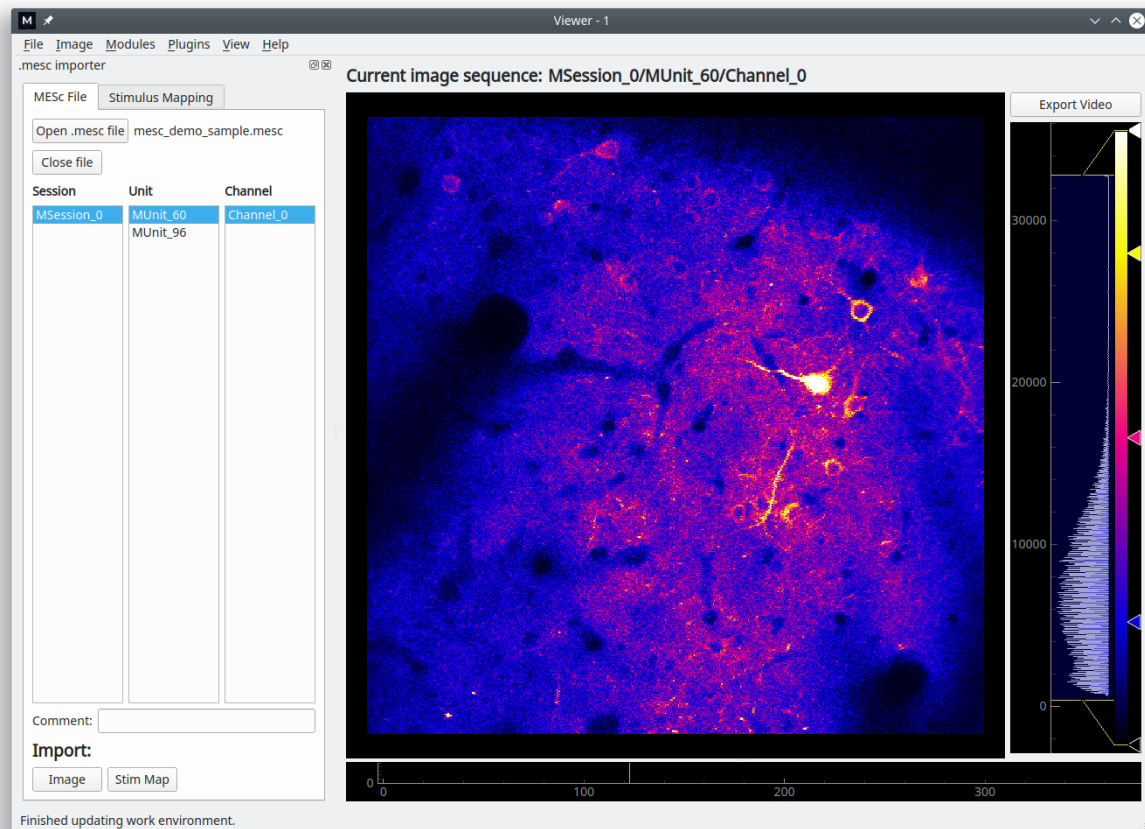

### 1.22.2 mes files

You can import recordings from a `.mes` using this module, and you can also map metadata from the microscope to specific stimuli.

To load an image sequence into the Viewer work environment, just double click the desired recording from the list.

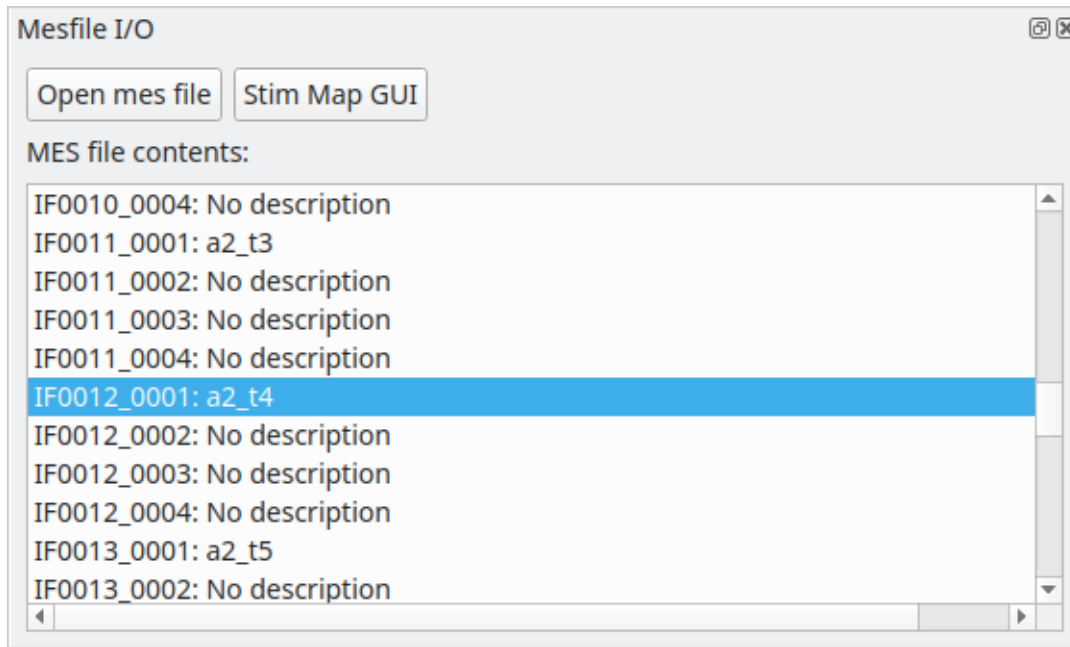

You can map voltage data from various microscope channels (such as auxiliary outputs) to specific stimuli. The stimulus types which you can choose from will correspond to the Stimulus Type columns in your *Project Configuration*. You can view & edit the imported stimulus data using the *Stimulus Mapping Module*

Stimulus Mapping

AUXo3 Sh1 PMT\_EN PMTenUG

Choose Stimulus Type (from project config):

0.0 Stimulus Name

1.5 Stimulus Name

2.7 Stimulus Name

3.2 Stimulus Name

1.0 Stimulus Name

2.1 Stimulus Name

3.8 Stimulus Name

4.5 Stimulus Name

Import Export Cancel Set all maps

## 1.23 Flowchart Overview

The flowchart allows you to analyze samples in your project and create plots by arranging analysis nodes. Each node takes an input, performs an operation, and produces an output. For example the *Derivative* node takes use-specified numerical arrays, computes the derivative of these arrays, and then outputs the result.

The Flowchart is based on the [pyqtgraph flowchart widgets](#)

### Flowchart Window

Right click in the black area to add nodes

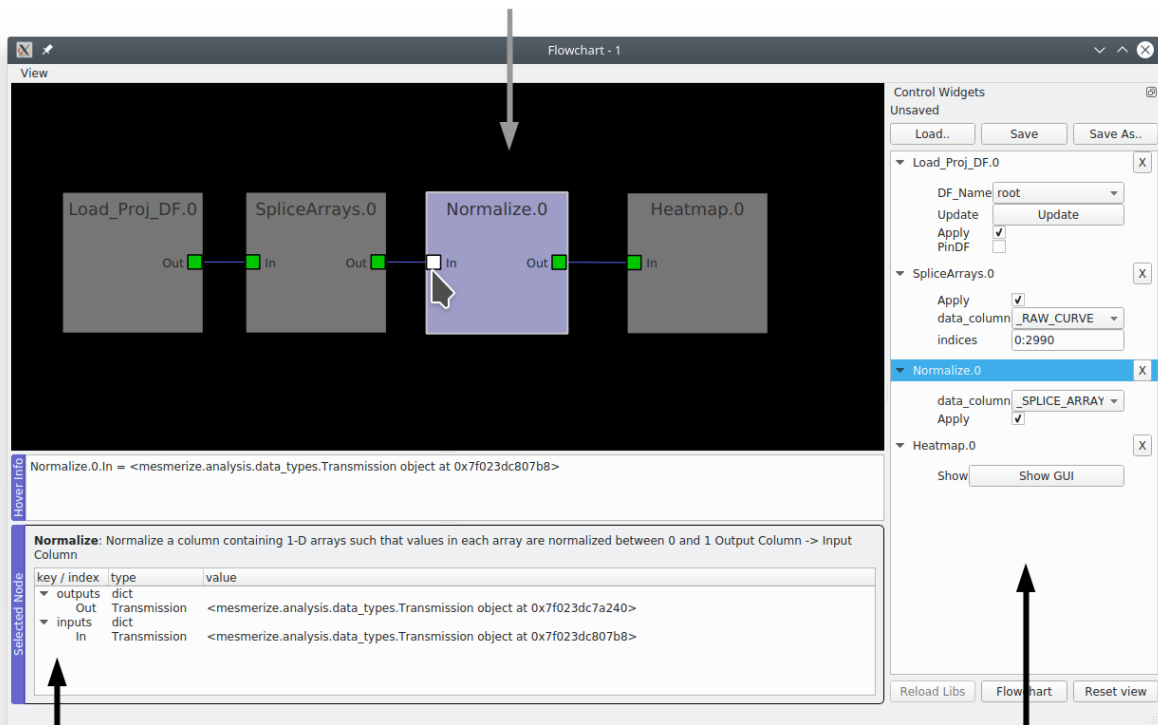

Click on a node to view information on it here. If the node is unable to perform its operation the traceback will be printed here.

Parameters for node operations

**Add node:** Right click -> Add node -> Choose from selection

Click on a node to highlight the Control Widget

**Remove node:** Right click -> Remove node

**Connecting nodes:** Click on a node terminal and drag to another terminal

**Save the flowchart layout:** Click “Save as...” to save the layout to a new file. You must specify the file extension as “.fc”. If you save this file within the “flowcharts” directory of your project it will show up in the *Welcome Window* when you open your project.

---

**Note:** This does not save the data, use the *Save* node to save data.

---

**Warning:** Due to a weird Qt or pyqtgraph bug certain parameter values (such as those in drop-down menus) can’t be saved. Similarly, parameters values are lost when you save to an existing .fc file. If you’re interested take a look at `pyqtgraphCore.WidgetGroup`. Anyways you shouldn’t be using the flowchart layout to save this information, that’s what the History Trace in Transmission objects is for.

**Load an .fc file:** Click the “Load” button.

**Reset View button:** Reset the view, for example if you zoom out or pan too far.

### 1.23.1 Video Tutorial

Part 5 - 9 of the Main Tutorial series also provide various examples for how the flowchart can be used: [https://www.youtube.com/playlist?list=PLgofWiw2s4REPxH8bx8wZo\\_6ca435OKqg](https://www.youtube.com/playlist?list=PLgofWiw2s4REPxH8bx8wZo_6ca435OKqg)

### 1.23.2 Transmission

#### API Reference

Almost every node uses a Transmission object for input and output. A Transmission is basically a DataFrame and a History Trace (analysis log) of the data within the DataFrame.

#### Transmission DataFrame

The Transmission DataFrame is created from your *Project DataFrame* (or sub-DataFrame) by the *Load\_Proj\_DF node*. This initial DataFrame will contain the same columns as your Project DataFrame, and a new column named **\_RAW\_CURVE**. Each element (row) in the **\_RAW\_CURVE** column is a 1-D numerical array representing a single raw curve extracted from an ROI.

A new column named **\_BLOCK\_** is also added which contains the **UUID** for logging the analysis history of this newly created block of DataFrame rows, known as a *data block*. This allows you to merge Transmissions (see *Merge node*) and maintain their independent analysis logs prior to the merge.

#### Naming conventions for DataFrame columns according to the data types

- *numerical data*: single leading underscore ( **\_** ). All caps if produced by a flowchart node.
- *categorical data*: no leading underscore. All caps if produced by flowchart node.
- *special cases*: Peak detection data are placed in a column named **peaks\_bases** where each element is a DataFrame.
- *uuid data*: has uuid or UUID in the name

---

**Note:** **\_BLOCK\_** is an exception, it contains UUIDs not numerical data.

---

#### History Trace

The History Trace of a Transmission is a log containing the discrete analysis steps, known as operations, along with their parameters and any other useful information. When a flowchart node performs an operation it stores the output(s) data in the Transmission DataFrame and appends the operation parameters to this log. A separate log is kept for each data block present in the Transmission DataFrame.

### 1.23.3 Console

You have direct access to the data within the nodes through the console in the flowchart. To show the console go to View -> Console.

#### See also:

If you are unfamiliar with the console see the overview on *Consoles*

Call `get_nodes()` to view a dict of all nodes in the flowchart. You can access the output Transmission in most nodes through the attribute `t`. You can access the transmission dataframe through `t.d.f`.

#### See also:

See the *Transmission API* for more information. Sources for the nodes at [mesmerize/pyqtgraphCore/flowchart/library](https://github.com/mesmerize/pyqtgraphCore/flowchart/library).

Example, directly accessing DataFrame elements through the flowchart console

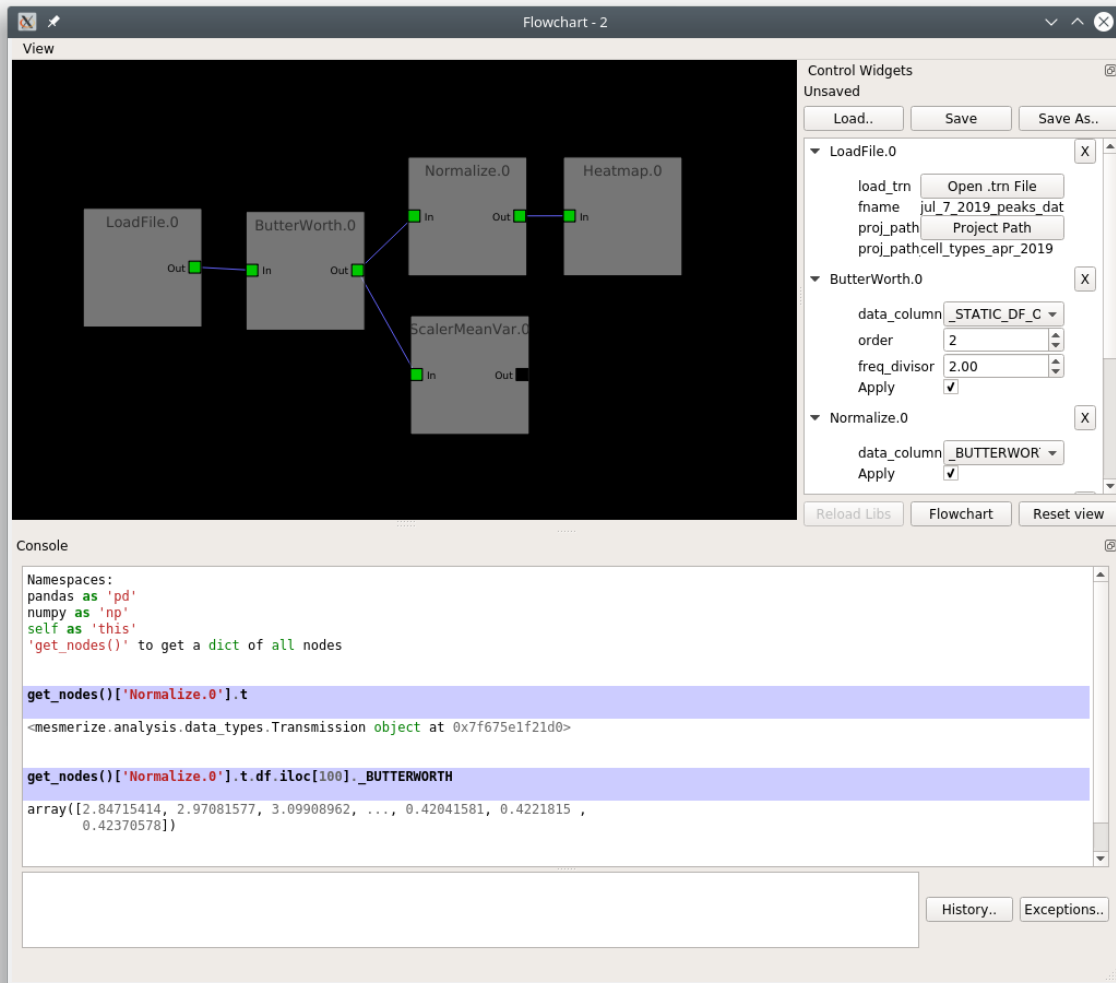

### 1.23.4 Transmission Files

You can save a Transmission files using the *Save node* and work with the data directly in scripts, jupyter notebooks etc. You can also save them through the flowchart console (and plot consoles) through *Transmission.to\_hdf5*.

#### Working with Transmission files

Load a saved Transmission instance using *Transmission.from\_hdf5*

```
1 >>> from mesmerize import Transmission
2 >>> from uuid import UUID
3
4 # load transmission file
5 >>> t = Transmission.from_hdf5('/share/data/temp/kushal/data.trn')
6 <mesmerize.analysis.data_types.Transmission at 0x7f4d42f386a0>
```

(continues on next page)

(continued from previous page)

```

7
8 # The DataFrame is always the 'df' attribute
9 >>> t.df.head()
10
11                CurvePath  ... FCLUSTER_LABELS
12 0  curves/a2--1--843c2d43-75f3-421a-9fef-483d1e...  ...      8
13 1  curves/brn3b_a6--2--21557a64-6868-4ff4-8db1-...  ...      4
14 2  curves/brn3b_a6--2--21557a64-6868-4ff4-8db1-...  ...      5
15 3  curves/brn3b_day1_3--2--ff3e95df-0e15-495c-9...  ...      8
16 4  curves/brn3b_day1_3--2--ff3e95df-0e15-495c-9...  ...      6
17
18 [5 rows x 27 columns]
19
20 # the `df` is just a pandas dataframe
21 # View a list of samples in the current file
22 >>> t.df.SampleID.unique()
23
24 array(['a2--1', 'a5--1', 'brn3b_a6--2', 'brn3b_day1_3--2',
25       'brn3b_day1_a1--2', 'brn3b_day1_a2--2', 'brn3b_day1_a4--2',
26       'brn3b_day2_a1--2', 'brn3b_day2_a1--t', 'brn3b_day2_a10--2',
27       'brn3b_day2_a2--1', 'brn3b_day2_a2--3', 'brn3b_day2_a8--1',
28       'cesa_a1--1', 'cesa_a1--2', 'cesa_a1_jan_2019--1',
29       'cesa_a1_jan_2019--2', 'cesa_a2--2', 'cesa_a6--1',
30       'cesa_a7--1', 'cesa_a7--2', 'cesa_a8--1', 'cesa_a9--1',
31       'cng_ch4_day1_a2--t1', 'cng_ch4_day1_a2--t2',
32       'cng_ch4_day2_a4--t1', 'dmrt1_day1_a2--2', 'dmrt1_day1_a4--t2',
33       'dmrt1_day1_a5--', 'dmrt1_day1_a6--t', 'dmrt1_day1_a6--t2',
34       'dmrt1_day2_a1--t1', 'dmrt1_day2_a1--t2', 'dmrt1_day2_a2--t1',
35       'dmrt1_day2_a3--t1', 'dmrt1_day2_a3--t2', 'dmrt1_day2_a4--t1',
36       'dmrt1_day2_a4--t2', 'hnk1_a5--2', 'hnk1_a6--1', 'hnk1_a7--1',
37       'hnk1_a7--2', 'hnk1_a8--1', 'pc2_a10--1', 'pc2_a11--1',
38       'pc2_a13--1', 'pc2_a14--1', 'pc2_a15--1', 'pc2_a16--1',
39       'pc2_a9--1', 'pde9_day1_a2--2', 'pde9_day1_a3--1',
40       'pde9_day1_a4--1', 'pde9_day1_a4--2', 'pde9_day2_a2--t2',
41       'pde9_day2_a2--t4', 'pde9_day2_a4--t1', 'pde9_day2_a4--t2',
42       'pde9_day2_a4--t3', 'pde9_day2_a5--t1', 'pde9_day2_a5--t2',
43       'pde9_day2_a6--t1', 'pde9_day2_a7--t1', 'pde9_day2_a7--t2'],
44       dtype=object)
45
46 # Show data associated with a single sample
47 >>> t.df[t.df['SampleID'] == 'brn3b_day1_a1--2']
48
49                CurvePath  ... FCLUSTER_LABELS
50 6  curves/brn3b_day1_a1--2--d3c5f225-7039-4abd-...  ...      6
51 7  curves/brn3b_day1_a1--2--d3c5f225-7039-4abd-...  ...      6
52 8  curves/brn3b_day1_a1--2--d3c5f225-7039-4abd-...  ...      5
53 9  curves/brn3b_day1_a1--2--d3c5f225-7039-4abd-...  ...      7
54 10 curves/brn3b_day1_a1--2--d3c5f225-7039-4abd-...  ...      5
55
56 # View the data associated with one ROI
57 # the `uuid_curve` is a unique identifier for each curve/ROI
58 >> t.df[t.df['SampleID'] == 'brn3b_day1_a1--2'].iloc[0]

```

(continues on next page)



(continued from previous page)

```

59 CurvePath          curves/brn3b_day1_a1_-_2_-_d3c5f225-7039-4abd-...
60 ImgInfoPath       images/brn3b_day1_a1_-_2_-_d3c5f225-7039-4abd-...
61 ImgPath           images/brn3b_day1_a1_-_2_-_d3c5f225-7039-4abd-...
62 ImgUUID           d3c5f225-7039-4abd-a7a1-5e9ef2150013
63 ROI_State         {'roi_xs': [554, 553, 553, 552, 552, 551, 551,...
64 SampleID          brn3b_day1_a1_-_2
65 anatomical_location      palp
66 cell_name         palp
67 comments          untagged
68 date              20190425_110103
69 dorso_ventral_axis      untagged
70 misc              {}
71 morphology        untagged
72 promoter          brn3b
73 rostro_caudal_axis      untagged
74 stimulus_name     [untagged]
75 uuid_curve        f44fbd3d-6eaa-4e19-a677-496908565fde
76 _RAW_CURVE        [81.41972198848178, 75.61356993008134, 70.0493...
77 meta              {'origin': 'AwesomeImager', 'version': '4107ff...
78 stim_maps         [[None]]
79 _BLOCK_           3e069e2d-d012-47ee-830c-93d85197e2f4
80 _SPLICE_ARRAYS    [2.646593459501195, 1.8252819116136887, 1.7422...
81 _NORMALIZE        [0.0681729940259753, 0.06533186950232853, 0.06...
82 _RFFT             [443.19357880089615, -66.8777897472859, 55.244...
83 _ABSOLUTE_VALUE   [443.19357880089615, 66.8777897472859, 55.2443...
84 _LOG_TRANSFORM    [2.646593459501195, 1.8252819116136887, 1.7422...
85 FCLUSTER_LABELS  6
86 Name: 6, dtype: object
87
88 # Show the ROI object data
89 >>> t.df[t.df['SampleID'] == 'brn3b_day1_a1_-_2'].iloc[0]['ROI_State']
90
91 {'roi_xs': array([554, 553, 553, 552, 552, 551, 551, 551, 551, 550, 550, 550, 549,
92      548, 547, 547, 546, 546, 545, 545, 544, 543, 543, 542, 541, 541,
93      540, 540, 539, 539, 538, 537, 536, 535, 534, 533, 532, 531, 531,
94      530, 529, 528, 527, 527, 526, 526, 525, 525, 525, 524, 524, 523,
95      522, 522, 521, 521, 520, 521, 521, 521, 521, 521, 521, 522, 522, 522,
96      522, 522, 522, 522, 522, 521, 521, 521, 521, 521, 521, 521, 522, 523,
97      524, 524, 525, 525, 525, 526, 526, 527, 528, 528, 529, 529, 529,
98      530, 530, 531, 532, 532, 533, 534, 535, 535, 536, 536, 537, 538,
99      539, 540, 540, 541, 541, 542, 542, 543, 544, 545, 546, 546, 547,
100     548, 548, 549, 549, 549, 549, 550, 550, 550, 550, 551, 551, 551,
101     552, 552, 552, 553, 553, 553, 554, 554, 554, 553, 554, 554, 554,
102     554, 554]),
103  'roi_ys': array([155, 156, 156, 157, 157, 158, 159, 160, 160, 161, 162, 162, 162,
104     162, 163, 163, 164, 164, 165, 165, 165, 166, 166, 166, 167, 167,
105     167, 166, 167, 167, 167, 167, 167, 167, 167, 167, 167, 167, 168, 168,
106     168, 168, 168, 168, 167, 167, 166, 166, 165, 164, 164, 163, 163,
107     163, 162, 162, 161, 161, 160, 160, 159, 158, 157, 156, 156, 155,
108     154, 153, 152, 151, 150, 150, 149, 148, 147, 146, 145, 144, 144,
109     144, 144, 143, 143, 142, 141, 141, 140, 140, 140, 139, 139, 138,
110     144, 144, 143, 143, 142, 141, 141, 140, 140, 140, 139, 139, 138,

```

(continues on next page)

(continued from previous page)

```

111         137, 137, 136, 136, 136, 135, 135, 135, 136, 136, 137, 137, 137,
112         137, 137, 138, 138, 138, 137, 137, 136, 136, 136, 136, 137, 137,
113         137, 138, 138, 139, 140, 141, 141, 142, 143, 144, 144, 145, 146,
114         146, 147, 148, 148, 149, 150, 150, 151, 151, 152, 152, 153, 154,
115         155, 155]),
116 'curve_data': (array([ 0, 1, 2, ..., 2996, 2997, 2998]),
117 array([ 81.41972199, 75.61356993, 70.04934883, ..., 195.4416283 ,
118         184.8844155 , 174.76708104])),
119 'tags': {'anatomical_location': 'palp',
120 'cell_name': 'palp',
121 'morphology': 'untagged'},
122 'roi_type': 'CNMFROI',
123 'cnmf_idx': 2}

```

## View History Log

Transmissions have a `history_trace` attribute which is an instance of `HistoryTrace`.

Use the `get_data_block_history` and `get_operations_list` methods to view the history log of a data block.

```

1  # To view the history log, first get the block UUID of the dataframe row of which you
2  ↪ want the history log
3
4  # Block UUIDs are stored in the _BLOCK_ column
5  >>> bid = t.df.iloc[10]._BLOCK_
6  >>> bid
7
8  '248a6ece-e60e-4a09-845e-188a5199d262'
9
10 # Get the history log of this data block
11 # HistoryTrace.get_operations_list() returns a list of operations, without parameters
12 # HistoryTrace.get_data_block_history() returns the operations list with the parameters
13 >>> t.history_trace.get_operations_list(bid)
14
15 ['spawn_transmission',
16  'splice_arrays',
17  'normalize',
18  'rfft',
19  'absolute_value',
20  'log_transform',
21  'splice_arrays',
22  'fcluster']
23
24 # View the entire history log with all params
25 >>> t.history_trace.get_data_block_history(bid)
26
27 [{'spawn_transmission': {'sub_dataframe_name': 'neuronal',
28 'dataframe_filter_history': {'dataframe_filter_history': ['df[~df["promoter"].isin([\
29 ↪ 'cesa', \ 'hnk1\'])]',
30         'df[~df["promoter"].isin([\ 'cesa', \ 'hnk1\'])]',
31         'df[~df["cell_name"].isin([\ 'not_a_neuron', \ 'non_neuronal', \ 'untagged', \
32 ↪ 'ependymal\'])]']}]},

```

(continues on next page)

```
30 {'splice_arrays': {'data_column': '_RAW_CURVE',
31 'start_ix': 0,
32 'end_ix': 2990,
33 'units': 'time'}},
34 {'normalize': {'data_column': '_SPLICE_ARRAYS', 'units': 'time'}},
35 {'rfft': {'data_column': '_NORMALIZE',
36 'frequencies': [0.0,
37 0.0033444816053511705,
38 0.0033444816053511705,
39 0.006688963210702341,
40 ...
41
42 # Get the parameters for the 'fcluster' operation
43 >>> fp = t.history_trace.get_operation_params(bid, 'fcluster')
44
45 # remove the linkage matrix first so we can view the other params
46 >>> fp.pop('linkage_matrix');fp
47
48 {'threshold': 8.0,
49 'criterion': 'maxclust',
50 'depth': 1,
51 'linkage_params': {'method': 'complete',
52 'metric': 'wasserstein',
53 'optimal_ordering': True}}
54
55 # Draw the analysis history as a graph
56 # This will open your default pdf viewer with the graph
57 >>> t.history_trace.draw_graph(bid, view=True)
58
59 # If you are using the API to perform analysis on
60 # transmission files, you can use the `HistoryTrace`
61 # to log the analysis history
62 # For example, add a number `3.14` to all datapoints in a curve
63 >>> t.df['_RAW_CURVE'] = t.df['_RAW_CURVE'].apply(lambda x: x + 3.14)
64
65 # Append the analysis log
66 >>> t.history_trace.add_operation(data_block_id='all', operation='addition', parameters={
  ↳ 'value': 3.14}
```

## 1.24 Nodes

### 1.24.1 Data

These nodes are for performing general data related operations

## LoadFile

### Source

Loads a save Transmission file. If you have a Project open it will automatically set the project path according to the open project. Otherwise you must specify the project path. You can specify a different project path to the project that is currently open (this is untested, weird things could happen). You should not merge Transmissions originating from different projects.

---

**Note:** You can also load a saved Transmission file by dragging & dropping it into the Flowchart area. It will create a LoadFile node with the name of the dropped.

---

| Terminal | Description                                 |
|----------|---------------------------------------------|
| Out      | Transmission loaded from the selected file. |

| Parameters | Description                                                                      |
|------------|----------------------------------------------------------------------------------|
| load_trn   | Button to choose a .trn file (Transmission) to load                              |
| proj_trns  | Load transmission file located in the project's "trns" directory                 |
| proj_path  | Button to select the Mesmerize project that corresponds to the chosen .trn file. |

---

**Note:** The purpose of specifying the Project Path when you load a save Transmission file is so that interactive plots and the *Datapoint Tracer* can find raw data that correspond to datapoints.

---

## LoadProjDF

### Source

Load the entire Project DataFrame (root) of the project that is currently open, or a sub-DataFrame that corresponds a tab that you have created in the *Project Browser*.

**Output Data Column (numerical):** `_RAW_CURVE`

Each element in this output column contains a 1-D array representing the trace extracted from an ROI.

| Terminal | Description                                                       |
|----------|-------------------------------------------------------------------|
| Out      | Transmission created from the Project DataFrame or sub-DataFrame. |

| Parameters | Description                                                           |
|------------|-----------------------------------------------------------------------|
| DF_Name    | DataFrame name. List corresponds to <i>Project Browser</i> tabs.      |
| Update     | Re-create Transmission from corresponding <i>Project Browser</i> tab. |
| Apply      | Process data through this node                                        |

---

**Note:** The `DF_Name` options do not update live with the removal or creation of tabs in the *Project Browser*, you must create a new node to reflect these types of changes.

---

## Save

### Source

Save the input Transmission to a file so that the Transmission can be used re-loaded in the Flowchart for later use.

**Usage:** Connect an input Transmission to this node's **In** terminal, click the button to choose a path to save a new file to, and then click the Apply checkbox to save the input Transmission to the chosen file.

| Terminal | Description                      |
|----------|----------------------------------|
| In       | Transmission to be saved to file |

| Parameters | Description                                              |
|------------|----------------------------------------------------------|
| saveBtn    | Button to choose a filepath to save the Transmission to. |
| Apply      | Process data through this node                           |

---

**Note:** You must always save a Transmission to a new file (pandas with hdf5 exhibits weird behavior if you overwrite, this is the easiest workaround). If you try to overwrite the file you will be presented with an error saying that the file already exists.

---

## Merge

### Source

Merge multiple Transmissions into a single Transmission. The DataFrames of the individual Transmissions are concatenated using `pandas.concat` and History Traces are also merged. The History Trace of each individual input Transmission is kept separately.

**Warning:** At the moment, if you create two separate data streams that originate from the same Transmission and then merge them at a later point, the analysis log (History Trace) of the individual data streams are not maintained. See the information about data blocks in the *Transmission*.

| Terminal | Description                |
|----------|----------------------------|
| In       | Transmissions to be merged |
| Out      | Merged Transmission        |

## ViewTransmission

### Source

View the input Transmission object using the spyder Object Editor. For example you can explore the Transmission DataFrame and HistoryTrace.

## ViewHistory

### Source

View the HistoryTrace of the input Transmission in a nice Tree View GUI.

## TextFilter

### Source

Include or Exclude Transmission DataFrame rows according to a text filter in a categorical column.

**Usage Example:** If you want to select all traces that are from photoreceptor cells and you have a categorical column, named `cell_types` for example, containing cell type labels, choose “`cell_type`” as the *Column* parameter and enter “`photoreceptor`” as the *filter* parameter, and select *Include*. If you want to select everything that are not photoreceptors select *Exclude*.

---

**Note:** It is recommended to filter and group your data beforehand using the *Project Browser* since it allows much more sophisticated filtering.

---

| Terminal | Description                                             |
|----------|---------------------------------------------------------|
| In       | Input Transmission                                      |
| Out      | Transmission its DataFrame filtered accoring parameters |

| Parameters | Description                                               |
|------------|-----------------------------------------------------------|
| Column     | Categorical column that contains the text filter to apply |
| filter     | Text filter to apply                                      |
| Include    | Include all rows matching the text filter                 |
| Exclude    | Exclude all rows matching the text filter                 |
| Apply      | Process data through this node                            |

**HistoryTrace output structure:** Dict of all the parameters for this node

## SpliceArrays

### Source

Splice arrays derived in the specified numerical data column and place the spliced output arrays in the output column.

**Output Data Column** (*numerical*): `_SPLICE_ARRAYS`

| Terminal | Description                                                                            |
|----------|----------------------------------------------------------------------------------------|
| In       | Input Transmission                                                                     |
| Out      | Transmission with arrays from the input column spliced and placed in the output column |

| Parameters               | Description                                               |
|--------------------------|-----------------------------------------------------------|
| <code>data_column</code> | Numerical data column containing the arrays to be spliced |
| <code>indices</code>     | The splice indices, “start_index:end_index”               |
| Apply                    | Process data through this node                            |

## DropNa

### Source

Drop NaNs and Nones (null) from the Transmission DataFrame. Uses `DataFrame.dropna` and `DataFrame.isna` methods.

- If you choose “row” or “column” as axis, entire rows or columns will be dropped if any or all (see params) of the values are NaN/None.
- If you choose to drop NaNs/Nones according to a specific column, it will drop the entire row if that row has a NaN/None value for the chosen column.

| Terminal | Description                                                  |
|----------|--------------------------------------------------------------|
| In       | Input Transmission                                           |
| Out      | Transmission NaNs and None’s removed according to the params |

| Parameters        | Description                                                                                                                                                                                                 |
|-------------------|-------------------------------------------------------------------------------------------------------------------------------------------------------------------------------------------------------------|
| <code>axis</code> | Choose to rows, columns, or a rows according to a specific column.                                                                                                                                          |
| <code>how</code>  | <p><i>any</i>: Drop if any value in the row/column is NaN/None</p> <p><i>all</i>: Drop only if all values in the row/column are Nan/None</p> <p>ignored if “axis” parameter is set to a specific column</p> |
| Apply             | Process data through this node                                                                                                                                                                              |

## NormRaw

### Source

Scale the raw data such that the min and max values are set to the min and max values derived from the raw spatial regions of the image sequences they originate from. Only for CNMFE data.

The arrays in the `_RAW_CURVE` column are scaled and the output is placed in a new column named `_NORMRAW`

| Terminal | Description                                              |
|----------|----------------------------------------------------------|
| In       | Input Transmission                                       |
| Out      | Transmission with the result placed in the output column |

| Parameter | Description                                                                                                                                                                                                                                                                                                                                                   |
|-----------|---------------------------------------------------------------------------------------------------------------------------------------------------------------------------------------------------------------------------------------------------------------------------------------------------------------------------------------------------------------|
| option    | Derive the raw min & max values from one of the following options:<br><i>top_5</i> : Top 5 brightest pixels<br><i>top_10</i> : Top 10 brightest pixels<br><i>top_5p</i> : Top 5% of brightest pixels<br><i>top_10p</i> : Top 10% of brightest pixels<br><i>top_25p</i> : Top 25% of brightest pixels<br><i>full_mean</i> : Full mean of the min and max array |
| Apply     | Process data through this node                                                                                                                                                                                                                                                                                                                                |

---

**Note:** If the raw min value is higher than the raw max value the curve will be excluded in the output. You will be presented with a warning box with the number of curves that were excluded due to this.

---

## 1.24.2 Display

### These nodes connect input Transmission(s) to various plots for visualization

The actual Plot Widget instance that these nodes use can be accessed through the `plot_widget` attribute in the flowchart console.

For example

```
# Get a heatmap node that is named "Heatmap.0"
>>> hn = get_nodes()['Heatmap.0']

# the plot widget instance
>>> hn.plot_widget

<mesmerize.plotting.widgets.heatmap.widget.HeatmapTracerWidget object at 0x7f26e5d29678>
```



## BeeswarmPlots

### Source

Based on pqytgraph Beeswarm plots.

Visualize data points as a pseudoscatter and as corresponding Violin Plots. This is commonly used to visualize peak features and compare different experimental groups.

For information on the plot widget see *Beeswarm Plots*

| Terminal | Description                                                                                                 |
|----------|-------------------------------------------------------------------------------------------------------------|
| In       | Input Transmission<br><br>The DataFrame column(s) of interest must have single numerical values, not arrays |

## Heatmap

### Source

Used for visualizing numerical arrays in the form of a heatmap. Also used for visualizing a hierarchical clustering tree (dendrogram) along with a heatmap with row order corresponding to the order leaves of the dendrogram.

For information on the plot widget see *Heat Plot*

| Terminal | Description                                                                                                   |
|----------|---------------------------------------------------------------------------------------------------------------|
| In       | Input Transmission<br><br>The arrays in the DataFrame column(s) of interest <b>must</b> be of the same length |

---

**Note:** Arrays in the DataFrame column(s) of interest **must** be of the same length. If they are not, you must splice them using the *SpliceArrays* node.

---

## CrossCorr

### Source

Perform Cross-Correlation analysis. For information on the plot widget see *CrossCorrelation Plot*

## Plot

### Source

For information on the plot widget see *Simple Plot*

A simple plot.

| Terminal | Description        |
|----------|--------------------|
| In       | Input Transmission |

| Parameters  | Description                                        |
|-------------|----------------------------------------------------|
| data_column | Data column to plot, must contain numerical arrays |
| Show        | Show/hide the plot window                          |
| Apply       | Process data through this node                     |

## Proportions

### Source

Plot stacked bar chart of one categorical variable vs. another categorical variable.

For information on the plot widget see *Proportions Plot*

## ScatterPlot

### Source

Create scatter plot of numerical data containing [X, Y] values

For information on the plot widget see *Scatter Plot*

## 1.24.3 Signal

### Routine signal processing functions

I recommend this book by Tom O'Haver if you are unfamiliar with basic signal processing: <https://terpconnect.umd.edu/~toh/spectrum/TOC.html>

### Butterworth

#### Source

Creates a Butterworth filter using `scipy.signal.butter` and applies it using `scipy.signal.filtfilt`.

The `Wn` parameter of `scipy.signal.butter` is calculated by dividing the sampling rate of the data by the `freq_divisor` parameter (see below).

**Output Data Column** (*numerical*): `_BUTTERWORTH`

| Terminal | Description                                                  |
|----------|--------------------------------------------------------------|
| In       | Input Transmission                                           |
| Out      | Transmission with filtered signals in the output data column |

| Parameters   | Description                                                          |
|--------------|----------------------------------------------------------------------|
| data_column  | Data column containing numerical arrays to be filtered               |
| order        | Order of the filter                                                  |
| freq_divisor | Divisor for dividing the sampling frequency of the data to get $W_n$ |
| Apply        | Process data through this node                                       |

## SavitzkyGolay

### Source

Savitzky Golay filter. Uses `scipy.signal.savgol_filter`.

**Output Data Column** (*numerical*): `_SAVITZKY_GOLAY`

| Terminal | Description                                                  |
|----------|--------------------------------------------------------------|
| In       | Input Transmission                                           |
| Out      | Transmission with filtered signals in the output data column |

| Parameters         | Description                                                                                |
|--------------------|--------------------------------------------------------------------------------------------|
| data_column        | Data column containing numerical arrays to be filtered                                     |
| win-<br>dow_length | Size of windows for fitting the polynomials. Must be an odd number.                        |
| polyorder          | Order of polynomials to fit into the windows. Must be less than <i>win-<br/>dow_length</i> |
| Apply              | Process data through this node                                                             |

## PowSpecDens

### Resample

#### Source

Resample the data in numerical arrays. Uses `scipy.signal.resample`.

**Output Data Column** (*numerical*): `_RESAMPLE`

| Terminal | Description                                                   |
|----------|---------------------------------------------------------------|
| In       | Input Transmission                                            |
| Out      | Transmission with resampled signals in the output data column |

| Parameters  | Description                                             |
|-------------|---------------------------------------------------------|
| data_column | Data column containing numerical arrays to be resampled |
| Rs          | New sampling rate in $T_u$ units of time.               |
| Tu          | Time unit                                               |
| Apply       | Process data through this node                          |

---

**Note:** If  $T_u = 1$ , then  $R_s$  is the new sampling rate in Hertz.

---

## ScalerMeanVariance

### Source

Uses `tslearn.preprocessing.TimeSeriesScalerMeanVariance`

**Output Data Column** (*numerical*): `_SCALER_MEAN_VARIANCE`

| Terminal | Description                                           |
|----------|-------------------------------------------------------|
| In       | Input Transmission                                    |
| Out      | Transmission with scaled signals in the output column |

| Parameters               | Description                                          |
|--------------------------|------------------------------------------------------|
| <code>data_column</code> | Data column containing numerical arrays to be scaled |
| <code>mu</code>          | Mean of the output time series                       |
| <code>std</code>         | Standard Deviation of the output time series         |
| Apply                    | Process data through this node                       |

---

**Note:** if  $\mu = 0$  and  $\text{std} = 1$ , the output is the z-score of the signal.

---

## Normalize

### Source

Normalize the signal so that all values are between 0 and 1 based on the min and max of the signal.

**Output Data Column** (*numerical*): `_NORMALIZE`

| Terminal | Description                                           |
|----------|-------------------------------------------------------|
| In       | Input Transmission                                    |
| Out      | Transmission with scaled signals in the output column |

| Parameters               | Description                                          |
|--------------------------|------------------------------------------------------|
| <code>data_column</code> | Data column containing numerical arrays to be scaled |
| Apply                    | Process data through this node                       |

## RFFT

### Source

Uses `scipy.fftpack.rfft`. “Discrete Fourier transform of a real sequence”

**Output Data Column** (*numerical*): `_RFFT`

| Terminal | Description                                               |
|----------|-----------------------------------------------------------|
| In       | Input Transmission                                        |
| Out      | Transmission with the RFT of signals in the output column |

| Parameters  | Description                             |
|-------------|-----------------------------------------|
| data_column | Data column containing numerical arrays |
| Apply       | Process data through this node          |

## iRFFT

### Source

Uses `scipy.fftpack.irfft`. “inverse discrete Fourier transform of real sequence x”

**Output Data Column** (*numerical*): `_IRFFT`

## PeakDetect

### Source

Simple Peak Detection using derivatives. The “Differentiation” chapter of Tom O’Haver’s book has a section on Peak Detection which I recommend reading. <https://terpconnect.umd.edu/~toh/spectrum/TOC.html>

**Output Data Column** (*DataFrame*): `peaks_bases`

### See also:

*Peak Editor GUI*

| Terminal                     | Description                                                                                                                                                   |
|------------------------------|---------------------------------------------------------------------------------------------------------------------------------------------------------------|
| Derivative                   | Transmission with derivatives of signals. Must have <b>_DERIVATIVE</b> column.<br><br>It’s recommended to use a derivative from a normalized filtered signal. |
| Normalized                   | Transmission containing Normalized signals, used for thresholding<br><br>See <i>Normalize</i> node                                                            |
| Curve                        | Transmission containing original signals.<br><br>Usually not filtered to avoid distortions caused by filtering                                                |
| PB_Input ( <i>optional</i> ) | Transmission containing peaks & bases data ( <code>peaks_bases</code> column).<br><br>Useful for visualizing a saved Transmission that has peaks & bases data |
| Out                          | Transmission with the detected peaks & bases as DataFrames in the output column                                                                               |

**Warning:** The *PB\_Input* terminal overrides all other terminals. Do not connect inputs to *PB\_Input* and other terminals simultaneously.

| Parameter       | Description                                                                       |
|-----------------|-----------------------------------------------------------------------------------|
| data_column     | Data column of the input <i>Curve</i> Transmission for placing peaks & bases onto |
| Fictional_Bases | Add bases to beginning and end of signal if first or last peak is lonely          |
| Edit            | Open Peak Editor GUI, see <i>Peak Editor</i>                                      |
| SlopeThr        | Slope threshold                                                                   |
| AmplThrAbs      | Absolute amplitude threshold                                                      |
| AmplThrRel      | Relative amplitude threshold                                                      |
| Apply           | Process data through this node                                                    |

## PeakFeatures

### Source

Compute peak features. The DataFrame of the output Transmission contains one row for each peak.

| Output Data Column    | Description                                                                                                                                        |
|-----------------------|----------------------------------------------------------------------------------------------------------------------------------------------------|
| _pf_peak_curve        | array representing the peak                                                                                                                        |
| _pf_ampl_rel_b_ix_l   | peak amplitude relative to its left base                                                                                                           |
| _pf_ampl_rel_b_ix_r   | peak amplitude relative to its right base                                                                                                          |
| _pf_ampl_rel_b_mean   | peak amplitude relative to the mean of its bases                                                                                                   |
| _pf_ampl_rel_zero     | peak amplitude relative to zero                                                                                                                    |
| _pf_area_rel_zero     | Simpson's Rule Integral of the curve                                                                                                               |
| _pf_area_rel_min      | Simpson's Rule Integral relative to the minimum value of the curve<br>Subtracts the minimum values of the peak curve before computing the integral |
| _pf_rising_slope_avg  | slope of the line drawn from the left base to the peak                                                                                             |
| _pf_falling_slope_avg | slope of the line drawn from the right base to the peak                                                                                            |
| _pf_duration_base     | distance between the left and right base                                                                                                           |
| _pf_p_ix              | index of the peak maxima in the parent curve                                                                                                       |
| _pf_uuid              | peak <b>UUID</b>                                                                                                                                   |
| _pf_b_ix_l            | index of the left base in the parent curve                                                                                                         |
| _pf_b_ix_r            | index of the right base in the parent curve                                                                                                        |

### See also:

`mesmerize/analysis/compute_peak_features` for the code that computes the peak features.

| Terminal | Description                                                                                           |
|----------|-------------------------------------------------------------------------------------------------------|
| In       | Input Transmission. Must contain <i>peak_bases</i> column that contains <i>peak_bases</i> DataFrames. |
| Out      | Transmission with peak features in various output columns                                             |

| Parameter          | Description                                                                  |
|--------------------|------------------------------------------------------------------------------|
| <i>data_column</i> | Data column containing numerical arrays from which to compute peak features. |
| Apply              | Process data through this node                                               |

**Warning:** If there are issues with a particular peak a user warning will be displayed in the terminal that Mesmerize is running and the peak will be ignored. This happens when a peak is 1) not flanked by bases on both sides, 2) a peak or base is out of bounds for the parent curve from the chosen *data\_column* or 3) other index issues w.r.t. the peak. In the terminal, the number after the progress bar will show the index of the parent curve, for example here the parent curve is 319: 41%| | 319/771. The index of the offending peak within the parent curve will be printed below the progress bar along with a statement that may specify the issue with the peak.

---

## 1.24.4 Math

### Nodes for performing basic Math functions

#### Derivative

##### Source

Computes the first derivative.

**Output Data Column** (*numerical*): `_DERIVATIVE`

| Terminal | Description                                                  |
|----------|--------------------------------------------------------------|
| In       | Input Transmission                                           |
| Out      | Transmission with the derivative placed in the output column |

| Parameter          | Description                             |
|--------------------|-----------------------------------------|
| <i>data_column</i> | Data column containing numerical arrays |
| Apply              | Process data through this node          |

## TVDiff

### Source

Based on [Numerical Differentiation of Noisy, Nonsmooth Data](#). Rick Chartrand. (2011).  
Translated to Python by Simone Sturniolo.

## XpowerY

### Source

Raises each element of the numerical arrays in the data\_column to the exponent Y

**Output Data Column** (*numerical*): `_X_POWER_Y`

| Terminal | Description                                              |
|----------|----------------------------------------------------------|
| In       | Input Transmission                                       |
| Out      | Transmission with the result placed in the output column |

| Parameter   | Description                             |
|-------------|-----------------------------------------|
| data_column | Data column containing numerical arrays |
| Y           | Exponent                                |
| Apply       | Process data through this node          |

## AbsoluteValue

### Source

Element-wise absolute values of the input arrays. Computes root mean squares if input arrays are complex.

**Output Data Column** (*numerical*): `_ABSOLUTE_VALUE`

| Terminal | Description                                              |
|----------|----------------------------------------------------------|
| In       | Input Transmission                                       |
| Out      | Transmission with the result placed in the output column |

| Parameter   | Description                             |
|-------------|-----------------------------------------|
| data_column | Data column containing numerical arrays |
| Apply       | Process data through this node          |

## LogTransform

### Source

Perform Logarithmic transformation of the data.

**Output Data Column** (*numerical*): `_LOG_TRANSFORM`

| Terminal | Description                                              |
|----------|----------------------------------------------------------|
| In       | Input Transmission                                       |
| Out      | Transmission with the result placed in the output column |



| Parameter   | Description                                                                                                                                                      |
|-------------|------------------------------------------------------------------------------------------------------------------------------------------------------------------|
| data_column | Data column containing numerical arrays                                                                                                                          |
| transform   | <i>log10</i> : Base 10 logarithm<br><i>ln</i> : Natural logarithm<br><i>modlog10</i> : $sign(x) * \log_{10}( x  + 1)$<br><i>modln</i> : $sign(x) * \ln( x  + 1)$ |
| Apply       | Process data through this node                                                                                                                                   |

## ArrayStats

### Source

Perform a few basic statistical functions.

**Output Data Column** (*numerical*): Customizable by user entry

Output data are single numbers, not arrays

| Terminal | Description                                              |
|----------|----------------------------------------------------------|
| In       | Input Transmission                                       |
| Out      | Transmission with the result placed in the output column |

The desired function is applied to each 1D array in the *data\_column* and the output is placed in the Output Data Column.

| Parameter                        | Description                                                                                                                                                                                                                                                                                                                                                                                                                                                                                                                                                                                                                                                                                                                                                                                                                                                                                                            |
|----------------------------------|------------------------------------------------------------------------------------------------------------------------------------------------------------------------------------------------------------------------------------------------------------------------------------------------------------------------------------------------------------------------------------------------------------------------------------------------------------------------------------------------------------------------------------------------------------------------------------------------------------------------------------------------------------------------------------------------------------------------------------------------------------------------------------------------------------------------------------------------------------------------------------------------------------------------|
| data_column                      | Data column containing numerical arrays                                                                                                                                                                                                                                                                                                                                                                                                                                                                                                                                                                                                                                                                                                                                                                                                                                                                                |
| function                         | <p><i>amin</i>: Return the minimum of the input array</p> <p><i>amax</i>: Return the maximum of the input array</p> <p><i>nanmin</i>: Return the minimum of the input array, ignore NaNs</p> <p><i>nanmax</i>: Return the maximum of the input array, ignore NaNs</p> <p><i>ptp</i>: Return the range (max - min) of the values of the input array</p> <p><i>median</i>: Return the median of the input array</p> <p><i>mean</i>: Return the mean of the input array</p> <p><i>std</i>: Return the standard deviation of the input array</p> <p><i>var</i>: Return the variance of the input array</p> <p><i>nanmedian</i>: Return the median of the input array, ignore NaNs</p> <p><i>nanmean</i>: Return the mean of the input array, ignore NaNs</p> <p><i>nanstd</i>: Return the standard deviation of the input array, ignore NaNs</p> <p><i>nanvar</i>: Return the variance of the input array, ignore NaNs</p> |
| group_by ( <i>Optional</i> )     | Group by a categorical variable, for example get the mean array of a group                                                                                                                                                                                                                                                                                                                                                                                                                                                                                                                                                                                                                                                                                                                                                                                                                                             |
| group_by_sec ( <i>Optional</i> ) | Group by a secondary categorical variable                                                                                                                                                                                                                                                                                                                                                                                                                                                                                                                                                                                                                                                                                                                                                                                                                                                                              |
| output_col                       | Enter a name for the output column                                                                                                                                                                                                                                                                                                                                                                                                                                                                                                                                                                                                                                                                                                                                                                                                                                                                                     |
| Apply                            | Process data through this node                                                                                                                                                                                                                                                                                                                                                                                                                                                                                                                                                                                                                                                                                                                                                                                                                                                                                         |

## ArgGroupStat

### Source

Group by a categorical variable and return the value of any other column based on a statistic. Basically creates sub-dataframes for each group and then returns based on the sub-dataframe.

Group by column “group\_by” and return value from column “return\_col” where data in *data\_column* fits “stat”

**Output Data Column** (*Any*): ARG\_STAT

| Terminal | Description                                              |
|----------|----------------------------------------------------------|
| In       | Input Transmission                                       |
| Out      | Transmission with the result placed in the output column |

| Parameter   | Description                                                |
|-------------|------------------------------------------------------------|
| data_column | Data column containing single numbers (not arrays for now) |
| group_by    | Group by column (categorical variables)                    |
| return_col  | Return value from this column (any data)                   |
| stat        | “max” or “min”                                             |
| Apply       | Process data through this node                             |

## ZScore

### Source

Compute Z-Scores of the data. Uses `scipy.stats.zscore`. The input data are divided into groups according to the `group_by` parameter. Z-Scores are computed for the data in each group with respect to the data only in that group.

**Output Data Column (numerical):** `_ZSCORE`

| Terminal | Description                                              |
|----------|----------------------------------------------------------|
| In       | Input Transmission                                       |
| Out      | Transmission with the result placed in the output column |

| Parameter   | Description                                   |
|-------------|-----------------------------------------------|
| data_column | Input data column containing numerical arrays |
| group_by    | Categorical data column to group by.          |
| Apply       | Process data through this node                |

## LinRegress

### Source

Basically uses `scipy.stats.linregress`

Performs Linear Regression on numerical arrays and returns slope, intercept, r-value, p-value and standard error

| Terminal | Description                                              |
|----------|----------------------------------------------------------|
| In       | Input Transmission                                       |
| Out      | Transmission with the result placed in the output column |

| Parameter   | Description                                                                                                                    |
|-------------|--------------------------------------------------------------------------------------------------------------------------------|
| data_column | Data column containing 1D numerical arrays. The values are used as the y values and indices as the x values for the regression |

**Output Columns:** Single numbers, `_SLOPE`, `_INTERCEPT`, `_R-VALUE`, `_P-VALUE`, `_STDERR` as described in `scipy.stats.linregress`

---

## 1.24.5 Biology

Nodes for some biologically useful things which I couldn't categorize elsewhere

### ExtractStim

#### Source

Extract the portions of a trace corresponding to stimuli that have been temporally mapped onto it. It outputs one row per stimulus period.

**Note:** Stimulus extraction is currently quite slow, will be optimized after some planned changes in the Transmission object.

| Output Data Column | Description                                              |
|--------------------|----------------------------------------------------------|
| ST_TYPE            | Stimulus type, corresponds to your <i>Project Config</i> |
| ST_NAME            | Name of the stimulus                                     |
| _ST_CURVE          | The extracted array based on the parameters              |
| _ST_START_IX       | Start index of the stimulus period in the parent curve   |
| _ST_END_IX         | End index of the stimulus period in the parent curve     |
| ST_uuid            | UUID assigned for the extracted stimulus period          |

| Parameter    | Description                                                                                                                                                                                                                                                                                                                                                                                               |
|--------------|-----------------------------------------------------------------------------------------------------------------------------------------------------------------------------------------------------------------------------------------------------------------------------------------------------------------------------------------------------------------------------------------------------------|
| data_column  | Data column containing the signals to be extracted based on the stimulus maps                                                                                                                                                                                                                                                                                                                             |
| Stim_Type    | Type of stimulus to extract                                                                                                                                                                                                                                                                                                                                                                               |
| start_offset | Offset the start index of the stimulus mapping by a value (in frames)                                                                                                                                                                                                                                                                                                                                     |
| end_offset   | Offset the end index of the stimulus mapping by a value (in frames)                                                                                                                                                                                                                                                                                                                                       |
| zero_pos     | Zero index of the extracted signal<br><br><i>start_offset</i> : extraction begins at the <i>start_offset</i> value, stops at the <i>end_offset</i><br><br><i>stim_end</i> : extraction begins at the end of the stimulus, stops at the <i>end_offset</i> .<br><br><i>stim_center</i> : extraction begins at the midpoint of the stimulus period plus the <i>start_offset</i> , stops at <i>end_offset</i> |

## DetrendDFoF

### Source

Uses the `detrend_df_f` function from the CaImAn library. This node does not use any of the numerical data in a Transmission DataFrame to compute the detrended  $\Delta F/F_0$ . It directly uses the CNMF output data for the Samples that are present in the Transmission DataFrame.

**Output Data Column** (*numerical*): `_DETREND_DF_O_F`

## StaticDFoFo

### Source

Perform  $\frac{F-F_0}{F_0}$  without a rolling window.  $F$  is an input array and  $F_0$  is the minimum value of the input array.

**Output Data Column** (*numerical*): `_STATIC_DF_O_F`

| Terminal | Description                                              |
|----------|----------------------------------------------------------|
| In       | Input Transmission                                       |
| Out      | Transmission with the result placed in the output column |

| Parameter                | Description                             |
|--------------------------|-----------------------------------------|
| <code>data_column</code> | Data column containing numerical arrays |
| Apply                    | Process data through this node          |

## StimTuning

### Source

Stimulus Tuning analysis. For more information see *Stimulus Tuning Plot*

---

## 1.24.6 Clustering

### KShape

#### Source

Perform KShape clustering. For more information see *KShape plot*.

### KMeans

#### Source

Basically `sklearn.cluster.KMeans`.

---

## 1.24.7 Hierarchical

These nodes allow you to perform Hierarchical Clustering using `scipy.cluster.hierarchy`.

If you are unfamiliar with Hierarchical Clustering I recommend going through this chapter from Michael Greenacre: <http://www.econ.upf.edu/~michael/stanford/maeb7.pdf>

---

**Note:** Some of these nodes do not use Transmission objects for some inputs/outputs.

---

### Linkage

#### Source

Compute a linkage matrix which can be used to form flat clusters using the *FCluster* node.

Based on `scipy.cluster.hierarchy.linkage`

| Terminal | Description                                                                         |
|----------|-------------------------------------------------------------------------------------|
| In       | Input Transmission                                                                  |
| Out      | dict containing the Linkage matrix and parameters, <b>not a Transmission object</b> |

| Parameters                 | Description                                                                                                               |
|----------------------------|---------------------------------------------------------------------------------------------------------------------------|
| <code>data_column</code>   | Numerical data column used for computing linkage matrix                                                                   |
| <code>method</code>        | linkage method                                                                                                            |
| <code>metric</code>        | metric for computing distance matrix                                                                                      |
| <code>optimal_order</code> | minimize distance between successive leaves, more intuitive visualization<br><br><a href="#">Click here for more info</a> |
| Apply                      | Process data through this node                                                                                            |

### FCluster

#### Source

“Form flat clusters from the hierarchical clustering defined by the given linkage matrix.”

Based on `scipy.cluster.hierarchy.fcluster`

**Output Data Column** (*categorical*): FCLUSTER\_LABELS

| Terminal                     | Description                                                                               |
|------------------------------|-------------------------------------------------------------------------------------------|
| Linkage                      | Linkage matrix, output from <i>Linkage</i> node.                                          |
| Data                         | Input Transmission, usually the same input Transmission used for the <i>Linkage</i> node. |
| IncM ( <i>optional</i> )     | Inconsistency matrix, output from <i>Inconsistent</i>                                     |
| Monocrit ( <i>optional</i> ) | Output from <i>MaxIncStat</i> or <i>MaxInconsistent</i>                                   |
| Out                          | Transmission with clustering data that can be visualized using the <i>Heatmap</i>         |

**Parameters:** Exactly as described in `scipy.cluster.hierarchy.fcluster`

**HistoryTrace output structure:** Dict of all the parameters for this node, as well as the parameters used for creating the linkage matrix and the linkage matrix itself from the *Linkage node*.

### Inconsistent

### MaxIncStat

### MaxInconsistent

---

## 1.24.8 Transform

Nodes for transforming data

### LDA

*Source*

Perform Linear Discriminant Analysis. Uses `sklearn.discriminant_analysis.LinearDiscriminantAnalysis`

| Terminal   | Description                                                                                                                                                                                                                                                                                                            |
|------------|------------------------------------------------------------------------------------------------------------------------------------------------------------------------------------------------------------------------------------------------------------------------------------------------------------------------|
| train_data | Input Transmission containing the training data                                                                                                                                                                                                                                                                        |
| predict    | Input Transmission containing data on which to predict                                                                                                                                                                                                                                                                 |
| T          | <p>Transmission with Transformed data and decision function. Output columns outlined below:</p> <p><b>_LDA_TRANSFORM:</b> The transformed data, can be visualized with a <i>Scatter Plot</i> for instance</p> <p><b>_LDA_DFUNC:</b> Decision function (confidence scores). Can be visualized with a <i>Heatmap</i></p> |
| coef       | <p>Transmission with LDA Coefficients. Output columns outlined below:</p> <p><b>classes:</b> The categorical labels that were trained against</p> <p><b>_COEF:</b> LDA Coefficients (weight vectors) for the classes. Can be visualized with a <i>Heatmap</i></p>                                                      |
| means      | <p>Transmission with LDA Means. Output columns outlined below:</p> <p><b>classes:</b> The categorical labels that were trained against</p> <p><b>_MEANS:</b> LDA means for the classes. Can be visualized with a <i>Heatmap</i></p>                                                                                    |
| predicted  | <p>Transmission containing predicted class labels for the data.</p> <p>The class labels are placed in a column named <b>LDA_PREDICTED_LABELS</b></p> <p>The names of the class labels correspond to the labels from the training labels</p> <p><i>optional</i></p>                                                     |



| Parameter     | Description                                                                                                                                                                         |
|---------------|-------------------------------------------------------------------------------------------------------------------------------------------------------------------------------------|
| train_data    | Single or multiple data columns that contain the input features.                                                                                                                    |
| labels        | Data column containing categorical labels to train to                                                                                                                               |
| solver        | <i>svd</i> : Singular Value Decomposition<br><i>lsqr</i> : Least Squares solution<br><i>eigen</i> : Eigen decomposition                                                             |
| shrinkage     | Can be used with <i>lsqr</i> or <i>eigen</i> solvers.                                                                                                                               |
| shrinkage_val | shrinkage value if <i>shrinkage</i> is set to "value"                                                                                                                               |
| n_components  | Number of components to output                                                                                                                                                      |
| tol           | Tolerance threshold exponent. The used value is $10^{<tol>}$                                                                                                                        |
| score         | Displays mean score of the classification (read only)                                                                                                                               |
| predict_on    | Single or multiple data columns that contain the data that are used for predicting on<br>Usually the same name as the data column(s) used for the training data.<br><i>optional</i> |

**HistoryTrace output structure:** Dict of all the parameters for this node

## 1.25 Examples

### 1.25.1 Datasets

You can view examples of flowcharts in the demo dataset or one of the other datasets associated with the paper:

Demo dataset: <https://doi.org/10.6084/m9.figshare.11370183>

C. intestinalis dataset: <https://doi.org/10.6084/m9.figshare.10289162>

C. elegans dataset: <https://doi.org/10.6084/m9.figshare.10287113>

PVC-7 as a Mesmerize dataset: <https://doi.org/10.6084/m9.figshare.10293041>

## 1.25.2 Video Tutorials

## 1.25.3 Screenshots

Flowchart screenshots from the *C. intestinalis* dataset.

### Z-score

The screenshot displays a flowchart titled "Flowchart - 2" with six sequential widgets: Load\_Proj\_DF.0, NormRaw.0, SpliceArrays.0, StaticDFoFo.0, ZScore.0, and Heatmap.0. Each widget has an "Out" port on the left and an "In" port on the right, connected by a blue line. The NormRaw.0 widget is currently selected, and its configuration is shown in the "Control Widgets" panel on the right.

The Control Widgets panel for "zscore\_all\_tagged.fc" shows the following settings for the selected NormRaw.0 widget:

- option: top\_5
- Apply:

The "Selected Nodes" table at the bottom left is empty:

| key / index | type     | value |
|-------------|----------|-------|
|             | NoneType | None  |

## Peak detection

The screenshot displays the Mesmerize software interface for a peak detection workflow. The main window is titled "Flowchart - 3" and shows a sequence of processing steps: Load\_Proj\_DF.0, NormRaw.0, SpliceArrays.0, StaticDFoFo.0, ZScore.0, ButterWorth.0, Normalize.0, Derivative.0, and PeakDetect.0. The PeakDetect.0 node is currently selected, and its control widgets are visible on the right side of the interface.

The control widgets for the selected **PeakDetect.0** node include:

- DF\_Name:** all\_tagged
- Update:** Update
- Apply:**
- PinDF:**
- NormRaw.0:** option\_top\_5 (dropdown), Apply
- SpliceArrays.0:** Apply ; data\_column: \_NORMRAW; indices: 0:2990
- StaticDFoFo.0:** data\_column: \_SPLICE\_ARRAYS; Apply
- ZScore.0:** data\_column: \_STATIC\_DF\_O\_F; group\_by: SampleID; Apply
- ButterWorth.0:** data\_column: \_ZSCORE; order: 2; freq\_divisor: 5.00; Apply
- Normalize.0:** data\_column: \_BUTTERWORTH; Apply
- Derivative.0:** data\_column: \_NORMALIZE; Apply
- PeakDetect.0:** data\_column: \_NORMRAW; Fictional\_Bases: ; Edit: Open GUI; SlopeThr: 0.00; AmpThrAbs: 0.25; AmpThrRel: 0.00; Apply

At the bottom of the interface, there is a "Selected Node" table:

| key / index | type     | value |
|-------------|----------|-------|
|             | NoneType | None  |

## Hierarchical clustering

The screenshot displays a Mesmerize flowchart titled "Flowchart - 1" with a black background. The flowchart contains the following nodes in sequence: Load\_Proj\_DF.0, SpliceArrays.0, Normalize.0, RFFT.0, AbsoluteValue.0, LogTransform.0, SpliceArrays.1, Linkage.0, and FCluster.0. The FCluster.0 node is highlighted with a red border. To the right of the flowchart is a "Control Widgets" panel for the function "hierarchical\_clustering\_freq\_domain.fc". This panel includes a "Load\_Proj\_DF.0" widget with settings for DF\_Name (all\_tagged), Update, Apply, and PinDF. Below it are two "SpliceArrays" widgets (SpliceArrays.0 and SpliceArrays.1) with settings for Apply, data\_column, and indices. Next are "Normalize.0", "RFFT.0", "AbsoluteValue.0", and "LogTransform.0" widgets, each with settings for data\_column, Apply, and transform. The "Linkage.0" widget has settings for data\_column, method (complete), metric (wasserstein), and optimal\_order. Finally, the "FCluster.0" widget has settings for threshold (10.00), criterion (maxclust), and depth (1). At the bottom of the control panel are "Reload Libs", "Flowchart", and "Reset view" buttons.

Below the flowchart, there is a "Hover info" section and a "Selected Node" table. The "Selected Node" table is currently empty, showing only the column headers.

| key / index | type     | value |
|-------------|----------|-------|
|             | NoneType | None  |

## 1.26 Beeswarm

Used for visualization of data points using a pseudo-scatter and violin plots.

### Layout

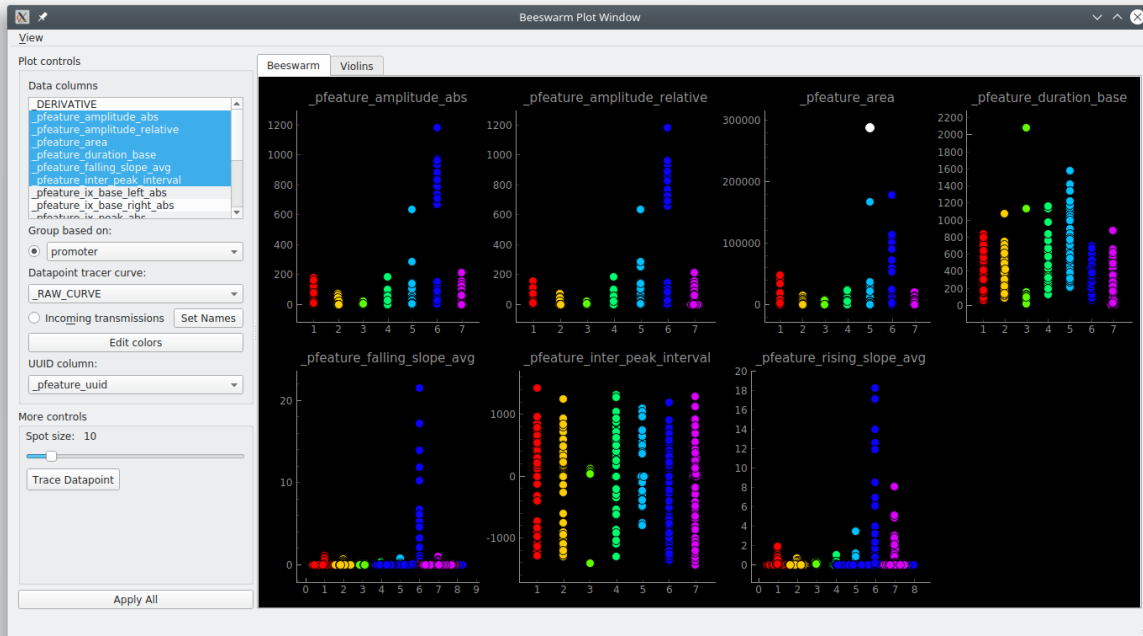

You can click on individual datapoints and view the associated data using the *Datapoint Tracer*. To show the Datapoint Tracer, in the menubar go to View -> Live datapoint tracer

### 1.26.1 Parameters

| Parameter              | Description                                                                                 |
|------------------------|---------------------------------------------------------------------------------------------|
| Data columns           | Multi-select data columns to plot<br><br>They must have single numerical values, not arrays |
| Group based on         | Categorical data column used for grouping the data                                          |
| Datapoint tracer curve | Data column, containing numerical arrays, that is shown in the <i>Datapoint Tracer</i>      |
| UUID column            | Column containing the UUIDs that correspond to the data in the selected data column(s)      |
| Apply all              | Apply the plot parameters and draw the plot                                                 |

## 1.27 Consoles

Currently the *Heatmap*, *Scatter*, *Proportions plot* and *KShape* follow a uniform structure allowing internal access to the data and plot axes. Refer to their *Base API*. For example, through their consoles you can access the *Transmission* containing data for the current plot, manually save the plot, etc.

## 1.28 Cross Correlation

Explore [Cross-correlation functions](#) of all curves from a sample. Normalized cross-correlations are computed using `tslearn.cycc.normalized_cc`

This is an interactive widget. You can click on the individual cells in the heatmap to view the individual curves, the cross-correlation function of the two curves, and the spatial localization of the ROI that they originate from.

### 1.28.1 Layout

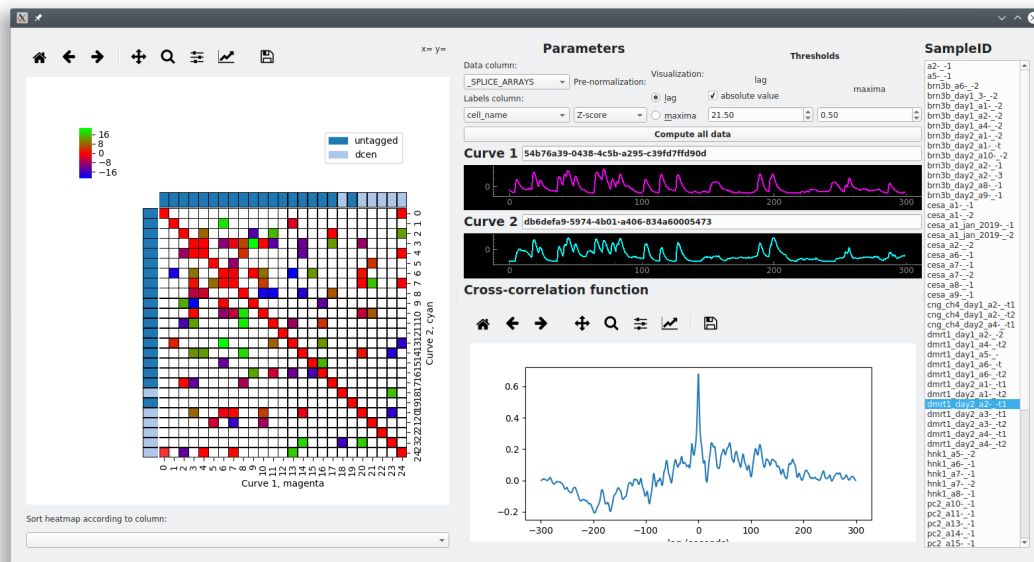

**Left:** Lag or Maxima Matrix (see below) with thresholds applied and visualized as a heatmap. When you click on the individual cells it will open/update the *Datapoint Tracer* according to the two curves the cell corresponds to.

**Top Center:** Parameters.

**Center:** When you click on a cell in the heatmap you will see Curve 1 (x-axis of heatmap), and Curve 2 (y-axis of heatmap) and their cross-correlation function. **The units are in seconds for all of these**

**Right:** List of Samples. Click on a Sample to select it as the current sample.

### 1.28.2 Lag Matrix

Computed as follows:

1. A 2D array is created where each element is a cross-correlation function (represented by a 1D numerical array).
2. The x-distance (time) between zero and the global maxima of the cross-correlation function (called *lag*) is computed for each of these elements.
3. The 2D array of cross-correlation functions is reduced to a 2D array of these *lag* values.

The result is a matrix where each element is the x-distance between zero and the global maxima of the cross-correlation of the two curves the element represents.

### 1.28.3 Maxima Matrix

Similar to computation of the Lag Matrix above, but instead of using the *lag* between zero and the global maxima it uses the y-value of the global maxima.

### 1.28.4 Parameters

**Data column:** The data column, containing *numerical* arrays, that are used as the input curves for computing cross-correlations.

**Labels column:** The labels column, containing *categorical* labels, that are used for the row and column labels in the heatmaps.

**Pre-normalization:** Option to perform 0 - 1 Normalization (Same method as the *Normalize*) or *Z-Score* of the input curves prior to computing their cross-correlation functions.

**Compute all data:** Apply the parameters and compute cross-correlation data for all Samples in the DataFrame of the input transmission.

### Thresholds

Apply thresholds for *lag* and the maxima value. The colormap limits of the heatmap are set according to this threshold and all data under are set to white on the heatmap (you can still click and explore them).

Thresholds are applied live onto the heatmap.

## 1.29 Datapoint Tracer

### *API Reference*

The Datapoint Tracer is attached to many plots, allowing you to interactively explore the data associated to the datapoints. You can explore the analysis history, the spatial localization of the ROI it originates from, associated numerical or categorical data, and view an additional numerical column (such as the raw trace).

The Datapoint Tracer is embedded in some plots, and in others you can open it by going to View -> Live Datapoint Tracer.

### 1.29.1 Video Tutorial

This tutorial shows how the Heatmap plot can be used along with the Datapoint Tracer during the latter half of this tutorial.

Part 5, 6 & 8 of the main tutorial series also show how the Datapoint Tracer can be used along with other types of plots: [https://www.youtube.com/playlist?list=PLgofWiw2s4REPxH8bx8wZo\\_6ca435OKqg](https://www.youtube.com/playlist?list=PLgofWiw2s4REPxH8bx8wZo_6ca435OKqg)

## 1.29.2 Layout

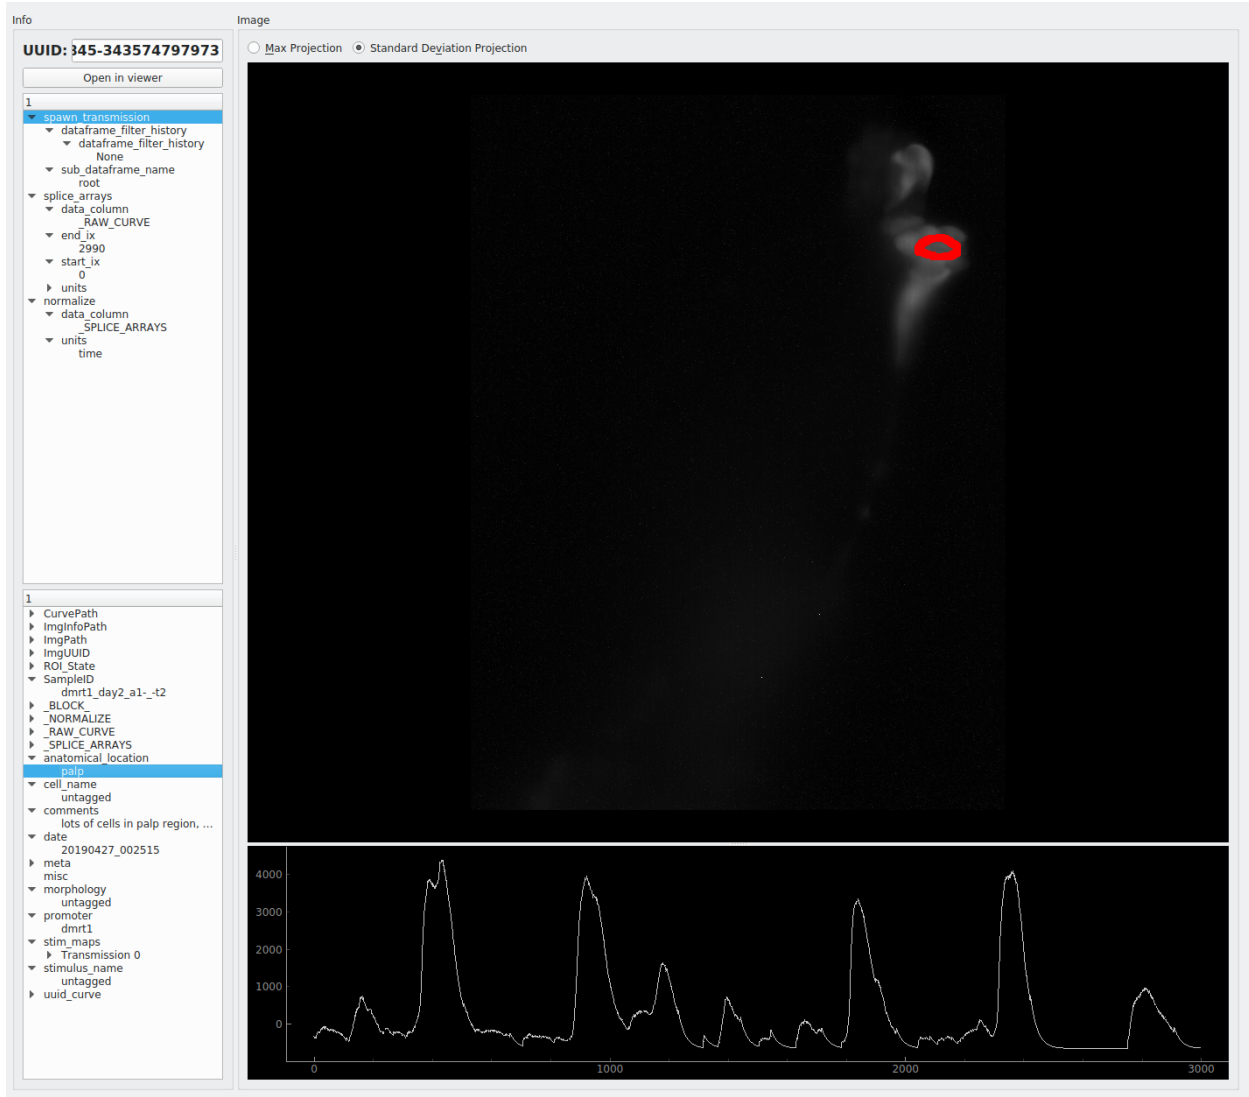

**Top right:** Max Projection or Standard Deviation Project of the image sequence.

**Bottom right:** Numerical data, based on the “DPT Curve column” that the user has specified in the plot controls. If exploring peak feature based data the temporal span of the peak will be highlighted.

**Top left:** Analysis log, a ordered list of operations and their parameters.

**Bottom left:** All other data associated with this datapoint (the data present in the other columns of the row this datapoint is present in, see [Transmission](#))

**Open in viewer button:** Open the parent Sample of the current datapoint in the viewer.



## 1.30 Heatmap

### API Reference

**Note:** This plot can be saved in an interactive form, see *Saving plots*

Visualize numerical arrays in the form of a heatmap. Also used for visualization of Hierarchical clustering dendrograms. *Datapoint Tracer* is embedded.

### 1.30.1 Video Tutorial

This tutorial shows how the Heatmap plot can be used along with the Datapoint Tracer during the latter half of this tutorial.

### 1.30.2 Layout

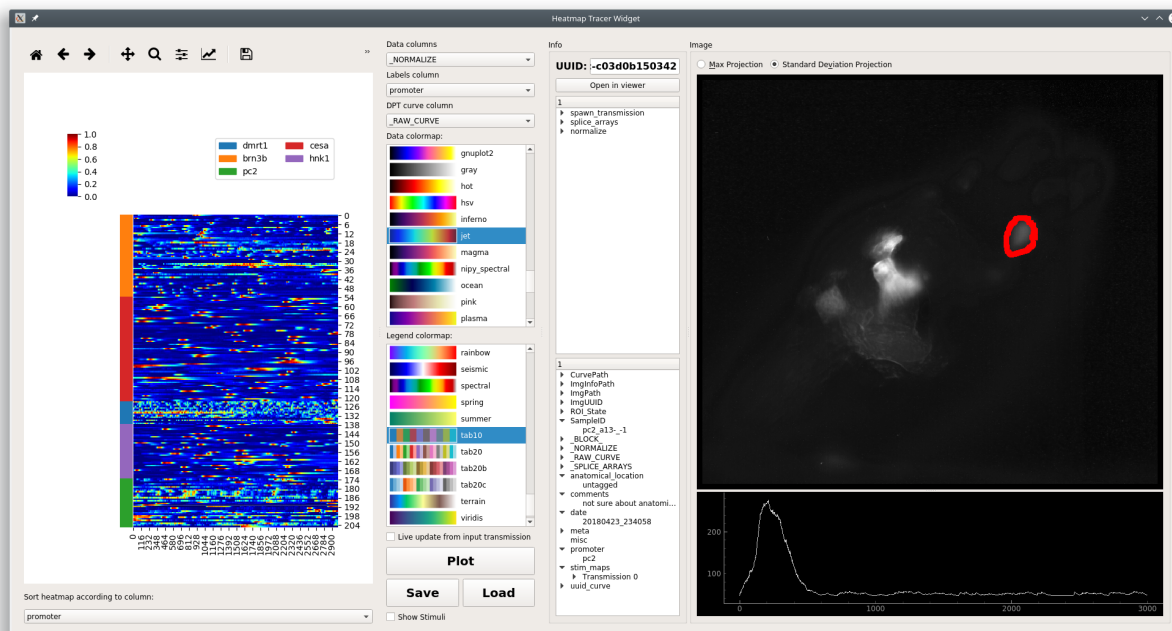

**Left:** The heatmap. Clicking the heatmap highlights the selected row and updates the *Datapoint Tracer*. Right click on the heatmap to clear the selection highlight on the heatmap. You can zoom and pan the heatmap using the tools above the plot area. You can zoom/pan in the legend and heatmap. The up and down keys on your keyboard can be used to move the current row selection.

**Bottom left:** Set the row order of the heatmap according to a categorical column.

**Middle:** Plot controls.

**Very bottom:** Status label - displays any issues that were raised while setting the plot data. Click on the status label to see more information.

### 1.30.3 Parameters

**Data column:** Data column, numerical arrays, that contain the data for the heatmap. Each row of this data column (a 1D array) is represented as a row on the heatmap.

**Labels column:** Column containing categorical labels that are used to create the row legend for the heatmap.

**DPT curve column:** Data column, containing numerical arrays, that is shown in the *Datapoint Tracer*.

**Data colormap:** Colormap used for representing the data in the heatmap. Default is ‘jet’.

**Legend colormap:** Colormap used for the row legend.

**Live update from input transmission:** If checked this plots receives live updates from the *flowchart*.

**Plot:** Updates data input from the flowchart.

**Save:** *Save the plot data and state in an interactive form*

**Load:** Load a plot that has been saved as a “.ptrn” file.

**Layout to visualize Hierarchical Clustering**

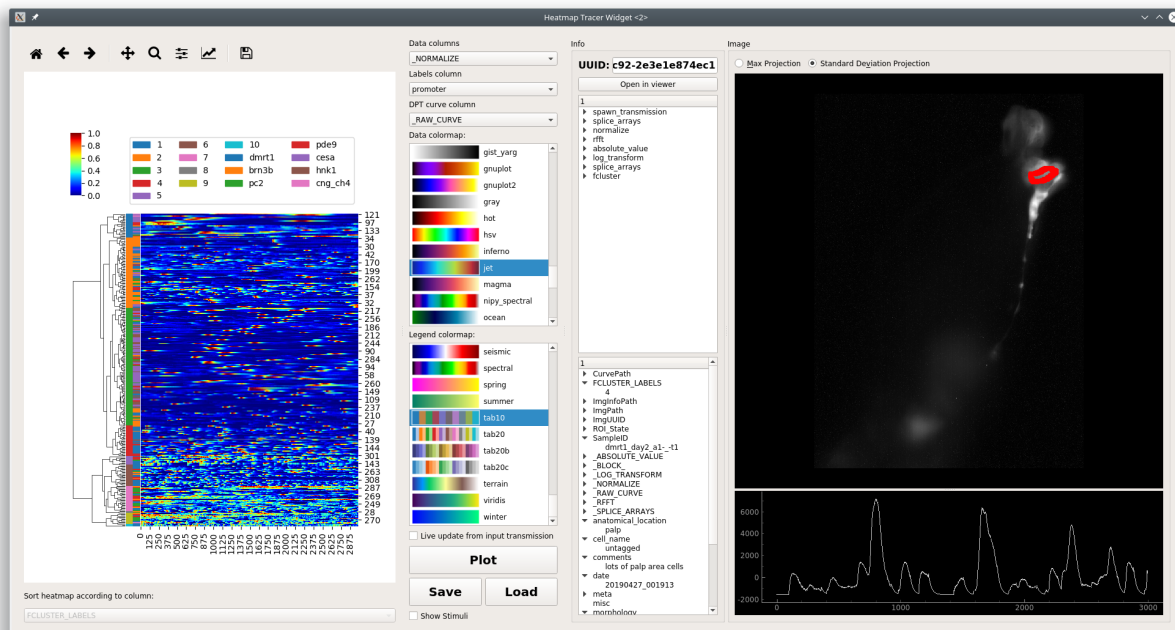

This plot widget can also be used to visualize a dendrogram on top of a heatmap of data.

The differences are:

1. There are two legend bars
  - Left: Cluster label
  - Right: Corresponds to Labels column parameter.
2. You can also zoom/pan the dendrogram in addition to the legends and heatmap.
3. Sorting the heatmap rows is disabled because this wouldn't make sense

### 1.30.4 Console

You can directly access the heatmap widget through the console. This is useful for plot customization and exporting with specific parameters.

Toggle the console's visibility by clicking on the “Show/Hide Console” button at the bottom of the controls.

**See also:**

*API Reference*

#### Namespace

| reference            | Description                                                                             |
|----------------------|-----------------------------------------------------------------------------------------|
| this                 | The higher-level <i>HeatmapTracerWidget</i> instance, i.e. the entire widget            |
| this.transmission    | Current input <i>Transmission</i>                                                       |
| get_plot_area()      | Returns the lower-level <i>Heatmap</i> variant instance, basically the actual plot area |
| get_plot_area().plot | Returns the seaborn ClusterGrid instance containing the axes                            |
| get_plot_area().fig  | Returns the matplotlib <i>Figure</i> instance                                           |

#### Attributes of get\_plot\_area().plot

For example, the heatmap axes object can be retrieved through `get_plot_area().plot.ax_heatmap`. See the usage examples.

|                   |                     |
|-------------------|---------------------|
| ax_heatmap        | Heatmap axes        |
| ax_row_dendrogram | Row dendrogram axes |
| ax_col_dendrogram | Used for the legend |
| cax               | Colorbar axes       |

#### Examples

##### Export

**See also:**

matplotlib API for: `Figure.savefig`, `Figure.set_size_inches`, `Figure.get_size_inches`

```

1  # Desired size (width, height)
2  size = (2.0, 2.5)
3
4  # Get the figure
5  fig = get_plot_area().fig
6
7  # original size to reset the figure after we save it
8  orig_size = fig.get_size_inches()
9
10 #Set the desired size
11 fig.set_size_inches(size)
12
13 # Save the figure as a png file with 1200 dpi
14 fig.savefig('/share/data/temp/kushal/amazing_heatmap.png', dpi=1200, bbox_inches='tight',
    ↪ pad_inches=0)

```

(continues on next page)

(continued from previous page)

```

15
16 # Reset the figure size and draw()
17 fig.set_size_inches(orig_size)
18 get_plot_area().draw()

```

**Note:** The entire plot area might go gray after the figure is reset to the original size. I think this is a Qt-matplotlib issue. Just resize the window a bit and the plot will be visible again!

**Warning:** From my experience I have not been able to open clustermap SVG files saved with very high DPI (600+). Even with 32 cores & 128GB of RAM both inkscape and illustrator just hang \\_()\\_/ . Try png or other formats.

## x tick labels

### See also:

matplotlib.axes.Axes.set\_xticklabels, matplotlib.axes.Axes.set\_xticks.

If the data are in the time domain:

```

1 from mesmerize.analysis import get_sampling_rate
2 import numpy as np
3
4 # Get the sampling rate of the data
5 sampling_rate = get_sampling_rate(this.transmission)
6
7 # Number of frames currently displayed in the heatmap
8 num_frames = get_plot_area().data.shape[1]
9
10 # Set an appropriate interval
11 interval = 30 # This is in seconds, not frames
12
13 # Get the recording time in seconds
14 recording_time = int(num_frames / sampling_rate)
15
16 # Set the new ticks
17 get_plot_area().plot.ax_heatmap.set_xticks(np.arange(0, num_frames, interval * sampling_
↳rate))
18
19 # Set the tick labels
20 # You can change the fontsize here
21 get_plot_area().plot.ax_heatmap.set_xticklabels(np.arange(0, recording_time, interval),
↳fontdict={'fontsize': 4})
22
23 # Set a title for the x axis. You can change the fontsize here
24 get_plot_area().plot.ax_heatmap.set_xlabel('Time (seconds)', fontdict={'fontsize': 6})
25
26 # Draw the plot with these changes
27 get_plot_area().draw()

```

**Note:** You may need to resize the dock widget that the plot is present in to display the newly drawn plot, this is a Qt-matplotlib issue.

---

If the data are in the frequency domain:

```
1 from mesmerize.analysis import get_frequency_linspace
2 import numpy as np
3
4 # Get frequency linspace and Nyquist frequency
5 freqs, nf = get_frequency_linspace(this.transmission)
6
7 # Get the number of frequencies currently shown in the heatmap
8 num_freqs = get_plot_area().data.shape[1]
9
10 # The max frequency currently display in the heatmap
11 max_freq = freqs[num_freqs - 1]
12
13 # Set an appropriate interval
14 interval = 0.25 # This is in Hertz
15
16 # Set the tick labels
17 # Set the new ticks
18 get_plot_area().plot.ax_heatmap.set_xticks(np.arange(0, num_freqs, (num_freqs *
19     ↪ interval) / max_freq))
20
21 # You can change the fontsize here
22 get_plot_area().plot.ax_heatmap.set_xticklabels(np.arange(0, max_freq, interval),
23     ↪ fontdict={'fontsize': 4})
24
25 # Set a title for the x axis. You can change the fontsize here
26 get_plot_area().plot.ax_heatmap.set_xlabel('Frequency (Hertz)', fontdict={'fontsize': 6})
27
28 # Draw the plot with these changes
29 get_plot_area().draw()
```

**Note:** You may need to resize the dock widget that the plot is present in to display the newly drawn plot, this is a Qt-matplotlib issue.

---

### Colorbar label

```
get_plot_area().plot.cax.set_title('norm. z-score', x=-0.25, y=0.65, fontdict={'fontsize': 6}, rotation=90)
get_plot_area().draw()
```

### Axes visibility

Hide/show legend

```
get_plot_area().plot.ax_col_dendrogram.set_visible(False)
get_plot_area().draw()
```

Hide/show y axis (similar for x axis)

```
get_plot_area().plot.ax_heatmap.get_yaxis().set_visible(False)
get_plot_area().draw()
```

Hide/show colorbar

```
get_plot_area().plot.cax.set_visible(False)
get_plot_area().draw()
```

## 1.31 KShape

Perform KShape clustering.

I recommend reading the paper on it: Paparrizos, John, and Luis Gravano. “k-Shape: Efficient and Accurate Clustering of Time Series.” In Proceedings of the 2015 ACM SIGMOD International Conference on Management of Data, pp. 1855-1870. ACM, 2015.

This GUI uses the `tslearn.clustering.KShape` implementation.

**See also:**

*API reference*

---

**Note:** This plot can be saved in an interactive form, see *Saving plots*

---

**Layout**

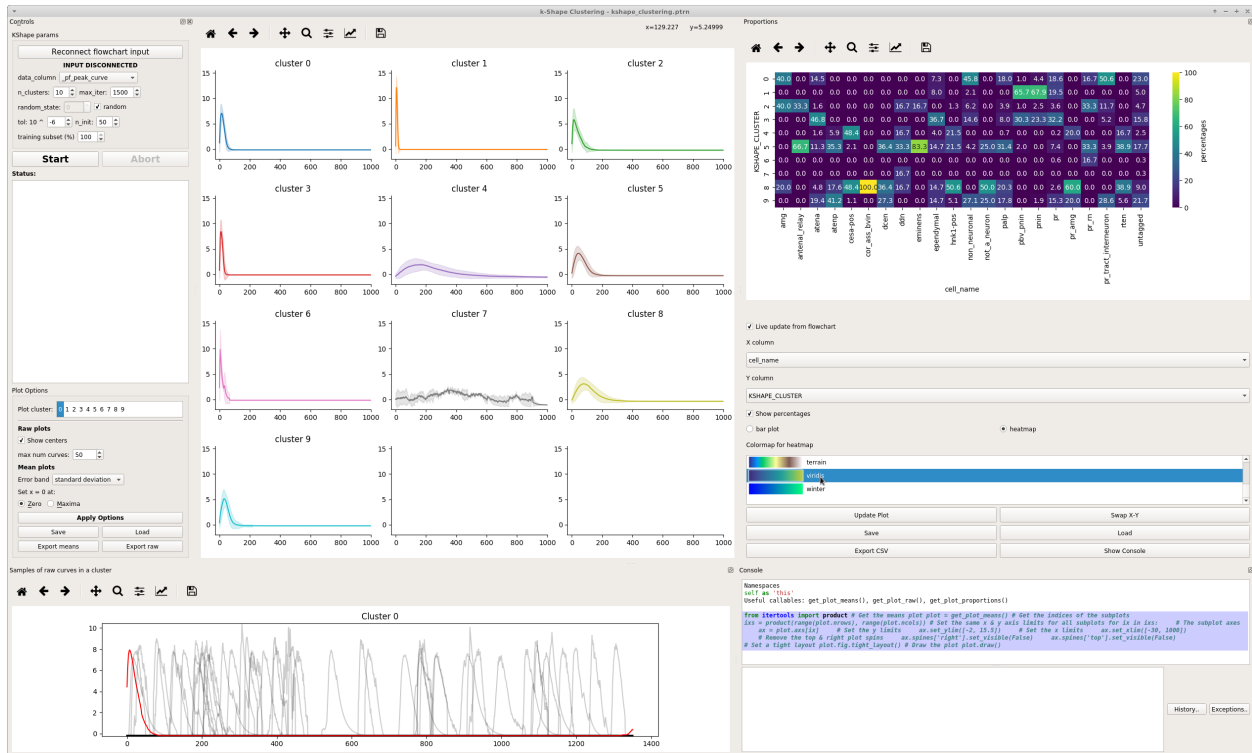

Left: KShape parameters and Plot parameters

Bottom left: Plot of a random sample of input data from a cluster.

Center: Plot of cluster mean and either confidence interval, standard deviation, or neither. Uses `seaborn.lineplot`

Right: Proportions plot. Exactly the same as `Proportions`.

Bottom Right: Console

### 1.31.1 KShape Parameters

The parameters and input data are simply fed to `tslearn.clustering.KShape`

Parameters outlined here are simply as they appear in the `tslearn` docs.

**data\_column:** Input data for clustering.

**n\_clusters:** Number of clusters to form.

**max\_iter:** Maximum number of iterations of the k-Shape algorithm.

**tol:** Inertia variation threshold. If at some point, inertia varies less than this threshold between two consecutive iterations, the model is considered to have converged and the algorithm stops.

**n\_init:** Number of times the k-Shape algorithm will be run with different centroid seeds. The final results will be the best output of `n_init` consecutive runs in terms of inertia.

**random\_state:** Generator used to initialize the centers. If an integer is given, it fixes the seed. Defaults to the global numpy random number generator.

**training\_subset:** The subset of the input data that are used for used for training. After training, the predictions are fit on all the input data.

### 1.31.2 Plot Options

**Plot cluster:** The cluster from which to plot random samples of input data in the bottom left plot

**Show centers:** Show the centroids returned by the KShape model

**Warning:** There's currently an issue where cluster centroids don't appear to be index correctly. See <https://github.com/rtavenar/tslearn/issues/114>

**max num curves:** Maximum number of input data samples to plot

**Error band:** The type of data to show for the the error band in the means plots.

**set x = 0 at:** The zero position of a means plots with respect to the cluster members in the plot.

**Save:** *Save the plot data and state in an interactive form*

### 1.31.3 Console

The console can be useful for formatting plots, inspecting the underlying data etc.

**See also:**

*API reference*

#### Namespace

| reference              | Description                                                                     |
|------------------------|---------------------------------------------------------------------------------|
| this                   | The higher-level <i>KShape</i> widget instance, i.e. the entire widget          |
| this.transmission      | Current input <i>Transmission</i>                                               |
| get_plot_means()       | Returns the means plot                                                          |
| get_plot_raw()         | Returns the raw plot                                                            |
| get_plot_proportions() | Returns the proportions plot, which is an instance of <i>Proportions Widget</i> |

#### Examples

**See also:**

*matplotlib Axes*

#### Set axis ranges

Set equal x & y axis ranges for the means plots. Also removes the top & right spines.

```

1 from itertools import product
2
3 # Get the means plot
4 plot = get_plot_means()
5
6 # Get the indices of the subplots
7 idx = product(range(plot.nrows), range(plot.ncols))

```

(continues on next page)



(continued from previous page)

```

8
9 # Set the same x & y axis limits for all subplots
10 for ix in ixes:
11
12     # The subplot axes
13     ax = plot.axes[ix]
14
15     # Set the y limits
16     ax.set_ylim([-2, 15.5])
17
18     # Set the x limits
19     ax.set_xlim([-30, 1000])
20
21     # Remove the top & right plot spines
22     ax.spines['right'].set_visible(False)
23     ax.spines['top'].set_visible(False)
24
25 # Set a tight layout
26 plot.fig.tight_layout()
27
28 # Draw the plot
29 plot.draw()

```

---

**Note:** You may need to resize the dock widget that the plot is present in to display the newly drawn plot, this is a Qt-matplotlib issue.

---

### x tick labels

Set the x tick labels in time units instead of frames

**See also:**

[matplotlib.axes.Axes.set\\_xticklabels](#) | [matplotlib.axes.Axes.set\\_xticks](#).

```

1 import numpy as np
2 from itertools import product
3 from mesmerize.analysis import get_sampling_rate
4
5 # Get the sampling rate of the data
6 sampling_rate = get_sampling_rate(this.transmission)
7
8 # Get the padded number of frames that are shown in the plots
9 num_frames = this.cluster_centers.shape[1]
10
11 # Set an appropriate interval
12 interval = 5 # This is in seconds, not frames
13
14 # Convert the padded frame number to time units
15 total_time = int(num_frames / sampling_rate)
16

```

(continues on next page)

(continued from previous page)

```

17 ix = product(range(4), range(3))
18
19 # Set these time units for all the means plots
20 # For the raw plots just remove the loop
21 for ix in ix:
22     # Get the axes
23     ax = get_plot_means().axs[ix]
24
25     # Set the new ticks
26     ax.set_xticks(np.arange(0, num_frames, interval * sampling_rate))
27
28     # Set the tick labels
29     # You can change the fontsize here
30     ax.set_xticklabels(np.arange(0, total_time, interval), fontdict={'fontsize': 4}, ↵
↵rotation=90)
31
32     # Set a title for the x axis. You can change the fontsize here
33     ax.set_xlabel('Time (seconds)', fontdict={'fontsize': 6})
34
35     # Set ylabel as well
36     ax.set_ylabel('z-score', fontdict={'fontsize': 6})
37
38 # Set a tight layout
39 get_plot_means().fig.tight_layout()
40
41 # Draw the plot with these changes
42 get_plot_means().draw()

```

**Note:** You may need to resize the dock widget that the plot is present in to display the newly drawn plot, this is a Qt-matplotlib issue.

## Hide legend

Hide/show legend in the proportions plot

```

get_plot_proportions().ax.legend().set_visible(True)
get_plot_proportions().draw()

```

## Export

You can export any of the plots with a specific size & DPI.

Replace the `get_<plot>().fig` on *line 5* with the desired plot.

### See also:

matplotlib API for: [Figure.savefig](#), [Figure.set\\_size\\_inches](#), [Figure.get\\_size\\_inches](#)

```
1 # Desired size (width, height)
2 size = (7.0, 10.0)
3
4 # Get the figure
5 fig = get_<plot>().fig
6
7 # original size to reset the figure after we save it
8 orig_size = fig.get_size_inches()
9
10 #Set the desired size
11 fig.set_size_inches(size)
12
13 # Save the figure as an png file with 600 dpi
14 fig.savefig('/share/data/temp/kushal/amazing_shapes.png', dpi=600, bbox_inches='tight',
15             ↪pad_inches=0)
16
17 # Reset the figure size and draw
18 fig.set_size_inches(orig_size)
19 get_<plot>().draw()
```

---

**Note:** The entire plot area might go gray after the figure is reset to the original size. I think this is a Qt-matplotlib issue. Just resize the window a bit and the plot will be visible again!

---

## 1.32 Peak Editor

Visualize and edit detected peaks & bases. This GUI is accessible through the *PeakDetect* node.

### 1.32.1 Video Tutorial

### 1.32.2 Usage

- Optimize your peaks/bases detection through the datastreams that feed into the *Derivative* and *Normalize* terminals of the parent *PeakDetect* node. For example, play with filtering parameters for the *ButterWorth* node or *SavitzkyGolay* node.
- Optimize amplitude thresholds of the parent *PeakDetect* node.
- Disconnect from the flowchart (see below).
- Edit your peaks/bases
- Click “Send all curves to flowchart” (see below) to set the edited data as the output of the parent *PeakDetect* node.

## Layout

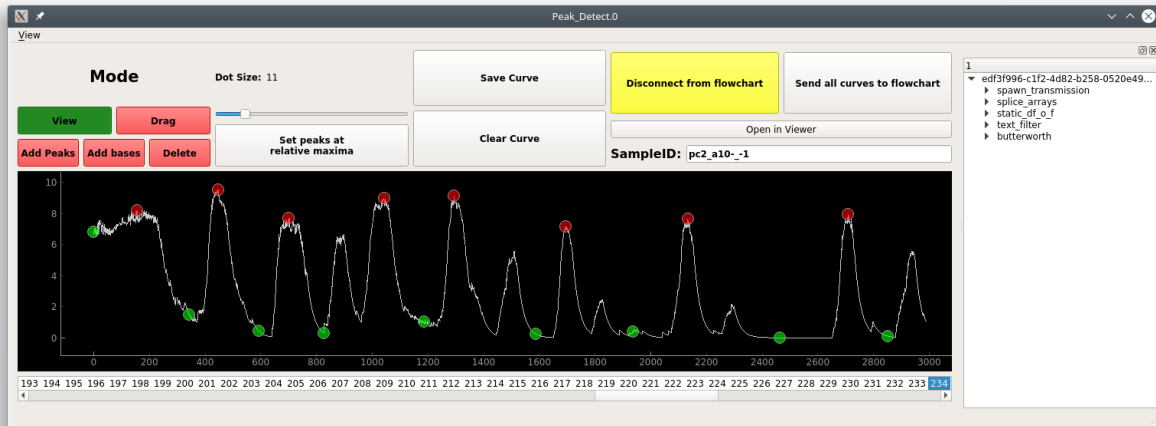

## Bottom

List of curves from the Transmission inputted to the *Curve* or *PB\_Input* terminal. See *PeakDetect* node

## Top

**Mode buttons:** Set the current interactive mode for mouse events.

*View:* Just view, pan, and zoom the plot.

*Drag:* Click and drag peaks/bases along the curve.

*Add Peak/Base:* Click to add a peak/base onto the curve.

*Delete:* Delete a peak or base.

**Dot Size:** Move the slider to change the size of the dots representing peaks/bases.

**Set Peaks at relative maxima:** Not implemented yet.

**Save Curve:** Save the current curve. A curve auto-saved when you switch to another one.

**Clear Curve:** Not implemented.

**Disconnect from flowchart:** Disconnect the GUI from changes in the flowchart. Edits to the peaks/bases will be lost if this GUI is not disconnected while changes occur in the flowchart.

**Send all curves to flowchart:** Set the edited data as the output of the parent *PeakDetect* node

**Open in viewer:** Open the parent Sample of this curve in a *Viewer*.

## Right

History Tree Widget

## 1.33 Proportions

*API Reference*

---

**Note:** *This plot can be saved in an interactive form*

---

Compare proportions of categorical variables between different groups using bar charts.

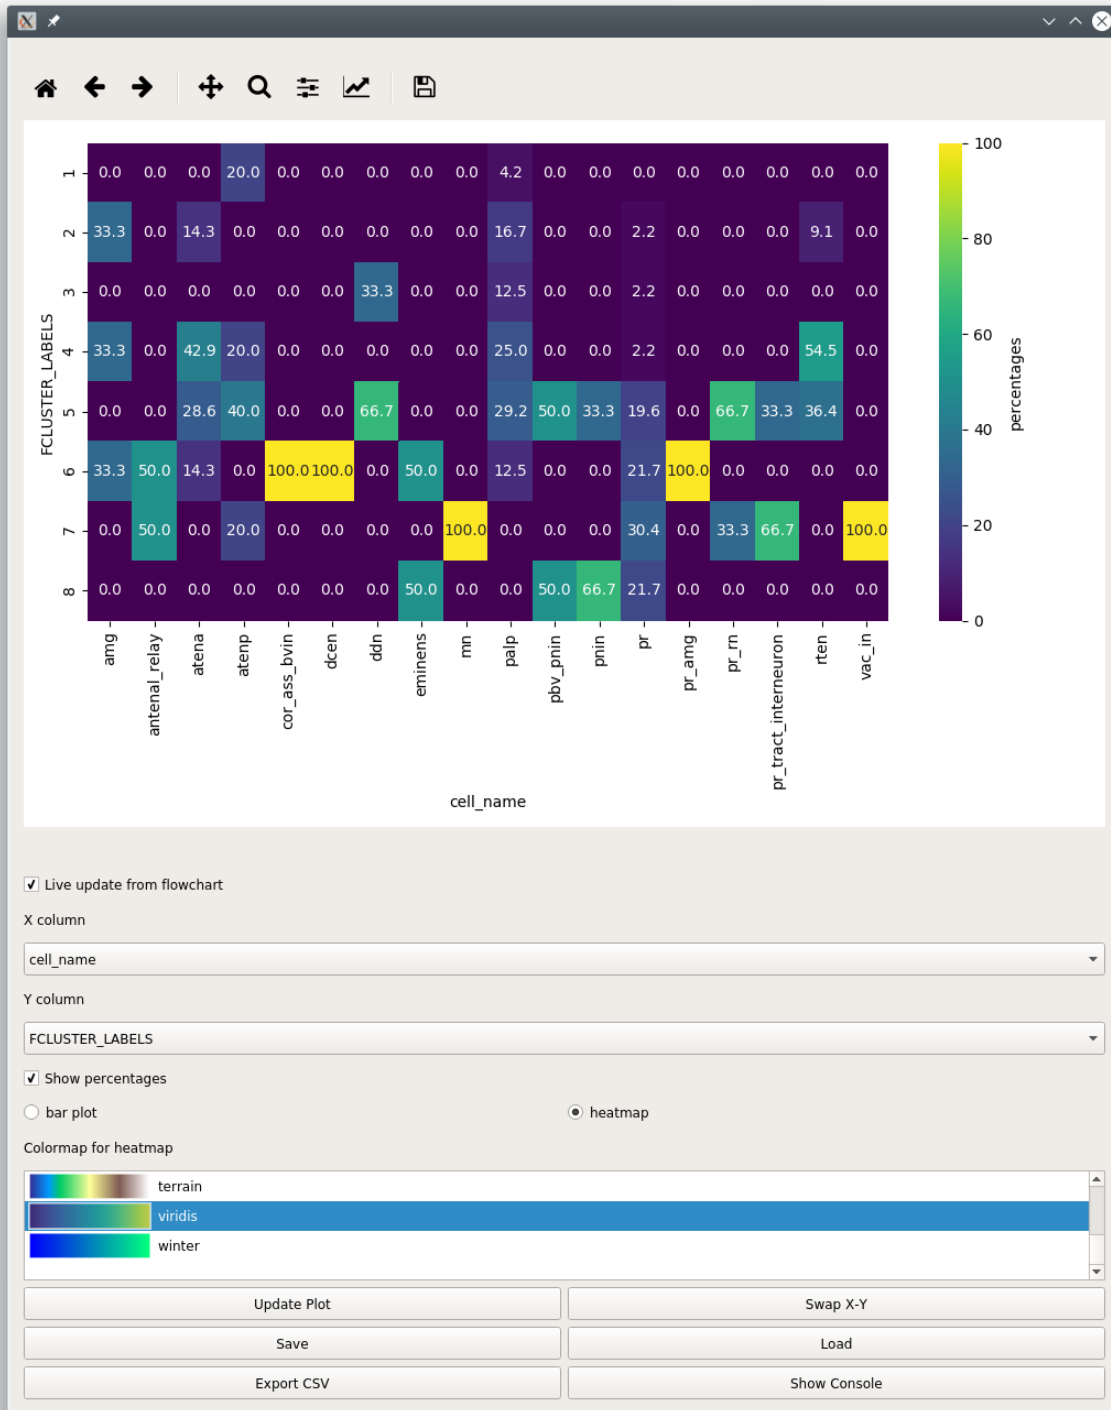

| Parameter        | Description                                                                                                                                               |
|------------------|-----------------------------------------------------------------------------------------------------------------------------------------------------------|
| X column         | DataFrame column containing the categorical labels used for grouping the data<br>Data in each X column sums to 100% if <i>Show percentages</i> is checked |
| Y column         | DataFrame column containing the categorical labels that are counted for each group                                                                        |
| Show percentages | When unchecked shows raw counts                                                                                                                           |
| bar plot         | Visualize as bar plots                                                                                                                                    |
| heatmap          | Visualize as a heatmap                                                                                                                                    |
| Update Plot      | Update plot                                                                                                                                               |
| Swap X-Y         | Swap X & Y columns                                                                                                                                        |
| Save             | <i>Save this plot as a ptrn file</i>                                                                                                                      |
| Load             | <i>Load from a ptrn file</i>                                                                                                                              |
| Export CSV       | Export the data for the current plot as to a csv file.                                                                                                    |
| Show Console     | Show/hide the console                                                                                                                                     |

## 1.34 Scatter

*API Reference*

### Interactive scatter plot

---

**Note:** *This plot can be saved in an interactive form*

---

#### 1.34.1 Video Tutorial

From 13:04 onward this tutorial shows how you can perform PCA and visualize the transformed data using the Scatter Plot.

## 1.34.2 Layout

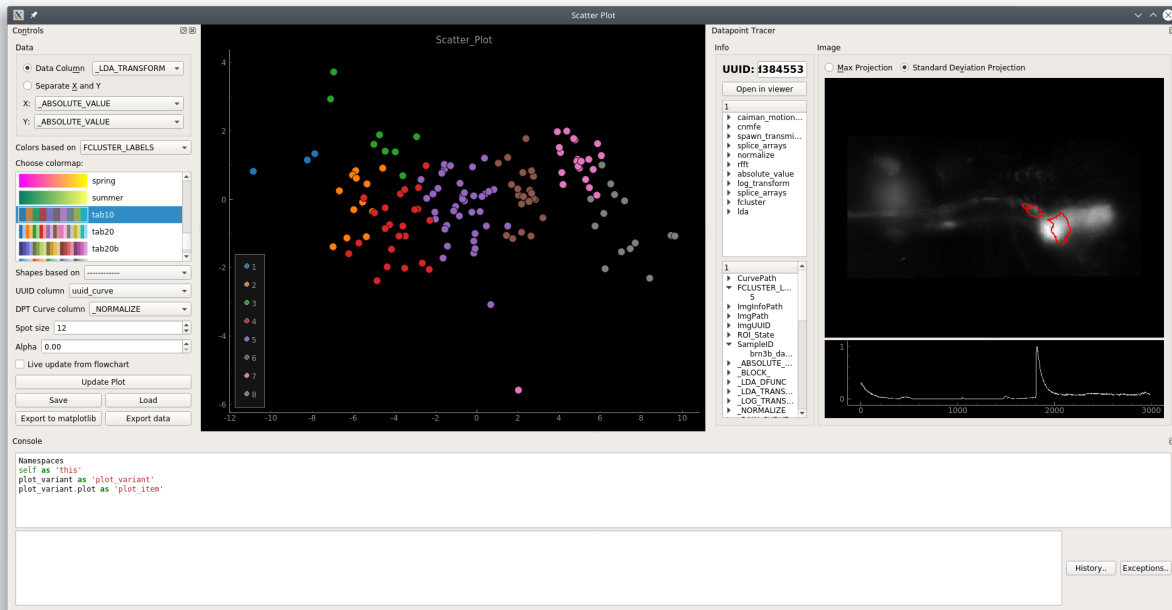

### Left: Controls

| Control          |                                                                                   |
|------------------|-----------------------------------------------------------------------------------|
| Data Column      | Data column containing numerical arrays of size 2, X & Y values [x, y]            |
| X                | Data column containing only X values                                              |
| Y                | Data column containing only Y values                                              |
| log x            | Use $\log_{10}$ of the X data                                                     |
| log y            | Use $\log_{10}$ of the Y data                                                     |
| Colors based on  | Set spot colors based on categorical labels in this column                        |
| Choose colormap  | Colormap for the the spot colors                                                  |
| Shapes based on  | Set spot shapes based on categorical labels in this column                        |
| UUID Column      | Column containing UUIDs that correspond to the plot data                          |
| DPT Curve column | Data column containing numerical arrays to show in the <i>Datapoint Tracer</i>    |
| Spot size        | Size of the spots                                                                 |
| Alpha            | Not implemented yet                                                               |
| Live update...   | Update the plot with live inputs from the flowchart                               |
| Update Plot      | Update the plot according to the input data from the flowchart and the parameters |
| Save             | <i>Save the plot as a ptrn file</i>                                               |
| Load             | <i>Load a saved ptrn file</i>                                                     |
| Export to ma...  | Not implemented yet                                                               |
| Export data      | Not implemented yet                                                               |

**Below the plot:** Status label that displays plotting issues. Click the label to see more information.

**Right:** *Datapoint Tracer*. Click datapoints in the plot to set the Datapoint Tracer.

**Bottom:** *Console*



## 1.35 Simple Plot

Just a very basic time-series plot. It will plot all the data in the selected data column.

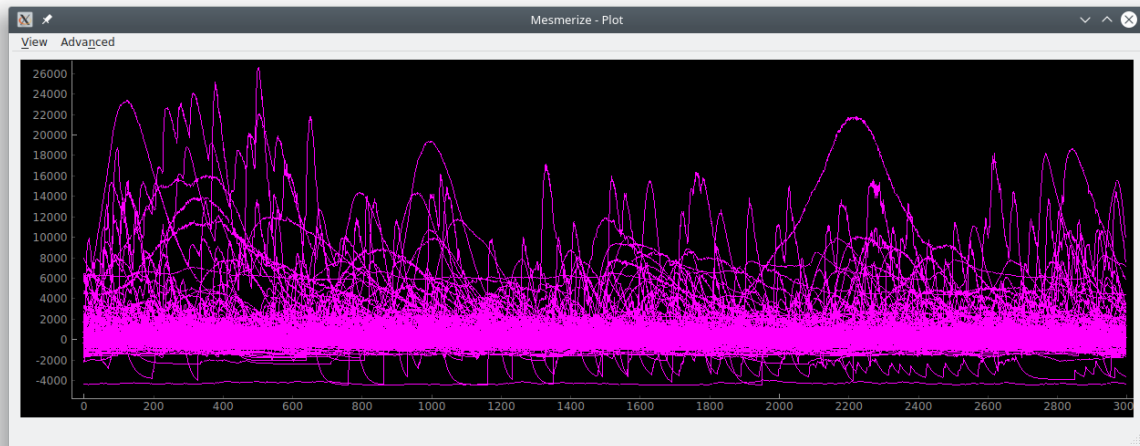

## 1.36 SpaceMap

*API Reference*

---

**Note:** This plot can be saved in an interactive form, see *Saving plots*

---

Spatially map a categorical variable onto a projection of a Sample's image sequence

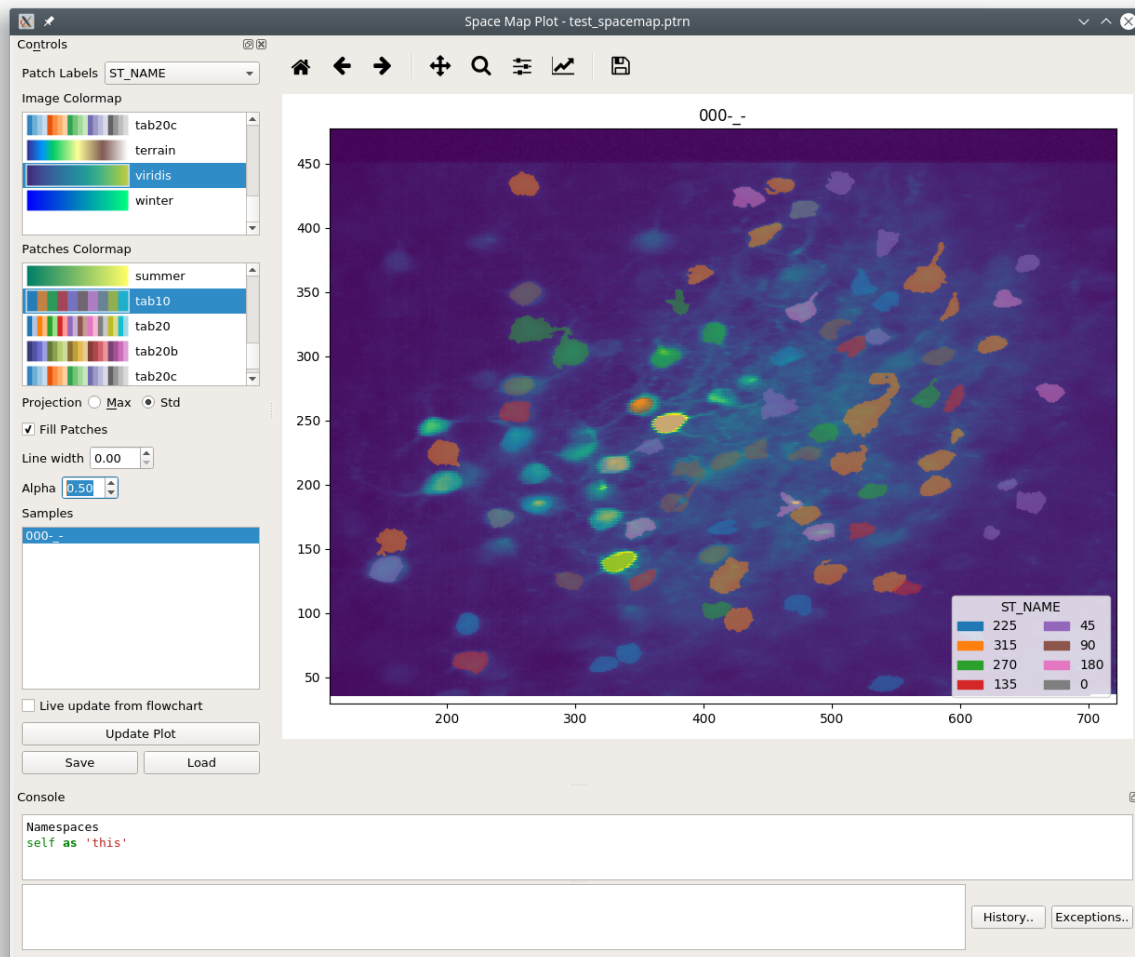

**Note:** Image produced from the following dataset: Garner, Aleena (2014): In vivo calcium imaging of layer 4 cells in the mouse using sinusoidal grating stimuli. CRCNS.org. <http://dx.doi.org/10.6080/K0C8276G>

### 1.36.1 Video Tutorial

This shows how you can view a space map that shows the tuning of cells. The Space map plot itself is shown after 3:38.

## 1.36.2 Controls

| Parameter        | Description                                                  |
|------------------|--------------------------------------------------------------|
| Patch labels     | Categorical column to use for the patch labels               |
| Image Colormap   | Colormap for the image                                       |
| Patches Colormap | Colormap for the patches                                     |
| Projection       | Show the image as a “Max” or “Standard Deviation” projection |
| Fill Patches     | Fill the patches                                             |
| Line width       | Line width of the patches                                    |
| Alpha            | Alpha level of the patches                                   |
| Samples          | Click on the sample to plot                                  |
| Save             | <i>Save the plot data and state in an interactive form</i>   |
| Load             | Load a plot that has been saved as a “.ptrn” file.           |

## 1.36.3 Console

See also:

*API Reference*

### Namespace

| reference         | Description                                                  |
|-------------------|--------------------------------------------------------------|
| this              | The <i>SpaceMapWidget</i> instance, i.e. the entire widget   |
| this.transmission | Current input <i>Transmission</i>                            |
| get_plot()        | Returns the plot area                                        |
| get_plot().fig    | Returns the matplotlib <i>Figure</i> instance                |
| get_plot().ax     | Returns the Axes for the current plot matplotlib <i>Axes</i> |

### Examples

#### Export

See also:

matplotlib API for: `Figure.savefig`, `Figure.set_size_inches`, `Figure.get_size_inches`

```
1 # Desired size (width, height)
2 size = (6,5)
3
4 # Get the figure
5 fig = get_plot().fig
6
7 # original size to reset the figure after we save it
8 orig_size = fig.get_size_inches()
9
10 #Set the desired size
11 fig.set_size_inches(size)
12
```

(continues on next page)

(continued from previous page)

```
13 # Save the figure as a png file with 600 dpi
14 fig.savefig('/share/data/temp/kushal/spacemap.png', dpi=600, bbox_inches='tight', pad_
    ↪ inches=0)
15
16 # Reset to original size and draw
17 fig.set_size_inches(orig_size)
18 get_plot().draw()
```

**Note:** The entire plot area might go gray after the figure is reset to the original size. I think this is a Qt-matplotlib issue. Just resize the window a bit and the plot will be visible again!

## Legend Title

### See also:

matplotlib API for `matplotlib.axes.Axes.get_legend`

```
get_plot().ax.get_legend().set_title('New Title')
get_plot().draw()
```

## Hide Axis Borders

### See also:

matplotlib API for `matplotlib.axes.Axes.axis`

```
get_plot().ax.axis('off')
get_plot().draw()
```

## 1.37 Stimulus Tuning

Get the stimulus tuning and tuning curves of neurons.

The output from this plot node can also be used for various things downstream, such as hierarchical clustering to sort your cells based on their tuning, visualizing the tuning of each neuron using a *SpaceMap plot*, and much more. See the video tutorial for examples.

### 1.37.1 Video Tutorial

This tutorial uses part of the [CRCNS pvc-7 dataset](#) from the Allen Institute to get stimulus tuning curves, perform hierarchical clustering and dimensionality reduction.

### 1.37.2 Layout

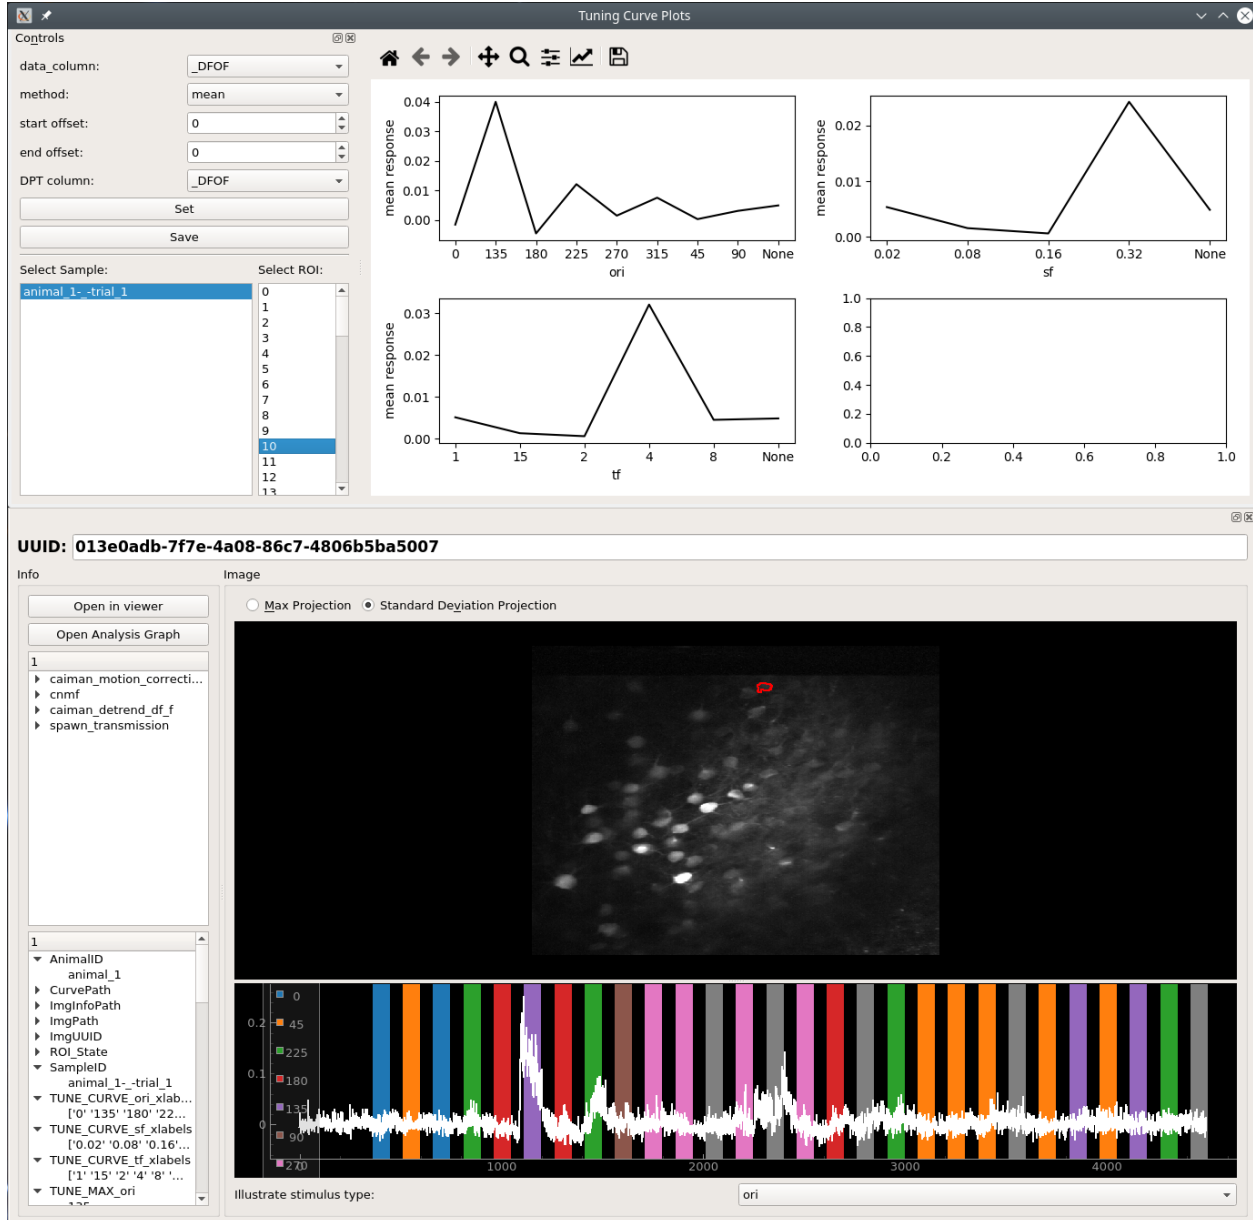

### 1.37.3 Controls

| Parameter    | Description                                                                                   |
|--------------|-----------------------------------------------------------------------------------------------|
| data_column  | Data column used to determine the stimulus tuning of the cells                                |
| method       | Use one of mean, median, max or min response within a stimulus period to determine the tuning |
| start offset | Use a start offset for the stimulus periods (can be either positive or negative)              |
| end offset   | Use a end offset for the stimulus periods (can be either positive or negative)                |
| DPT column   | Data column that is shown in the <i>Datapoint Tracer</i> .                                    |
| Set          | Set the stimulus extraction parameters defined above.                                         |
| Save         | <i>Save the plot data and state in an interactive form</i>                                    |

### 1.37.4 Usage

1. Set the desired parameters for **data\_column**, **method**, **start offset**, **end offset** and **DPT column**.
2. Click **Set**.
3. Choose a Sample from the list.
4. Click on an ROI number to view the tuning curve, and corresponding spatial localization and curve in the *Data-point Tracer*.
5. You can use the output of this plot node for further analysis, as show in the tutorial video.

## 1.38 Welcome Window

The Welcome Window is the first window that you are presented with when you launch Mesmerize.

- Use the large buttons for opening new *Viewer* or *Flowchart* windows.
- Open a project using the button, or double-click a recent project from the list.
- Create a new project using the button.
- You basically have access to all objects in the Mesmerize instance through this console.

**See also:**

*User guide on creating new projects and Consoles*

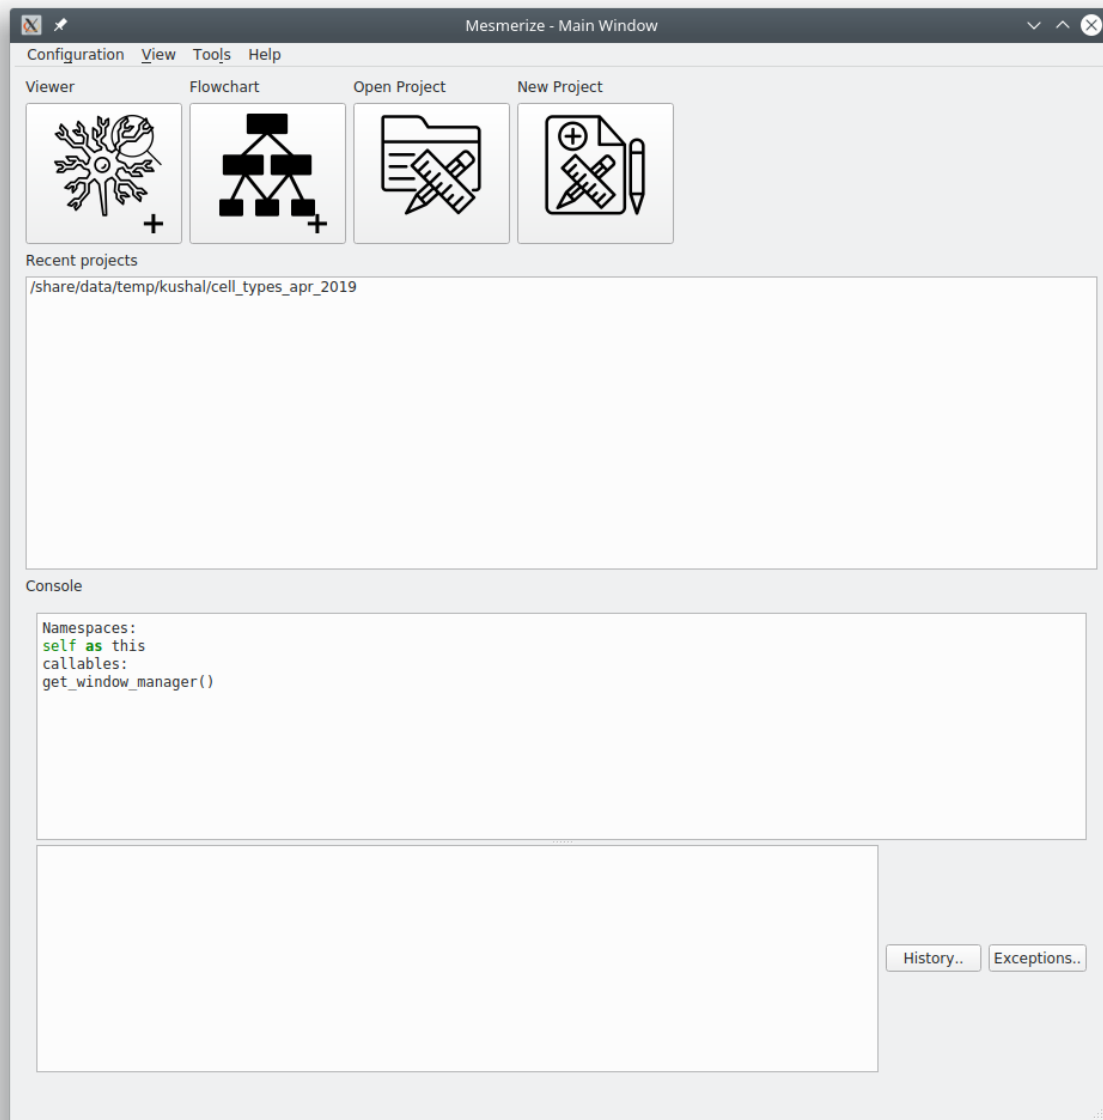

## 1.39 Project Structure

A Mesmerize project is encapsulated within a single directory. It contains the following:

- config file - contains configuration data, such as roi type columns, stimulus type columns, and custom columns with their datatypes.

**Warning:** Do not manually modify the config file

### Directories

| Dir        | Purpose                                                                                                                                                                                                             |
|------------|---------------------------------------------------------------------------------------------------------------------------------------------------------------------------------------------------------------------|
| dataframes | Contains an file storing the project dataframe, root.dfr, and backups.<br>A new backup is created every time a new <i>Sample</i> is <i>added to the project</i> .<br>Restore a backup by renaming it to “root.dfr”. |
| images     | Contains the image sequences and work environment data for all samples in the project                                                                                                                               |
| batches    | Used for storing batches used by the <i>Batch Manager</i> if you wish.                                                                                                                                              |
| flowcharts | Used for storing <i>.fc</i> flowchart files that save the layout of nodes in a flowchart.                                                                                                                           |
| plots      | Used for storing <i>.ptrn</i> interactive plot files.                                                                                                                                                               |

**See also:**

*Flowchart Overview* and *Saving Plots*

**Warning:** Do not manually modify the data under the **images** or **curves** directories

## 1.40 Consoles

A Python console is embedded in many parts of Mesmerize. You can use it to perform very specific operations, further automate tasks, save an analysis object, format plots, etc.

The console is accessible in many windows through View -> Console. Within the console namespace `this` refers to the window. For example `this` refers to the *Project Browser* Window instance in the Project Browser’s console. A list of useful object references and helper functions are listed when you open most consoles.

You can run entire scripts within the console. You can also use import statements to import libraries that you have in your Python environment.

Keyboard controls:

**Execute:** Shift + Enter

**New line:** Enter

**Scroll up through history:** Page Up

**Scroll down through history:** Page Down

The history is stored in `~/ .mesmerize`

## 1.41 Saving plots

Some plots allow you to save them in an interactive form, along with the plot data and the plot state as a “.ptrn” file. If you save the file in the “plots” directory of your project it will be listed in the *Welcome Window* when you open your project.

This is currently possible with the following plots: *Heatmap*, *KShape*, *Proportions*, *Scatter*, and *SpaceMap*



## 1.42 Plot Navbar

Many plots have a navigation toolbar which you can use to zoom, pan, configure plots, and export plots as images.

Official matplotlib docs about the navigation toolbar: [https://matplotlib.org/2.1.2/users/navigation\\_toolbar.html](https://matplotlib.org/2.1.2/users/navigation_toolbar.html)

**Home:** Reset the plot (not applicable for all plots)

**Pan:** Pan the plot

**Zoom:** Zoom in/out a selection using the left/right mouse button respectively

**Subplot-configuration:** Options to adjust spacing, borders, set tight layout.

**Edit axis, curve...:** For some plots. Options for formatting x & y axis limits, labels, select line style, color, etc.

**Save:** Export the figure as an image. **This is not the same as saving an interactive plot, see “Saving Plots” above.**

## 1.43 System Configuration

### Set system configuration options

This window is accessible through the *Welcome Window* menubar at Configuration -> System Configuration.

Form

Maximum number of threads to use: 7 Python call: python3

Use CUDA - Disabled, could not import libraries See details Work dir /work/kushal

Any prior commands to run for computations performed in separate processes (such as batch items)

```
# For example if you are running in an anaconda environment
# export PATH="/home/<user>/anaconda3:$PATH"
# source activate my_environment
# Or if you are using a python virtual environment
# source /home/<user>/python_envs/my_venv/bin/activate
# Adjust these according to your hardware
export MKL_NUM_THREADS=1
export OPENBLAS_NUM_THREADS=1
```

Plugins directory (Optional): /home/kushal/mesmerize\_custom\_modules

Reset defaults Reload Config File Close Apply

**Maximum number of threads to use:** The maximum number of threads that Mesmerize is allowed to use, this includes processes started by the *Batch Manager*, various analysis processes in the flowchart, and the viewer as well.

**Python call:** Many parts of Mesmerize, such as the *Batch Manager* use external processes to run a python script. This setting sets which python call should be used. `python3` should work for Linux & Mac OSX. We've found that this needs to be set to `python` to work within Anaconda environments on Windows.

**Use CUDA:** Use CUDA acceleration if you have a GPU with CUDA cores. You must have `pycuda` and `scikit-cuda` (as well as the `nvidia CUDA toolkit`) installed. CUDA acceleration isn't used much currently.

**Work dir:** Many parts of Mesmerize use a working directory for temporary files. If you have a fast filesystem you can use that for this purpose.

**Pre-run commands (large text entry):** Mesmerize runs some computationally intensive tasks in subprocesses. These commands are run prior to the python script that performs the task.

- If you are using Mesmerize in a virtual environment or conda environment you will need activate the environment so you must include the line `source /path_to_venv/bin/activate` or `conda activate <env_name>` to the pre-run commands.
- If you are using an Intel CPU you should get optimal performance by installing [Math Kernel Library \(MKL\)](#) and including `export MKL_NUM_THREADS=1` to the pre-run commands.
- If you are using an AMD CPU make sure you have OpenBLAS installed for optimal performance and include `export OPENBLAS_NUM_THREADS=1` to the pre-run commands. You may better performance by installing the [AMD specific libraries](#).

**Plugins directory:** If you have a plugins dir include enter its path here.

## 1.44 Nodes

The easiest way to create a new node is create a class that inherits from *CtrlNode*. You can place this class in one of the existing modules in `mesmerize/pyqtgraphCore/flowchart/library`

Become familiar with the *Transmission object* before creating a node. Almost all nodes work with a Transmission object for storing data. Make sure to conform to the conventions for naming of data columns and categorical columns.

### 1.44.1 Simple node

The simplest type of node performs an operation on a user-specified data column and doesn't take any parameters.

#### Basic structure

```
class MyNode(CtrlNode):
    """Doc String that is shown when node is clicked on"""
    nodeName = 'MyNode'
    uiTemplate = <list of tuples, see below>

    def processData(self, transmission: Transmission):
        self.t = transmission.copy() #: input to this node

        # .. do stuff to the Transmission DataFrame

        params = <dict of analysis params>

        # log the analysis that was done
```

(continues on next page)

(continued from previous page)

```

self.t.history_trace.add_operation('all', 'mynode', params)

# Send the output
return self.t

```

Required class attributes:

- **nodeName:** (str) The name prefix used when instances of this node are created in the flowchart
- **uiTemplate:** (list) List of UI element tuples (see section)

If the node only has one input and one output terminal it is sufficient to create a processData method that performs the node's analysis operation(s).

### Example

```

1 class Derivative(CtrlNode):
2     """Return the Derivative of a curve."""
3     nodeName = 'Derivative'
4     uiTemplate = [('data_column', 'combo', {}),
5                  ('Apply', 'check', {'checked': False, 'applyBox': True})
6                  ]
7
8     # If there is only one input and one output terminal, processData will
9     # always have a single argument which is just the input transmission,
10    # i.e. the output from the previous node.
11    def processData(self, transmission: Transmission):
12        # the input transmission
13        self.t = transmission
14
15        # If a comboBox widget named 'data_column' is specified in the
16        # uiTemplate, you can update its contents using the following method.
17        # This will populate the comboBox with all the data columns from the
18        # input transmission and select the input data column as the
19        # output data column from the previous node.
20        self.set_data_column_combo_box()
21
22        # Check if the Apply checkbox is checked
23        if self.ctrls['Apply'].isChecked() is False:
24            return
25
26        # Make a copy of the input transmission so we can modify it to create an output
27        self.t = transmission.copy()
28
29        # By convention output columns are named after the node's name and in all caps
30        # Columns containing numerical data have a leading underscore
31        output_column = '_DERIVATIVE'
32
33        # Perform this node's operation
34        self.t.df[output_column] = self.t.df[self.data_column].apply(np.gradient)
35
36        # Set transmission's `last_output` attribute as the name of the output column

```

(continues on next page)

(continued from previous page)

```

37 # This is used by the next node to know what the last output data was
38 self.t.last_output = output_column
39
40 # Create a dict of parameters that this node used
41 # Usually a dict that captures the state of the uiTemplate
42 # the transmission `last_unit` attribute is the data units of the data
43 # in the output column (i.e. `t.last_output`). Change it only if the data units change
44 params = {'data_column': self.data_column,
45          'units': self.t.last_unit
46          }
47
48 # Add a log of this node's operation to the transmission's `HistoryTrace` instance
49 # Nodes usually perform an operation on all datablocks pass 'all' to the data_block_
↳id argument
50 # By convention the operation name is the name of the node in lowercase letters
51 self.t.history_trace.add_operation(data_block_id='all', operation='derivative',
↳parameters=params)
52
53 # return the modified transmission instance, which is then the output of this node
54 return self.t

```

### 1.44.2 Complex node

For a more complex node with multiple inputs and/or outputs you will need to explicitly specify the terminals when instantiating the parent *CtrlNode* and create a simple override of the `process()` method.

Format of the dict specifying the node's terminals:

```

{
  <terminal name (str)>:      {'io': <'in' or 'out'>},
  <another terminal name (str)>: {'io', <'in' or 'out'>},
  <another terminal name (str)>: {'io', <'in' or 'out'>}
  ...
}

```

Override the `process()` method simply pass all kwargs to a `processData()` method and return the output. The `processData()` method must return a dict. This dict must have keys that correspond to the specified output terminals. The values of these keys are the outputs from the respective terminals.

Here is a trimmed down example from the *LDA* node:

```

1 class LDA(CtrlNode):
2     """Linear Discriminant Analysis, uses sklearn"""
3     nodeName = "LDA"
4     uiTemplate = [('train_data', 'list_widget', {'selection_mode': QtWidgets.
↳QAbstractItemView.ExtendedSelection,
5                                     'tooltip': 'Column containing the_
↳training data'})],
6                     ('train_labels', 'combo', {'tooltip': 'Column containing training labels'})
↳),
7                     ('solver', 'combo', {'items': ['svd', 'lsqr', 'eigen']}),
8                     ('shrinkage', 'combo', {'items': ['None', 'auto', 'value']}),

```

(continues on next page)

(continued from previous page)

```

9         ('shrinkage_val', 'doubleSpin', {'min': 0.0, 'max': 1.0, 'step': 0.1,
↪ 'value': 0.5}),
10         ('n_components', 'intSpin', {'min': 2, 'max': 1000, 'step': 1, 'value': 2}
↪),
11         ('tol', 'intSpin', {'min': -50, 'max': 0, 'step': 1, 'value': -4}),
12         ('score', 'lineEdit', {}),
13         ('predict_on', 'list_widget', {'selection_mode': QtWidgets.
↪QAbstractItemView.ExtendedSelection,
14                                     'toolTip': 'Data column of the input
↪"predict" Transmission\n'
15                                     'that is used for predicting_
↪from the model'}),
16         ('Apply', 'checkbox', {'applyBox': True, 'checked': False})
17     ]
18
19 def __init__(self, name, **kwargs):
20     # Specify the terminals with a dict
21     CtrlNode.__init__(self, name, terminals={'train': {'io': 'in'},
22                                             'predict': {'io': 'in'},
23
24                                             'T': {'io': 'out'},
25                                             'coef': {'io': 'out'},
26                                             'means': {'io': 'out'},
27                                             'predicted': {'io': 'out'}
28                                             },
29
30     **kwargs)
31     self.ctrls['score'].setReadOnly(True)
32
33 # Very simple override
34 def process(self, **kwargs):
35     return self.processData(**kwargs)
36
37 def processData(self, train: Transmission, predict: Transmission):
38     self.t = train.copy() #: Transmisison instance containing the training data with_
↪the labels
39     self.to_predict = predict.copy() #: Transmission instance containing the data to_
↪predict after fitting on the the training data
40
41     # function from mesmerize.analysis.utils
42     dcols, ccols, ucols = organize_dataframe_columns(self.t.df.columns)
43
44     # Set available options for training data & labels
45     self.ctrls['train_data'].setItems(dcols)
46     self.ctrls['train_labels'].setItems(ccols)
47
48     dcols = organize_dataframe_columns(self.to_predct.df.columns)
49     # Set available data column options for predicting on
50     self.ctrls['predict_on'].setItems(dcols)
51
52     # Process further only if Apply is checked
53     if not self.ctrls['Apply'].isChecked():
54         return

```

(continues on next page)

(continued from previous page)

```

54
55     # Get the user-set parameters
56     train_column = self.ctrls['train_data'].currentText()
57
58     # ... get other params
59     n_components = self.ctrls['n_components'].value()
60
61     # ... do stuff
62
63     # This node outputs separate transmissions that are all logged
64     self.t.history_trace.add_operation('all', 'lda', params)
65     self.t_coef.history_trace.add_operation('all', 'lda', params)
66     self.t_means.history_trace.add_operation('all', 'lda', params)
67
68     # the `to_predict` transmission is logged differently
69     self.to_predict.history_trace.add_operations('all', 'lda-predict', params_predict)
70
71     # dict for organizing this node's outputs
72     # The keys MUST be the same those specified for this node's output terminals
73     out = {'T': self.t,
74           'coef': self.t_coef,
75           'means': self.t_means,
76           'predicated': self.to_predict
77           }
78
79     return out

```

### 1.44.3 uiTemplate

Specify the uiTemplate attribute as a list of tuples.

One tuple per UI element with the following structure:

(<name (str)>, <type (str)>, <dict of attributes to set>)

Examples:

```

('dist_metric', 'combo', {'items': ['euclidean', 'wasserstein', 'bah'], 'toolTip':
↪ 'distance metric to use'})
('n_components', 'intSpin', {'min': 2, 'max': 10, 'value': 2, 'step': 1, 'toolTip':
↪ 'number of components'})
('data_columns', 'list_widget', {'selection_mode': QtWidgets.QAbstractItemView.
↪ ExtendedSelection})

```

The name can be anything. Accepted types and accepted attributes are outlined below

| widget type   | attributes that can be set                                                                                                                                                                        |
|---------------|---------------------------------------------------------------------------------------------------------------------------------------------------------------------------------------------------|
| intSpin       | <p><i>min (int)</i>: minimum value allowed in the spinbox</p> <p><i>max (int)</i>: maximum value allowed</p> <p><i>step (int)</i>: step size</p> <p><i>value (int)</i>: default value</p>         |
| doubleSpin    | <p><i>min (float)</i>: minimum value allowed in the spinbox</p> <p><i>max (float)</i>: maximum value allowed</p> <p><i>step (float)</i>: step size</p> <p><i>value (float)</i>: default value</p> |
| check         | <p><i>checked (bool)</i>: default state of the checkBox</p> <p><i>applyBox (bool)</i>: Whether this is an “Apply checkbox”</p>                                                                    |
| radioBtn      | <p><i>checked (bool)</i>: default state of this radioButton</p>                                                                                                                                   |
| combo         | <p><i>items (list)</i>: default list of items that will be set in the comboBox</p>                                                                                                                |
| list_widget   | <p><i>items (list)</i>: default list of items that will be set in the list_widget</p> <p><i>selection_mode</i>: One of the accepted <a href="#">QAbstractItemView selection modes</a></p>         |
| lineEdit      | <p><i>text (str)</i>: default text in the line edit</p> <p><i>placeholder (str)</i>: placeholder text</p> <p><i>readOnly (bool)</i>: set as read only</p>                                         |
| plainTextEdit | <p><i>text (str)</i>: default text in the text edit</p> <p><i>placeholder (str)</i>: placeholder text</p>                                                                                         |
| label         | <p><i>text (str)</i>: default text</p>                                                                                                                                                            |
| button        | <p><i>text (str)</i>: default text on the button</p> <p><i>checkable (bool)</i>: whether this button is checkable</p>                                                                             |
| color         | <p><i>Does not take any attributes</i></p>                                                                                                                                                        |

All UI widget types outlined above take `toolTip` as an attribute which can be used to display tooltips

## 1.45 Plots

The easiest way to create a plot module is by subclassing the *BasePlotWidget*. You could also subclass the abstract base if you need to define all the common functionality differently.

### 1.45.1 General Design

This shows how you can design a plot using the *SpaceMapPlot* as a simple example. It will generally consist of a class for the main plot area, plot control, and the plot window which contains the controls and plot area.

### 1.45.2 Plot Area

A class which holds the actual plot, could be a matplotlib widget or pyqtgraph plot widget for example. In the *SpaceMapPlot* this is simply a subclass of the pyqtgraph matplotlib widget with a few more attributes and a helper method. The *error\_label* attribute is simply a QLabel used for displaying a plot error summary and is handled by the *exceptions\_label* decorator from *qdialogs*.

### 1.45.3 Plot Controls

A class which manages the plot controls. Generally useful to use a QDockWidget for this and design the actual GUI layout using QtDesigner. The *WidgetRegistry* provides a simple way to package the plot control values (plot parameters) into a dict.

Register a widget to the registry using the *WidgetRegistry* instance's *register()* method. The **getter** method corresponds to the widget's method which will return the value of the widget (such as text or a number) that is set in the parameters dict which is created when *widget\_registry.get\_state()* is called. Correspondingly, **setter** method is the widget's method that is used to set a value to the widget and is used when saved plots are restored. In essence, **setter** and **getter** must be interoperable.

The Space Map plot uses a *sig\_changed* class attribute that simply emits when any of the widgets are changed. This is later used in the main plot window to update the plot.

A *fill\_widget()* method is useful for populating the controls in the dock widget when the input data to the plot window changes.

In the Space Map widget, *get\_state()* and *set\_state()* simply wrap the corresponding methods from the *WidgetRegistry* instance.

### 1.45.4 Plot Window

Subclass from QMainWindow and *BasePlotWidget*. **Mandatory** to specify a *drop\_opts* class attribute of type *list*. This list contains the name of any widgets in the dict return from the *WidgetRegistry* that should be excluded when saving the plot. This should be used if you are using data types that are not JSON serializable, however it is rarely necessary. Support for *drop\_opts* may be removed in the future.

In general specifying the methods described below should be sufficient to create a saveable plot. If you need finer control of the data structure for saving/opening plots you can subclass from the *abstract base class*.



## `__init__`

Setting things up, connection signals, etc. Useful to have a console dock widget.

## `set_update_live()`

A method that interacts with a “live update” checkbox in the plot controls.

## `set_input()`

Set the input transmission for this plot if it is in “live update” mode or if the plot instance is new (has not had input data previously).

Useful to have a *BasePlotWidget.signal\_blocker* decorator so that the plot doesn’t constantly update while the new data comes in, since it could cause plot options to change etc.

## `fill_control_widget()`

Organize the plot options that are available to the user and set the control widgets.

Useful to have a *BasePlotWidget.signal\_blocker* decorator here as well for same reasons as described above.

## `update_plot()`

This is the core of plot. Use the input transmission and the user-selected plot parameters to draw the plot in the plot area. Generally interacts with the Plot Area instance. You can use the *get\_state()* method of the control widget’s *WidgetRegistry* to conveniently get a dict of all the user-selected plot parameters.

Useful to have an *exceptions\_label* or *present\_exceptions* decorator from the *qdialogs module*. The *exceptions\_label* provides a less annoying way to present exceptions that occurred when updating the plot.

## `get_plot_opts()`

Usually just returns the dict from the widget registry containing all user-set plot parameters.

## `set_plot_opts()`

Usually just calls the widget registry’s *set\_state()* method to set the plot parameters from a dict.

Useful to have a *BasePlotWidget.signal\_blocker* decorator. In general you would use the *BasePlotWidget.open\_plot()* method to open a saved plot and it takes care of updating the plot after the input transmission and plot parameters are set.

## show\_exception\_info()

Called when the *exceptions\_label* is clicked. Opens a QMessageBox to show the entire stack trace.

## 1.46 Viewer Modules

Viewer modules appear as either QDockWidgets or QWidgets to the user. They must consist of a main ModuleGUI class which inherits from either QDockWidget or QWidget. They can utilize any additional python modules, classes, etc.

### 1.46.1 Instructions

1. Create a directory plugins directory if you don't have one. If you are using a snap installation this has to be within your home folder. Set this plugins directory in the *System Configuration*. This directory can contain as many custom modules as you want. All python modules within the plugins directory are automatically imported.
2. Download the `__init__.py` and place it within the plugins directory.
3. Create the main module file for your custom module. This file can be named as you wish and must use the struture outlined below. In addition to this main module file you can create a directory to house any other modules, files etc. You can create Qt templates using Qt Creator and convert them to .py template files using pyuic5 and use them for your custom module.

#### Basic Structure

```

1  from PyQt5 import QtWidgets
2
3  module_name = 'Example Module'
4
5  # You must define module_name.
6  # This is the name that will be displayed in the "Plugins" menu of the
   ↪ Viewer Window.
7  # You can use this to reference the ModuleGUI instance through the Viewer
   ↪ Console via ``get_module(<module_name>``
8
9
10 # The main GUI class MUST be named ModuleGUI.
11 # You can have other classes and more GUIs however ModuleGUI is the one
   ↪ that the Viewer Window directly calls.
12
13 class ModuleGUI(QtWidgets.QDockWidget):
14     # The Viewer MainWindow will pass its Viewer instance that can be used
   ↪ to interact with the viewer and work environment.
15     def __init__(self, parent, viewer_instance):
16         QtWidgets.QDockWidget.__init__(self, parent)
17         self.setFloating(True) # Must be floating

```

4. The module will be accessible through the Viewer Window's "Plugins" menu. The names in the plugins menu will correspond to the aforementioned `module_name` variable.

## 1.47 Common

`mesmerize.common.get_proj_config(proj_path: Optional[str] = None) → configparser.RawConfigParser`

**Parameters** `proj_path` – Full project path

`mesmerize.common.get_project_manager()`

Get the project manager for this Mesmerize instance

`mesmerize.common.get_sys_config() → dict`

Get the user-set system configuration

`mesmerize.common.get_window_manager()`

Get the Window Manager for this Mesmerize instance

### 1.47.1 Utils

#### Some frequently used utility functions

`mesmerize.common.utils.make_workdir(prefix: str = "") → str`

Make a workdir within the `mesmerize_tmp` directory of the workdir specified in the configuration. The name of the created workdir is the date & time of its creation. You can add a prefix to this name.

**Parameters** `prefix` – Prefix for the workdir name

**Returns** full workdir path

**Return type** `str`

`mesmerize.common.utils.make_runfile(module_path: str, savedir: str, args_str: Optional[str] = None, filename: Optional[str] = None, pre_run: Optional[str] = None, post_run: Optional[str] = None) → str`

Make an executable bash script. Used for running python scripts in external processes.

**Parameters**

- `module_path` (`str`) – absolute module path
- `args_str` (`str`) – str of args that is directly passed with the python command in the bash script
- `savedir` (`Optional[str]`) – working directory
- `filename` (`Optional[str]`) – optional, specific filename for the script
- `pre_run` (`Optional[str]`) – optional, str to run before module is ran
- `post_run` (`Optional[str]`) – optional, str to run after module has run

**Returns** path to the shell script that can be run

**Return type** `str`

`class mesmerize.common.utils.HdfTools`

Functions for saving and loading HDF5 data

`static save_dataframe(path: str, dataframe: pandas.core.frame.DataFrame, metadata: Optional[dict] = None, metadata_method: str = 'json', raise_meta_fail: bool = True)`

Save DataFrame to hdf5 file along with a meta data dict.

Meta data dict can either be serialized with json and stored as a str in the hdf5 file, or recursively saved into hdf5 groups if the dict contains types that hdf5 can deal with. Experiment with both methods and see what works best

Currently the hdf5 method can work with these types: [str, bytes, int, float, np.int, np.int8, np.int16, np.int32, np.int64, np.float, np.float16, np.float32, np.float64, np.float128, np.complex].

If it encounters an object that is not of these types it will store whatever that object's `__str__()` method returns if `on_meta_fail` is False, else it will raise an exception.

#### Parameters

- **path** (*str*) – path to save the file to
- **dataframe** (*pd.DataFrame*) – DataFrame to save in the hdf5 file
- **metadata** (*Optional[dict]*) – Any associated meta data to store along with the DataFrame in the hdf5 file
- **metadata\_method** (*str*) – method for storing the metadata dict, either 'json' or 'recursive'
- **raise\_meta\_fail** (*bool*) – raise an exception if recursive metadata saving encounters an unsupported object If false, it will save the unsupported object's `__str__()` return value

**static load\_dataframe**(*filepath: str*) → Tuple[pandas.core.frame.DataFrame, Optional[dict]]

Load a DataFrame along with meta data that were saved using `HdfTools.save_dataframe`

**Parameters** **filepath** (*str*) – file path to the hdf5 file

**Returns** tuple, (DataFrame, meta data dict if present else None)

**Return type** Tuple[pd.DataFrame, Union[dict, None]]

**static save\_dict**(*d: dict, filename: str, group: str, raise\_type\_fail=True*)

Recursively save a dict to an hdf5 group.

#### Parameters

- **d** (*dict*) – dict to save
- **filename** (*str*) – filename
- **group** (*str*) – group name to save the dict to
- **raise\_type\_fail** (*bool*) – whether to raise if saving a piece of data fails

**static load\_dict**(*filename: str, group: str*) → dict

Recursively load a dict from an hdf5 group.

#### Parameters

- **filename** (*str*) – filename
- **group** (*str*) – group name of the dict

**Returns** dict recursively loaded from the hdf5 group

**Return type** dict

`mesmerize.common.utils.draw_graph`(*l: List[dict], filename: Optional[str] = None, view: bool = False*) → str

Draw a graph from a list of dicts.

#### Parameters

- **l** (*List[dict]*) – list of dicts
- **filename** (*Optional[str]*) – full path for storing the draw graph pdf file

- **view** (*Optional*[*bool*]) – view the graph in the system’s default pdf reader after it is rendered

**Returns** full path to the graph pdf file

**Return type** *str*

## 1.47.2 QDialogs

### Decorators for Qt Dialog GUIs used throughout Mesmerize

`mesmerize.common.qdialogs.present_exceptions`(*title: str = 'error', msg: str = 'The following error occurred.'*)

Use to catch exceptions and present them to the user in a QMessageBox warning dialog. The traceback from the exception is also shown.

This decorator can be stacked on top of other decorators.

Example:

#### Parameters

- **title** – Title of the dialog box
- **msg** – Message to display above the traceback in the dialog box
- **help\_func** – A helper function which is called if the user clicked the “Help” button

`mesmerize.common.qdialogs.exceptions_label`(*label: str, exception\_holder: Optional[str] = None, title: str = 'error', msg: str = 'The following error occurred'*)

Use a label to display an exception instead of a QMessageBox

#### Parameters

- **label** – name of a QLabel instance
- **exception\_holder** – name of an exception\_holder attribute where the exception message is stored. This can be used to view the whole exception when the label is clicked on for example.
- **title** – title supplied for the QMessageBox (if used later)
- **msg** – message supplied for the QMessageBox (if used later)

`mesmerize.common.qdialogs.use_open_file_dialog`(*title: str = 'Choose file', start\_dir: Optional[str] = None, exts: Optional[List[str]] = None*)

Use to pass a file path, for opening, into the decorated function using QFileDialog.getOpenFileName

#### Parameters

- **title** – Title of the dialog box
- **start\_dir** – Directory that is first shown in the dialog box.
- **exts** – List of file extensions to set the filter in the dialog box

`mesmerize.common.qdialogs.use_save_file_dialog`(*title: str = 'Save file', start\_dir: Optional[str] = None, ext: Optional[str] = None*)

Use to pass a file path, for saving, into the decorated function using QFileDialog.getSaveFileName

#### Parameters

- **title** – Title of the dialog box
- **start\_dir** – Directory that is first shown in the dialog box.

- **exts** – List of file extensions to set the filter in the dialog box

`mesmerize.common.qdialogs.use_open_dir_dialog(title: str = 'Open directory', start_dir: Optional[str] = None)`

Use to pass a dir path, to open, into the decorated function using `QFileDialog.getExistingDirectory`

#### Parameters

- **title** – Title of the dialog box
- **start\_dir** – Directory that is first shown in the dialog box.

Example:

```
@use_open_dir_dialog('Select Project Directory', '')
def load_data(self, path, *args, **kwargs):
    my_func_to_do_stuff_and_load_data(path)
```

## 1.48 Viewer Core

### 1.48.1 Video Tutorial

### 1.48.2 ViewerWorkEnv

This objects stores the data that the *Viewer* interacts with.

```
class mesmerize.viewer.core.ViewerWorkEnv(imgdata:
    Optional[mesmerize.viewer.core.data_types.ImgData] =
    None, sample_id="", UUID=None, meta=None,
    stim_maps=None, roi_manager=None, roi_states=None,
    comments="", origin_file="", custom_cols=None,
    history_trace: Optional[list] = None, additional_data:
    Optional[dict] = None, misc: Optional[dict] = None,
    **kwargs)
```

#### **\_UUID**

UUID, if opened from a project Sample refers to the `ImgUUID`

```
__init__(imgdata: Optional[mesmerize.viewer.core.data_types.ImgData] = None, sample_id="",
    UUID=None, meta=None, stim_maps=None, roi_manager=None, roi_states=None, comments="",
    origin_file="", custom_cols=None, history_trace: Optional[list] = None, additional_data:
    Optional[dict] = None, misc: Optional[dict] = None, **kwargs)
```

A class that encapsulates the main work environment objects (img sequence, ROIs, and ROI associated curves) of the viewer. Allows for a work environment to be easily spawned from different types of sources and allows for a work environment to be easily saved in different ways regardless of the type of original data source.

#### Parameters

- **roi\_states** (*dict*) – roi states from ROI Manager module
- **stim\_maps** (*dict*) – {‘units’: str, ‘dataframe’: `pd.DataFrame`}
- **history\_trace** (*list*) – list of dicts containing a traceable history of what what done with the work environment, such as params used from modules to process the data

**\_\_weakref\_\_**

list of weak references to the object (if defined)

**static \_organize\_meta**(*meta: dict, origin: str*) → dict

Organize input meta data dict into a uniform structure :param meta: meta data dict, origin from a json file for example :param origin: name of the origin source of the meta data, such a program or microscope etc. :return: dict organized with keys that are used throughout Mesmerize.

**clear()**

Cleanup of the work environment

**classmethod from\_mesfile**(*mesfile\_object: mesmerize.viewer.core.mesfile.MES, img\_reference: str*)

Return instance of work environment with MesmerizeCore.ImgData class object using seq returned from MES.load\_img from MesmerizeCore.FileInput module and any stimulus map that the user may have specified.

**Parameters**

- **mesfile\_object** – MES object, created from .mes file
- **img\_reference** – image reference to load, see `mesmerize.viewer.core.mesfile.MES.get_image_references()`

**classmethod from\_pickle**(*pickle\_file\_path: str, tiff\_path: Optional[str] = None*)

Get pickled image data from a pickle file & image sequence from a npz or tiff. Used after motion correction & to view a sample from a project DataFrame. Create ImgData class object (See MesmerizeCore.DataTypes) and return instance of the work environment.

**Param** `pickle_file_path`: full path to the pickle containing image metadata, stim maps, and roi\_states

**Param** `tiff_path`: str of the full path to a tiff file containing the image sequence

**classmethod from\_tiff**(*path: str, method: str, meta\_path: Optional[str] = None, axes\_order: Optional[str] = None, meta\_format: Optional[str] = None*)

Return instance of work environment with `ImgData.seq` set from the tiff file.

**Parameters**

- **path** – path to the tiff file
- **method** – one of ‘imread’, ‘asarray’, or ‘asarray-multi’. Refers to usage of either `tiff-file.imread` or `tiff-file.asarray`. ‘asarray-multi’ will load multi-page tiff files.
- **meta\_path** – path to a file containing meta data
- **meta\_format** – meta data format, must correspond to the name of a function in `viewer.core.organize_meta`
- **axes\_order** – Axes order as a 3 or 4 letter string for 2D or 3D data respectively. Axes order is assumed to be “txy” or “tzxy” if not specified.

**history\_trace**

history log

**imgdata:** `mesmerize.viewer.core.data_types.ImgData`

ImgData instance

**isEmpty**

Return True if the work environment is empty

**static load\_mesfile**(*path: str*) → *mesmerize.viewer.core.mesfile.MES*

Just passes the path of a .mes file to the constructor of class MES in MesmerizeCore.FileInput. Loads .mes file & constructs MES obj from which individual images & their respective metadata can be loaded to construct viewer work environments using the classmethod viewerWorkEnv.from\_mesfile.

**Parameters path** – full path to a single .mes file.

**roi\_manager**

reference to the back-end ROI Manager that is currently in use

**sample\_id**

SampleID, if opened from a project Sample

**stim\_maps**

Stimulus maps

**to\_pandas**(*proj\_path: str, modify\_options: Optional[dict] = None*) → *list*

Used for saving the work environment as a project Sample.

**Parameters**

- **proj\_path** – Root path of the current project
- **modify\_options** –

**Returns** list of dicts that each correspond to a single curve that can be appended as rows to the project dataframe

**to\_pickle**(*dir\_path: str, filename: Optional[str] = None, save\_img\_seq=True, UUID=None*) → *str*

Package the current work Env ImgData class object (See MesmerizeCore.DataTypes) and any paramteres such as for motion correction and package them into a pickle & image seq array. Used for batch motion correction and for saving current sample to the project. Image sequence is saved as a tiff and other information about the image is saved in a pickle.

### 1.48.3 ImgData

**class** `mesmerize.viewer.core.data_types.ImgData`(*seq: Optional[numpy.ndarray] = None, meta: Optional[dict] = None*)

Object that stores the image sequence and meta data from the imaging source

**\_\_init\_\_**(*seq: Optional[numpy.ndarray] = None, meta: Optional[dict] = None*)

**Parameters**

- **seq** – Image sequence as a numpy array, shape is [x, y, t] or [x, y, t, z]
- **meta** – Meta data dict from the imaging source.

### 1.48.4 ViewerUtils

The *Viewer* is usually not interacted with directly from modules outside of the viewer (such as viewer modules. They instead use the ViewerUtils class which includes helper functions and a reference to the viewer.

**class** `mesmerize.viewer.core.ViewerUtils`(*viewer\_reference: <module 'mesmerize.pyqtgraphCore.imageview.ImageView' from '/home/docs/checkouts/readthedocs.org/user\_builds/mesmerize/envs/master/lib/python3.7.egg/mesmerize/pyqtgraphCore/imageview/ImageView.py'>*)

Some utility functions for interfacing viewer.core.ViewerWorkEnv with the pyqtgraphCore.ImageView widget



`__init__` (*viewer\_reference*: <module 'mesmerize.pyqtgraphCore.imageview.ImageView' from '/home/docs/checkouts/readthedocs.org/user\_builds/mesmerize/envs/master/lib/python3.7/site-packages/mesmerize-0.6.1-py3.7.egg/mesmerize/pyqtgraphCore/imageview/ImageView.py'>)

`_clear_workEnv` (*clear\_sample\_id*=False)  
 Cleanup of the ViewerWorkEnv and ImageView widget

`discard_workEnv` (*clear\_sample\_id*=False)  
 Ask the user if they want to discard their work environment. If Yes, calls `_clear_workEnv()`

`set_statusbar` (*msg*)  
 Set the status bar message in the viewer window.

**Parameters** *msg* – text to display in the status bar

`update_workEnv` ()  
 Update the ImageView widget with the ViewerWorkEnv

**viewer**  
 reference to the pyqtgraph ImageView widget instance (viewer)

**work\_env**  
 ViewerWorkEnv instance

### 1.48.5 Mesfile

**class** `mesmerize.viewer.core.mesfile.MES` (*filename*: *str*)  
 Handles of opening .mes files and organizing the images and meta data. The `load_img()` method returns a 3D array (dims are [time, cols, rows]) of the image sequence and its associated meta data.

Usage: Create a MES instance by passing the path of your mes file, example:

```
mesfile = MES('/path/to/mesfile/experiment_Feb_31.mes')
```

Call the `get_image_references()` method to get a list of references for images that can be loaded.

To load an image that is available in the instance, just pass one of the references from `get_image_references()` to the `load_img` method:

```
img_array, meta_dict = mesfile.load_img('IF0001_0001')
```

`__init__` (*filename*: *str*)

**Parameters** *filename* – full path of a single .mes file

`__weakref__`  
 list of weak references to the object (if defined)

`get_image_references` () → *list*  
 Get a list of all image references available in the instance

`load_img` (*img\_reference*: *str*) -> (<class 'numpy.ndarray'>, <class 'dict'>)

**Parameters** *img\_reference* – The image reference, usually something like IFxxxx\_xxxx or Ifxxxx\_xxxx

**Returns** (image sequence array, meta data dict)

## 1.48.6 Examples

These examples can be run in the *Viewer Console*.

### Working with meta data

```
# view meta data
>>> get_meta()

{'origin': 'AwesomeImager', 'version': '4107ff58a0c3d4d5d3c15c3d6a69f8798a20e3de', 'fps': 10.0, 'date': '20190426_152034', 'vmin': 323, 'vmax': 1529, 'orig_meta': {'source': 'AwesomeImager', 'version': '4107ff58a0c3d4d5d3c15c3d6a69f8798a20e3de', 'level_min': 323, 'stims': {}, 'time': '152034', 'date': '20190426', 'framerate': 10.0, 'level_max': 1529}}

# manually set meta data entries
>>> get_meta()['fps'] = 30.0
```

### Open image

Use the *Viewer Core API* to open any arbitrary image

This example loads an image stored using `numpy.save()`, but this is applicable to images stored in any format that can eventually be represented as a numpy array in python. For example, you could also load image files stored in HDF5 format and load the numpy array that represents your image sequence.

```
1 import numpy as np
2
3 # clear the viewer work environment
4 clear_workEnv()
5
6 a = np.load('/path_to_image.npy')
7
8 # check what the axes order is
9 a.shape
10
11 # (1000, 512, 512) # for example
12 # looks like this is in [t, x, y]
13 # this can be transposed so we get [x, y, t]
14 # ImgData takes either [x, y, t] or [x, y, t, z] axes order
15
16 # Define a meta data dict
17 meta = \
18     {
19         "origin":      "Tutorial example",
20         "fps":         10.0,
21         "date":        "20200629_171823",
22         "scanner_pos": [0, 1, 2, 3, 4, 5, 6]
23     }
24
25 # Create ImgData instance
26 imgdata = ImgData(a.T, meta) # use a.T to get [x, y, t]
```

(continues on next page)

(continued from previous page)

```

27
28 # Create a work environment instance
29 work_env = ViewerWorkEnv(imgdata)
30
31 # Set the current Viewer Work Environment from this new instance
32 vi.viewer.workEnv = work_env
33
34 # Update the viewer with the new work environment
35 # this MUST be run whenever you replace the viewer work environment (the previous line)
36 update_workEnv()

```

## Image data

Image sequences are simply numpy arrays. For example extract the image sequence between frame 1000 and 2000.

### See also:

[Numpy array indexing](#)

```

1 # Get the current image sequence
2 seq = get_image()
3
4 # Trim the image sequence
5 trim = seq[:, :, 1000:2000]
6
7 # Set the viewer work environment image sequence to the trim one
8 vi.viewer.workEnv.imgdata.seq = trim
9
10 # Update the GUI with the new work environment
11 update_workEnv()

```

## View analysis log

View the analysis log, such as batch manager processing history.

```

>>> get_workEnv().history_trace

[{'caiman_motion_correction': {'max_shifts_x': 32, 'max_shifts_y': 32, 'iters_rigid': 1,
↳ 'name_rigid': 'Does not matter', 'max_dev': 20, 'strides': 196, 'overlaps': 98,
↳ 'upsample': 4, 'name_elas': 'a1_t2', 'output_bit_depth': 'Do not convert', 'bord_px': 5}, {'cnmfe': {'Input': 'Current Work Environment', 'frate': 10.0, 'gSig': 10, 'bord_
↳ px': 5, 'min_corr': 0.9600000000000001, 'min_pnr': 10, 'min_SNR': 1, 'r_values_min': 0.
↳ 7, 'decay_time': 2, 'rf': 80, 'stride': 40, 'gnb': 8, 'nb_patch': 8, 'k': 8, 'name_
↳ corr_pnr': 'a8_t1', 'name_cnmfe': 'a1_t2', 'do_corr_pnr': False, 'do_cnmfe': True}}, {
↳ 'cnmfe': {'Input': 'Current Work Environment', 'frate': 10.0, 'gSig': 10, 'bord_px': 5,
↳ 'min_corr': 0.9600000000000001, 'min_pnr': 14, 'min_SNR': 1, 'r_values_min': 0.7,
↳ 'decay_time': 4, 'rf': 80, 'stride': 40, 'gnb': 8, 'nb_patch': 8, 'k': 8, 'name_corr_
↳ pnr': '', 'name_cnmfe': 'a1_t2', 'do_corr_pnr': False, 'do_cnmfe': True}}]

```

## Running scripts

You can use the *Script Editor* to run scripts in the Viewer console for automating tasks such as batch creation. It basically allows you to use the *viewer console* more conveniently with a text editor. The execution environment of the viewer console and script editor are identical.

Some example are provided for caiman modules and *stimulus mapping*.

## 1.49 Viewer Modules

### 1.49.1 Batch Manager

```
class mesmerize.viewer.modules.batch_manager.ModuleGUI(parent, run_batch: Optional[list] = None,
                                                       testing: bool = False)
```

GUI for the Batch Manager

```
__init__(parent, run_batch: Optional[list] = None, testing: bool = False)
```

Initialize self. See help(type(self)) for accurate signature.

```
add_item(module: str, input_workEnv: mesmerize.viewer.core.viewer_work_environment.ViewerWorkEnv,
         input_params: dict, name: str = "", info: dict = "") → uuid.UUID
```

Add an item to the currently open batch

#### Parameters

- **module** – The module to run from /batch\_run\_modules.
- **input\_workEnv** – Input workEnv that the module will use
- **input\_params** – Input params that the module will use. Depends on your subclass of BatchRunInterface.process() method
- **name** – A name for the batch item
- **info** – A dictionary with any metadata information to display in the scroll area label.

**Returns** UUID of the added item

```
del_item()
```

Delete the currently selected item from the batch and any corresponding dependents of the item's output

```
df
```

pandas.DataFrame that stores a "database" of information on the batch

```
get_item_index(u: Union[uuid.UUID, str]) → int
```

Get DataFrame index from UUID

**Parameters** **u** – UUID or str representing UUID

**Returns** numerical index of the DataFrame corresponding to the UUID

```
get_selected_items() → Tuple[List[int], List[uuid.UUID]]
```

Returns a list of numeric indices and uuids for the currently selected items

```
load_item_input(viewers: Union[mesmerize.viewer.main_window.MainWindow, collections.UserList], r:
                pandas.core.series.Series = None, UUID: uuid.UUID = None, *args)
```

Pass either the batch DataFrame row or UUID of the item of which to load the input into a viewer

#### Parameters

- **viewers** – ViewerWindow or list of ImageView

- **r** – Row of batch DataFrame corresponding to the selected item
- **UUID** – UUID of the item to load input from

**load\_item\_output** (*module: str, viewers: Union[mesmerize.viewer.main\_window.MainWindow, mesmerize.pyqtgraphCore.imageview.ImageView.ImageView, collections.UserList], UUID: uuid.UUID*)

Calls subclass of BatchRunInterface.show\_output()

**Parameters**

- **module** – The module name under /batch\_run\_modules that the batch item is from
- **viewers** – ViewerWindow, ImageView, or list of ViewerWindows
- **UUID** – UUID of the item to load output from

**process\_batch** (*start\_ix: Union[int, uuid.UUID] = 0, clear\_viewers=False*)

Process everything in the batch by calling subclass of BatchRunInterface.process() for all items in batch

**Parameters**

- **start\_ix** – Either DataFrame index (int) or UUID of the item to start from.
- **clear\_viewers** – Clear work environments in all viewers that are open

**show\_item\_info** (*s: PyQt5.QtWidgets.QListWidgetItem*)

Shows any info (such as the batch module’s params) in the meta-info label

## 1.49.2 Tiff Module

Uses the **tiff** package created by **Christoph Gohlke**: <https://pypi.org/project/tiff/>

Can be used with scripts within Mesmerize for loading tiff files without using the API of *Viewer Core*

**class** mesmerize.viewer.modules.tiff\_io.**ModuleGUI** (*parent, viewer\_reference*)

**check\_meta\_path**() → bool

check if a file exists with the same name and the meta data extension specified by the selected meta data format

**load** (*tiff\_path: str, method: str, axes\_order: Optional[str] = None, meta\_path: Optional[str] = None, meta\_format: Optional[str] = None*) →

*mesmerize.viewer.core.viewer\_work\_environment.ViewerWorkEnv*

Load a tiff file along with associated meta data

**Parameters**

- **tiff\_path** – path to the tiff file
- **meta\_path** – path to the json meta data file
- **method** – one of “asarray”, “asarray-multi”, or “imread” “asarray” and “asarray-multi” uses `tiffio.asarray()` “asarray-multi” is for multi-page tiffs “imread” uses `tiffio.imread()`
- **axes\_order** – axes order, examples: txy, xyt, tzy, xytz etc.
- **meta\_format** – name of function from `viewer.core.organize_meta` that should be used to organize the meta data.

### 1.49.3 Caiman Motion Correction

Front-end for [Caiman NoRMCorre](#) parameters entry

Can be used with scripts for adding batch items.

**See also:**

*User guide*

**class** `mesmerize.viewer.modules.caiman_motion_correction.ModuleGUI`(*parent, viewer\_reference*)

**get\_params**(*group\_params: bool = False*) → dict

Get a dict of the set parameters :return: parameters dict :rtype: dict

**add\_to\_batch\_elas\_corr**()

Add a batch item with the currently set parameters and the current work environment.

### 1.49.4 CNMF

Front-end for [Caiman CNMF](#) parameter entry

Can be used with scripts for adding batch items.

**See also:**

*User guide*

**class** `mesmerize.viewer.modules.cnmf.ModuleGUI`(*parent, viewer\_reference*)

**get\_params**(\*args, *group\_params: bool = False*) → dict

Get a dict of the set parameters. If the work environment was loaded from a motion correction batch item it put the `bord_px` in the dict. Doesn't use any arguments

**Returns** parameters dict

**Return type** dict

**add\_to\_batch**(*params: dict = None*) → `uuid.UUID`

Add a CNMF batch item with the currently set parameters and the current work environment.

### 1.49.5 CNMFE

Front-end for [Caiman CNMFE](#) parameter entry

Can be used with scripts for adding batch items.

**See also:**

*User guide*

**class** `mesmerize.viewer.modules.cnmfe.ModuleGUI`(*parent, viewer\_reference*)

**get\_params**(*item\_type: str, group\_params: bool = False*) → dict

Get a dict of the set parameters. If the work environment was loaded from a motion correction batch item it put the `bord_px` in the dict. Doesn't use any arguments

**Parameters** `item_type` – one of `corr_pnr` or `cnmfe`

**add\_to\_batch\_corr\_pnr**(*params: Optional[dict] = None*) → `uuid.UUID`

Add a Corr PNR batch item with the currently set parameters and the current work environment.

**add\_to\_batch\_cnmfe**(*params: Optional[dict] = None*) → `uuid.UUID`

Add a CNMFE batch item with the currently set parameters and the current work environment.

## 1.49.6 MESc Importer

MESc importer for exploring & importing image sequences from .mesc HDF5 files.

### ModuleGUI

`class mesmerize.viewer.modules.femtonics_mesc.ModuleGUI`(*parent, viewer\_ref*)

**mesc\_navigator**

instance of MEScNavigator

**plot\_widgets**

list of plot widgets

**set\_file**(*path: str, \*args*)

Create an h5py file handle from the .mesc file at the given path.

\*args are not used, its just there for compatibility with the decorator.

#### Parameters

- **path** (*str*) – path to the .mes file
- **args** – not used

**close\_file**(*\*args*)

Close the file handle

**Parameters** **args** – \*args not used, just there for compatibility with the decorator

**import\_recording**(*\*args*)

Imports the chosen recording into the Viewer Work Environment based on the user selected hpath from the list widgets

\*args not used, just there for compatibility with the decorator

### MEScNavigator

Takes care of navigating through the HDF5 data structure of the .mesc file.

`class mesmerize.viewer.modules.femtonics_mesc.MEScNavigator`(*parent, list\_widgets:*

*List[mesmerize.pyqtgraphCore.widgets.ListWidget.ListWidget]*)

**sig\_hpath\_changed:** `PyQt5.QtCore.pyqtSignal`

emitted every time the hdf path changes

**sig\_channel\_doubleclicked:** `PyQt5.QtCore.pyqtSignal`

emitted when a Channel or Curve item is double clicked

**path:** `str`

system path to the hdf5 file

**file:** `h5py._hl.files.File`  
h5py file handle

**session:** `str`  
currently selected MSession

**sessions:** `List[str]`  
list of MSession options available in current file

**listw\_sessions:** `mesmerize.pyqtgraphCore.widgets.ListWidget.ListWidget`  
ui list of MSession options

**unit:** `str`  
currently selected MUnit

**units:** `List[str]`  
list of MUnit options available in current MSession

**listw\_units:** `mesmerize.pyqtgraphCore.widgets.ListWidget.ListWidget`  
ui list of MUnit options

**channel:** `str`  
currently selected Channel

**channels:** `List[str]`  
list of Channel options available in current MUnit

**listw\_channels:** `mesmerize.pyqtgraphCore.widgets.ListWidget.ListWidget`  
ui list of Channel options

**set\_file\_path**(*path: str*)  
set the path to the .mesc file

**Parameters** **path** – path to the .mesc hdf5 file

**close\_file**()  
Close the h5py file handle that is currently open.

**set\_session**(*key: Union[str, PyQt5.QtWidgets.QListWidgetItem]*)  
Set the MSession option

**Parameters** **key** – a valid MSession

**Returns**

**set\_unit**(*key: Union[str, PyQt5.QtWidgets.QListWidgetItem]*)  
Set the MUnit option

**Parameters** **key** – a valid MUnit

**Returns**

**set\_channel**(*key: Union[str, PyQt5.QtWidgets.QListWidgetItem]*)  
Set a Channel or Curve option

**Parameters** **key** – a valid Channel or Curve

**Returns**

**get\_hpath**(*astype: type*) → `Union[str, list, dict]`  
get the current hdf path

**Parameters** **astype** – one of *str*, *list*, or *dict*

**Returns** the hdf path as the chosen data type



## 1.50 ROI Manager

### 1.50.1 Video Tutorial

### 1.50.2 ModuleGUI

The GUI QDockWidget that communicates with the *back-end managers*

**class** `mesmerize.viewer.modules.roi_manager.ModuleGUI`(*parent*, *viewer\_reference*)

The GUI front-end for the ROI Manager module

**\_\_init\_\_**(*parent*, *viewer\_reference*)

Instantiate attributes

**manager**

The back-end manager instance.

**eventFilter**(*QObject*, *QEvent*)

Set some keyboard shortcuts

**slot\_delete\_roi\_menu**()

Delete the currently selected ROI

**start\_backend**(*type\_str: str*)

Choose backend, one of the Manager classes in the managers module.

**start\_manual\_mode**()

Start in manual mode. Creates a new back-end manager instance (Uses ManagerManual)

**add\_manual\_roi**(*shape: str*)

Add a manual ROI. Just calls ManagerManual.add\_roi

**package\_for\_project**() → *dict*

Gets all the ROI states so that they can be packaged along with the rest of the work environment to be saved as a project Sample

**set\_all\_from\_states**(*states: dict*)

Set all the ROIs from a states dict. Instantiates the appropriate back-end Manager

**import\_from\_imagej**()

Import ROIs from ImageJ zip file

### 1.50.3 Managers

The back-end managers that are used by the *ROI Manager ModuleGUI*

The managers hold instances of *ROIs* in an instance of *ROIList*

## AbstractBaseManager

Subclass this if you want to make your own Manager Back-end.

```
class mesmerize.viewer.modules.roi_manager_modules.managers.AbstractBaseManager(parent, ui,
                                                                              viewer_interface:
                                                                              mesmer-
                                                                              ize.viewer.core.common.ViewerUtils)
```

Base ROI Manager

```
__init__(parent, ui, viewer_interface: mesmerize.viewer.core.common.ViewerUtils)
    Set the common attributes
```

### Parameters

- **parent** – The ModuleGUI QDockWidget instance
- **ui** – The ui of the ModuleGUI QDockWidget instance,
- **viewer\_interface** – A ViewerUtils instance for accessing the Viewer the parent QDockWidget belongs to

### roi\_list

The ROIList instance that stores the list of ROIs

```
abstract add_roi(*args, **kwargs)
    Method for adding an ROI, must be implemented in subclass
```

```
is_empty() → bool
    Return true if the ROI list is empty, else return False
```

```
get_all_states() → dict
    Get the ROI states for all ROIs in self.roi_list so that they can be restored. The appropriate manager is
    instantiated based on the 'roi_type' key of the returned dict
```

```
get_plot_item() → mesmerize.pyqtgraphCore.graphicsItems.PlotDataItem.PlotDataItem
    Get the viewer plot item that is associated to these ROIs
```

```
clear()
    Cleanup of all ROIs in the list
```

```
__del__()
    Cleanup of all ROIs in the list and deletes the manager instance. Used when switching modes.
```

```
__weakref__
    list of weak references to the object (if defined)
```

## ManagerManual

```
class mesmerize.viewer.modules.roi_manager_modules.managers.ManagerManual(parent, ui,
                                                                              viewer_interface)
```

Bases: *mesmerize.viewer.modules.roi\_manager\_modules.managers.AbstractBaseManager*

The Manager for the Manual mode

```
__init__(parent, ui, viewer_interface)
    Set the common attributes
```

### Parameters

- **parent** – The ModuleGUI QDockWidget instance
- **ui** – The ui of the ModuleGUI QDockWidget instance,

- **viewer\_interface** – A ViewerUtils instance for accessing the Viewer the parent QDockWidget belongs to

**create\_roi\_list()**

Create a new empty ROI list instance for storing Manual ROIs

**add\_roi**(*shape: str*) → *mesmerize.viewer.modules.roi\_manager\_modules.roi\_types.ManualROI*

Add an ROI to the list

**Parameters** **shape** – either “PolyLineROI” or “EllipseROI”

**restore\_from\_states**(*states: dict*)

Restore ROIs from states

**get\_all\_states**() → *dict*

Get the ROI states so that they can be restored later

**import\_from\_imagej**(*path: str*)

Uses read-roi package created by Hadrien Mary. <https://pypi.org/project/read-roi/>

**Parameters** **path** – Full path to the ImageJ ROIs zip file

## ManagerScatterROI

**class** *mesmerize.viewer.modules.roi\_manager\_modules.managers*.**ManagerScatterROI**(*parent, ui,*

*viewer\_interface:*

*mesmer-*

*ize.viewer.core.common.ViewerU*

Bases: *mesmerize.viewer.modules.roi\_manager\_modules.managers.AbstractBaseManager*

Manager for unmoveable ROIs drawn using scatterplots

**\_\_init\_\_**(*parent, ui, viewer\_interface: mesmerize.viewer.core.common.ViewerUtils*)

Set the common attributes

### Parameters

- **parent** – The ModuleGUI QDockWidget instance
- **ui** – The ui of the ModuleGUI QDockWidget instance,
- **viewer\_interface** – A ViewerUtils instance for accessing the Viewer the parent QDockWidget belongs to

**add\_roi**(*curve: numpy.ndarray, xs: numpy.ndarray, ys: numpy.ndarray, metadata: Optional[dict] = None,*

*dfof\_data: Optional[numpy.ndarray] = None, spike\_data: Optional[numpy.ndarray] = None*) →

*mesmerize.viewer.modules.roi\_manager\_modules.roi\_types.ScatterROI*

Add a single ROI

*xs* and *ys* arguments are 1D numpy arrays.

### Parameters

- **curve** – curve data, 1-D array, y values/intensity values
- **xs** – x-values for the scatter plot to spatially illustrate the ROI
- **ys** – corresponding y-values for the scatter plot to spatially illustrate the ROI
- **metadata** – Any metadata for this ROI

**Returns** ScatterROI object

**restore\_from\_states**(*states: dict*)

Restore from states, such as when these ROIs are saved with a Project Sample

**create\_roi\_list**()

Create empty ROI List

**set\_spot\_size**(*size: int*)

Set the spot size for the scatter plot which illustrates the ROI

## ManagerVolROI

```
class mesmerize.viewer.modules.roi_manager_modules.managers.ManagerVolROI(parent, ui,
                                                                           viewer_interface:
                                                                           mesmer-
                                                                           ize.viewer.core.common.ViewerUtils)
```

Bases: *mesmerize.viewer.modules.roi\_manager\_modules.managers.ManagerScatterROI*

Manager for 3D ROIs

**\_\_init\_\_**(*parent, ui, viewer\_interface: mesmerize.viewer.core.common.ViewerUtils*)

Set the common attributes

### Parameters

- **parent** – The ModuleGUI QDockWidget instance
- **ui** – The ui of the ModuleGUI QDockWidget instance,
- **viewer\_interface** – A ViewerUtils instance for accessing the Viewer the parent QDock-Widget belongs to

**set\_zlevel**(*z: int*)

Set the current z-level to be visible in the viewer

**create\_roi\_list**()

Create new empty ROI list

## ManagerVolCNMF

```
class mesmerize.viewer.modules.roi_manager_modules.managers.ManagerVolCNMF(parent, ui,
                                                                           viewer_interface)
```

Bases: *mesmerize.viewer.modules.roi\_manager\_modules.managers.ManagerVolROI*

Manager for 3D CNMF based ROIs

**\_\_init\_\_**(*parent, ui, viewer\_interface*)

Set the common attributes

### Parameters

- **parent** – The ModuleGUI QDockWidget instance
- **ui** – The ui of the ModuleGUI QDockWidget instance,
- **viewer\_interface** – A ViewerUtils instance for accessing the Viewer the parent QDock-Widget belongs to

**create\_roi\_list**()

Create new empty ROI list

**add\_all\_components**(*cnmf\_data\_dict: dict, input\_params\_dict: dict*)

Add all components from a CNMF(E) output. Arguments correspond to CNMF(E) outputs

**Parameters**

- **cnmf\_data\_dict** – CNMF results data directly from the HDF5 file
- **input\_params\_dict** – dict of input params, from the batch manager
- **calc\_raw\_min\_max** – Calculate raw min & max for each ROI

**Returns**

**add\_roi()**

Not implemented, uses `add_all_components` to import all ROIs instead

**restore\_from\_states**(*states: dict*)

Restore from states, such as when these ROIs are saved with a Project Sample

**get\_all\_states**() → *dict*

Get all states so that they can be restored

**update\_idx\_components**(*ix: int*)

Update `idx_components` if the user manually delete an ROI

**set\_spot\_size**(*size: int*)

Set the spot size for the scatter plot which illustrates the ROI

**ManagerCNMFROI**

`class mesmerize.viewer.modules.roi_manager_modules.managers.ManagerCNMFROI`(*parent, ui, viewer\_interface*)

Bases: `mesmerize.viewer.modules.roi_manager_modules.managers.AbstractBaseManager`

Manager for ROIs imported from CNMF or CNMFE outputs

`__init__`(*parent, ui, viewer\_interface*)

Instantiate necessary attributes

`create_roi_list`()

Create empty CNMFROI list

`add_all_components`(*cnmf\_data\_dict, input\_params\_dict, calc\_raw\_min\_max=False*)

Add all components from a CNMF(E) output. Arguments correspond to CNMF(E) outputs

**Parameters**

- **cnmf\_data\_dict** – CNMF results data directly from the HDF5 file
- **input\_params\_dict** – dict of input params, from the batch manager
- **calc\_raw\_min\_max** – Calculate raw min & max for each ROI

**Returns**

**add\_roi()**

Not implemented, uses `add_all_components` to import all ROIs instead

**restore\_from\_states**(*states: dict*)

Restore from states, such as when these ROIs are saved with a Project Sample

**get\_all\_states**() → *dict*

Get all states so that they can be restored

**update\_idx\_components**(*ix: int*)

Update `idx_components` if the user manually delete an ROI

## 1.50.4 ROI List

Used for holding instance of *ROIs*

```
class mesmerize.viewer.modules.roi_manager_modules.roi_list.ROIList(ui, roi_types: type,  
viewer_interface: mesmerize.viewer.core.common.ViewerUtils)
```

A list for holding ROIs of one type

```
__init__(ui, roi_types: type, viewer_interface: mesmerize.viewer.core.common.ViewerUtils)  
    Instantiate
```

### Parameters

- **ui** – The ui from the parent ModuleGUI, used to interact with the ROI list widget etc.
- **roi\_types** – The type of ROI that this list will hold
- **viewer\_interface** – ViewerUtils instance for interacting with the parent Viewer

```
list_widget  
    ROI list widget
```

```
list_widget_tags  
    Tags list widget
```

```
vi  
    ViewrUtils instance
```

```
current_index  
    Current index (int)
```

```
previous_index  
    Previous index (int)
```

```
append(roi: Union[mesmerize.viewer.modules.roi_manager_modules.roi_types.ScatterROI,  
mesmerize.viewer.modules.roi_manager_modules.roi_types.ManualROI,  
mesmerize.viewer.modules.roi_manager_modules.roi_types.VolMultiCNMFROI], add_to_list_widget:  
bool = True)  
    Add an ROI instance to the list
```

```
clear_()  
    Cleanup of the list
```

```
__delitem__(key)  
    Delete an ROI from the list and cleanup from the viewer, reindex the colors etc.
```

```
disconnect_all()  
    Disconnect signals from the parent GUI
```

```
_reindex_list_widget()  
    Reindex ROI list
```

```
reindex_colormap(random_shuffle=False)  
    Reindex the colors so they sequentially follow the HSV colormap
```

```
__getitem__(item) → Union[mesmerize.viewer.modules.roi_manager_modules.roi_types.ManualROI,  
mesmerize.viewer.modules.roi_manager_modules.roi_types.ScatterROI]  
    Get an item (ROI) from the list
```

```
set_current_index(ix: int)  
    Set the current index
```

**highlight\_roi**(*roi: Union[mesmerize.viewer.modules.roi\_manager\_modules.roi\_types.ManualROI, mesmerize.viewer.modules.roi\_manager\_modules.roi\_types.ScatterROI]*)

Highlight an ROI in white, both the spatial visualization and the curve

**highlight\_curve**(*ix: int*)

Highlight the curve corresponding to the ROI at the passed index

**set\_previous\_index**()

Set the previous\_index attribute

**slot\_show\_all\_checkbox\_clicked**(*b: bool*)

Show all ROIs in the viewer overlay visualization and curves

**\_show\_graphics\_object**(*ix: int*)

Show the ROI at the passed index in the viewer overlay visualization

**\_hide\_graphics\_object**(*ix: int*)

Hide the ROI at the passed index in the viewer overlay visualization

**\_show\_all\_graphics\_objects**()

Show all ROIs in the viewer overlay visualization

**\_hide\_all\_graphics\_objects**()

Hide all ROIs in the viewer overlay visualization

**plot\_manual\_roi\_regions**()

Plot the ROI curves from the regions of all ManualROI instances in the list

**set\_pg\_roi\_plot**(*ix: int*)

Plot the ROI curve from the region of the ManualROI instance at the passed index

**set\_list\_widget\_tags**()

Set the tags list for the ROI at the current index

**update\_roi\_defs\_from\_configuration**()

Update ROI\_DEFS in the Tags list from the project configuration

**\_\_weakref\_\_**

list of weak references to the object (if defined)

## 1.50.5 ROI Types

A list of these are held by an instance of *ROIList*

### AbstractBaseROI

```
class mesmerize.viewer.modules.roi_manager_modules.roi_types._AbstractBaseROI(curve_plot_item:
    mesmerize.pyqtgraphCore.graphicsItems
    view_box:
    mesmerize.pyqtgraphCore.graphicsItems
    state: Optional[dict])
```

Abstract base class defining an ROI that works with the ROIList and ROI Managers. Inherit from this or BaseROI to make a new ROI class

**abstract** `__init__(curve_plot_item: mesmerize.pyqtgraphCore.graphicsItems.PlotDataItem.PlotDataItem, view_box: mesmerize.pyqtgraphCore.graphicsItems.ViewBox.ViewBox, state: Optional[dict])`

Minimum required attributes

#### Parameters

- **curve\_plot\_item** – The plot item that is used for display the curves in the viewer
- **view\_box** – ViewBox containing the image sequence, used for overlaying the ROIs on top of the image
- **state** – ROI state, used for restoring the ROIs. Pass None is not restoring an ROI from a state dict

**abstract** `get_roi_graphics_object() → PyQt5.QtWidgets.QGraphicsObject`  
Get the QGraphicsObject used for visualization of the spatial localization of the ROI

**abstract** `set_roi_graphics_object(*args, **kwargs)`  
Set the QGraphicsObject used for visualization of the spatial localization of the ROI

**abstract** `reset_color()`  
Reset the color of this ROI back to the original color

**abstract** `set_original_color(color)`  
Set the original color for this ROI

**Parameters** **color** – 1D numpy array of 4 floating point numbers (range 0 - 255) in RBGA format, [R, G, B, A]

**abstract** `get_color() → numpy.ndarray`  
Get the current color of this ROI

**Returns** 1D numpy array of 4 floating point numbers (range 0 - 255) in RBGA format, [R, G, B, A]

**Return type** np.ndarray

**abstract** `set_color(color, *args, **kwargs)`  
Set the current color of this ROI

**Parameters** **color** – 1D numpy array of 4 floating point numbers (range 0 - 255) in RBGA format, [R, G, B, A]

**abstract** `set_text(text: str)`  
Not implemented

**abstract** `set_tag(roi_def: str, tag: str)`  
Set a tag for the passed roi\_def

#### Parameters

- **roi\_def** – The ROI\_DEF that should be tagged
- **tag** – The tag to label for the passed ROI\_DEF/ROI Type

**abstract** `get_tag(roi_def) → str`  
Get the tag that is set to the passed 'roi\_def'

**Return type** str

**abstract** `get_all_tags() → dict`  
Get all the tags for all the ROI\_DEFS



Return type `dict`

**abstract add\_to\_viewer()**

Add this ROI to the viewer.

**abstract remove\_from\_viewer()**

Remove this ROI from the viewer

**abstract to\_state()**

Get the current state for this ROI so that it can be restored later

**abstract classmethod from\_state**(*curve\_plot\_item: mesmerize.pyqtgraphCore.graphicsItems.PlotDataItem.PlotDataItem*,  
*view\_box: mesmerize.pyqtgraphCore.graphicsItems.ViewBox.ViewBox.ViewBox*, *state: dict*)

Restore this ROI from a state

#### Parameters

- **curve\_plot\_item** – The plot item that is used for display the curves in the viewer
- **view\_box** – `ViewBox` containing the image sequence, used for overlaying the ROIs on top of the image
- **state** – ROI state, used for restoring the ROIs. Pass `None` is not restoring an ROI from a state dict

**\_\_weakref\_\_**

list of weak references to the object (if defined)

## BaseROI

Subclass from this if you want to make your own ROI Type.

```
class mesmerize.viewer.modules.roi_manager_modules.roi_types.BaseROI(curve_plot_item: mesmerize.pyqtgraphCore.graphicsItems.PlotDataItem.PlotDataItem,  
view_box: mesmerize.pyqtgraphCore.graphicsItems.ViewBox.ViewBox.ViewBox,  
state: Optional[dict] = None, metadata: Optional[dict] = None)
```

Bases: `mesmerize.viewer.modules.roi_manager_modules.roi_types._AbstractBaseROI`

A base class that is used by `ManualROI` and `CNMFEROI` Inherit from this to make a new ROI class

```
__init__(curve_plot_item: mesmerize.pyqtgraphCore.graphicsItems.PlotDataItem.PlotDataItem, view_box: mesmerize.pyqtgraphCore.graphicsItems.ViewBox.ViewBox.ViewBox, state: Optional[dict] = None, metadata: Optional[dict] = None)
```

Instantiate common attributes

#### Parameters

- **curve\_plot\_item** – The plot item that is used for display the curves in the viewer
- **view\_box** – `ViewBox` containing the image sequence, used for overlaying the ROIs on top of the image
- **state** – ROI state, used for restoring the ROIs. Pass `None` is not restoring an ROI from a state dict

**get\_roi\_graphics\_object()** → `PyQt5.QtWidgets.QGraphicsObject`  
 Get the `QGraphicsObject` used for visualization of the spatial localization of the ROI

**set\_roi\_graphics\_object(\*args, \*\*kwargs)**  
 Set the `QGraphicsObject` used for visualization of the spatial localization of the ROI

**reset\_color()**  
 Reset the color of this ROI back to the original color

**set\_original\_color(color)**  
 Set the original color for this ROI

**Parameters** `color` – 1D numpy array of 4 floating point numbers (range 0 - 255) in RGBA format, [R, G, B, A]

**get\_color()**  
 Get the current color of this ROI

**Returns** 1D numpy array of 4 floating point numbers (range 0 - 255) in RGBA format, [R, G, B, A]

**Return type** `np.ndarray`

**set\_color(color: Union[numpy.ndarray, str], \*args, \*\*kwargs)**  
 Set the current color of this ROI

**Parameters** `color` – 1D numpy array of 4 floating point numbers (range 0 - 255) in RGBA format, [R, G, B, A]

**set\_text(text: str)**  
 Not implemented

**set\_tag(roi\_def: str, tag: str)**  
 Set a tag for the passed `roi_def`

**Parameters**

- `roi_def` – The `ROI_DEF` that should be tagged
- `tag` – The tag to label for the passed `ROI_DEF/ROI` Type

**get\_tag(roi\_def) → str**  
 Get the tag that is set to the passed ‘`roi_def`’

**Return type** `str`

**get\_all\_tags() → dict**  
 Get all the tags for all the `ROI_DEFS`

**Return type** `dict`

**add\_to\_viewer()**  
 Add this ROI to the viewer.

**remove\_from\_viewer()**  
 Remove this ROI from the viewer

**to\_state()**  
 Must be implemented in subclass

**classmethod from\_state(curve\_plot\_item: mesmerize.pyqtgraphCore.graphicsItems.PlotDataItem.PlotDataItem, view\_box: mesmerize.pyqtgraphCore.graphicsItems.ViewBox.ViewBox, state: dict)**  
 Restore this ROI from a state

### Parameters

- **curve\_plot\_item** – The plot item that is used for display the curves in the viewer
- **view\_box** – ViewBox containing the image sequence, used for overlaying the ROIs on top of the image
- **state** – ROI state, used for restoring the ROIs. Pass None is not restoring an ROI from a state dict

### ManualROI

```
class mesmerize.viewer.modules.roi_manager_modules.roi_types.ManualROI(curve_plot_item:
                                                                    mesmer-
                                                                    ize.pyqtgraphCore.graphicsItems.PlotData
                                                                    roi_graphics_object:
                                                                    mesmer-
                                                                    ize.pyqtgraphCore.graphicsItems.ROI.ROI
                                                                    view_box: mesmer-
                                                                    ize.pyqtgraphCore.graphicsItems.ViewBox
                                                                    state: Optional[dict] =
                                                                    None, spike_data: Op-
                                                                    tional[numpy.ndarray]
                                                                    = None, dfof_data: Op-
                                                                    tional[numpy.ndarray]
                                                                    = None)
```

Bases: *mesmerize.viewer.modules.roi\_manager\_modules.roi\_types.BaseROI*

A class manually drawn ROIs

```
__init__(curve_plot_item: mesmerize.pyqtgraphCore.graphicsItems.PlotDataItem.PlotDataItem,
          roi_graphics_object: mesmerize.pyqtgraphCore.graphicsItems.ROI.ROI, view_box:
          mesmerize.pyqtgraphCore.graphicsItems.ViewBox.ViewBox.ViewBox, state: Optional[dict] =
          None, spike_data: Optional[numpy.ndarray] = None, dfof_data: Optional[numpy.ndarray] =
          None)
```

**property curve\_data:** tuple

tuple of (xs, ys)

**Type** return

**get\_roi\_graphics\_object**() → *mesmerize.pyqtgraphCore.graphicsItems.ROI.ROI*  
 Get the QGraphicsObject used for visualization of the spatial localization of the ROI

**set\_roi\_graphics\_object**(*graphics\_object: mesmerize.pyqtgraphCore.graphicsItems.ROI.ROI*)  
 Set the QGraphicsObject used for visualization of the spatial localization of the ROI

**to\_state**()  
 Must be implemented in subclass

**classmethod from\_state**(*curve\_plot\_item:*
*mesmerize.pyqtgraphCore.graphicsItems.PlotDataItem.PlotDataItem, view\_box:*
*mesmerize.pyqtgraphCore.graphicsItems.ViewBox.ViewBox.ViewBox, state:*
*dict*)  
 Restore this ROI from a state

### Parameters

- **curve\_plot\_item** – The plot item that is used for display the curves in the viewer
- **view\_box** – VBox containing the image sequence, used for overlaying the ROIs on top of the image
- **state** – ROI state, used for restoring the ROIs. Pass None is not restoring an ROI from a state dict

**reset\_color()**

Reset the color of this ROI back to the original color

**set\_original\_color(*color*)**

Set the original color for this ROI

**Parameters** **color** – 1D numpy array of 4 floating point numbers (range 0 - 255) in RBGA format, [R, G, B, A]

**get\_color()**

Get the current color of this ROI

**Returns** 1D numpy array of 4 floating point numbers (range 0 - 255) in RBGA format, [R, G, B, A]

**Return type** np.ndarray

**set\_color(*color: Union[numpy.ndarray, str], \*args, \*\*kwargs*)**

Set the current color of this ROI

**Parameters** **color** – 1D numpy array of 4 floating point numbers (range 0 - 255) in RBGA format, [R, G, B, A]

**set\_text(*text: str*)**

Not implemented

**set\_tag(*roi\_def: str, tag: str*)**

Set a tag for the passed roi\_def

**Parameters**

- **roi\_def** – The ROI\_DEF that should be tagged
- **tag** – The tag to label for the passed ROI\_DEF/ROI Type

**get\_tag(*roi\_def*) → str**

Get the tag that is set to the passed 'roi\_def'

**Return type** str

**get\_all\_tags() → dict**

Get all the tags for all the ROI\_DEFS

**Return type** dict

**add\_to\_viewer()**

Add this ROI to the viewer.

**remove\_from\_viewer()**

Remove this ROI from the viewer

## ScatterROI

```
class mesmerize.viewer.modules.roi_manager_modules.roi_types.ScatterROI(curve_plot_item:
    mesmerize.pyqtgraphCore.graphicsItems.PlotData
    view_box: mesmerize.pyqtgraphCore.graphicsItems.ViewBox
    state: Optional[dict]
    = None, curve_data:
    Optional[numpy.ndarray]
    = None, xs: Op-
    tional[numpy.ndarray]
    = None, ys: Op-
    tional[numpy.ndarray]
    = None, metadata:
    Optional[dict] =
    None, spike_data: Op-
    tional[numpy.ndarray]
    = None, dfof_data:
    Op-
    tional[numpy.ndarray]
    = None, **kwargs)
```

Bases: `mesmerize.viewer.modules.roi_manager_modules.roi_types.BaseROI`

A class for unmoveable ROIs drawn using scatter points

```
__init__(curve_plot_item: mesmerize.pyqtgraphCore.graphicsItems.PlotDataItem.PlotDataItem, view_box:
    mesmerize.pyqtgraphCore.graphicsItems.ViewBox.ViewBox.ViewBox, state: Optional[dict] =
    None, curve_data: Optional[numpy.ndarray] = None, xs: Optional[numpy.ndarray] = None, ys:
    Optional[numpy.ndarray] = None, metadata: Optional[dict] = None, spike_data:
    Optional[numpy.ndarray] = None, dfof_data: Optional[numpy.ndarray] = None, **kwargs)
```

### Parameters

- **curve\_plot\_item** –
- **view\_box** –
- **state** –
- **curve\_data** – 1D numpy array of y values
- **kwargs** –

```
set_curve_data(y_vals: numpy.ndarray, set_plot: bool = True)
    Set the curve data
```

```
to_state() → dict
    Must be implemented in subclass
```

```
set_roi_graphics_object(xs: numpy.ndarray, ys: numpy.ndarray)
    Set the QGraphicsObject used for visualization of the spatial localization of the ROI
```

```
get_roi_graphics_object() → mesmerize.pyqtgraphCore.graphicsItems.ScatterPlotItem.ScatterPlotItem
    Get the QGraphicsObject used for visualization of the spatial localization of the ROI
```

**classmethod from\_state**(*curve\_plot\_item*:  
*mesmerize.pyqtgraphCore.graphicsItems.PlotDataItem.PlotDataItem*, *view\_box*:  
*mesmerize.pyqtgraphCore.graphicsItems.ViewBox.ViewBox.ViewBox*, *state*:  
*dict*, *\*\*kwargs*)

Restore this ROI from a state

#### Parameters

- **curve\_plot\_item** – The plot item that is used for display the curves in the viewer
- **view\_box** – ViewBox containing the image sequence, used for overlaying the ROIs on top of the image
- **state** – ROI state, used for restoring the ROIs. Pass None is not restoring an ROI from a state dict

**reset\_color**()

Reset the color of this ROI back to the original color

**set\_original\_color**(*color*)

Set the original color for this ROI

**Parameters** **color** – 1D numpy array of 4 floating point numbers (range 0 - 255) in RBGA format, [R, G, B, A]

**get\_color**()

Get the current color of this ROI

**Returns** 1D numpy array of 4 floating point numbers (range 0 - 255) in RBGA format, [R, G, B, A]

**Return type** np.ndarray

**set\_color**(*color*: *Union[numpy.ndarray, str]*, *\*args*, *\*\*kwargs*)

Set the current color of this ROI

**Parameters** **color** – 1D numpy array of 4 floating point numbers (range 0 - 255) in RBGA format, [R, G, B, A]

**set\_text**(*text*: *str*)

Not implemented

**set\_tag**(*roi\_def*: *str*, *tag*: *str*)

Set a tag for the passed roi\_def

#### Parameters

- **roi\_def** – The ROI\_DEF that should be tagged
- **tag** – The tag to label for the passed ROI\_DEF/ROI Type

**get\_tag**(*roi\_def*) → *str*

Get the tag that is set to the passed 'roi\_def'

**Return type** *str*

**get\_all\_tags**() → *dict*

Get all the tags for all the ROI\_DEFS

**Return type** *dict*

**add\_to\_viewer**()

Add this ROI to the viewer.

**remove\_from\_viewer()**  
 Remove this ROI from the viewer

## VoICNMF

```
class mesmerize.viewer.modules.roi_manager_modules.roi_types.VoICNMF(
    curve_plot_item: mesmerize.pyqtgraphCore.graphicsItems.PlotDataItem,
    view_box: mesmerize.pyqtgraphCore.graphicsItems.ViewBox.ViewBox,
    cnmf_idx: Optional[int] = None,
    curve_data: Optional[numpy.ndarray] = None,
    contour: Optional[dict] = None,
    state: Optional[dict] = None,
    spike_data: Optional[numpy.ndarray] = None,
    dfof_data: Optional[numpy.ndarray] = None,
    metadata: Optional[dict] = None,
    zlevel: int = 0)

```

Bases: *mesmerize.viewer.modules.roi\_manager\_modules.roi\_types.ScatterROI*

3D ROI for CNMF data

```
__init__(curve_plot_item: mesmerize.pyqtgraphCore.graphicsItems.PlotDataItem.PlotDataItem,
    view_box: mesmerize.pyqtgraphCore.graphicsItems.ViewBox.ViewBox.ViewBox,
    cnmf_idx: Optional[int] = None,
    curve_data: Optional[numpy.ndarray] = None,
    contour: Optional[dict] = None,
    state: Optional[dict] = None,
    spike_data: Optional[numpy.ndarray] = None,
    dfof_data: Optional[numpy.ndarray] = None,
    metadata: Optional[dict] = None,
    zlevel: int = 0)

```

### Parameters

- **curve\_plot\_item** –
- **view\_box** –
- **state** –
- **curve\_data** – 1D numpy array of y values
- **kwargs** –

**to\_state()** → *dict*  
 Must be implemented in subclass

**set\_roi\_graphics\_object()**  
 Set the QGraphicsObject used for visualization of the spatial localization of the ROI

**set\_zlevel(z: int)**  
 Set the z-level of the ROI to correspond with the z-level of the image.  
 Different from *setZValue!!*

**get\_roi\_graphics\_object()** → *mesmerize.pyqtgraphCore.graphicsItems.ScatterPlotItem.ScatterPlotItem*  
 Get the QGraphicsObject used for visualization of the spatial localization of the ROI

**reset\_color()**

Reset the color of this ROI back to the original color

**set\_original\_color(*color*)**

Set the original color for this ROI

**Parameters** **color** – 1D numpy array of 4 floating point numbers (range 0 - 255) in RGBA format, [R, G, B, A]

**get\_color()**

Get the current color of this ROI

**Returns** 1D numpy array of 4 floating point numbers (range 0 - 255) in RGBA format, [R, G, B, A]

**Return type** np.ndarray

**set\_color(*color: Union[numpy.ndarray, str], \*args, \*\*kwargs*)**

Set the current color of this ROI

**Parameters** **color** – 1D numpy array of 4 floating point numbers (range 0 - 255) in RGBA format, [R, G, B, A]

**set\_text(*text: str*)**

Not implemented

**set\_tag(*roi\_def: str, tag: str*)**

Set a tag for the passed roi\_def

**Parameters**

- **roi\_def** – The ROI\_DEF that should be tagged
- **tag** – The tag to label for the passed ROI\_DEF/ROI Type

**get\_tag(*roi\_def*) → str**

Get the tag that is set to the passed 'roi\_def'

**Return type** str

**get\_all\_tags() → dict**

Get all the tags for all the ROI\_DEFS

**Return type** dict

**add\_to\_viewer()**

Add this ROI to the viewer.

**remove\_from\_viewer()**

Remove this ROI from the viewer

**classmethod from\_state(*curve\_plot\_item:***

*mesmerize.pyqtgraphCore.graphicsItems.PlotDataItem.PlotDataItem, view\_box:*

*mesmerize.pyqtgraphCore.graphicsItems.ViewBox.ViewBox.ViewBox, state:*

*dict, \*\*kwargs*)

Restore this ROI from a state

**Parameters**

- **curve\_plot\_item** – The plot item that is used for display the curves in the viewer
- **view\_box** – ViewBox containing the image sequence, used for overlaying the ROIs on top of the image



- **state** – ROI state, used for restoring the ROIs. Pass None is not restoring an ROI from a state dict

**set\_curve\_data**(*y\_vals*: *numpy.ndarray*, *set\_plot*: *bool = True*)  
 Set the curve data

## CNMFROI

**class** `mesmerize.viewer.modules.roi_manager_modules.roi_types.CNMFROI`(*curve\_plot\_item*: *mesmerize.pyqtgraphCore.graphicsItems.PlotDataItem*, *view\_box*: *mesmerize.pyqtgraphCore.graphicsItems.ViewBox.ViewBox*, *cnmf\_idx*: *Optional[int] = None*, *curve\_data*: *Optional[numpy.ndarray] = None*, *contour*: *Optional[dict] = None*, *state*: *Optional[dict] = None*, *spike\_data*: *Optional[numpy.ndarray] = None*, *dfof\_data*: *Optional[numpy.ndarray] = None*, *metadata*: *Optional[dict] = None*, *\*\*kwargs*)

Bases: `mesmerize.viewer.modules.roi_manager_modules.roi_types.ScatterROI`

A class for ROIs imported from CNMF(E) output data

**get\_roi\_graphics\_object**() → `mesmerize.pyqtgraphCore.graphicsItems.ScatterPlotItem.ScatterPlotItem`  
 Get the QGraphicsObject used for visualization of the spatial localization of the ROI

**set\_roi\_graphics\_object**(*xs*: *numpy.ndarray*, *ys*: *numpy.ndarray*)  
 Set the QGraphicsObject used for visualization of the spatial localization of the ROI

**reset\_color**()  
 Reset the color of this ROI back to the original color

**set\_original\_color**(*color*)  
 Set the original color for this ROI

**Parameters** *color* – 1D numpy array of 4 floating point numbers (range 0 - 255) in RBGA format, [R, G, B, A]

**get\_color**()  
 Get the current color of this ROI

**Returns** 1D numpy array of 4 floating point numbers (range 0 - 255) in RBGA format, [R, G, B, A]

**Return type** `np.ndarray`

**set\_color**(*color*: *Union[numpy.ndarray, str]*, *\*args*, *\*\*kwargs*)  
 Set the current color of this ROI

**Parameters** *color* – 1D numpy array of 4 floating point numbers (range 0 - 255) in RBGA format, [R, G, B, A]

**set\_text**(*text*: *str*)  
 Not implemented

**set\_tag**(*roi\_def: str, tag: str*)

Set a tag for the passed roi\_def

**Parameters**

- **roi\_def** – The ROI\_DEF that should be tagged
- **tag** – The tag to label for the passed ROI\_DEF/ROI Type

**get\_tag**(*roi\_def*) → *str*

Get the tag that is set to the passed 'roi\_def'

**Return type** *str*

**get\_all\_tags**() → *dict*

Get all the tags for all the ROI\_DEFS

**Return type** *dict*

**add\_to\_viewer**()

Add this ROI to the viewer.

**remove\_from\_viewer**()

Remove this ROI from the viewer

**classmethod from\_state**(*curve\_plot\_item:*

*mesmerize.pyqtgraphCore.graphicsItems.PlotDataItem.PlotDataItem, view\_box:*

*mesmerize.pyqtgraphCore.graphicsItems.ViewBox.ViewBox.ViewBox, state:*

*dict, \*\*kwargs*)

Restore this ROI from a state

**Parameters**

- **curve\_plot\_item** – The plot item that is used for display the curves in the viewer
- **view\_box** – ViewBox containing the image sequence, used for overlaying the ROIs on top of the image
- **state** – ROI state, used for restoring the ROIs. Pass None is not restoring an ROI from a state dict

**set\_curve\_data**(*y\_vals: numpy.ndarray, set\_plot: bool = True*)

Set the curve data

**\_\_init\_\_**(*curve\_plot\_item: mesmerize.pyqtgraphCore.graphicsItems.PlotDataItem.PlotDataItem, view\_box:*

*mesmerize.pyqtgraphCore.graphicsItems.ViewBox.ViewBox.ViewBox, cnmf\_idx: Optional[int] =*

*None, curve\_data: Optional[numpy.ndarray] = None, contour: Optional[dict] = None, state:*

*Optional[dict] = None, spike\_data: Optional[numpy.ndarray] = None, dfof\_data:*

*Optional[numpy.ndarray] = None, metadata: Optional[dict] = None, \*\*kwargs*)

Instantiate attributes.

**Type** *curve\_data: np.ndarray*

**Parameters**

- **curve\_data** – 1D numpy array of y values
- **cnmf\_idx** – original index of the ROI from cnmf\_idx\_components

**to\_state**() → *dict*

Must be implemented in subclass

## 1.50.6 Basic Examples

These examples can be run through the viewer console or *Script editor* to interact with the ROIs.

**See also:**

*Back-end ROI Manager APIs, ROIList API, ROI Type APIs*

Get the back-end ROI Manager, see *ROI Manager APIs*

```
>>> get_workEnv().roi_manager
<mesmerize.viewer.modules.roi_manager_modules.managers.ManagerCNMFROI object at 0x7f01b8780668>
```

Get the ROI List, see *ROIList API*

```
>>> get_workEnv().roi_manager.roi_list
[<mesmerize.viewer.modules.roi_manager_modules.roi_types.CNMFROI object at 0x7f01bc78b278>, <mesmerize.viewer.modules.roi_manager_modules.roi_types.CNMFROI object at 0x7f01bc817630>, <mesmerize.viewer.modules.roi_manager_modules.roi_types.CNMFROI object at 0x7f01bc817668>, <mesmerize.viewer.modules.roi_manager_modules.roi_types.CNMFROI object at 0x7f01bc7c5438>, <mesmerize.viewer.modules.roi_manager_modules.roi_types.CNMFROI object at 0x7f01bc7c5208>]
```

Work with an ROI object, see *ROI Type APIs*

```
# Get the curve data of an ROI
>>> get_workEnv().roi_manager.roi_list[3].curve_data
(array([ 0, 1, 2, ..., 2995, 2996, 2997]), array([-207.00168389, -161.78229208, -157.62522988, ..., -1017.73174502, -1030.27047731, -1042.26989668]))

# Get the tags of an ROI
>>> get_workEnv().roi_manager.roi_list[2].get_all_tags()
{'anatomical_location': 'tail', 'cell_name': 'dcen', 'morphology': 'untagged'}

# Get a single tag
>>> get_workEnv().roi_manager.roi_list[2].get_tag('cell_name')
'dcen'
```

## 1.51 Stimulus Mapping

### 1.51.1 ModuleGUI

```
class mesmerize.viewer.modules.stimulus_mapping.ModuleGUI(parent, viewer)
```

**property maps:** dict

Returns a dictionary of the stimulus maps

## 1.51.2 Page

Each Page instance contains the mapping data for one stimulus type

`class mesmerize.viewer.modules.stimmap_modules.page.Page(parent, stim_type: str)`

`set_data(dataframe: pandas.core.frame.DataFrame)`

Set the stimulus map

**Parameters** `dataframe` – DataFrame with the appropriate rows (see `add_row()`)

`get_dataframe()` → `pandas.core.frame.DataFrame`

Get the stimulus map as a DataFrame

`set_units(units: str)`

Set the time units

**Parameters** `units` – One of ‘frames’ or ‘seconds’

`get_units()` → `str`

Get the time units

`add_row(pd_series: Optional[pandas.core.series.Series] = None)`

Add a row to the stimulus map

**Parameters** `pd_series` – pandas series containing the following: stimulus name, start, end, and color

**Returns**

`delete_row(row: Union[mesmerize.viewer.modules.stimmap_modules.row.Row, int])`

Delete a row from the stimulus map

**Parameters** `row` – The Row object to remove or the numerical index of the row

`clear()`

Clear the stimulus map

## 1.51.3 DataFrame Format

`Page.set_data()` expects a DataFrame in the following format

Columns

| Column | Description                               |
|--------|-------------------------------------------|
| name   | Stimulus name                             |
| start  | Start time of stimulus period             |
| end    | End time of stimulus period               |
| color  | Color to display in the viewer curve plot |

Data types:

| Column | Data type                                                                                         |
|--------|---------------------------------------------------------------------------------------------------|
| name   | str                                                                                               |
| start  | numpy.float64                                                                                     |
| end    | numpy.float64                                                                                     |
| color  | Tuple in RGBA format<br><br>(int, int, int, int)<br><br>Each int must be within the 0 - 255 range |

### Example

| name    | start  | end    | color            |
|---------|--------|--------|------------------|
| control | 0.0    | 328.0  | (0, 75, 0, 255)  |
| stim_A  | 328.0  | 1156.0 | (0, 0, 125, 255) |
| stim_C  | 1156.0 | 2987.0 | (125, 0, 0, 255) |

### 1.51.4 Example

This example creates a pandas DataFrame from a csv file to set the stimulus mappings. It uses the csv file from the pvc-7 dataset available on CRCNS: <http://dx.doi.org/10.6080/K0C8276G>

You can also download the csv here: `stimulus_pvc7.csv`

This example is meant to be run through the *Viewer Script Editor*

```

1  import pandas as pd
2  from mesmerize.plotting.utils import get_colormap
3
4  # Load dataframe from CSV
5  df = pd.read_csv('path_to_csv_file')
6
7  # Sort according to time
8  df.sort_values(by='start').reset_index(drop=True, inplace=True)
9
10 # Trim off the stimulus periods that are not in the current image sequence
11 trim = get_image().shape[2]
12 df = df[df['start'] <= trim]
13
14 # get one dataframe for each of the stimulus types
15 ori_df = df.drop(columns=['sf', 'tf', 'contrast']) # contains ori stims
16 sf_df = df.drop(columns=['ori', 'tf', 'contrast']) # contains sf stims
17 tf_df = df.drop(columns=['sf', 'ori', 'contrast']) # contains tf stims
18
19 # Rename the stimulus column of interest to "name"
20 ori_df.rename(columns={'ori': 'name'}, inplace=True)
21 sf_df.rename(columns={'sf': 'name'}, inplace=True)
22 tf_df.rename(columns={'tf': 'name'}, inplace=True)
23
24
25 # Get the stimulus mapping module

```

(continues on next page)

(continued from previous page)

```

26 smm = get_module('stimulus_mapping')
27
28 # set the stimulus map in Mesmerize for each of the 3 stimulus types
29 for stim_type, _df in zip(['ori', 'sf', 'tf'], [ori_df, sf_df, tf_df]):
30     # data in the name column must be `str` type for stimulus mapping module
31     _df['name'] = _df['name'].apply(str)
32
33     # Get the names of the stimulus periods
34     stimuli = _df['name'].unique()
35     stimuli.sort()
36
37     # Create colormap with the stimulus names
38     stimuli_cmap = get_colormap(stimuli, 'tab10', output='pyqt', alpha=0.6)
39
40     # Create a column with colors that correspond to the stimulus names
41     # This is for illustrating the stimulus periods in the viewer plot
42     _df['color'] = _df['name'].map(stimuli_cmap)
43
44     # Set the data in the Stimulus Mapping module
45     smm.maps[stim_type].set_data(_df)

```

## 1.52 Data types used for analysis

### 1.52.1 Transmission

#### Inherits from BaseTransmission

```

class mesmerize.Transmission(df: pandas.core.frame.DataFrame, history_trace:
    mesmerize.analysis.data_types.HistoryTrace, proj_path: Optional[str] = None,
    last_output: Optional[str] = None, last_unit: Optional[str] = None,
    ROI_DEFS: Optional[list] = None, STIM_DEFS: Optional[list] = None,
    CUSTOM_COLUMNS: Optional[list] = None, plot_state: Optional[dict] =
    None)

```

The transmission object used throughout the flowchart

```

__init__(df: pandas.core.frame.DataFrame, history_trace: mesmerize.analysis.data_types.HistoryTrace,
    proj_path: Optional[str] = None, last_output: Optional[str] = None, last_unit: Optional[str] =
    None, ROI_DEFS: Optional[list] = None, STIM_DEFS: Optional[list] = None,
    CUSTOM_COLUMNS: Optional[list] = None, plot_state: Optional[dict] = None)

```

Base class for common Transmission functions

#### Parameters

- **df** (*pd.DataFrame*) – Transmission dataframe
- **history\_trace** (*HistoryTrace*) – HistoryTrace object, keeps track of the nodes & node parameters the transmission has been processed through
- **proj\_path** (*str*) – Project path, necessary for the datapoint tracer
- **last\_output** (*str*) – Last data column that was appended via a node's operation
- **last\_unit** (*str*) – Current units of the data. Refers to the units of column in last\_output

- **plot\_state** (*dict*) – State of a plot, such as data and label columns. Used when saving interactive plots.

#### Variables

- **df** – DataFrame instance
- **history\_trace** – *HistoryTrace instance*
- **last\_output** – Name of the DataFrame column that contains data from the most recent node
- **last\_unit** – The data units for the data in the column of ‘last\_output’
- **plot\_state** – State of a plot, containing user entered plot parameters. Used for storing interactive plot states.

**static empty\_df**(*transmission, addCols: Optional[list] = None*) → pandas.core.frame.DataFrame  
 Just a helper method to return an empty DataFrame with the same columns

#### Parameters

- **transmission** – Transmission object that forms the basis
- **addCols** – list of columns to add

**Returns** The input transmission with an empty dataframe containing the same columns and any additional columns that were passed

**classmethod from\_pickle**(*path*)  
 Load Transmission from a pickle.

**Parameters path** – file path, usually ends in .trn

**to\_pickle**(*path: str*)  
 Save Transmission as a pickle. Not recommended for sharing data, use [to\\_hdf5\(\)](#)

**Parameters path** – file path, usually ends in .trn

**classmethod from\_hdf5**(*path: str*)  
 Create Transmission from an hdf5 file. See [HdfTools](#) for information on the file structure.

**Parameters path** – file path, usually ends in .trn (.ptrn for plots)

**to\_hdf5**(*path: str*)  
 Save as an hdf5 file. Uses pytables to save the DataFrame, serializes the HistoryTrace using JSON. See [HdfTools](#)

**Parameters path** – file path, usually ends in .trn

**get\_proj\_path**() → *str*  
 Get the project root dir associated to this Transmission.

**Returns** Root directory of the project

**set\_proj\_path**(*path: str*)  
 Set the project root dir for this transmission.

Used for finding associated project files, for example the Datapoint Tracer uses it to find max and std projections of image sequences.

**Parameters path** – Root directory of the project

**to\_dict**() → *dict*  
 Package Transmission as a dict, useful for saving to hdf5 or pickle

```
classmethod from_proj(proj_path: str, dataframe: pandas.core.frame.DataFrame, sub_dataframe_name:
                    str = 'root', dataframe_filter_history: Optional[dict] = None)
```

#### Parameters

- **proj\_path** – root directory of the project
- **dataframe** – Chosen Child DataFrame from the Mesmerize Project
- **sub\_dataframe\_name** – Name of the sub DataFrame to load
- **dataframe\_filter\_history** – Filter history of the child dataframe

```
static _load_files(proj_path: str, row: pandas.core.series.Series) → pandas.core.series.Series
```

Loads npz of curve data and pickle files containing metadata using the paths specified in each row of the chosen sub-dataframe of the project

```
classmethod merge(transmissions: list)
```

Merges a list of Transmissions into one transmission. A single DataFrame is created by simple concatenation. HistoryTrace objects are also merged using HistoryTrace.merge.

**Parameters** **transmissions** – A list containing Transmission objects to merge

**Returns** Merged transmission

## 1.52.2 HistoryTrace

```
class mesmerize.analysis.data_types.HistoryTrace(history: Optional[Dict[Union[uuid.UUID, str],
                                List[Dict]]] = None, data_blocks:
                                Optional[List[Union[uuid.UUID, str]]] = None)
```

Structure of a history trace:

A dict with keys that are the block\_ids. Each dict value is a list of operation\_dicts. Each operation\_dict has a single key which is the name of the operation and the value of that key is the operation parameters.

```
{block_id_1: [
    {operation_1:
      {
        param_1: a,
        param_2: b,
        param_n, z
      }
    },
  {operation_2:
    {
      param_1: a,
      param_n, z
    }
  },
  ...
]
```



```
        {operation_n:
          {
            param_n: x
          }
        }
      ]
    block_id_2: <list of operation dicts>,
    ...
    block_id_n: <list of operation dicts>
  }
```

**The main dict illustrated above should never be worked with directly.**

**You must use the helper methods of this class to query or add information**

```
__init__(history: Optional[Dict[Union[uuid.UUID, str], List[Dict]]] = None, data_blocks: Optional[List[Union[uuid.UUID, str]]] = None)
```

#### Parameters

- **history** – Dict containing a data block UUIDs as keys. The values are a list of dicts containing operation parameters.
- **data\_blocks** – List of data block UUIDs

#### Variables

- **\_history** – The dict of the actual data, as illustrated above. Should not be accessed directly. Use the *history* property or call *get\_all\_data\_blocks\_history()*.
- **\_data\_blocks** – List of all data blocks. Should not be accessed directly, use the *data\_blocks* property instead.

**property data\_blocks: list**

List of UUIDs that allow you to pin down the history of specific rows of the dataframe to their history as stored in the history trace data structure (self.history)

**property history: dict**

The analysis log that is stored in the structure outlined in the doc string

```
create_data_block(dataframe: pandas.core.frame.DataFrame) → Tuple[pandas.core.frame.DataFrame, uuid.UUID]
```

Creates a new UUID, assigns it to the input dataframe by setting the UUID in the `_BLOCK_` column

**Parameters dataframe** – Assigns a block ID to this entire DataFrame.

```
_add_data_block(data_block_id: uuid.UUID)
```

Adds new datablock UUID to the list of datablocks in this instance. Throws exception if UUID already exists.

```
add_operation(data_block_id: Union[uuid.UUID, str], operation: str, parameters: dict)
```

Add a single operation, that is usually performed by a node, to the history trace. Added to all or specific datablock(s), depending on which datablock(s) the node performed the operation on

#### Parameters

- **data\_block\_id** – data\_block\_id to log the operation on to. either a UUID or ‘all’ to append the operation to all data blocks
- **operation** – name of the operation, usually the same as the name of the node in all lowercase
- **parameters** – operation parameters.

**get\_data\_block\_history**(*data\_block\_id: Union[str, uuid.UUID]*, *copy: bool = False*) → List[dict]  
Get the full history trace of a single data block.

Use copy=False if you want to modify the history trace of the data block.

**Parameters**

- **data\_block\_id** (*Union[str, UUID]*) – data block ID
- **copy** (*bool*) – If true, returns a deepcopy

**Returns** data block history

**Return type** List[dict]

**get\_all\_data\_blocks\_history**() → dict  
Returns history trace of all datablocks

**get\_operations\_list**(*data\_block\_id: Union[uuid.UUID, str]*) → list  
Returns just a simple list of operations in the order that they were performed on the given datablock. To get the operations along with their parameters call get\_data\_block\_history()

**get\_operation\_params**(*data\_block\_id: Union[uuid.UUID, str]*, *operation: str*) → dict  
Get the parameters dict for a specific operation that was performed on a specific data block

**check\_operation\_exists**(*data\_block\_id: uuid.UUID*, *operation: str*) → bool  
Check if a specific operation was performed on a specific datablock

**static \_to\_uuid**(*u: Union[str, uuid.UUID]*) → uuid.UUID  
If argument ‘u’ is type <str> that can be formatted as a UUID, return it as UUID type. If argument ‘u’ is a UUID, just return it.

**to\_dict**() → dict  
Package the HistoryTrace instance as a dict. Converts all UUIDs to <str> representation for JSON compatibility.

**static from\_dict**(*d: dict*) → dict  
Format a dict stored using HistoryTrace.to\_dict so that it can be used to create a HistoryTrace instance. Converts all the <str> representations of UUID back to <uuid.UUID> types.

**Parameters** **d** – dict containing appropriate ‘history’ and ‘datablocks’ keys. Must be packaged by HistoryTrace.to\_dict()

**Returns** dict formatted so that it can be used to instantiate a HistoryTrace instance recapitulating the HistoryTrace it was packaged from.

**to\_json**(*path: str*)  
Save HistoryTrace to a JSON file.

**Parameters** **path** – file path, usually ends with .json

**classmethod from\_json**(*path: str*)  
Instantiate HistoryTrace from JSON file (that was saved using HistoryTrace.to\_json)

**Parameters** **path** – file path, usually ends with .json

**to\_pickle**(*path: str*)

Dump this instance to a pickle

**Parameters** *path* – file path

**classmethod from\_pickle**(*path: str*)

Load HistoryTrace that was pickled

**Parameters** *path* – file path

**classmethod merge**(*history\_traces: list*)

Merge a list of HistoryTrace instances into one HistoryTrace instance. Useful when merging Transmission objects.

**Parameters** *history\_traces* – list of HistoryTrace instances

**draw\_graph**(*data\_block\_id: Union[str, uuid.UUID], \*\*kwargs*) → *str*

Draw graph of a data block. kwargs are passed to `mesmerize.common.utils.draw_graph`

**Parameters** *data\_block\_id* (*Union[str, UUID]*) – data block ID from which to get history to draw in a graph

**Returns** file path to the graph pdf file

**Return type** *str*

**static clean\_history\_trace**(*db\_history: list*) → *list*

Cleans up excessive data such as frequencies linspaces and linkage matrices so the graph is viewable.

**Parameters** *db\_history* – data block history

**Returns** data block history with excessive params removed

### 1.52.3 Examples

You can save a Transmission files using the *Save node* and work with the data directly in scripts, jupyter notebooks etc. You can also save them through the flowchart console (and plot consoles) through *Transmission.to\_hdf5*.

#### Working with Transmission files

Load a saved Transmission instance using *Transmission.from\_hdf5*

```

1 >>> from mesmerize import Transmission
2 >>> from uuid import UUID
3
4 # load transmission file
5 >>> t = Transmission.from_hdf5('/share/data/temp/kushal/data.trn')
6 <mesmerize.analysis.data_types.Transmission at 0x7f4d42f386a0>
7
8 # The DataFrame is always the 'df' attribute
9 >>> t.df.head()
10
11           CurvePath  ... FCLUSTER_LABELS
12 0  curves/a2-_-1-_-843c2d43-75f3-421a-9fef-483d1e...  ...      8
13 1  curves/brn3b_a6-_-2-_-21557a64-6868-4ff4-8db1-...  ...      4
14 2  curves/brn3b_a6-_-2-_-21557a64-6868-4ff4-8db1-...  ...      5
15 3  curves/brn3b_day1_3-_-2-_-ff3e95df-0e15-495c-9...  ...      8
16 4  curves/brn3b_day1_3-_-2-_-ff3e95df-0e15-495c-9...  ...      6

```

(continues on next page)

(continued from previous page)

```

17
18 [5 rows x 27 columns]
19
20 # the `df` is just a pandas dataframe
21 # View a list of samples in the current file
22 >>> t.df.SampleID.unique()
23
24 array(['a2--1', 'a5--1', 'brn3b_a6--2', 'brn3b_day1_3--2',
25       'brn3b_day1_a1--2', 'brn3b_day1_a2--2', 'brn3b_day1_a4--2',
26       'brn3b_day2_a1--2', 'brn3b_day2_a1--t', 'brn3b_day2_a10--2',
27       'brn3b_day2_a2--1', 'brn3b_day2_a2--3', 'brn3b_day2_a8--1',
28       'cesa_a1--1', 'cesa_a1--2', 'cesa_a1_jan_2019--1',
29       'cesa_a1_jan_2019--2', 'cesa_a2--2', 'cesa_a6--1',
30       'cesa_a7--1', 'cesa_a7--2', 'cesa_a8--1', 'cesa_a9--1',
31       'cng_ch4_day1_a2--t1', 'cng_ch4_day1_a2--t2',
32       'cng_ch4_day2_a4--t1', 'dmrt1_day1_a2--2', 'dmrt1_day1_a4--t2',
33       'dmrt1_day1_a5--', 'dmrt1_day1_a6--t', 'dmrt1_day1_a6--t2',
34       'dmrt1_day2_a1--t1', 'dmrt1_day2_a1--t2', 'dmrt1_day2_a2--t1',
35       'dmrt1_day2_a3--t1', 'dmrt1_day2_a3--t2', 'dmrt1_day2_a4--t1',
36       'dmrt1_day2_a4--t2', 'hnk1_a5--2', 'hnk1_a6--1', 'hnk1_a7--1',
37       'hnk1_a7--2', 'hnk1_a8--1', 'pc2_a10--1', 'pc2_a11--1',
38       'pc2_a13--1', 'pc2_a14--1', 'pc2_a15--1', 'pc2_a16--1',
39       'pc2_a9--1', 'pde9_day1_a2--2', 'pde9_day1_a3--1',
40       'pde9_day1_a4--1', 'pde9_day1_a4--2', 'pde9_day2_a2--t2',
41       'pde9_day2_a2--t4', 'pde9_day2_a4--t1', 'pde9_day2_a4--t2',
42       'pde9_day2_a4--t3', 'pde9_day2_a5--t1', 'pde9_day2_a5--t2',
43       'pde9_day2_a6--t1', 'pde9_day2_a7--t1', 'pde9_day2_a7--t2'],
44       dtype=object)
45
46 # Show data associated with a single sample
47 >>> t.df[t.df['SampleID'] == 'brn3b_day1_a1--2']
48
49           CurvePath ... FCLUSTER_LABELS
50 6  curves/brn3b_day1_a1--2--d3c5f225-7039-4abd-... 6
51 7  curves/brn3b_day1_a1--2--d3c5f225-7039-4abd-... 6
52 8  curves/brn3b_day1_a1--2--d3c5f225-7039-4abd-... 5
53 9  curves/brn3b_day1_a1--2--d3c5f225-7039-4abd-... 7
54 10 curves/brn3b_day1_a1--2--d3c5f225-7039-4abd-... 5
55
56 # View the data associated with one ROI
57 # the `uuid_curve` is a unique identifier for each curve/ROI
58 >> t.df[t.df['SampleID'] == 'brn3b_day1_a1--2'].iloc[0]
59
60 CurvePath          curves/brn3b_day1_a1--2--d3c5f225-7039-4abd-...
61 ImgInfoPath       images/brn3b_day1_a1--2--d3c5f225-7039-4abd-...
62 ImgPath           images/brn3b_day1_a1--2--d3c5f225-7039-4abd-...
63 ImgUUID           d3c5f225-7039-4abd-a7a1-5e9ef2150013
64 ROI_State         {'roi_xs': [554, 553, 553, 552, 552, 551, 551,...
65 SampleID          brn3b_day1_a1--2
66 anatomical_location      palp
67 cell_name           palp
68 comments           untagged

```

(continues on next page)

(continued from previous page)

```

69 date 20190425_110103
70 dorso_ventral_axis untagged
71 misc {}
72 morphology untagged
73 promoter brn3b
74 rostro_caudal_axis untagged
75 stimulus_name [untagged]
76 uuid_curve f44fbd3d-6eaa-4e19-a677-496908565fde
77 _RAW_CURVE [81.41972198848178, 75.61356993008134, 70.0493...
78 meta {'origin': 'AwesomeImager', 'version': '4107ff...
79 stim_maps [[None]]
80 _BLOCK_ 3e069e2d-d012-47ee-830c-93d85197e2f4
81 _SPLICE_ARRAYS [2.646593459501195, 1.8252819116136887, 1.7422...
82 _NORMALIZE [0.0681729940259753, 0.06533186950232853, 0.06...
83 _RFFT [443.19357880089615, -66.8777897472859, 55.244...
84 _ABSOLUTE_VALUE [443.19357880089615, 66.8777897472859, 55.2443...
85 _LOG_TRANSFORM [2.646593459501195, 1.8252819116136887, 1.7422...
86 FCLUSTER_LABELS 6
87 Name: 6, dtype: object
88
89 # Show the ROI object data
90 >>> t.df[t.df['SampleID'] == 'brn3b_day1_a1--2'].iloc[0]['ROI_State']
91
92 {'roi_xs': array([554, 553, 553, 552, 552, 551, 551, 551, 551, 550, 550, 550, 549,
93 548, 547, 547, 546, 546, 545, 545, 544, 543, 543, 542, 541, 541,
94 540, 540, 539, 539, 538, 537, 536, 535, 534, 533, 532, 531, 531,
95 530, 529, 528, 527, 527, 526, 526, 525, 525, 525, 524, 524, 523,
96 522, 522, 521, 521, 520, 521, 521, 521, 521, 521, 522, 522, 522,
97 522, 522, 522, 522, 521, 521, 521, 521, 521, 521, 521, 522, 523,
98 524, 524, 525, 525, 525, 526, 526, 527, 528, 528, 529, 529, 529,
99 530, 530, 531, 532, 532, 533, 534, 535, 535, 536, 536, 537, 538,
100 539, 540, 540, 541, 541, 542, 542, 543, 544, 545, 546, 546, 547,
101 548, 548, 549, 549, 549, 549, 550, 550, 550, 550, 551, 551, 551,
102 552, 552, 552, 553, 553, 553, 554, 554, 554, 553, 554, 554, 554,
103 554, 554]),
104 'roi_ys': array([155, 156, 156, 157, 157, 158, 159, 160, 160, 161, 162, 162, 162,
105 162, 163, 163, 164, 164, 165, 165, 165, 166, 166, 166, 167, 167,
106 167, 166, 167, 167, 167, 167, 167, 167, 167, 167, 167, 167, 168, 168,
107 168, 168, 168, 168, 167, 167, 166, 166, 165, 164, 164, 163, 163,
108 163, 162, 162, 161, 161, 160, 160, 159, 158, 157, 156, 156, 155,
109 154, 153, 152, 151, 150, 150, 149, 148, 147, 146, 145, 144, 144,
110 144, 144, 143, 143, 142, 141, 141, 140, 140, 140, 139, 139, 138,
111 137, 137, 136, 136, 136, 135, 135, 135, 136, 136, 137, 137, 137,
112 137, 137, 138, 138, 138, 137, 137, 136, 136, 136, 136, 137, 137,
113 137, 138, 138, 139, 140, 141, 141, 142, 143, 144, 144, 145, 146,
114 146, 147, 148, 148, 149, 150, 150, 151, 151, 152, 152, 153, 154,
115 155, 155]),
116 'curve_data': (array([ 0, 1, 2, ..., 2996, 2997, 2998]),
117 array([ 81.41972199, 75.61356993, 70.04934883, ..., 195.4416283 ,
118 184.8844155 , 174.76708104])),
119 'tags': {'anatomical_location': 'palp',
120 'cell_name': 'palp',

```

(continues on next page)

(continued from previous page)

```

121 'morphology': 'untagged'},
122 'roi_type': 'CNMFROI',
123 'cnmf_idx': 2}

```

## View History Log

Transmissions have a *history\_trace* attribute which is an instance of *HistoryTrace*.

Use the *get\_data\_block\_history* and *get\_operations\_list* methods to view the history log of a data block.

```

1  # To view the history log, first get the block UUID of the dataframe row of which you
  ↪ want the history log
2
3  # Block UUIDs are stored in the _BLOCK_ column
4  >>> bid = t.df.iloc[10]._BLOCK_
5  >>> bid
6
7  '248a6ece-e60e-4a09-845e-188a5199d262'
8
9  # Get the history log of this data block
10 # HistoryTrace.get_operations_list() returns a list of operations, without parameters
11 # HistoryTrace.get_data_block_history() returns the operations list with the parameters
12 >>> t.history_trace.get_operations_list(bid)
13
14 ['spawn_transmission',
15  'splice_arrays',
16  'normalize',
17  'rfft',
18  'absolute_value',
19  'log_transform',
20  'splice_arrays',
21  'fcluster']
22
23 # View the entire history log with all params
24 >>> t.history_trace.get_data_block_history(bid)
25
26 [{'spawn_transmission': {'sub_dataframe_name': 'neuronal',
27  'dataframe_filter_history': {'dataframe_filter_history': ['df[~df["promoter"].isin([\
  ↪ 'cesa', \ 'hnk1\'])]',
28    'df[~df["promoter"].isin([\ 'cesa', \ 'hnk1\'])]',
29    'df[~df["cell_name"].isin([\ 'not_a_neuron', \ 'non_neuronal', \ 'untagged', \
  ↪ 'ependymal\'])]']}]},
30  {'splice_arrays': {'data_column': '_RAW_CURVE',
31    'start_ix': 0,
32    'end_ix': 2990,
33    'units': 'time'}},
34  {'normalize': {'data_column': '_SPLICE_ARRAYS', 'units': 'time'}},
35  {'rfft': {'data_column': '_NORMALIZE',
36    'frequencies': [0.0,
37    0.0033444816053511705,
38    0.0033444816053511705,

```

(continues on next page)

```

39     0.006688963210702341,
40     ...
41
42     # Get the parameters for the 'fcluster' operation
43     >>> fp = t.history_trace.get_operation_params(bid, 'fcluster')
44
45     # remove the linkage matrix first so we can view the other params
46     >>> fp.pop('linkage_matrix');fp
47
48     {'threshold': 8.0,
49      'criterion': 'maxclust',
50      'depth': 1,
51      'linkage_params': {'method': 'complete',
52                        'metric': 'wasserstein',
53                        'optimal_ordering': True}}
54
55     # Draw the analysis history as a graph
56     # This will open your defeault pdf viewer with the graph
57     >>> t.history_trace.draw_graph(bid, view=True)
58
59     # If you are using the API to perform analysis on
60     # transmission files, you can use the `HistoryTrace`
61     # to log the analysis history
62     # For example, add a number `3.14` to all datapoints in a curve
63     >>> t.df['_RAW_CURVE'] = t.df['_RAW_CURVE'].apply(lambda x: x + 3.14)
64
65     # Append the analysis log
66     >>> t.history_trace.add_operation(data_block_id='all', operation='addition', parameters={
        ↪ 'value': 3.14})

```

## 1.53 Analysis

Analysis helper functions

### 1.53.1 Utils

`mesmerize.analysis.utils.get_array_size(transmission: mesmerize.analysis.data_types.Transmission, data_column: str) → int`

Returns the size of the 1D arrays in the specified data column. Throws an exception if they do not match

#### Parameters

- **transmission** (`Transmission`) – Desired Transmission
- **data\_column** (`str`) – Data column of the Transmission from which to retrieve the size

**Returns** Size of the 1D arrays of the specified data column

**Return type** `int`

`mesmerize.analysis.utils.get_frequency_linspace`(*transmission*: `mesmerize.analysis.data_types.Transmission`) → `Tuple[numpy.ndarray, float]`

Get the frequency linspace.

Throws an exception if all datablocks do not have the same linspace & Nyquist frequencies

**Parameters** `transmission` – Transmission containing data from which to get frequency linspace

**Returns** tuple: (frequency linspace as a 1D numpy array, nyquist frequency)

**Return type** `Tuple[np.ndarray, float]`

`mesmerize.analysis.utils.get_proportions`(*xs*: `Union[pandas.core.series.Series, numpy.ndarray, list]`, *ys*: `Union[pandas.core.series.Series, numpy.ndarray]`, *xs\_name*: `str = 'xs'`, *ys\_name*: `str = 'ys'`, *swap*: `bool = False`, *percentages*: `bool = True`) → `pandas.core.frame.DataFrame`

Get the proportions of xs vs ys.

xs & ys are categorical data.

**Parameters**

- **xs** (`Union[pd.Series, np.ndarray]`) – data plotted on the x axis
- **ys** (`Union[pd.Series, np.ndarray]`) – proportions of unique elements in ys are calculated per xs
- **xs\_name** (`str`) – name for the xs data, useful for labeling the axis in plots
- **ys\_name** (`str`) – name for the ys data, useful for labeling the axis in plots
- **swap** (`bool`) – swap x and y

**Returns** `DataFrame` that can be plotted in a proportions bar graph

**Return type** `pd.DataFrame`

`mesmerize.analysis.utils.get_sampling_rate`(*transmission*: `mesmerize.analysis.data_types.Transmission`, *tolerance*: `Optional[float] = 0.1`) → `float`

Returns the mean sampling rate of all data in a `Transmission` if it is within the specified tolerance. Otherwise throws an exception.

**Parameters**

- **transmission** (`Transmission`) – `Transmission` object of the data from which sampling rate is obtained.
- **tolerance** (`float`) – Maximum tolerance (in Hertz) of sampling rate variation between different samples

**Returns** The mean sampling rate of all data in the `Transmission`

**Return type** `float`

`mesmerize.analysis.utils.organize_dataframe_columns`(*columns*: `Iterable[str]`) → `Tuple[List[str], List[str], List[str]]`

Organizes `DataFrame` columns into data column, categorical label columns, and uuid columns.

**Parameters** `columns` – All `DataFrame` columns

**Returns** (`data_columns`, `categorical_columns`, `uuid_columns`)

**Return type** `Tuple[List[str], List[str], List[str]]`



`mesmerize.analysis.utils.pad_arrays`(*a*: *numpy.ndarray*, *method*: *str* = 'random', *output\_size*: *Optional[int]* = None, *mode*: *str* = 'minimum', *constant*: *Optional[Any]* = None) → *numpy.ndarray*

Pad all the input arrays so that are of the same length. The length is determined by the largest input array. The padding value for each input array is the minimum value in that array.

Padding for each input array is either done after the array's last index to fill up to the length of the largest input array (method 'fill-size') or the padding is randomly flanked to the input array (method 'random') for easier visualization.

#### Parameters

- **a** (*np.ndarray*) – 1D array where each element is a 1D array
- **method** (*str*) – one of 'fill-size' or 'random', see docstring for details
- **output\_size** – not used
- **mode** (*str*) – one of either 'constant' or 'minimum'. If 'minimum' the min value of the array is used as the padding value. If 'constant' the values passed to the "constant" argument is used as the padding value.
- **constant** (*Any*) – padding value if 'mode' is set to 'constant'

**Returns** Arrays padded according to the chosen method. 2D array of shape [n\_arrays, size of largest input array]

**Return type** *np.ndarray*

## 1.53.2 Cross correlation

### functions

**Helper functions.** Uses `tslearn.cyc`

`mesmerize.analysis.math.cross_correlation.ncc_c`(*x*: *numpy.ndarray*, *y*: *numpy.ndarray*) → *numpy.ndarray*

Must pass 1D array to both x and y

#### Parameters

- **x** – Input array [x1, x2, x3, ... xn]
- **y** – Input array [y2, y2, x3, ... yn]

**Returns** Returns the normalized cross correlation function (as an array) of the two input vector arguments "x" and "y"

**Return type** *np.ndarray*

`mesmerize.analysis.math.cross_correlation.get_omega`(*x*: *Optional[numpy.ndarray]* = None, *y*: *Optional[numpy.ndarray]* = None, *cc*: *Optional[numpy.ndarray]* = None) → *int*

Must pass a 1D array to either both "x" and "y" or a cross-correlation function (as an array) to "cc"

#### Parameters

- **x** – Input array [x1, x2, x3, ... xn]
- **y** – Input array [y2, y2, x3, ... yn]
- **cc** – cross-correlation function represented as an array [c1, c2, c3, ... cn]

**Returns** index (x-axis position) of the global maxima of the cross-correlation function

**Return type** np.ndarray

`mesmerize.analysis.math.cross_correlation.get_lag`(*x: Optional[numpy.ndarray] = None, y: Optional[numpy.ndarray] = None, cc: Optional[numpy.ndarray] = None*) → float

Must pass a 1D array to either both “x” and “y” or a cross-correlation function (as an array) to “cc”

**Parameters**

- **x** – Input array [x1, x2, x3, ... xn]
- **y** – Input array [y2, y2, x3, ... yn]
- **cc** – cross-correlation function represented as a array [c1, c2, c3, ... cn]

**Returns** Position of the maxima of the cross-correlation function with respect to middle point of the cross-correlation function

**Return type** np.ndarray

`mesmerize.analysis.math.cross_correlation.get_epsilon`(*x: Optional[numpy.ndarray] = None, y: Optional[numpy.ndarray] = None, cc: Optional[numpy.ndarray] = None*) → float

Must pass a 1D vector to either both “x” and “y” or a cross-correlation function to “cc”

**Parameters**

- **x** – Input array [x1, x2, x3, ... xn]
- **y** – Input array [y2, y2, x3, ... yn]
- **cc** – cross-correlation function represented as an array [c1, c2, c3, ... cn]

**Returns** Magnitude of the global maxima of the cross-correlation function

**Return type** np.ndarray

`mesmerize.analysis.math.cross_correlation.get_lag_matrix`(*curves: Optional[numpy.ndarray] = None, ccs: Optional[numpy.ndarray] = None*) → numpy.ndarray

Get a 2D matrix of lags. Can pass either a 2D array of 1D curves or cross-correlations

**Parameters**

- **curves** – 2D array of 1D curves
- **ccs** – 2D array of 1D cross-correlation functions represented by arrays

**Returns** 2D matrix of lag values, shape is [n\_curves, n\_curves]

**Return type** np.ndarray

`mesmerize.analysis.math.cross_correlation.get_epsilon_matrix`(*curves: Optional[numpy.ndarray] = None, ccs: Optional[numpy.ndarray] = None*) → numpy.ndarray

Get a 2D matrix of maximas. Can pass either a 2D array of 1D curves or cross-correlations

**Parameters**

- **curves** – 2D array of 1D curves
- **ccs** – 2D array of 1D cross-correlation functions represented by arrays

**Returns** 2D matrix of maxima values, shape is [n\_curves, n\_curves]

**Return type** np.ndarray

`mesmerize.analysis.math.cross_correlation.compute_cc_data`(*curves: numpy.ndarray*) → *mesmerize.analysis.math.cross\_correlation.CC\_Data*

Compute cross-correlation data (cc functions, lag and maxima matrices)

**Parameters** *curves* – input curves as a 2D array, shape is [n\_samples, curve\_size]

**Returns** cross correlation data for the input curves as a *CC\_Data* instance

**Return type** *CC\_Data*

`mesmerize.analysis.math.cross_correlation.compute_ccs`(*a: numpy.ndarray*) → *numpy.ndarray*

Compute cross-correlations between all 1D curves in a 2D input array

**Parameters** *a* – 2D input array of 1D curves, shape is [n\_samples, curve\_size]

**Return type** *np.ndarray*

## CC\_Data

### Data container

**Warning:** All arguments **MUST** be *numpy.ndarray* type for *CC\_Data* for the save to be saveable as an hdf5 file. Set *numpy.unicode* as the **dtype** for the *curve\_uuids* and *labels* arrays. If the **dtype** is 'O' (object) the **to\_hdf5()** method will fail.

```
class mesmerize.analysis.cross_correlation.CC_Data(input_data: Optional[numpy.ndarray] = None,
ccs: Optional[numpy.ndarray] = None,
lag_matrix: Optional[numpy.ndarray] = None,
epsilon_matrix: Optional[numpy.ndarray] =
None, curve_uuids: Optional[numpy.ndarray] =
None, labels: Optional[numpy.ndarray] = None)
```

```
__init__(input_data: Optional[numpy.ndarray] = None, ccs: Optional[numpy.ndarray] = None,
lag_matrix: Optional[numpy.ndarray] = None, epsilon_matrix: Optional[numpy.ndarray] = None,
curve_uuids: Optional[numpy.ndarray] = None, labels: Optional[numpy.ndarray] = None)
```

Object for organizing cross-correlation data

types must be *numpy.ndarray* to be compatible with hdf5

#### Parameters

- **ccs** (*np.ndarray*) – array of cross-correlation functions, shape: [n\_curves, n\_curves, func\_length]
- **lag\_matrix** (*np.ndarray*) – the lag matrix, shape: [n\_curves, n\_curves]
- **epsilon\_matrix** (*np.ndarray*) – the maxima matrix, shape: [n\_curves, n\_curves]
- **curve\_uuids** (*np.ndarray*) – uuids (str representation) for each of the curves, length: n\_curves
- **labels** (*np.ndarray*) – labels for each curve, length: n\_curves

#### ccs

array of cross-correlation functions

#### lag\_matrix

lag matrix

**epsilon\_matrix**

maxima matrix

**curve\_uuids**

uuids for each curve

**labels**

labels for each curve

**get\_threshold\_matrix**(*matrix\_type*: *str*, *lag\_thr*: *float*, *max\_thr*: *float*, *lag\_thr\_abs*: *bool* = *True*) → *numpy.ndarray*

Get lag or maxima matrix with thresholds applied. Values outside the threshold are set to NaN

**Parameters**

- **matrix\_type** – one of ‘lag’ or ‘maxima’
- **lag\_thr** – lag threshold
- **max\_thr** – maxima threshold
- **lag\_thr\_abs** – threshold with the absolute value of lag

**Returns** the requested matrix with the thresholds applied to it.**Return type** *np.ndarray***classmethod from\_dict**(*d*: *dict*)

Load data from a dict

**to\_hdf5**(*path*: *str*)

Save as an HDF5 file

**Parameters** **path** – path to save the hdf5 file to, file must not exist.**classmethod from\_hdf5**(*path*: *str*)

Load cross-correlation data from an hdf5 file

**Parameters** **path** – path to the hdf5 file

### 1.53.3 Clustering metrics

**mesmerize.analysis.clustering\_metrics.get\_centerlike**(*cluster\_members*: *numpy.ndarray*, *metric*: *Optional[Union[str, callable]]* = *None*, *dist\_matrix*: *Optional[numpy.ndarray]* = *None*) → *Tuple[numpy.ndarray, int]*

Finds the 1D time-series within a cluster that is the most centerlike

**Parameters**

- **cluster\_members** – 2D numpy array in the form [n\_samples, 1D time\_series]
- **metric** – Metric to use for pairwise distance calculation, simply passed to `sklearn.metrics.pairwise_distances`
- **dist\_matrix** – Distance matrix of the cluster members

**Returns** The cluster member which is most centerlike, and its index in the *cluster\_members* array

`mesmerize.analysis.clustering_metrics.get_cluster_radius`(*cluster\_members*: *numpy.ndarray*, *metric*: *Optional[Union[str, callable]] = None*, *dist\_matrix*: *Optional[numpy.ndarray] = None*, *centerlike\_index*: *Optional[int] = None*) → *float*

Returns the cluster radius according to chosen distance metric

**Parameters**

- **cluster\_members** – 2D numpy array in the form [n\_samples, 1D time\_series]
- **metric** – Metric to use for pairwise distance calculation, simply passed to `sklearn.metrics.pairwise_distances`
- **dist\_matrix** – Distance matrix of the cluster members
- **centerlike\_index** – Index of the centerlike cluster member within the `cluster_members` array

**Returns** The cluster radius, average between the most centerlike member and all other members

`mesmerize.analysis.clustering_metrics.davies_bouldin_score`(*data*: *numpy.ndarray*, *cluster\_labels*: *numpy.ndarray*, *metric*: *Union[str, callable]*) → *Tuple[float, numpy.ndarray]*

Adopted from `sklearn.metrics.davies_bouldin_score` to use any distance metric

**Parameters**

- **data** – Data that was used for clustering, [n\_samples, 1D time\_series]
- **metric** – Metric to use for pairwise distance calculation, simply passed to `sklearn.metrics.pairwise_distances`
- **cluster\_labels** – Cluster labels

**Returns** Davies Bouldin Score using EMD

## 1.54 Nodes

### 1.54.1 Data

`class mesmerize.pyqtgraphCore.flowchart.library.Data.DropNa(*args, **kwargs)`  
Drop NaNs from the DataFrame

`class mesmerize.pyqtgraphCore.flowchart.library.Data.LoadFile(name)`  
Load Transmission data object from pickled file

`class mesmerize.pyqtgraphCore.flowchart.library.Data.LoadProjDF(name)`  
Load raw project DataFrames as Transmission

`class mesmerize.pyqtgraphCore.flowchart.library.Data.Merge(name)`  
Merge transmissions

`class mesmerize.pyqtgraphCore.flowchart.library.Data.NormRaw(name, ui=None, terminals=None, **kwargs)`  
Normalize between raw min and max values.

`class mesmerize.pyqtgraphCore.flowchart.library.Data.PadArrays(name, ui=None, terminals=None, **kwargs)`  
Pad 1-D numpy arrays in a particular column

---

```

class mesmerize.pyqtgraphCore.flowchart.library.Data.Save(name)
    Save Transmission data object

class mesmerize.pyqtgraphCore.flowchart.library.Data.SelectColumns(name, ui=None,
                                                                    terminals=None, **kwargs)

class mesmerize.pyqtgraphCore.flowchart.library.Data.SelectRows(name, ui=None,
                                                                    terminals=None, **kwargs)

class mesmerize.pyqtgraphCore.flowchart.library.Data.SpliceArrays(name, ui=None,
                                                                    terminals=None, **kwargs)
    Splice 1-D numpy arrays in a particular column.

class mesmerize.pyqtgraphCore.flowchart.library.Data.TextFilter(name, ui=None,
                                                                    terminals=None, **kwargs)
    Simple string filtering in a specified column

class mesmerize.pyqtgraphCore.flowchart.library.Data.ViewHistory(*args, **kwargs)
    View History Trace of the input Transmission

class mesmerize.pyqtgraphCore.flowchart.library.Data.ViewTransmission(name)
    View transmission using the spyder object editor

class mesmerize.pyqtgraphCore.flowchart.library.Data.iloc(name, ui=None, terminals=None,
                                                            **kwargs)
    Pass only one or multiple DataFrame Indices

```

## 1.54.2 Display

```

class mesmerize.pyqtgraphCore.flowchart.library.Display.AnalysisGraph(name)
    Graph of the analysis log

class mesmerize.pyqtgraphCore.flowchart.library.Display.BeeswarmPlots(name)
    Beeswarm and Violin plots

class mesmerize.pyqtgraphCore.flowchart.library.Display.CrossCorr(name)
    Cross Correlation

class mesmerize.pyqtgraphCore.flowchart.library.Display.FrequencyDomainMagnitude(name,
                                                                                      ui=None,
                                                                                      termi-
                                                                                      nals=None,
                                                                                      **kwargs)
    Plot Frequency vs. Frequency Domain Magnitude

class mesmerize.pyqtgraphCore.flowchart.library.Display.Heatmap(name)
    Stack 1-D arrays and plot visually like a heatmap

class mesmerize.pyqtgraphCore.flowchart.library.Display.Plot(name)
    Plot curves and/or scatter points

class mesmerize.pyqtgraphCore.flowchart.library.Display.Proportions(name)
    Plot proportions of one categorical column vs another

class mesmerize.pyqtgraphCore.flowchart.library.Display.ScatterPlot(name)
    Scatter Plot, useful for visualizing transformed data and clusters

class mesmerize.pyqtgraphCore.flowchart.library.Display.SpaceMap(name)
    Visualize spatial maps of a categorical variable

```

**class** mesmerize.pyqtgraphCore.flowchart.library.Display.**Timeseries**(*name*)  
 Seaborn Timeseries plot

### 1.54.3 Signal

**class** mesmerize.pyqtgraphCore.flowchart.library.Signal.**ButterWorth**(*name*, *ui=None*,  
*terminals=None*, *\*\*kwargs*)

Butterworth Filter

**class** mesmerize.pyqtgraphCore.flowchart.library.Signal.**Normalize**(*name*, *ui=None*,  
*terminals=None*, *\*\*kwargs*)

Normalize a column containing 1-D arrays such that values in each array are normalized between 0 and 1

Output Column -> Input Column

**class** mesmerize.pyqtgraphCore.flowchart.library.Signal.**PeakDetect**(*name*, *\*\*kwargs*)  
 Detect peaks & bases by finding local maxima & minima. Use this after the Derivative Filter

**class** mesmerize.pyqtgraphCore.flowchart.library.Signal.**PeakFeatures**(*\*args*, *\*\*kwargs*)  
 Extract peak features after peak detection

**class** mesmerize.pyqtgraphCore.flowchart.library.Signal.**PowerSpectralDensity**(*name*, *ui=None*,  
*terminals=None*, *\*\*kwargs*)

Return the Power Spectral Density of a curve.

**class** mesmerize.pyqtgraphCore.flowchart.library.Signal.**RFFT**(*name*, *ui=None*, *terminals=None*,  
*\*\*kwargs*)

Uses fftpack.rfft, 'Discrete Fourier transform of a real sequence.'

<https://docs.scipy.org/doc/scipy/reference/generated/scipy.fftpack.rfft.html#scipy.fftpack.rfft>

**class** mesmerize.pyqtgraphCore.flowchart.library.Signal.**Resample**(*name*, *ui=None*,  
*terminals=None*, *\*\*kwargs*)

Resample 1D data, uses scipy.signal.resample. "Rs" is the new sampling rate in "Tu" units of time. If "Tu" = 1, then Rs is the new sampling rate in Hertz.

**class** mesmerize.pyqtgraphCore.flowchart.library.Signal.**SavitzkyGolay**(*name*, *ui=None*,  
*terminals=None*, *\*\*kwargs*)

Savitzky-Golay filter.

**class** mesmerize.pyqtgraphCore.flowchart.library.Signal.**ScalerMeanVariance**(*name*, *ui=None*,  
*terminals=None*, *\*\*kwargs*)

Scaler for time series. Scales time series so that their mean (resp. standard deviation) in each dimension is mu (resp. std).

See [https://tslearn.readthedocs.io/en/latest/gen\\_modules/preprocessing/tslearn.preprocessing.TimeSeriesScalerMeanVariance.html#tslearn.preprocessing.TimeSeriesScalerMeanVariance](https://tslearn.readthedocs.io/en/latest/gen_modules/preprocessing/tslearn.preprocessing.TimeSeriesScalerMeanVariance.html#tslearn.preprocessing.TimeSeriesScalerMeanVariance)

**class** mesmerize.pyqtgraphCore.flowchart.library.Signal.**SigmaMAD**(*name*, *ui=None*,  
*terminals=None*, *\*\*kwargs*)

**class** mesmerize.pyqtgraphCore.flowchart.library.Signal.**iRFFT**(*name*, *ui=None*, *terminals=None*,  
*\*\*kwargs*)

Uses fftpack.irfft, 'Return inverse discrete Fourier transform of real sequence.'

<https://docs.scipy.org/doc/scipy/reference/generated/scipy.fftpack.irfft.html#scipy.fftpack.irfft>

Input must have an \_RFFT column from the RFFT node.

### 1.54.4 Math

**class** mesmerize.pyqtgraphCore.flowchart.library.Math.**AbsoluteValue**(*name*, *ui=None*, *terminals=None*, *\*\*kwargs*)

Performs `numpy.abs(<input>)`. Returns root-mean-square value if `<input>` is complex

**class** mesmerize.pyqtgraphCore.flowchart.library.Math.**ArgGroupStat**(*name*, *ui=None*, *terminals=None*, *\*\*kwargs*)

Group by a certain column and return value of another column based on a data column statistic

**class** mesmerize.pyqtgraphCore.flowchart.library.Math.**ArrayStats**(*name*, *ui=None*, *terminals=None*, *\*\*kwargs*)

Perform various statistical functions

**class** mesmerize.pyqtgraphCore.flowchart.library.Math.**Derivative**(*name*, *ui=None*, *terminals=None*, *\*\*kwargs*)

Return the Derivative of a curve.

**class** mesmerize.pyqtgraphCore.flowchart.library.Math.**Integrate**(*name*, *ui=None*, *terminals=None*, *\*\*kwargs*)

**class** mesmerize.pyqtgraphCore.flowchart.library.Math.**LinRegress**(*name*, *ui=None*, *terminals=None*, *\*\*kwargs*)

Linear Regression

**class** mesmerize.pyqtgraphCore.flowchart.library.Math.**LogTransform**(*name*, *ui=None*, *terminals=None*, *\*\*kwargs*)

Can perform various log transforms

**class** mesmerize.pyqtgraphCore.flowchart.library.Math.**TVDiff**(*name*, *ui=None*, *terminals=None*, *\*\*kwargs*)

Total Variation Regularized Numerical Differentiation, Chartrand 2011 method

**class** mesmerize.pyqtgraphCore.flowchart.library.Math.**XpowerY**(*name*, *ui=None*, *terminals=None*, *\*\*kwargs*)

Raise each element of arrays in data column to the exponent Y

**class** mesmerize.pyqtgraphCore.flowchart.library.Math.**ZScore**(*name*, *ui=None*, *terminals=None*, *\*\*kwargs*)

Z-Score the input data. Uses `scipy.stats.zscore`. Computes over sub-DataFrames that are created according to the “group\_by” column parameter

### 1.54.5 Biology

**class** mesmerize.pyqtgraphCore.flowchart.library.Biology.**ExtractStim**(*name*, *ui=None*, *terminals=None*, *\*\*kwargs*)

Extract portions of curves according to stimulus maps

**class** mesmerize.pyqtgraphCore.flowchart.library.Biology.**ManualDFoF**(*name*, *ui=None*, *terminals=None*, *\*\*kwargs*)

Set Fo for dF/Fo using a particular time period. Useful for looking at stimulus responses

**class** mesmerize.pyqtgraphCore.flowchart.library.Biology.**StaticDFoFo**(*name*, *ui=None*, *terminals=None*, *\*\*kwargs*)

Perform  $(F - Fo) / Fo$  without a rolling window to find Fo



**class** mesmerize.pyqtgraphCore.flowchart.library.Biology.**StimTuning**(*name*)  
Get stimulus tuning curves

### 1.54.6 Clustering

**class** mesmerize.pyqtgraphCore.flowchart.library.Clustering.**KMeans**(*name*, *ui=None*,  
*terminals=None*, *\*\*kwargs*)  
KMeans clustering <https://scikit-learn.org/stable/modules/generated/sklearn.cluster.KMeans.html>  
Output column -> KMEANS\_CLUSTER\_<data\_column>

**class** mesmerize.pyqtgraphCore.flowchart.library.Clustering.**KShape**(*name*)  
k-Shape clustering

### 1.54.7 Hierarchical

**class** mesmerize.pyqtgraphCore.flowchart.library.Hierarchical.**FCluster**(*name*, *\*\*kwargs*)  
Basically scipy.cluster.hierarchy.fcluster. Form flat clusters from the hierarchical clustering defined by the given linkage matrix.

**class** mesmerize.pyqtgraphCore.flowchart.library.Hierarchical.**Inconsistent**(*name*)  
Calculate inconsistency statistics on a linkage matrix. Returns inconsistency matrix

**class** mesmerize.pyqtgraphCore.flowchart.library.Hierarchical.**Linkage**(*name*, *ui=None*,  
*terminals=None*, *\*\*kwargs*)  
Basically scipy.cluster.hierarchy.linkage Compute a linkage matrix for Hierarchical clustering

**class** mesmerize.pyqtgraphCore.flowchart.library.Hierarchical.**MaxIncStat**(*name*, *\*\*kwargs*)  
Return the maximum statistic for each non-singleton cluster and its children.

**class** mesmerize.pyqtgraphCore.flowchart.library.Hierarchical.**MaxInconsistent**(*name*,  
*\*\*kwargs*)  
Return the maximum inconsistency coefficient for each non-singleton cluster and its children.

### 1.54.8 Transform

**class** mesmerize.pyqtgraphCore.flowchart.library.Transform.**LDA**(*name*, *\*\*kwargs*)  
Linear Discriminant Analysis, uses sklearn

**class** mesmerize.pyqtgraphCore.flowchart.library.Transform.**Manifold**(*name*, *ui=None*,  
*terminals=None*, *\*\*kwargs*)  
Manifold learning

**class** mesmerize.pyqtgraphCore.flowchart.library.Transform.**NeuralDynamics**(*name*)  
Dimensionality reduction of neuronal dynamics

**class** mesmerize.pyqtgraphCore.flowchart.library.Transform.**PCA**(*name*, *ui=None*, *terminals=None*,  
*\*\*kwargs*)  
Principal component analysis. Uses sklearn.decomposition.PCA

## 1.54.9 CtrlNode

Base for all nodes

```
class mesmerize.pyqtgraphCore.flowchart.library.common.CtrlNode(name, ui=None,  
terminals=None, **kwargs)
```

Abstract class for nodes with auto-generated control UI

### **ctrlWidget()**

Return this Node's control widget.

By default, Nodes have no control widget. Subclasses may reimplement this method to provide a custom widget. This method is called by Flowcharts when they are constructing their Node list.

### **process(\*\*kwargs)**

Process data through this node. This method is called any time the flowchart wants the node to process data. It will be called with one keyword argument corresponding to each input terminal, and must return a dict mapping the name of each output terminal to its new value.

This method is also called with a 'display' keyword argument, which indicates whether the node should update its display (if it implements any) while processing this data. This is primarily used to disable expensive display operations during batch processing.

### **saveState()**

Return a dictionary representing the current state of this node (excluding input / output values). This is used for saving/reloading flowcharts. The default implementation returns this Node's position, bypass state, and information about each of its terminals.

Subclasses may want to extend this method, adding extra keys to the returned dict.

### **restoreState(state)**

Restore the state of this node from a structure previously generated by saveState().

## 1.55 Plotting utils

A few useful helper functions

```
mesmerize.plotting.utils.get_colormap(labels: iter, cmap: str, **kwargs) → collections.OrderedDict
```

Get a dict for mapping labels onto colors

Any kwargs are passed to auto\_colormap()

#### **Parameters**

- **labels** – labels for creating a colormap. Order is maintained if it is a list of unique elements.
- **cmap** – name of colormap

**Returns** dict of labels as keys and colors as values

```
mesmerize.plotting.utils.map_labels_to_colors(labels: iter, cmap: str, **kwargs) → list
```

Map labels onto colors according to chosen colormap

Any kwargs are passed to auto\_colormap()

#### **Parameters**

- **labels** – labels for mapping onto a colormap
- **cmap** – name of colormap

**Returns** list of colors mapped onto the labels

```
mesmerize.plotting.utils.auto_colormap(n_colors: int, cmap: str = 'hsv', output: str = 'mpl', spacing: str =
                                         'uniform', alpha: float = 1.0) →
                                         List[Union[PyQt5.QtGui.QColor, numpy.ndarray, str]]
```

If non-qualitative map: returns list of colors evenly spread through the chosen colormap. If qualitative map: returns subsequent colors from the chosen colormap

#### Parameters

- **n\_colors** – Numbers of colors to return
- **cmap** – name of colormap
- **output** – option: 'mpl' returns RGBA values between 0-1 which matplotlib likes, option: 'pyqt' returns QtGui.QColor instances that correspond to the RGBA values option: 'bokeh' returns hex strings that correspond to the RGBA values which bokeh likes
- **spacing** – option: 'uniform' returns evenly spaced colors across the entire cmap range option: 'subsequent' returns subsequent colors from the cmap
- **alpha** – alpha level, 0.0 - 1.0

**Returns** List of colors as either QColor, numpy.ndarray, or hex str with length n\_colors

```
class mesmerize.plotting.utils.WidgetRegistry
```

Register widgets to conveniently store and restore their states

```
register(widget: PyQt5.QtWidgets.QWidget, setter: callable, getter: callable, name: str)
```

Register a widget. The *setter* and *getter* methods must be interoperable

#### Parameters

- **widget** (*QtWidgets.QWidget*) – widget to register
- **setter** (*callable*) – widget's method to use for setting its value
- **getter** (*callable*) – widget's method to use for getting its value. This value must be settable through the specified "setter" method
- **name** (*str*) – a name for this widget

```
get_state() → dict
```

Get a dict of states for all registered widgets

```
set_state(state: dict)
```

Set all registered widgets from a dict

## 1.56 Plot Bases

### 1.56.1 AbstractBasePlotWidget

```
class mesmerize.plotting.widgets.base._AbstractBasePlotWidget
```

```
abstract property transmission: mesmerize.analysis.data_types.Transmission
```

The input transmission

**Return type** *Transmission*

```
abstract set_input(transmission: mesmerize.analysis.data_types.Transmission)
```

Set the input Transmission with data to plot

**Parameters** **transmission** – Input transmission

**abstract update\_plot**(\*args, \*\*kwargs)

Method that must be used for updating the plot

**abstract get\_plot\_opts**() → dict

Package all necessary plot parameters that in combination with the transmission property are sufficient to restore the plot

**abstract set\_plot\_opts**(opts: dict)

Set plot parameters from a dict in the format returned by get\_plot\_opts()

**abstract save\_plot**(\*args)

Package plot data and plot parameters and save to a file. Must contain all the information that is necessary to restore the plot

**abstract open\_plot**(ptrn\_path: str, proj\_path: str) → Optional[Tuple[str, str]]

Open a plot file and restore the plot

## 1.56.2 BasePlotWidget

Inherit from this to create interactive plots that can be saved and restored.

**class** mesmerize.plotting.widgets.base.**BasePlotWidget**

Bases: *mesmerize.plotting.widgets.base.\_AbstractBasePlotWidget*

Base for plot widgets.

Subclasses must define the class attribute “drop\_opts” which is used to store a list of JSON incompatible keys returned by the get\_plot\_opts() method

**\_\_init\_\_**()

Initialize self. See help(type(self)) for accurate signature.

**block\_signals\_list**

List of QObjects included in dynamic signal blocking. Used for storing plot parameter widgets so that changing all of them quickly (like when restoring a plot) doesn’t cause the plot to constantly update.

**property transmission:** **mesmerize.analysis.data\_types.Transmission**

The input transmission

**Return type** *Transmission*

**set\_input**(transmission: *mesmerize.analysis.data\_types.Transmission*)

Set the input Transmission with data to plot

**Parameters transmission** – Input transmission

**fill\_control\_widget**(data\_columns: list, categorical\_columns: list, uuid\_columns: list)

Method for filling the control widget(s) when inputs are set. Must be implemented in subclass

**update\_plot**(\*args, \*\*kwargs)

Must be implemented in subclass

**get\_plot\_opts**(drop: bool) → dict

Must be implemented in subclass

**set\_plot\_opts**(opts: dict)

Must be implemented in subclass

**classmethod signal\_blocker**(func)

Use as a decorator. Block Qt signals from all QObjects instances in the block\_signals\_list

**save\_plot\_dialog**(path, \*args)

Plot save dialog

**save\_plot**(*path*)

Save the plot as a Transmission in an HDF5 file. Plot parameters are stored as a JSON string within the HDF5 file. See `Transmission.to_hdf5`

**Parameters** **path** – Path to save the file to. For easy identification use “.ptrn” extension.

**open\_plot\_dialog**(*filepath*, *dirpath*, *\*args*, *\*\*kwargs*)

Open plot dialog

**open\_plot**(*ptrn\_path*: *str*, *proj\_path*: *str*) → `Optional[Tuple[str, str]]`

Open a plot saved by the `save_plot()` method

**Parameters**

- **ptrn\_path** – Path to the HDF5 Transmission file. By convention file extension is “.ptrn”
- **proj\_path** – Project path of the associated plot data.

## 1.57 Datapoint Tracer

*User guide*

**class** `mesmerize.plotting.DatapointTracerWidget`

**set\_widget**(*datapoint\_uuid*: *uuid.UUID*, *data\_column\_curve*: *str*, *row*: *pandas.core.series.Series*, *proj\_path*: *str*, *history\_trace*: *Optional[list] = None*, *peak\_ix*: *Optional[int] = None*, *tstart*: *Optional[int] = None*, *tend*: *Optional[int] = None*, *roi\_color*: *Optional[Union[str, float, int, tuple]] = 'ff0000'*, *clear\_linear\_regions*: *bool = True*)

Set the widget from the datapoint.

**Parameters**

- **datapoint\_uuid** – appropriate UUID for the datapoint (such as `uuid_curve` or `_pfeature_uuid`)
- **data\_column\_curve** – data column containing an array to plot
- **row** – DataFrame row that corresponds to the datapoint
- **proj\_path** – root dir of the project the datapoint comes from, used for finding max & std projections
- **history\_trace** – history trace of the datablock the datapoint comes from
- **peak\_ix** – Deprecated
- **tstart** – lower bounds for drawing `LinearRegionItem`
- **tend** – upper bounds for drawing `LinearRegionItem`
- **roi\_color** – color for drawing the spatial bounds of the ROI

**set\_image**(*projection*: *str*)

Set either the max or std projection image

**Parameters** **projection** – one of either ‘max’ or ‘std’

**open\_in\_viewer**()

Open the parent Sample of the current datapoint.

## 1.58 Heatmap

### 1.58.1 Widgets

Higher level widgets that are directly used by the end-user. Both Heatmap widgets use the same plot variant.

#### HeatmapSplitterWidget

Heatmap with a vertical splitter that can be used to house another widget. The plot is compatible with both ‘row’ and ‘item’ selection modes.

```
class mesmerize.plotting.HeatmapSplitterWidget(highlight_mode='row')
```

Widget for interactive heatmaps

```
__init__(highlight_mode='row')
```

**Parameters** **highlight\_mode** – Interactive mode, one of ‘row’ or ‘item’

```
set_data(dataframes: Union[pandas.core.frame.DataFrame, list], data_column: str, labels_column: str,  
cmap: str = 'jet', transmission: Optional[mesmerize.analysis.data_types.Transmission] = None,  
sort: bool = True, reset_sorting: bool = True, **kwargs)
```

Set the data and then set the plot

#### Parameters

- **dataframes** – list of dataframes or a single DataFrame
- **data\_column** – data column of the dataframe that is plotted in the heatmap
- **labels\_column** – dataframe column (usually categorical labels) used to generate the y-labels and legend.
- **cmap** – colormap choice
- **transmission** – transmission object that dataframe originates, used to calculate data units if passed
- **sort** – if False, the sort comboBox is ignored
- **reset\_sorting** – reset the order of the rows in the heatmap
- **kwargs** – Passed to Heatmap.set

```
_set_sort_order(column: str)
```

Set the sort order of the heatmap rows according to a dataframe column. The column must contain categorical values. The rows are grouped together according to the categorical values.

**Parameters** **column** – DataFrame column containing categorical values used for sorting the heatmap rows

```
set_transmission(transmission: mesmerize.analysis.data_types.Transmission)
```

Set the input transmission

```
get_transmission() → mesmerize.analysis.data_types.Transmission
```

Get the input transmission

```
highlight_row(ix: int)
```

Highlight a row on the heatmap

## HeatmapTracerWidget

Heatmap with an embedded *Datapoint Tracer* that can be saved and restored.

**class** mesmerize.plotting.HeatmapTracerWidget

Bases: *mesmerize.plotting.widgets.base.BasePlotWidget*, *mesmerize.plotting.widgets.heatmap.widget.HeatmapSplitterWidget*

Heatmap with an embedded datapoint tracer

**drop\_opts** = ['dataframes', 'transmission']

keys of the plot\_opts dict that are not JSON compatible and not required for restoring this plot

**live\_datapoint\_tracer**

The embedded *Datapoint Tracer* <*API\_DatapointTracer*>

**set\_current\_datapoint**(ix: *tuple*)

Set the currently selected datapoint in the *Datapoint Tracer*.

**Parameters** **ix** – index, (x, y). x is always 0 for this widget since it only uses ‘row’ selection mode and not ‘item’

**get\_plot\_opts**(drop: *bool* = *False*) → *dict*

Get the plot options

**Parameters** **drop** – Drop the non-json compatible objects that are not necessary to restore this plot

**update\_plot**()

Calls set\_data and passes dict from get\_plot\_opts() as keyword arguments

**get\_cluster\_kwargs**() → *dict*

Organize kwargs for visualization of hierarchical clustering

**set\_data**(\*args, *datapoint\_tracer\_curve\_column*: *str* = *None*, \*\*kwargs)

Set the plot data, parameters and draw the plot. If the input Transmission comes directly from the FCluster it will pass a dict from get\_cluster\_kwargs() to the cluster\_kwargs argument. Else it will pass None to cluster\_kwargs.

**Parameters**

- **args** – arguments to pass to superclass set\_data() method
- **datapoint\_tracer\_curve\_column** – Data column containing curves to use in the datapoint tracer
- **kwargs** – keyword arguments, passed to superclass set\_data() method

**property transmission**: *mesmerize.analysis.data\_types.Transmission*

The input transmission

**Return type** *Transmission*

**save\_plot\_dialog**(path, \*args)

Plot save dialog

**save\_plot**(path)

Save the plot as a Transmission in an HDF5 file. Plot parameters are stored as a JSON string within the HDF5 file. See *Transmission.to\_hdf5*

**Parameters** **path** – Path to save the file to. For easy identification use “.ptrn” extension.

**open\_plot\_dialog**(filepath, dirpath, \*args, \*\*kwargs)

Open plot dialog

**open\_plot**(*ptrn\_path: str, proj\_path: str*) → Optional[Tuple[str, str]]  
 Open a plot saved by the save\_plot() method

#### Parameters

- **ptrn\_path** – Path to the HDF5 Transmission file. By convention file extension is “.ptrn”
- **proj\_path** – Project path of the associated plot data.

## 1.58.2 Variant

Lower level widget that handles the actual plotting and user interaction

**class** mesmerize.plotting.variants.**Heatmap**(*highlight\_mode='row'*)  
 Bases: mesmerize.pyqtgraphCore.widgets.MatplotlibWidget.MatplotlibWidget

Heatmap plot variant

#### **sig\_selection\_changed**

Emits indices of data coordinates (x, y) from mouse-click events on the heatmap

**\_\_init\_\_**(*highlight\_mode='row'*)

**Parameters** **highlight\_mode** – The selection mode for the heatmap. One of either ‘row’ or ‘item’

#### **data**

2D numpy array of the heatmap data

#### **selector**

Selection instance that organizes mouse click events on the heatmap

#### **plot**

ClusterGrid object instance containing the plot Axes

**set**(*data: numpy.ndarray, \*args, ylabels: Optional[Union[pandas.core.series.Series, numpy.ndarray, list]] = None, ylabels\_cmap: str = 'tab20', cluster\_kwargs: Optional[dict] = None, \*\*kwargs*)

#### Parameters

- **data** – 2D numpy array
- **args** – Additional args that are passed to sns.heatmap()
- **ylabels** – Labels used to create the ylabels bar
- **ylabels\_cmap** – colormap for the ylabels bar
- **cluster\_kwargs** – keyword arguments for visualizing hierarchical clustering
- **kwargs** – Additional kwargs that are passed to sns.heatmap()

**add\_stimulus\_indicator**(*start: int, end: int, color: str*)

Add lines to indicate the start and end of a stimulus or behavioral period

#### Parameters

- **start** – start index
- **end** – end index
- **color** – line color



## 1.59 KShape

**class** `mesmerize.plotting.KShapeWidget` (*parent=None*)

Bases: `PyQt5.QtWidgets.QMainWindow`, `mesmerize.plotting.widgets.base.BasePlotWidget`

User-end KShape widget

**sig\_output\_changed**

Emits output Transmission containing cluster labels

**drop\_opts = None**

Unused by this plot widget

**property input\_arrays: numpy.ndarray**

The input arrays for clustering

**Returns** 2D array, shape is [num\_samples, padded\_peak\_curve\_length]

**Return type** `np.ndarray`

**property ks: tslearn.clustering.KShape**

tslearn KShape object

**property n\_clusters: int**

Number of clusters

**Return type** `int`

**property train\_data: numpy.ndarray**

The training data for clustering

**Returns** Training data as a 2D array, shape is [n\_samples, padded\_curve\_length]

**Return type** `np.ndarray`

**property y\_pred: numpy.ndarray**

Predicted cluster labels after the model converges

**Returns** 1D array of cluster labels that correspond to the `input_data`

**Return type** `np.ndarray`

**property cluster\_centers: numpy.ndarray**

Cluster centroids

**Returns** 2D array, shape is [n\_clusters, centroid\_array]

**Return type** `np.ndarray`

**property cluster\_means: numpy.ndarray**

The cluster means

**Returns** 2D array, shape is [cluster\_label, mean\_array]

**Return type** `np.ndarray`

**property params: dict**

Parameters dict.

**Return type** `dict`

**set\_input** (*transmission: mesmerize.analysis.data\_types.Transmission*)

Set the input Transmission for the widget

**Parameters** `transmission` – Input Transmission

**pad\_input\_data**(*a*: *numpy.ndarray*, *method*: *str* = 'random') → *numpy.ndarray*

Pad all the input arrays so that are of the same length. The length is determined by the largest input array. The padding value for each input array is the minimum value in that array.

Padding for each input array is either done after the array's last index to fill up to the length of the largest input array (method 'fill-size') or the padding is randomly flanked to the input array (method 'random') for easier visualization.

#### Parameters

- **a** – 1D array of input arrays where each element is a sample array
- **method** – 'fill-size' or 'random'

**Returns** 2D array of the padded arrays in the rows

**start\_process**(\**args*, \*\**kwargs*)

Start the the KShape clustering in a QProcess

**property transmission:** `mesmerize.analysis.data_types.Transmission`

The input transmission

**Return type** *Transmission*

**class** `mesmerize.plotting.widgets.kshape.widget.KShapeMeansPlot`(*parent*)

Bases: `mesmerize.pyqtgraphCore.widgets.MatplotlibWidget.MatplotlibWidget`

Means plots grouped by cluster membership

**axs**

array of axis objects used for drawing the means plots, shape is [nrows, ncols]

**set\_plots**(*input\_arrays*: *numpy.ndarray*, *n\_clusters*: *int*, *y\_pred*: *numpy.ndarray*, *xzero\_pos*: *str*, *error\_band*)

Set the subplots

#### Parameters

- **input\_arrays** – padded input arrays (2D), shape is [num\_samples, padded\_peak\_curve\_length]
- **n\_clusters** – number of clusters
- **y\_pred** – cluster predictions (labels)
- **xzero\_pos** – set the zero position as the 'zero' position of the input array or the 'maxima' of the input array
- **error\_band** – Type of error band to show, one of either 'ci' or 'std'

**class** `mesmerize.plotting.widgets.kshape.widget.KShapePlot`(*parent*)

Bases: `PyQt5.QtWidgets.QDockWidget`

Curves plots, showing a sample of individual curves from a single cluster

**ax**

The Axes object for this plot

**plot**

`MatplotlibWidget()` instance

## 1.60 Proportions

**class** `mesmerize.plotting.ProportionsWidget`

Bases: `mesmerize.plotting.widgets.base.BasePlotWidget`, `mesmerize.pyqtgraphCore.widgets.MatplotlibWidget.MatplotlibWidget`

**drop\_opts** = ['xs', 'ys']

Drop the 'xs' and 'ys' since they are `pd.Series` objects and not required for restoring the plot

**property** `ax`: `matplotlib.axes._axes.Axes`

The Axes object for this plot

**Returns** The Axes object for this plot

**Return type** `AXes`

**get\_plot\_opts**(*drop*: `bool = False`)

Get the plot options

**Parameters** `drop` – Drop the 'xs' and 'ys' objects when saving the returned dict for saving to an hdf5 file

**update\_plot**()

Update the plot data and draw

**export**(\*args, \*\*kwargs)

Export as a csv file

**property** `transmission`: `mesmerize.analysis.data_types.Transmission`

The input transmission

**Return type** `Transmission`

**save\_plot\_dialog**(*path*, \*args)

Plot save dialog

**save\_plot**(*path*)

Save the plot as a `Transmission` in an HDF5 file. Plot parameters are stored as a JSON string within the HDF5 file. See `Transmission.to_hdf5`

**Parameters** `path` – Path to save the file to. For easy identification use “.ptrn” extension.

**open\_plot\_dialog**(*filepath*, *dirpath*, \*args, \*\*kwargs)

Open plot dialog

**open\_plot**(*ptrn\_path*: `str`, *proj\_path*: `str`) → `Optional[Tuple[str, str]]`

Open a plot saved by the `save_plot()` method

**Parameters**

- **ptrn\_path** – Path to the HDF5 `Transmission` file. By convention file extension is “.ptrn”
- **proj\_path** – Project path of the associated plot data.

## 1.61 Scatter Plot

### 1.61.1 ScatterPlotWidget

Higher level widget that is directly used by the end-user. Scatter plot with docked Control Widget, *Datapoint Tracer*, and Console.

**class** `mesmerize.plotting.ScatterPlotWidget`

Bases: `PyQt5.QtWidgets.QMainWindow`, `mesmerize.plotting.widgets.base.BasePlotWidget`

**live\_datapoint\_tracer**

Instance of *DatapointTracer*

**set\_update\_live**(*b: bool*)

Must be implemented in subclass

**set\_input**(\*args, \*\*kws)

Set the input Transmission with data to plot

**Parameters transmission** – Input transmission

**get\_plot\_opts**(*drop: bool = False*) → dict

Get the plot options

**Parameters drop** – no drop opts are specified for this plot

**set\_plot\_opts**(\*args, \*\*kws)

Must be implemented in subclass

**update\_plot**()

Update the plot data and draw

**set\_current\_datapoint**(*identifier: uuid.UUID*)

Set the UUID of the current datapoint and update the Datapoint Tracer

**property transmission:** `mesmerize.analysis.data_types.Transmission`

The input transmission

**Return type** *Transmission*

**save\_plot\_dialog**(*path, \*args*)

Plot save dialog

**save\_plot**(*path*)

Save the plot as a Transmission in an HDF5 file. Plot parameters are stored as a JSON string within the HDF5 file. See `Transmission.to_hdf5`

**Parameters path** – Path to save the file to. For easy identification use “.ptrn” extension.

**open\_plot\_dialog**(*filepath, dirpath, \*args, \*\*kwargs*)

Open plot dialog

**open\_plot**(*ptrn\_path: str, proj\_path: str*) → Optional[Tuple[str, str]]

Open a plot saved by the `save_plot()` method

**Parameters**

- **ptrn\_path** – Path to the HDF5 Transmission file. By convention file extension is “.ptrn”
- **proj\_path** – Project path of the associated plot data.

## 1.61.2 Variant

Lower level widget that interfaces with `pqytgraph.ScatterPlotItem` and has some helper methods.

```
class mesmerize.plotting.variants.PgScatterPlot(graphics_view: mesmerize.pyqtgraphCore.widgets.GraphicsLayoutWidget.GraphicsLayoutWidget, parent=None)
```

Bases: `PyQt5.QtCore.QObject`

### **signal\_spot\_clicked**

Emits the UUID of a spot when it is clicked

```
__init__(graphics_view: mesmerize.pyqtgraphCore.widgets.GraphicsLayoutWidget.GraphicsLayoutWidget, parent=None)
```

**Parameters** `graphics_view` – This plot will instantiate within this `GraphicsLayoutWidget`

```
add_data(xs: numpy.ndarray, ys: numpy.ndarray, uuid_series: pandas.core.series.Series, color: Union[str, PyQt5.QtGui.QColor, PyQt5.QtGui.QBrush, List[Union[PyQt5.QtGui.QBrush, PyQt5.QtGui.QColor, str]]], size: int = 10, **kwargs)
```

Add data to the plot

### **Parameters**

- **xs** (`np.ndarray`) – array of x values, indices must correspond to the “ys” array
- **ys** (`np.ndarray`) – array of y values, indices must correspond to the “xs” array
- **uuid\_series** (`pd.Series`) – series of UUID values. Each `SpotItem` on the plot is tagged with these UUIDs, therefore the indices must correspond to the “xs” and “ys” arrays.
- **color** (`Union[str, QtGui.QColor, QtGui.QBrush, List[Union[QtGui.QBrush, QtGui.QColor, str]]]`) – Either a single color or list of colors that `pqytgraph.fn.mkBrush()` can accept
- **size** (`int`) – spot size
- **kwargs** – any additional kwargs that are passed to `ScatterPlotItem.addPoints()`

```
_clicked(plot, points)
```

Called when the plot is clicked

```
set_legend(colors: dict, shapes: Optional[dict] = None)
```

Set the legend.

### **Parameters**

- **colors** (`Dict[str, Union[QtGui.QColor, QtGui.QBrush, str]]`) – dict mapping of labels onto their corresponding colors {‘label’: `QtGui.QColor`}
- **shapes** (`Dict[str, str]`) – dict mapping of labels onto their corresponding shapes {‘label’: <shape as a str>}

```
clear_legend()
```

Clear the legend

```
clear()
```

Clear the plot

## 1.62 SpaceMap

**class** `mesmerize.plotting.SpaceMapWidget`

Bases: `PyQt5.QtWidgets.QMainWindow`, `mesmerize.plotting.widgets.base.BasePlotWidget`

**sample\_df**

sub-dataframe of the current sample

**update\_plot**(\*args, \*\*kwargs)

Must be implemented in subclass

**property transmission:** `mesmerize.analysis.data_types.Transmission`

The input transmission

**Return type** *Transmission*

**get\_plot\_opts**(drop: bool = False) → dict

Must be implemented in subclass

**save\_plot\_dialog**(path, \*args)

Plot save dialog

**save\_plot**(path)

Save the plot as a Transmission in an HDF5 file. Plot parameters are stored as a JSON string within the HDF5 file. See `Transmission.to_hdf5`

**Parameters** `path` – Path to save the file to. For easy identification use “.ptrn” extension.

**open\_plot\_dialog**(filepath, dirpath, \*args, \*\*kwargs)

Open plot dialog

**open\_plot**(ptrn\_path: str, proj\_path: str) → Optional[Tuple[str, str]]

Open a plot saved by the `save_plot()` method

**Parameters**

- **ptrn\_path** – Path to the HDF5 Transmission file. By convention file extension is “.ptrn”
- **proj\_path** – Project path of the associated plot data.

**set\_plot\_opts**(\*args, \*\*kwargs)

Must be implemented in subclass



## INDICES AND TABLES

- genindex
- modindex
- search





## PYTHON MODULE INDEX

### m

- mesmerize.analysis.clustering\_metrics, 215
- mesmerize.analysis.math.cross\_correlation,  
212
- mesmerize.analysis.utils, 210
- mesmerize.common, 166
- mesmerize.common.qdialogs, 168
- mesmerize.common.utils, 166
- mesmerize.pyqtgraphCore.flowchart.library.Biology,  
219
- mesmerize.pyqtgraphCore.flowchart.library.Clustering,  
220
- mesmerize.pyqtgraphCore.flowchart.library.Data,  
216
- mesmerize.pyqtgraphCore.flowchart.library.Display,  
217
- mesmerize.pyqtgraphCore.flowchart.library.Hierarchical,  
220
- mesmerize.pyqtgraphCore.flowchart.library.Math,  
219
- mesmerize.pyqtgraphCore.flowchart.library.Signal,  
218
- mesmerize.pyqtgraphCore.flowchart.library.Transform,  
220



## Symbols

\_\_delitem\_\_() (mesmerize.viewer.modules.roi\_manager\_modules.managers.AbstractBaseManager method), 181  
 \_\_delitem\_\_() (mesmerize.viewer.modules.roi\_manager\_modules.roi\_list.ROIList method), 185  
 \_\_getitem\_\_() (mesmerize.viewer.modules.roi\_manager\_modules.roi\_list.ROIList method), 185  
 \_\_init\_\_() (mesmerize.Transmission method), 201  
 \_\_init\_\_() (mesmerize.analysis.cross\_correlation.CC\_Data method), 214  
 \_\_init\_\_() (mesmerize.analysis.data\_types.HistoryTrace method), 204  
 \_\_init\_\_() (mesmerize.plotting.HeatmapSplitterWidget method), 225  
 \_\_init\_\_() (mesmerize.plotting.variants.Heatmap method), 227  
 \_\_init\_\_() (mesmerize.plotting.variants.PgScatterPlot method), 232  
 \_\_init\_\_() (mesmerize.plotting.widgets.base.BasePlotWidget method), 223  
 \_\_init\_\_() (mesmerize.viewer.core.ViewerUtils method), 171  
 \_\_init\_\_() (mesmerize.viewer.core.ViewerWorkEnv method), 169  
 \_\_init\_\_() (mesmerize.viewer.core.data\_types.ImgData method), 171  
 \_\_init\_\_() (mesmerize.viewer.core.mesfile.MES method), 172  
 \_\_init\_\_() (mesmerize.viewer.modules.batch\_manager.ModuleGUI method), 175  
 \_\_init\_\_() (mesmerize.viewer.modules.roi\_manager.ModuleGUI method), 180  
 \_\_init\_\_() (mesmerize.viewer.modules.roi\_manager\_modules.managers.AbstractBaseManager method), 181  
 \_\_init\_\_() (mesmerize.viewer.modules.roi\_manager\_modules.managers.AbstractBaseManager method), 184  
 \_\_init\_\_() (mesmerize.viewer.modules.roi\_manager\_modules.managers.AbstractBaseManager method), 181  
 \_\_init\_\_() (mesmerize.viewer.modules.roi\_manager\_modules.managers.AbstractBaseManager method), 182  
 \_\_init\_\_() (mesmerize.viewer.modules.roi\_manager\_modules.managers.AbstractBaseManager method), 183  
 \_\_init\_\_() (mesmerize.viewer.modules.roi\_manager\_modules.roi\_list.ROIList method), 185  
 \_\_init\_\_() (mesmerize.viewer.modules.roi\_manager\_modules.roi\_types.ROIList method), 188  
 \_\_init\_\_() (mesmerize.viewer.modules.roi\_manager\_modules.roi\_types.ROIList method), 197  
 \_\_init\_\_() (mesmerize.viewer.modules.roi\_manager\_modules.roi\_types.ROIList method), 190  
 \_\_init\_\_() (mesmerize.viewer.modules.roi\_manager\_modules.roi\_types.ROIList method), 192  
 \_\_init\_\_() (mesmerize.viewer.modules.roi\_manager\_modules.roi\_types.ROIList method), 192  
 \_\_init\_\_() (mesmerize.viewer.modules.roi\_manager\_modules.roi\_types.ROIList method), 194  
 \_\_init\_\_() (mesmerize.viewer.modules.roi\_manager\_modules.roi\_types.ROIList method), 186  
 \_\_weakref\_\_ (mesmerize.viewer.core.ViewerWorkEnv attribute), 169  
 \_\_weakref\_\_ (mesmerize.viewer.core.mesfile.MES attribute), 172  
 \_\_weakref\_\_ (mesmerize.viewer.modules.roi\_manager\_modules.managers.AbstractBaseManager attribute), 181  
 \_\_weakref\_\_ (mesmerize.viewer.modules.roi\_manager\_modules.roi\_list.ROIList attribute), 186  
 \_\_weakref\_\_ (mesmerize.viewer.modules.roi\_manager\_modules.roi\_types.ROIList attribute), 188  
 \_\_add\_data\_block\_\_() (mesmerize.analysis.data\_types.HistoryTrace method), 204  
 clear\_workEnv() (mesmerize.viewer.core.ViewerUtils method), 171

method), 172

`_clicked()` (*mesmerize.plotting.variants.PgScatterPlot* method), 232

`_hide_all_graphics_objects()` (*mesmerize.viewer.modules.roi\_manager\_modules.roi\_list.ROIList* method), 186

`_hide_graphics_object()` (*mesmerize.viewer.modules.roi\_manager\_modules.roi\_list.ROIList* method), 186

`_load_files()` (*mesmerize.Transmission* static method), 203

`_organize_meta()` (*mesmerize.viewer.core.ViewerWorkEnv* static method), 170

`_reindex_list_widget()` (*mesmerize.viewer.modules.roi\_manager\_modules.roi\_list.ROIList* method), 185

`_set_sort_order()` (*mesmerize.plotting.HeatmapSplitterWidget* method), 225

`_show_all_graphics_objects()` (*mesmerize.viewer.modules.roi\_manager\_modules.roi\_list.ROIList* method), 186

`_show_graphics_object()` (*mesmerize.viewer.modules.roi\_manager\_modules.roi\_list.ROIList* method), 186

`_to_uuid()` (*mesmerize.analysis.data\_types.HistoryTrace* static method), 205

**A**

`AbsoluteValue` (class in *mesmerize.pyqtgraphCore.flowchart.library.Math*), 219

`AbstractBaseManager` (class in *mesmerize.viewer.modules.roi\_manager\_modules.managers*), 181

`add_all_components()` (*mesmerize.viewer.modules.roi\_manager\_modules.managers.Manager* method), 184

`add_all_components()` (*mesmerize.viewer.modules.roi\_manager\_modules.managers.Manager* method), 183

`add_data()` (*mesmerize.plotting.variants.PgScatterPlot* method), 232

`add_item()` (*mesmerize.viewer.modules.batch\_manager.ModuleGUI* method), 175

`add_manual_roi()` (*mesmerize.viewer.modules.roi\_manager.ModuleGUI* method), 180

`add_operation()` (*mesmerize.analysis.data\_types.HistoryTrace* method), 204

`add_roi()` (*mesmerize.viewer.modules.roi\_manager\_modules.managers.Manager* method), 181

`add_roi()` (*mesmerize.viewer.modules.roi\_manager\_modules.managers.Manager* method), 184

`add_roi()` (*mesmerize.viewer.modules.roi\_manager\_modules.managers.Manager* method), 182

`add_roi()` (*mesmerize.viewer.modules.roi\_manager\_modules.managers.Manager* method), 182

`add_roi()` (*mesmerize.viewer.modules.roi\_manager\_modules.managers.Manager* method), 184

`add_row()` (*mesmerize.viewer.modules.stimmap\_modules.page.Page* method), 199

`add_stimulus_indicator()` (*mesmerize.plotting.variants.Heatmap* method), 227

`add_to_batch()` (*mesmerize.viewer.modules.cnmf.ModuleGUI* method), 177

`add_to_batch_cnmfe()` (*mesmerize.viewer.modules.cnmfe.ModuleGUI* method), 178

`add_to_batch_corr_pnr()` (*mesmerize.viewer.modules.cnmfe.ModuleGUI* method), 177

`add_to_batch_elas_corr()` (*mesmerize.viewer.modules.caiman\_motion\_correction.ModuleGUI* method), 177

`add_viewer()` (*mesmerize.viewer.modules.roi\_manager\_modules.roi\_types.AbstractBaseManager* method), 188

`add_to_viewer()` (*mesmerize.viewer.modules.roi\_manager\_modules.roi\_types.BaseROI* method), 189

`add_to_viewer()` (*mesmerize.viewer.modules.roi\_manager\_modules.roi\_types.CNMROI* method), 197

`add_to_viewer()` (*mesmerize.viewer.modules.roi\_manager\_modules.roi\_types.ManualROI* method), 191

`add_to_viewer()` (*mesmerize.viewer.modules.roi\_manager\_modules.roi\_types.ScatterROI* method), 193

`add_to_viewer()` (*mesmerize.viewer.modules.roi\_manager\_modules.roi\_types.VolCNMF* method), 195

`AnalysisGraph` (class in *mesmerize.pyqtgraphCore.flowchart.library.Display*), 217

`append()` (*mesmerize.viewer.modules.roi\_manager\_modules.roi\_list.ROIList* method), 185

`ArgGroupStat` (class in *mesmerize.pyqtgraphCore.flowchart.library.Math*), 219

`ArrayStats` (class in *mesmerize.pyqtgraphCore.flowchart.library.Math*), 219

`auto_colormap()` (in module *mesmerize.plotting.utils*), 219

- 221
- `ax` (*mesmerize.plotting.ProportionsWidget* property), 230
- `ax` (*mesmerize.plotting.widgets.kshape.widget.KShapePlot* attribute), 229
- `axs` (*mesmerize.plotting.widgets.kshape.widget.KShapeMeansPlot* attribute), 229
- ## B
- `BasePlotWidget` (class in *mesmerize.plotting.widgets.base*), 223
- `BaseROI` (class in *mesmerize.viewer.modules.roi\_manager\_modules.roi\_types*), 188
- `BeeswarmPlots` (class in *mesmerize.pyqtgraphCore.flowchart.library.Display*), 217
- `block_signals_list` (*mesmerize.plotting.widgets.base.BasePlotWidget* attribute), 223
- `ButterWorth` (class in *mesmerize.pyqtgraphCore.flowchart.library.Signal*), 218
- ## C
- `CC_Data` (class in *mesmerize.analysis.cross\_correlation*), 214
- `ccs` (*mesmerize.analysis.cross\_correlation.CC\_Data* attribute), 214
- `channel` (*mesmerize.viewer.modules.femtonics\_mesc.MEScNavigator* attribute), 179
- `channels` (*mesmerize.viewer.modules.femtonics\_mesc.MEScNavigator* attribute), 179
- `check_meta_path()` (*mesmerize.viewer.modules.tiff\_io.ModuleGUI* method), 176
- `check_operation_exists()` (*mesmerize.analysis.data\_types.HistoryTrace* method), 205
- `clean_history_trace()` (*mesmerize.analysis.data\_types.HistoryTrace* static method), 206
- `clear()` (*mesmerize.plotting.variants.PgScatterPlot* method), 232
- `clear()` (*mesmerize.viewer.core.ViewerWorkEnv* method), 170
- `clear()` (*mesmerize.viewer.modules.roi\_manager\_modules.managers.AbstractBaseManager* method), 181
- `clear()` (*mesmerize.viewer.modules.stimmap\_modules.page.Page* method), 199
- `clear_()` (*mesmerize.viewer.modules.roi\_manager\_modules.roi\_list.ROIList* method), 185
- `clear_legend()` (*mesmerize.plotting.variants.PgScatterPlot* method), 232
- `close_file()` (*mesmerize.viewer.modules.femtonics\_mesc.MEScNavigator* method), 179
- `close_file()` (*mesmerize.viewer.modules.femtonics\_mesc.ModuleGUI* method), 178
- `cluster_centers` (*mesmerize.plotting.KShapeWidget* property), 228
- `cluster_means` (*mesmerize.plotting.KShapeWidget* property), 228
- `CNMFROI` (class in *mesmerize.viewer.modules.roi\_manager\_modules.roi\_types*), 196
- `compute_cc_data()` (in module *mesmerize.analysis.math.cross\_correlation*), 213
- `compute_ccs()` (in module *mesmerize.analysis.math.cross\_correlation*), 214
- `create_data_block()` (*mesmerize.analysis.data\_types.HistoryTrace* method), 204
- `create_roi_list()` (*mesmerize.viewer.modules.roi\_manager\_modules.managers.ManagerCNI* method), 184
- `create_roi_list()` (*mesmerize.viewer.modules.roi\_manager\_modules.managers.ManagerMa* method), 182
- `create_roi_list()` (*mesmerize.viewer.modules.roi\_manager\_modules.managers.ManagerSc* method), 183
- `create_roi_list()` (*mesmerize.viewer.modules.roi\_manager\_modules.managers.ManagerVol* method), 183
- `create_roi_list()` (*mesmerize.viewer.modules.roi\_manager\_modules.managers.ManagerVol* method), 183
- `CrossCorr` (class in *mesmerize.pyqtgraphCore.flowchart.library.Display*), 217
- `CtrlNode` (class in *mesmerize.pyqtgraphCore.flowchart.library.common*), 221
- `ctrlWidget()` (*mesmerize.pyqtgraphCore.flowchart.library.common.CtrlNode* method), 221
- `current_index` (*mesmerize.viewer.modules.roi\_manager\_modules.roi\_list.ROIList* attribute), 185
- `curve_data` (*mesmerize.viewer.modules.roi\_manager\_modules.roi\_types.M* property), 190
- `curve_uids` (*mesmerize.analysis.cross\_correlation.CC\_Data* attribute), 215

## D

`data` (*mesmerize.plotting.variants.Heatmap* attribute), 227

`data_blocks` (*mesmerize.analysis.data\_types.HistoryTrace* property), 204

`DatapointTracerWidget` (class in *mesmerize.plotting*), 224

`davies_bouldin_score()` (in module *mesmerize.analysis.clustering\_metrics*), 216

`del_item()` (*mesmerize.viewer.modules.batch\_manager.ModuleGUI* method), 175

`delete_row()` (*mesmerize.viewer.modules.stimmap\_modules.page.Page* method), 199

`Derivative` (class in *mesmerize.pyqtgraphCore.flowchart.library.Math*), 219

`df` (*mesmerize.viewer.modules.batch\_manager.ModuleGUI* attribute), 175

`discard_workEnv()` (*mesmerize.viewer.core.ViewerUtils* method), 172

`disconnect_all()` (*mesmerize.viewer.modules.roi\_manager\_modules.roi\_list.ROIList* method), 185

`draw_graph()` (in module *mesmerize.common.utils*), 167

`draw_graph()` (*mesmerize.analysis.data\_types.HistoryTrace* method), 206

`drop_opts` (*mesmerize.plotting.HeatmapTracerWidget* attribute), 226

`drop_opts` (*mesmerize.plotting.KShapeWidget* attribute), 228

`drop_opts` (*mesmerize.plotting.ProportionsWidget* attribute), 230

`DropNa` (class in *mesmerize.pyqtgraphCore.flowchart.library.Data*), 216

## E

`empty_df()` (*mesmerize.Transmission* static method), 202

`epsilon_matrix` (*mesmerize.analysis.cross\_correlation.CC\_Data* attribute), 214

`eventFilter()` (*mesmerize.viewer.modules.roi\_manager.ModuleGUI* method), 180

`exceptions_label()` (in module *mesmerize.common.qdialogs*), 168

`export()` (*mesmerize.plotting.ProportionsWidget* method), 230

`ExtractStim` (class in *mesmerize.pyqtgraphCore.flowchart.library.Biology*),

219

## F

`FCluster` (class in *mesmerize.pyqtgraphCore.flowchart.library.Hierarchical*), 220

`file` (*mesmerize.viewer.modules.femtonics\_mesc.MEScNavigator* attribute), 178

`fill_control_widget()` (*mesmerize.plotting.widgets.base.BasePlotWidget* method), 223

`FrequencyDomainMagnitude` (class in *mesmerize.pyqtgraphCore.flowchart.library.Display*), 217

`from_dict()` (*mesmerize.analysis.cross\_correlation.CC\_Data* class method), 215

`from_dict()` (*mesmerize.analysis.data\_types.HistoryTrace* static method), 205

`from_hdf5()` (*mesmerize.analysis.cross\_correlation.CC\_Data* class method), 215

`from_hdf5()` (*mesmerize.Transmission* class method), 202

`from_json()` (*mesmerize.analysis.data\_types.HistoryTrace* class method), 205

`from_mesfile()` (*mesmerize.viewer.core.ViewerWorkEnv* class method), 170

`from_pickle()` (*mesmerize.analysis.data\_types.HistoryTrace* class method), 206

`from_pickle()` (*mesmerize.Transmission* class method), 202

`from_pickle()` (*mesmerize.viewer.core.ViewerWorkEnv* class method), 170

`from_proj()` (*mesmerize.Transmission* class method), 202

`from_state()` (*mesmerize.viewer.modules.roi\_manager\_modules.roi\_types.\_AbstractBaseROI* class method), 188

`from_state()` (*mesmerize.viewer.modules.roi\_manager\_modules.roi\_types.BaseROI* class method), 189

`from_state()` (*mesmerize.viewer.modules.roi\_manager\_modules.roi\_types.CNMROI* class method), 197

`from_state()` (*mesmerize.viewer.modules.roi\_manager\_modules.roi\_types.ManualROI* class method), 190

`from_state()` (*mesmerize* class method), 190





|                                                                                                                              |                                                                                                            |
|------------------------------------------------------------------------------------------------------------------------------|------------------------------------------------------------------------------------------------------------|
| <code>get_params()</code> (177) (mesmerize.viewer.modules.cnmfe.ModuleGUI method), 177                                       | <code>get_state()</code> (mesmerize.plotting.utils.WidgetRegistry method), 222                             |
| <code>get_plot_item()</code> (mesmerize.viewer.modules.roi_manager_modules.managers.AbstractBaseManager method), 181         | <code>get_sys_config()</code> (in module mesmerize.common), 166                                            |
| <code>get_plot_opts()</code> (mesmerize.plotting.HeatmapTracerWidget method), 226                                            | <code>get_tag()</code> (mesmerize.viewer.modules.roi_manager_modules.roi_types.ABaseROI method), 187       |
| <code>get_plot_opts()</code> (mesmerize.plotting.ProportionsWidget method), 230                                              | <code>get_tag()</code> (mesmerize.viewer.modules.roi_manager_modules.roi_types.BaseROI method), 189        |
| <code>get_plot_opts()</code> (mesmerize.plotting.ScatterPlotWidget method), 231                                              | <code>get_tag()</code> (mesmerize.viewer.modules.roi_manager_modules.roi_types.ClusteringROI method), 197  |
| <code>get_plot_opts()</code> (mesmerize.plotting.SpaceMapWidget method), 233                                                 | <code>get_tag()</code> (mesmerize.viewer.modules.roi_manager_modules.roi_types.MultiplexROI method), 191   |
| <code>get_plot_opts()</code> (mesmerize.plotting.widgets.base._AbstractBasePlotWidget method), 223                           | <code>get_tag()</code> (mesmerize.viewer.modules.roi_manager_modules.roi_types.ScatterROI method), 193     |
| <code>get_plot_opts()</code> (mesmerize.plotting.widgets.base.BasePlotWidget method), 223                                    | <code>get_tag()</code> (mesmerize.viewer.modules.roi_manager_modules.roi_types.VolGMMF method), 195        |
| <code>get_proj_config()</code> (in module mesmerize.common), 166                                                             | <code>get_threshold_matrix()</code> (mesmerize.analysis.cross_correlation.CC_Data method), 215             |
| <code>get_proj_path()</code> (mesmerize.Transmission method), 202                                                            | <code>get_transmission()</code> (mesmerize.plotting.HeatmapSplitterWidget method), 225                     |
| <code>get_project_manager()</code> (in module mesmerize.common), 166                                                         | <code>get_units()</code> (mesmerize.viewer.modules.stimmap_modules.page.Page method), 199                  |
| <code>get_proportions()</code> (in module mesmerize.analysis.utils), 211                                                     | <code>get_window_manager()</code> (in module mesmerize.common), 166                                        |
| <code>get_roi_graphics_object()</code> (mesmerize.viewer.modules.roi_manager_modules.roi_types._AbstractBaseROI method), 187 | <b>H</b>                                                                                                   |
| <code>get_roi_graphics_object()</code> (mesmerize.viewer.modules.roi_manager_modules.roi_types.BaseROI method), 188          | <code>HdfTools</code> (class in mesmerize.common.utils), 166                                               |
| <code>get_roi_graphics_object()</code> (mesmerize.viewer.modules.roi_manager_modules.roi_types.GMMFROI method), 196          | <code>Heatmap</code> (class in mesmerize.plotting.variants), 227                                           |
| <code>get_roi_graphics_object()</code> (mesmerize.viewer.modules.roi_manager_modules.roi_types.ManualROI method), 190        | <code>Heatmap</code> (class in mesmerize.pyqtgraph.Core.flowchart.library.Display), 217                    |
| <code>get_roi_graphics_object()</code> (mesmerize.viewer.modules.roi_manager_modules.roi_types.ScatterROI method), 192       | <code>HeatmapSplitterWidget</code> (class in mesmerize.plotting), 225                                      |
| <code>get_roi_graphics_object()</code> (mesmerize.viewer.modules.roi_manager_modules.roi_types.VolGMMF method), 194          | <code>HeatmapTracerWidget</code> (class in mesmerize.plotting), 226                                        |
| <code>get_sampling_rate()</code> (in module mesmerize.analysis.utils), 211                                                   | <code>highlight_curve()</code> (mesmerize.viewer.modules.roi_manager_modules.roi_list.ROIList method), 186 |
| <code>get_selected_items()</code> (mesmerize.viewer.modules.batch_manager.ModuleGUI method), 175                             | <code>highlight_roi()</code> (mesmerize.viewer.modules.roi_manager_modules.roi_list.ROIList method), 185   |
|                                                                                                                              | <code>highlight_row()</code> (mesmerize.plotting.HeatmapSplitterWidget method), 225                        |
|                                                                                                                              | <code>history</code> (mesmerize.analysis.data_types.HistoryTrace property), 204                            |
|                                                                                                                              | <code>history_trace</code> (mesmerize.viewer.core.ViewerWorkEnv attribute), 170                            |
|                                                                                                                              | <code>HistoryTrace</code> (class in mesmerize.analysis.data_types), 203                                    |

- I**
- `iloc` (class in `mesmerize.pyqtgraphCore.flowchart.library.Data`), 217
  - `ImgData` (class in `mesmerize.viewer.core.data_types`), 171
  - `imgdata` (`mesmerize.viewer.core.ViewerWorkEnv` attribute), 170
  - `import_from_imagej()` (`mesmerize.viewer.modules.roi_manager.ModuleGUI` method), 180
  - `import_from_imagej()` (`mesmerize.viewer.modules.roi_manager_modules.managers.ManagerMath` method), 182
  - `import_recording()` (`mesmerize.viewer.modules.femtonics_mesc.ModuleGUI` method), 178
  - `Inconsistent` (class in `mesmerize.pyqtgraphCore.flowchart.library.Hierarchical`), 220
  - `input_arrays` (`mesmerize.plotting.KShapeWidget` property), 228
  - `Integrate` (class in `mesmerize.pyqtgraphCore.flowchart.library.Math`), 219
  - `iRFFT` (class in `mesmerize.pyqtgraphCore.flowchart.library.Signal`), 218
  - `is_empty()` (`mesmerize.viewer.modules.roi_manager_modules.managers.ManagerMath` method), 181
  - `isEmpty` (`mesmerize.viewer.core.ViewerWorkEnv` attribute), 170
- K**
- `KMeans` (class in `mesmerize.pyqtgraphCore.flowchart.library.Clustering`), 220
  - `ks` (`mesmerize.plotting.KShapeWidget` property), 228
  - `KShape` (class in `mesmerize.pyqtgraphCore.flowchart.library.Clustering`), 220
  - `KShapeMeansPlot` (class in `mesmerize.plotting.widgets.kshape.widget`), 229
  - `KShapePlot` (class in `mesmerize.plotting.widgets.kshape.widget`), 229
  - `KShapeWidget` (class in `mesmerize.plotting`), 228
- L**
- `labels` (`mesmerize.analysis.cross_correlation.CC_Data` attribute), 215
  - `lag_matrix` (`mesmerize.analysis.cross_correlation.CC_Data` attribute), 214
  - `LDA` (class in `mesmerize.pyqtgraphCore.flowchart.library.Transform`), 220
  - `Linkage` (class in `mesmerize.pyqtgraphCore.flowchart.library.Hierarchical`), 220
  - `LinRegress` (class in `mesmerize.pyqtgraphCore.flowchart.library.Math`), 219
  - `list_widget` (`mesmerize.viewer.modules.roi_manager_modules.roi_list.ROIList` attribute), 185
  - `list_widget_tags` (`mesmerize.viewer.modules.roi_manager_modules.roi_list.ROIList` attribute), 185
  - `listw_channels` (`mesmerize.viewer.modules.femtonics_mesc.MEScNavigator` attribute), 179
  - `listw_sessions` (`mesmerize.viewer.modules.femtonics_mesc.MEScNavigator` attribute), 179
  - `listw_units` (`mesmerize.viewer.modules.femtonics_mesc.MEScNavigator` attribute), 179
  - `live_datapoint_tracer` (`mesmerize.plotting.HeatmapTracerWidget` attribute), 226
  - `live_datapoint_tracer` (`mesmerize.plotting.ScatterPlotWidget` attribute), 231
  - `load()` (`mesmerize.viewer.modules.tiff_io.ModuleGUI` method), 176
  - `load_dataframe()` (`mesmerize.common.utils.HdfTools` static method), 167
  - `load_dict()` (`mesmerize.common.utils.HdfTools` static method), 167
  - `load_img()` (`mesmerize.viewer.core.mesfile.MES` method), 172
  - `load_item_input()` (`mesmerize.viewer.modules.batch_manager.ModuleGUI` method), 175
  - `load_item_output()` (`mesmerize.viewer.modules.batch_manager.ModuleGUI` method), 176
  - `load_mesfile()` (`mesmerize.viewer.core.ViewerWorkEnv` static method), 170
  - `LoadFile` (class in `mesmerize.pyqtgraphCore.flowchart.library.Data`), 216
  - `LoadProjDF` (class in `mesmerize.pyqtgraphCore.flowchart.library.Data`), 216
  - `LogTransform` (class in `mesmerize.pyqtgraphCore.flowchart.library.Transform`), 220

|                                                                                                                 |                                                                               |
|-----------------------------------------------------------------------------------------------------------------|-------------------------------------------------------------------------------|
| <i>ize.pyqtgraphCore.flowchart.library.Math</i> ),<br>219                                                       | MEScNavigator (class in <i>mesmerize.viewer.modules.femtonics_mesc</i> ), 178 |
| <b>M</b>                                                                                                        | <i>mesmerize.analysis.clustering_metrics</i><br>module, 215                   |
| <code>make_runfile()</code> (in module <i>mesmerize.common.utils</i> ),<br>166                                  | <i>mesmerize.analysis.math.cross_correlation</i><br>module, 212               |
| <code>make_workkdir()</code> (in module <i>mesmerize.common.utils</i> ),<br>166                                 | <i>mesmerize.analysis.utils</i><br>module, 210                                |
| <code>manager</code> ( <i>mesmerize.viewer.modules.roi_manager.ModuleGUI</i><br>attribute), 180                 | <i>mesmerize.common</i><br>module, 166                                        |
| <code>ManagerCNMFROI</code> (class in <i>mesmerize.viewer.modules.roi_manager_modules.managers</i> ),<br>184    | <i>mesmerize.common.qdialogs</i><br>module, 168                               |
| <code>ManagerManual</code> (class in <i>mesmerize.viewer.modules.roi_manager_modules.managers</i> ),<br>181     | <i>mesmerize.common.utils</i><br>module, 166                                  |
| <code>ManagerScatterROI</code> (class in <i>mesmerize.viewer.modules.roi_manager_modules.managers</i> ),<br>182 | <i>mesmerize.pyqtgraphCore.flowchart.library.Biology</i><br>module, 219       |
| <code>ManagerVolCNMF</code> (class in <i>mesmerize.viewer.modules.roi_manager_modules.managers</i> ),<br>183    | <i>mesmerize.pyqtgraphCore.flowchart.library.Clustering</i><br>module, 220    |
| <code>ManagerVolROI</code> (class in <i>mesmerize.viewer.modules.roi_manager_modules.managers</i> ),<br>183     | <i>mesmerize.pyqtgraphCore.flowchart.library.Data</i><br>module, 216          |
| <code>Manifold</code> (class in <i>mesmerize.pyqtgraphCore.flowchart.library.Transform</i> ),<br>220            | <i>mesmerize.pyqtgraphCore.flowchart.library.Display</i><br>module, 217       |
| <code>ManualDFoF</code> (class in <i>mesmerize.pyqtgraphCore.flowchart.library.Biology</i> ),<br>219            | <i>mesmerize.pyqtgraphCore.flowchart.library.Hierarchical</i><br>module, 220  |
| <code>ManualROI</code> (class in <i>mesmerize.viewer.modules.roi_manager_modules.roi_types</i> ),<br>190        | <i>mesmerize.pyqtgraphCore.flowchart.library.Math</i><br>module, 219          |
| <code>map_labels_to_colors()</code> (in module <i>mesmerize.plotting.utils</i> ), 221                           | <i>mesmerize.pyqtgraphCore.flowchart.library.Signal</i><br>module, 218        |
| <code>maps</code> ( <i>mesmerize.viewer.modules.stimulus_mapping.ModuleGUI</i><br>property), 198                | <i>mesmerize.pyqtgraphCore.flowchart.library.Transform</i><br>module, 220     |
| <code>MaxInconsistent</code> (class in <i>mesmerize.pyqtgraphCore.flowchart.library.Hierarchical</i> ),<br>220  | module<br><i>mesmerize.analysis.clustering_metrics</i> ,<br>215               |
| <code>MaxIncStat</code> (class in <i>mesmerize.pyqtgraphCore.flowchart.library.Hierarchical</i> ),<br>220       | <i>mesmerize.analysis.math.cross_correlation</i> ,<br>212                     |
| <code>Merge</code> (class in <i>mesmerize.pyqtgraphCore.flowchart.library.Data</i> ),<br>216                    | <i>mesmerize.analysis.utils</i> , 210                                         |
| <code>merge()</code> ( <i>mesmerize.analysis.data_types.HistoryTrace</i><br>class method), 206                  | <i>mesmerize.common</i> , 166                                                 |
| <code>merge()</code> ( <i>mesmerize.Transmission</i> class method), 203                                         | <i>mesmerize.common.qdialogs</i> , 168                                        |
| <code>MES</code> (class in <i>mesmerize.viewer.core.mesfile</i> ), 172                                          | <i>mesmerize.common.utils</i> , 166                                           |
| <code>mesc_navigator</code> ( <i>mesmerize.viewer.modules.femtonics_mesc.ModuleGUI</i><br>attribute), 178       | <i>mesmerize.pyqtgraphCore.flowchart.library.Biology</i> ,<br>219             |
|                                                                                                                 | <i>mesmerize.pyqtgraphCore.flowchart.library.Clustering</i> ,<br>220          |
|                                                                                                                 | <i>mesmerize.pyqtgraphCore.flowchart.library.Data</i> ,<br>216                |
|                                                                                                                 | <i>mesmerize.pyqtgraphCore.flowchart.library.Display</i> ,<br>217             |
|                                                                                                                 | <i>mesmerize.pyqtgraphCore.flowchart.library.Hierarchical</i><br>220          |
|                                                                                                                 | <i>mesmerize.pyqtgraphCore.flowchart.library.Math</i> ,<br>219                |
|                                                                                                                 | <i>mesmerize.pyqtgraphCore.flowchart.library.Signal</i> ,<br>218              |

- mesmerize.pyqtgraphCore.flowchart.library.TransformDialog (class in mesmerize.viewer.modules.batch\_manager), 175
- ModuleGUI (class in mesmerize.viewer.modules.caiman\_motion\_correction), 177
- ModuleGUI (class in mesmerize.viewer.modules.cnmf), 177
- ModuleGUI (class in mesmerize.viewer.modules.cnmfe), 177
- ModuleGUI (class in mesmerize.viewer.modules.femtonics\_mesc), 178
- ModuleGUI (class in mesmerize.viewer.modules.roi\_manager), 180
- ModuleGUI (class in mesmerize.viewer.modules.stimulus\_mapping), 198
- ModuleGUI (class in mesmerize.viewer.modules.tiff\_io), 176
- ## N
- n\_clusters (mesmerize.plotting.KShapeWidget property), 228
- ncc\_c() (in module mesmerize.analysis.math.cross\_correlation), 212
- NeuralDynamics (class in mesmerize.pyqtgraphCore.flowchart.library.Transform), 220
- Normalize (class in mesmerize.pyqtgraphCore.flowchart.library.Signal), 218
- NormRaw (class in mesmerize.pyqtgraphCore.flowchart.library.Data), 216
- ## O
- open\_in\_viewer() (mesmerize.plotting.DatapointTracerWidget method), 224
- open\_plot() (mesmerize.plotting.HeatmapTracerWidget method), 226
- open\_plot() (mesmerize.plotting.ProportionsWidget method), 230
- open\_plot() (mesmerize.plotting.ScatterPlotWidget method), 231
- open\_plot() (mesmerize.plotting.SpaceMapWidget method), 233
- open\_plot() (mesmerize.plotting.widgets.base.\_AbstractBasePlotWidget method), 223
- open\_plot() (mesmerize.plotting.widgets.base.BasePlotWidget method), 224
- open\_plot\_dialog() (mesmerize.plotting.HeatmapTracerWidget method), 226
- open\_plot\_dialog() (mesmerize.plotting.ProportionsWidget method), 230
- open\_plot\_dialog() (mesmerize.plotting.ScatterPlotWidget method), 231
- open\_plot\_dialog() (mesmerize.plotting.SpaceMapWidget method), 233
- open\_plot\_dialog() (mesmerize.plotting.widgets.base.BasePlotWidget method), 224
- organize\_dataframe\_columns() (in module mesmerize.analysis.utils), 211
- ## P
- package\_for\_project() (mesmerize.viewer.modules.roi\_manager.ModuleGUI method), 180
- pad\_arrays() (in module mesmerize.analysis.utils), 211
- pad\_input\_data() (mesmerize.plotting.KShapeWidget method), 228
- PadArrays (class in mesmerize.pyqtgraphCore.flowchart.library.Data), 216
- Page (class in mesmerize.viewer.modules.stimmap\_modules.page), 199
- params (mesmerize.plotting.KShapeWidget property), 228
- path (mesmerize.viewer.modules.femtonics\_mesc.MEScNavigator attribute), 178
- PCA (class in mesmerize.pyqtgraphCore.flowchart.library.Transform), 220
- PeakDetect (class in mesmerize.pyqtgraphCore.flowchart.library.Signal), 218
- PeakFeatures (class in mesmerize.pyqtgraphCore.flowchart.library.Signal), 218
- PgScatterPlot (class in mesmerize.plotting.variants), 232
- Plot (class in mesmerize.pyqtgraphCore.flowchart.library.Display), 217
- plot (mesmerize.plotting.variants.Heatmap attribute), 227
- plot (mesmerize.plotting.widgets.kshape.widget.KShapePlot attribute), 229
- plot\_manual\_roi\_regions() (mesmerize.viewer.modules.roi\_manager\_modules.roi\_list.ROIList method), 186

plot\_widgets (mesmerize.viewer.modules.femtonics\_mesc.ModuleGUI attribute), 178  
 PowerSpectralDensity (class in mesmerize.pyqtgraphCore.flowchart.library.Signal), 218  
 present\_exceptions() (in module mesmerize.common.qdialogs), 168  
 previous\_index (mesmerize.viewer.modules.roi\_manager\_modules.roi\_list.ROIList attribute), 185  
 process() (mesmerize.pyqtgraphCore.flowchart.library.common.CtrlNode method), 221  
 process\_batch() (mesmerize.viewer.modules.batch\_manager.ModuleGUI method), 176  
 Proportions (class in mesmerize.pyqtgraphCore.flowchart.library.Display), 217  
 ProportionsWidget (class in mesmerize.plotting), 230  
**R**  
 register() (mesmerize.plotting.utils.WidgetRegistry method), 222  
 reindex\_colormap() (mesmerize.viewer.modules.roi\_manager\_modules.roi\_list.ROIList method), 185  
 remove\_from\_viewer() (mesmerize.viewer.modules.roi\_manager\_modules.roi\_types.\_AbstractBaseROI method), 188  
 remove\_from\_viewer() (mesmerize.viewer.modules.roi\_manager\_modules.roi\_types.BaseROI method), 189  
 remove\_from\_viewer() (mesmerize.viewer.modules.roi\_manager\_modules.roi\_types.CNMROI method), 197  
 remove\_from\_viewer() (mesmerize.viewer.modules.roi\_manager\_modules.roi\_types.ManualROI method), 191  
 remove\_from\_viewer() (mesmerize.viewer.modules.roi\_manager\_modules.roi\_types.ScatterROI method), 193  
 remove\_from\_viewer() (mesmerize.viewer.modules.roi\_manager\_modules.roi\_types.VolCNMF method), 195  
 Resample (class in mesmerize.pyqtgraphCore.flowchart.library.Signal), 218  
 reset\_color() (mesmerize.viewer.modules.roi\_manager\_modules.roi\_types.\_AbstractBaseROI method), 187  
 reset\_color() (mesmerize.viewer.modules.roi\_manager\_modules.roi\_types.BaseROI method), 189  
 reset\_color() (mesmerize.viewer.modules.roi\_manager\_modules.roi\_types.CNMROI method), 196  
 reset\_color() (mesmerize.viewer.modules.roi\_manager\_modules.roi\_types.ManualROI method), 191  
 reset\_color() (mesmerize.viewer.modules.roi\_manager\_modules.roi\_types.ScatterROI method), 193  
 reset\_color() (mesmerize.viewer.modules.roi\_manager\_modules.roi\_types.VolCNMF method), 194  
 restore\_from\_states() (mesmerize.viewer.modules.roi\_manager\_modules.managers.ManagerCNMF method), 184  
 restore\_from\_states() (mesmerize.viewer.modules.roi\_manager\_modules.managers.ManagerManualROI method), 182  
 restore\_from\_states() (mesmerize.viewer.modules.roi\_manager\_modules.managers.ManagerScatterROI method), 182  
 restore\_from\_states() (mesmerize.viewer.modules.roi\_manager\_modules.managers.ManagerVolCNMF method), 184  
 restoreState() (mesmerize.pyqtgraphCore.flowchart.library.common.CtrlNode method), 221  
 RFFT (class in mesmerize.pyqtgraphCore.flowchart.library.Signal), 218  
 roi\_list (mesmerize.viewer.modules.roi\_manager\_modules.managers.Abstraction attribute), 181  
 roi\_manager (mesmerize.viewer.core.ViewerWorkEnv attribute), 171  
 ROIList (class in mesmerize.viewer.modules.roi\_manager\_modules.roi\_list), 185  
**S**  
 sample\_df (mesmerize.plotting.SpaceMapWidget attribute), 233  
 sample\_id (mesmerize.viewer.core.ViewerWorkEnv attribute), 171  
 SaveCNMF (class in mesmerize.pyqtgraphCore.flowchart.library.Data), 216  
 save\_dataframe() (mesmerize.common.utils.HdfTools static method), 166  
 save\_dict() (mesmerize.common.utils.HdfTools static method), 167  
 save\_plot() (mesmerize.plotting.HeatmapTracerWidget method), 226  
 save\_plot() (mesmerize.plotting.ProportionsWidget method), 226

method), 230

save\_plot() (mesmerize.plotting.ScatterPlotWidget method), 231

save\_plot() (mesmerize.plotting.SpaceMapWidget method), 233

save\_plot() (mesmerize.plotting.widgets.base.\_AbstractBasePlotWidget method), 223

save\_plot() (mesmerize.plotting.widgets.base.BasePlotWidget method), 224

save\_plot\_dialog() (mesmerize.plotting.HeatmapTracerWidget method), 226

save\_plot\_dialog() (mesmerize.plotting.ProportionsWidget method), 230

save\_plot\_dialog() (mesmerize.plotting.ScatterPlotWidget method), 231

save\_plot\_dialog() (mesmerize.plotting.SpaceMapWidget method), 233

save\_plot\_dialog() (mesmerize.plotting.widgets.base.BasePlotWidget method), 223

saveState() (mesmerize.pyqtgraphCore.flowchart.library.common.CtrlNode method), 221

SavitzkyGolay (class in mesmerize.pyqtgraphCore.flowchart.library.Signal), 218

ScalerMeanVariance (class in mesmerize.pyqtgraphCore.flowchart.library.Signal), 218

ScatterPlot (class in mesmerize.pyqtgraphCore.flowchart.library.Display), 217

ScatterPlotWidget (class in mesmerize.plotting), 231

ScatterROI (class in mesmerize.viewer.modules.roi\_manager\_modules.roi\_types), 192

SelectColumns (class in mesmerize.pyqtgraphCore.flowchart.library.Data), 217

selector (mesmerize.plotting.variants.Heatmap attribute), 227

SelectRows (class in mesmerize.pyqtgraphCore.flowchart.library.Data), 217

session (mesmerize.viewer.modules.femtonics\_mesc.MEScNavigator attribute), 179

sessions (mesmerize.viewer.modules.femtonics\_mesc.MEScNavigator attribute), 179

set() (mesmerize.plotting.variants.Heatmap method), 227

set\_all\_from\_states() (mesmerize.viewer.modules.roi\_manager.ModuleGUI method), 180

set\_channel() (mesmerize.viewer.modules.femtonics\_mesc.MEScNavigator method), 179

set\_color() (mesmerize.viewer.modules.roi\_manager\_modules.roi\_types.\_AbstractBaseROI method), 187

set\_color() (mesmerize.viewer.modules.roi\_manager\_modules.roi\_types.BaseROI method), 189

set\_color() (mesmerize.viewer.modules.roi\_manager\_modules.roi\_types.CNMFROI method), 196

set\_color() (mesmerize.viewer.modules.roi\_manager\_modules.roi\_types.ManualROI method), 191

set\_color() (mesmerize.viewer.modules.roi\_manager\_modules.roi\_types.ScatterROI method), 193

set\_color() (mesmerize.viewer.modules.roi\_manager\_modules.roi\_types.VolCNMF method), 195

set\_current\_datapoint() (mesmerize.plotting.HeatmapTracerWidget method), 226

set\_current\_datapoint() (mesmerize.plotting.ScatterPlotWidget method), 231

set\_current\_index() (mesmerize.viewer.modules.roi\_manager\_modules.roi\_list.ROIList method), 185

set\_curve\_data() (mesmerize.viewer.modules.roi\_manager\_modules.roi\_types.CNMFROI method), 197

set\_curve\_data() (mesmerize.viewer.modules.roi\_manager\_modules.roi\_types.ScatterROI method), 192

set\_curve\_data() (mesmerize.viewer.modules.roi\_manager\_modules.roi\_types.VolCNMF method), 196

set\_data() (mesmerize.plotting.HeatmapSplitterWidget method), 225

set\_data() (mesmerize.plotting.HeatmapTracerWidget method), 226

set\_data() (mesmerize.viewer.modules.stimmap\_modules.page.Page method), 199

set\_file() (mesmerize.viewer.modules.femtonics\_mesc.ModuleGUI method), 178

set\_file\_path() (mesmerize.viewer.modules.femtonics\_mesc.MEScNavigator method), 179

set\_image() (mesmerize.plotting.DatapointTracerWidget method),

|                        |                                                                                               |                                                                                                                         |
|------------------------|-----------------------------------------------------------------------------------------------|-------------------------------------------------------------------------------------------------------------------------|
| 224                    |                                                                                               | set_proj_path() ( <i>mesmerize.Transmission</i> method), 202                                                            |
| set_input()            | ( <i>mesmerize.plotting.KShapeWidget</i> method), 228                                         | set_roi_graphics_object() ( <i>mesmerize.viewer.modules.roi_manager_modules.roi_types._AbstractBaseROI</i> method), 187 |
| set_input()            | ( <i>mesmerize.plotting.ScatterPlotWidget</i> method), 231                                    | set_roi_graphics_object() ( <i>mesmerize.viewer.modules.roi_manager_modules.roi_types.BaseROI</i> method), 189          |
| set_input()            | ( <i>mesmerize.plotting.widgets.base._AbstractBasePlotWidget</i> method), 222                 | set_roi_graphics_object() ( <i>mesmerize.viewer.modules.roi_manager_modules.roi_types.CNMFROI</i> method), 196          |
| set_input()            | ( <i>mesmerize.plotting.widgets.base.BasePlotWidget</i> method), 223                          | set_roi_graphics_object() ( <i>mesmerize.viewer.modules.roi_manager_modules.roi_types.ManualROI</i> method), 190        |
| set_legend()           | ( <i>mesmerize.plotting.variants.PgScatterPlot</i> method), 232                               | set_roi_graphics_object() ( <i>mesmerize.viewer.modules.roi_manager_modules.roi_types.ScatterROI</i> method), 192       |
| set_list_widget_tags() | ( <i>mesmerize.viewer.modules.roi_manager_modules.roi_list.ROIList</i> method), 186           | set_roi_graphics_object() ( <i>mesmerize.viewer.modules.roi_manager_modules.roi_types.VolCNMFROI</i> method), 194       |
| set_original_color()   | ( <i>mesmerize.viewer.modules.roi_manager_modules.roi_types._AbstractBaseROI</i> method), 187 | set_session() ( <i>mesmerize.viewer.modules.femtonics_mesc.MEScNavigator</i> method), 179                               |
| set_original_color()   | ( <i>mesmerize.viewer.modules.roi_manager_modules.roi_types.BaseROI</i> method), 189          | set_spot_size() ( <i>mesmerize.viewer.modules.roi_manager_modules.managers.ManagerScatterROI</i> method), 183           |
| set_original_color()   | ( <i>mesmerize.viewer.modules.roi_manager_modules.roi_types.CNMFROI</i> method), 196          | set_spot_size() ( <i>mesmerize.viewer.modules.roi_manager_modules.managers.ManagerVolROI</i> method), 184               |
| set_original_color()   | ( <i>mesmerize.viewer.modules.roi_manager_modules.roi_types.ManualROI</i> method), 191        | set_state() ( <i>mesmerize.plotting.utils.WidgetRegistry</i> method), 222                                               |
| set_original_color()   | ( <i>mesmerize.viewer.modules.roi_manager_modules.roi_types.ScatterROI</i> method), 193       | set_statusbar() ( <i>mesmerize.viewer.core.ViewerUtils</i> method), 172                                                 |
| set_original_color()   | ( <i>mesmerize.viewer.modules.roi_manager_modules.roi_types.VolROI</i> method), 195           | set_vol_color() ( <i>mesmerize.viewer.modules.roi_manager_modules.roi_types._AbstractBaseROI</i> method), 187           |
| set_pg_roi_plot()      | ( <i>mesmerize.viewer.modules.roi_manager_modules.roi_list.ROIList</i> method), 186           | set_tag() ( <i>mesmerize.viewer.modules.roi_manager_modules.roi_types.BaseROI</i> method), 189                          |
| set_plot_opts()        | ( <i>mesmerize.plotting.ScatterPlotWidget</i> method), 231                                    | set_tag() ( <i>mesmerize.viewer.modules.roi_manager_modules.roi_types.CNMFROI</i> method), 197                          |
| set_plot_opts()        | ( <i>mesmerize.plotting.SpaceMapWidget</i> method), 233                                       | set_tag() ( <i>mesmerize.viewer.modules.roi_manager_modules.roi_types.ManualROI</i> method), 191                        |
| set_plot_opts()        | ( <i>mesmerize.plotting.widgets.base._AbstractBasePlotWidget</i> method), 223                 | set_tag() ( <i>mesmerize.viewer.modules.roi_manager_modules.roi_types.ScatterROI</i> method), 193                       |
| set_plot_opts()        | ( <i>mesmerize.plotting.widgets.base.BasePlotWidget</i> method), 223                          | set_tag() ( <i>mesmerize.viewer.modules.roi_manager_modules.roi_types.VolROI</i> method), 195                           |
| set_plots()            | ( <i>mesmerize.plotting.widgets.kshape.widget.KShapeMeansPlot</i> method), 229                | set_text() ( <i>mesmerize.viewer.modules.roi_manager_modules.roi_types._AbstractBaseROI</i> method), 187                |
| set_previous_index()   | ( <i>mesmerize.viewer.modules.roi_manager_modules.roi_list.ROIList</i> method), 186           | set_text() ( <i>mesmerize.viewer.modules.roi_manager_modules.roi_types.BaseROI</i> method), 189                         |
|                        |                                                                                               | set_text() ( <i>mesmerize.viewer.modules.roi_manager_modules.roi_types.CNMFROI</i> method), 196                         |
|                        |                                                                                               | set_text() ( <i>mesmerize.viewer.modules.roi_manager_modules.roi_types.ManualROI</i> method), 191                       |
|                        |                                                                                               | set_text() ( <i>mesmerize.viewer.modules.roi_manager_modules.roi_types.ScatterROI</i> method), 192                      |
|                        |                                                                                               | set_text() ( <i>mesmerize.viewer.modules.roi_manager_modules.roi_types.VolROI</i> method), 194                          |

- `method`), 193
- `set_text()` (*mesmerize.viewer.modules.roi\_manager\_modules.roi\_list.ROIList* class method), 195
- `set_transmission()` (*mesmerize.plotting.HeatmapSplitterWidget* method), 225
- `set_unit()` (*mesmerize.viewer.modules.femtonics\_mesc.MEScNavigator* method), 179
- `set_units()` (*mesmerize.viewer.modules.stimmap\_modules.page.Page* method), 199
- `set_update_live()` (*mesmerize.plotting.ScatterPlotWidget* method), 231
- `set_widget()` (*mesmerize.plotting.DatapointTracerWidget* method), 224
- `set_zlevel()` (*mesmerize.viewer.modules.roi\_manager\_modules.manager.StimMap* method), 183
- `set_zlevel()` (*mesmerize.viewer.modules.roi\_manager\_modules.roi\_types.SpaceMapWidget* method), 194
- `show_item_info()` (*mesmerize.viewer.modules.batch\_manager.ModuleGUI* method), 176
- `sig_channel_doubleclicked` (*mesmerize.viewer.modules.femtonics\_mesc.MEScNavigator* attribute), 178
- `sig_hpath_changed` (*mesmerize.viewer.modules.femtonics\_mesc.MEScNavigator* attribute), 178
- `sig_output_changed` (*mesmerize.plotting.KShapeWidget* attribute), 228
- `sig_selection_changed` (*mesmerize.plotting.variants.Heatmap* attribute), 227
- `SigmaMAD` (class in *mesmerize.pyqtgraphCore.flowchart.library.Signal*), 218
- `signal_blocker()` (*mesmerize.plotting.widgets.base.BasePlotWidget* class method), 223
- `signal_spot_clicked` (*mesmerize.plotting.variants.PgScatterPlot* attribute), 232
- `slot_delete_roi_menu()` (*mesmerize.viewer.modules.roi\_manager.ModuleGUI* method), 180
- `slot_show_all_checkbox_clicked()` (*mesmerize.viewer.modules.roi\_manager\_modules.roi\_list.ROIList* method), 186
- `SpaceMap` (class in *mesmerize.pyqtgraphCore.flowchart.library.Display*), 217
- `SpaceMapWidget` (class in *mesmerize.plotting*), 233
- `StaticDFoFo` (class in *mesmerize.pyqtgraphCore.flowchart.library.Biology*), 219
- `stim_maps` (*mesmerize.viewer.core.ViewerWorkEnv* attribute), 171
- `StimMap` (class in *mesmerize.pyqtgraphCore.flowchart.library.Biology*), 219
- `StimMapVolROI` (class in *mesmerize.pyqtgraphCore.flowchart.library.Biology*), 219
- `StimMapVolCNMF` (class in *mesmerize.pyqtgraphCore.flowchart.library.Data*), 217
- `start_backend()` (*mesmerize.viewer.modules.roi\_manager.ModuleGUI* method), 180
- `start_manual_mode()` (*mesmerize.viewer.modules.roi\_manager.ModuleGUI* method), 180
- `start_process()` (*mesmerize.plotting.KShapeWidget* method), 229
- `StaticDFoFo` (class in *mesmerize.pyqtgraphCore.flowchart.library.Biology*), 219
- `stim_maps` (*mesmerize.viewer.core.ViewerWorkEnv* attribute), 171
- `StimMapVolROI` (class in *mesmerize.pyqtgraphCore.flowchart.library.Biology*), 219
- `StimMapVolCNMF` (class in *mesmerize.pyqtgraphCore.flowchart.library.Data*), 217
- `TextFilter` (class in *mesmerize.pyqtgraphCore.flowchart.library.Data*), 217
- `Timeseries` (class in *mesmerize.pyqtgraphCore.flowchart.library.Display*), 217
- `to_dict()` (*mesmerize.analysis.data\_types.HistoryTrace* method), 205
- `to_dict()` (*mesmerize.Transmission* method), 202
- `to_hdf5()` (*mesmerize.analysis.cross\_correlation.CC\_Data* method), 215
- `to_hdf5()` (*mesmerize.Transmission* method), 202
- `to_json()` (*mesmerize.analysis.data\_types.HistoryTrace* method), 205
- `to_pandas()` (*mesmerize.viewer.core.ViewerWorkEnv* method), 171
- `to_pickle()` (*mesmerize.analysis.data\_types.HistoryTrace* method), 205
- `to_pickle()` (*mesmerize.Transmission* method), 202
- `to_pickle()` (*mesmerize.viewer.core.ViewerWorkEnv* method), 171
- `to_state()` (*mesmerize.viewer.modules.roi\_manager\_modules.roi\_types.SpaceMapWidget* method), 188
- `to_state()` (*mesmerize.viewer.modules.roi\_manager\_modules.roi\_types.SpaceMapWidget* method), 189
- `to_state()` (*mesmerize.viewer.modules.roi\_manager\_modules.roi\_types.SpaceMapWidget* method), 197
- `to_state()` (*mesmerize.viewer.modules.roi\_manager\_modules.roi\_types.SpaceMapWidget* method), 190
- `to_state()` (*mesmerize.viewer.modules.roi\_manager\_modules.roi\_types.SpaceMapWidget* method), 192



- to\_state() (*mesmerize.viewer.modules.roi\_manager\_modules.roi\_types.VolCNMF* method), 194
- train\_data (*mesmerize.plotting.KShapeWidget* property), 228
- Transmission (class in *mesmerize*), 201
- transmission (*mesmerize.plotting.HeatmapTracerWidget* property), 226
- transmission (*mesmerize.plotting.KShapeWidget* property), 229
- transmission (*mesmerize.plotting.ProportionsWidget* property), 230
- transmission (*mesmerize.plotting.ScatterPlotWidget* property), 231
- transmission (*mesmerize.plotting.SpaceMapWidget* property), 233
- transmission (*mesmerize.plotting.widgets.base.\_AbstractBasePlotWidget* property), 222
- transmission (*mesmerize.plotting.widgets.base.BasePlotWidget* property), 223
- TVDiff (class in *mesmerize.pyqtgraphCore.flowchart.library.Math*), 219
- ## U
- unit (*mesmerize.viewer.modules.femtonics\_mesc.MEScNavigator* attribute), 179
- units (*mesmerize.viewer.modules.femtonics\_mesc.MEScNavigator* attribute), 179
- update\_idx\_components() (*mesmerize.viewer.modules.roi\_manager\_modules.manager.CNMFFROI* method), 184
- update\_idx\_components() (*mesmerize.viewer.modules.roi\_manager\_modules.managers.ManagerVolCNMF* method), 184
- update\_plot() (*mesmerize.plotting.HeatmapTracerWidget* method), 226
- update\_plot() (*mesmerize.plotting.ProportionsWidget* method), 230
- update\_plot() (*mesmerize.plotting.ScatterPlotWidget* method), 231
- update\_plot() (*mesmerize.plotting.SpaceMapWidget* method), 233
- update\_plot() (*mesmerize.plotting.widgets.base.\_AbstractBasePlotWidget* method), 222
- update\_plot() (*mesmerize.plotting.widgets.base.BasePlotWidget* method), 223
- update\_roi\_defs\_from\_configuration() (*mesmerize.viewer.modules.roi\_manager\_modules.roi\_list.ROIList* method), 172
- update\_workEnv() (*mesmerize.viewer.core.ViewerUtils* method), 172
- use\_open\_dir\_dialog() (in module *mesmerize.common.qdialogs*), 169
- use\_open\_file\_dialog() (in module *mesmerize.common.qdialogs*), 168
- use\_save\_file\_dialog() (in module *mesmerize.common.qdialogs*), 168
- ## V
- vi (*mesmerize.viewer.modules.roi\_manager\_modules.roi\_list.ROIList* attribute), 185
- viewer (*mesmerize.viewer.core.ViewerUtils* attribute), 172
- ViewerUtils (class in *mesmerize.viewer.core*), 171
- ViewerWorkEnv (class in *mesmerize.viewer.core*), 169
- ViewHistory (class in *mesmerize.pyqtgraphCore.flowchart.library.Data*), 217
- ViewTransmission (class in *mesmerize.pyqtgraphCore.flowchart.library.Data*), 217
- VolCNMF (class in *mesmerize.viewer.modules.roi\_manager\_modules.roi\_types*), 194
- ## W
- WidgetRegistry (class in *mesmerize.plotting.utils*), 222
- work\_env (*mesmerize.viewer.core.ViewerUtils* attribute), 172
- ## X
- X.ManagerCNMFROI
- XpowerY (class in *mesmerize.pyqtgraphCore.flowchart.library.Math*), 219
- ## Y
- y\_pred (*mesmerize.plotting.KShapeWidget* property), 228
- ## Z
- ZScore (class in *mesmerize.pyqtgraphCore.flowchart.library.Math*), 219
